# Supplementary material
Source: publisher site journal article supplement (https://www.spandidos-publications.com/1922/downloadSupplementary)
Supplement: Supplementary file 2 [file downloadSupplementary]

## Sheet: data3
ProbeID	Gene_Symbol	Gene_ID	RefSeqAccession	S1_B/S1_A.fc	S1_B/S1_A.volume	S2_B/S2_A.fc	S2_B/S2_A.volume	N_S1_A	N_S1_B	N_S2_A	N_S2_B	S1_A.gProcessedSignal	S1_B.gProcessedSignal	S2_A.gProcessedSignal	S2_B.gProcessedSignal	S1_A.Flag	S1_B.Flag	S2_A.Flag	S2_B.Flag	fail.count	PrimaryAccession	GenbankAccession	UniGeneID	GeneName	EnsemblID	TIGRID	GO	Description	GenomicCoordinates	Cytoband	Sequence
A_19_P00316000	LINC-PINT	378805	NR_109851	-1.07011	6.90868	4.47858	5.99646	6.95773	6.85998	5.01169	7.17473	136.94	134.91	25.5486	143.844	P	P	P	P	0	NR_109851	NR_109851	Hs.744176	long intergenic non-protein coding RNA, p53 induced transcript		THC2550566		Homo sapiens long intergenic non-protein coding RNA, p53 induced transcript (LINC-PINT), transcript variant 4, long non-coding RNA [NR_109851]	chr7:130630360-130630301	hs|7q32.3	TTTTCCATGATTAGGATAAGTAGCCAGGGCTTGGCTAGTTGGAGAGTTACTCGAACCTCA
A_19_P00317023	lnc-MYC-2			-2.87224	10.4161	-12.8951	10.3303	11.205	9.68282	12.338	8.64926	3058.89	873.616	4145.59	395.538	P	P	P	P	0	lnc-MYC-2:22		Hs.133107	lnc-MYC-2:22		THC2534303		Homo sapiens cDNA FLJ26234 fis, clone ADG09627. [AK129745]	chr8:129004109-129004168	hs|8q24.21	TGTCTAGAAATCAGCCTGGCTGGGACGCACACCAATAGGAGGGCATCCTCACCTTTCCCA
A_19_P00317180	PVT1	5820	NR_003367	-2.90954	7.82916	-4.07528	7.87941	8.63737	7.09658	8.95777	6.93087	467.225	156.877	389.927	120.757	P	P	P	P	0	NR_003367	NR_003367	Hs.133107	Pvt1 oncogene (non-protein coding)	ENST00000613916	THC2538215		Homo sapiens Pvt1 oncogene (non-protein coding) (PVT1), long non-coding RNA [NR_003367]	chr8:129108781-129108840	hs|8q24.21	CTCCCAGATTCACAAGCCCCACCAAGAGGATCACCCCAGGAACGCTTGGAGGCTGAGGAG
A_19_P00317360	ATP2C1	27032	NM_001199182	-20.4614	7.17345	-1.44224	6.3677	9.67405	5.31922	6.63734	6.10902	999.317	47.2005	79.8005	68.6241	P	P	P	P	0	NM_001199182	NM_001199182	Hs.584884	ATPase, Ca++ transporting, type 2C, member 1	ENST00000504381	THC2696352	GO:0000139(Golgi membrane)|GO:0004871(signal transducer activity)|GO:0005388(calcium-transporting ATPase activity)|GO:0005509(calcium ion binding)|GO:0005524(ATP binding)|GO:0005794(Golgi apparatus)|GO:0005802(trans-Golgi network)|GO:0006816(calcium ion transport)|GO:0006828(manganese ion transport)|GO:0006874(cellular calcium ion homeostasis)|GO:0007165(signal transduction)|GO:0008152(metabolic …	Homo sapiens ATPase, Ca++ transporting, type 2C, member 1 (ATP2C1), transcript variant 8, mRNA [NM_001199182]	chr3:130569653-130569712	hs|3q22.1	GCTTTCCTCACTATGGATAGTCTGTTGCCTCCATCTAGATTCTCTTATTTCAAAAAATAT
A_19_P00318183	LINC01197	400456	NR_034095	-1.51035	5.00268	14.2912	5.94332	5.30896	4.71408	4.32677	8.16383	42.6314	30.8567	16.9051	285.491	P	P	P	P	0	NR_034095	NR_034095	Hs.536404	long intergenic non-protein coding RNA 1197	ENST00000508732	THC2613551		Homo sapiens long intergenic non-protein coding RNA 1197 (LINC01197), long non-coding RNA [NR_034095]	chr15:95822601-95822542	hs|15q26.2	GTCCTCCATTCCATTCCCTAATTTGTATGCAATGGCATTTAACATTTTGACTTTGCTTAA
A_19_P00318404	LINC00989	100506035	NR_038826	9.4712	8.77391	3.0988	9.0808	7.30076	10.5443	8.30152	9.93323	175.42	1553.24	247.505	934.999	P	P	P	M	0	NR_038826	NR_038826	Hs.507664	long intergenic non-protein coding RNA 989	ENST00000515544	THC2603307		Homo sapiens long intergenic non-protein coding RNA 989 (LINC00989), long non-coding RNA [NR_038826]	chr4:80497542-80497601	hs|4q21.21	CAATGGGTGCTGCCTGTGTGTTCCTTCCCCTAAGCTTTAAACTCAACTGATATTAAAGGT
A_19_P00320101	MIR4697HG	283174	NR_024344	5.46499	6.48846	2.22004	6.38167	5.378	7.82822	5.83225	6.98284	44.6922	256.98	45.5368	125.143	P	P	P	P	0	NR_024344	NR_024344	Hs.504370	MIR4697 host gene (non-protein coding)		THC2474019		Homo sapiens MIR4697 host gene (non-protein coding) (MIR4697HG), long non-coding RNA [NR_024344]	chr11:133767694-133767635	hs|11q25	GAGTGTGAACTTGAATGGCAACTAGAGGCTTACTTTTTGAACTTCAGGTATGTAACTCAA
A_19_P00320579	LINC-PINT	378805	NR_109855	5.10303	9.07203	19.1257	8.45278	7.97221	10.3236	6.58798	10.8454	282.472	1330.42	77.0636	1746.16	P	P	P	P	0	NR_109855	NR_109855	Hs.744176	long intergenic non-protein coding RNA, p53 induced transcript		THC2586849		Homo sapiens long intergenic non-protein coding RNA, p53 induced transcript (LINC-PINT), transcript variant 8, long non-coding RNA [NR_109855]	chr7:130792595-130792536	hs|7q32.3	AGGGAAATTCTCAAGAATACGCTCTACAAATCTACGTGCGCATCATTTTCACCTCGCGTC
A_19_P00320718	PCAT19	100505495	NR_040109	5.5212	6.39819	2.27702	6.59051	5.28332	7.74831	6.02362	7.21076	42.0075	243.974	51.7119	147.995	P	P	P	P	0	NR_040109	NR_040109	Hs.648878	prostate cancer associated transcript 19 (non-protein coding)	ENST00000598215	THC2628131		Homo sapiens prostate cancer associated transcript 19 (non-protein coding) (PCAT19), long non-coding RNA [NR_040109]	chr19:41985048-41984989	hs|19q13.2	TTATTTGGCTGGAGTGAGGTCTCATGTCTGCTTATGCGGTGGCTCGCTGCTCAGAACAGG
A_19_P00321014				1.11378	7.89762	4.92473	8.15742	7.82027	7.97573	7.08807	9.38811	253.799	283.654	107.467	647.796	P	P	P	P	0	XR_110931	XR_110931	Hs.691047			THC2496281		PREDICTED: Homo sapiens uncharacterized LOC100506661 (LOC100506661), misc_RNA [XR_110931]	chrX:15716353-15716412	hs|Xp22.2	GTCTAAGTGGTGGTTACTACATCAGCACACAAAATCCTGTTTAATTCATAAACTAAACTG
A_19_P00321076	PVT1	5820	NR_003367	-2.60733	7.37697	-4.02401	7.55039	8.10058	6.71801	8.62121	6.61258	309.829	122.056	310.456	96.4664	P	P	P	P	0	NR_003367	NR_003367	Hs.133107	Pvt1 oncogene (non-protein coding)	ENST00000613916	THC2538215		Homo sapiens Pvt1 oncogene (non-protein coding) (PVT1), long non-coding RNA [NR_003367]	chr8:129108768-129108827	hs|8q24.21	ACAGAATAACGGGCTCCCAGATTCACAAGCCCCACCAAGAGGATCACCCCAGGAACGCTT
A_19_P00321166	LOC100132356	100132356	NR_034127	5.76711	8.5781	1.74696	8.8323	7.40679	9.93464	8.43904	9.24389	189.962	1032.69	271.786	589.556	P	P	P	P	0	NR_034127	NR_034127	Hs.726831	uncharacterized LOC100132356		THC2474981		Homo sapiens uncharacterized LOC100132356 (LOC100132356), long non-coding RNA [NR_034127]	chr5:43065590-43065531	hs|5p12	AAACTTCGGATAGGCGCAAGAGGCACGGGTTTAGTGCTGACAAATATAATGGTAGGATCT
A_19_P00321183	lnc-LRIG2-4			-5.34132	7.53656	-5.48481	7.35788	8.84145	6.42425	8.68733	6.23189	543.428	98.8271	324.204	74.5482	P	P	P	P	0	lnc-LRIG2-4:3	BX648855	Hs.418285	lnc-LRIG2-4:3		THC2491933		Homo sapiens mRNA; cDNA DKFZp686L05231 (from clone DKFZp686L05231). [BX648855]	chr1:113511079-113511138	hs|1p13.2	TGCCACACCCTTCTAGGCATCCAAATTCAAGCATTTACAATGTACTTCATGAAGCAGTAC
A_19_P00321202	CRYBG3	131544	NM_153605	1.01426	7.57033	5.06353	7.02728	7.56013	7.58056	5.95396	8.2941	212.031	217.522	49.4696	312.521	P	P	P	P	0	NM_153605	NM_153605	Hs.733378	beta-gamma crystallin domain containing 3	ENST00000389622		GO:0030246(carbohydrate binding)	Homo sapiens beta-gamma crystallin domain containing 3 (CRYBG3), mRNA [NM_153605]	chr3:97562046-97562105	hs|3q11.2	AATGAGCCCATGAGCACAAGTCAGAAAAAGGAAAATGTACTTTCATCAGAAGCAGTAAAG
A_19_P00321361	LINC-PINT	378805	NR_109851	1.98244	10.3089	9.61306	9.72949	9.82708	10.8144	8.23299	11.498	1121.07	1877.01	237.46	2761.66	P	P	P	P	0	NR_109851	NR_109851	Hs.744176	long intergenic non-protein coding RNA, p53 induced transcript		THC2504206		Homo sapiens long intergenic non-protein coding RNA, p53 induced transcript (LINC-PINT), transcript variant 4, long non-coding RNA [NR_109851]	chr7:130628992-130628933	hs|7q32.3	GCAACTTTCTTCTTTGTGCTCCAGGAACCTACGCACTATATATATAAATAAAGCTTAAGT
A_19_P00321461				-3.46406	7.70364	-4.07316	7.94412	8.65184	6.85937	9.02153	6.99538	471.963	134.812	408.033	126.363	P	P	P	P	0	ENST00000512915		Hs.15833		ENST00000512915	THC2536847			chr4:103340480-103340421	hs|4q24	TTTTCTTCTCCCTCAGTTCAAATGAGATAAAGATCCTCCTCTCCTCACAGTGAACATGAG
A_19_P00321670				-5.17481	7.17485	-2.91087	7.31585	8.45792	6.08642	8.12706	6.58561	406.264	79.5199	221.314	94.9295	P	P	P	P	0	ENST00000451910		Hs.634195		ENST00000451910	THC2616258		zt85h04.r1 Soares_testis_NHT Homo sapiens cDNA clone IMAGE:729175 5', mRNA sequence [AA397666]	chr6:43819919-43819860	hs|6p21.1	ATGCAGGTATCATTAACAGCCTGGAGCACTGTGGCCTGTCCACTCTCAACCCTCTGCTGC
A_19_P00322611	lnc-SPAG1-3			-52.1283	6.75083	-46.5119	8.06379	10.1805	4.47655	11.296	5.75645	1449.29	25.233	1982.6	53.3226	P	P	P	P	0	lnc-SPAG1-3:3			lnc-SPAG1-3:3		THC2712518		LNCipedia lincRNA (lnc-SPAG1-3), lincRNA [lnc-SPAG1-3:3]	chr8:101513237-101513296	hs|8q22.2	CTGATGACAATGCCTGCTTGCTGATGGTTACGATGATCATAGCAGTGTGCATTTTGTATG
A_19_P00322977	LINC-PINT	378805	NR_109854	5.02478	10.074	19.8013	9.83477	8.97654	11.3056	7.91407	12.2216	600.35	2584.43	190.837	4507.22	P	P	P	P	0	NR_109854	NR_109854	Hs.744176	long intergenic non-protein coding RNA, p53 induced transcript		THC2586849		Homo sapiens long intergenic non-protein coding RNA, p53 induced transcript (LINC-PINT), transcript variant 7, long non-coding RNA [NR_109854]	chr7:130737303-130737244	hs|7q32.3	ATGCTTTTACGAGTTAGAAGAGTTGGGATAATTTGCCATCTGGAGTTTCTCTGCCTTGCT
A_19_P00324399	LINC01481	101928062	NR_120459	2.3529	9.4637	4.26483	9.60698	8.86659	10.101	8.61753	10.71	552.741	1147.17	309.987	1590.13	P	P	P	P	0	NR_120459	NR_120459	Hs.568059	long intergenic non-protein coding RNA 1481		THC2498136		Homo sapiens long intergenic non-protein coding RNA 1481 (LINC01481), transcript variant 1, long non-coding RNA [NR_120459]	chr12:70636352-70636293	hs|12q15	GGAAACTTAAAGGAGTGAAGTATCTGCTTTCCAGAAAAATCGTTGTCATTCAAAGTGAAA
A_19_P00801917	lnc-FARS2-2			-5.134	10.7687	-5.88153	10.4963	12.0132	9.65316	11.8519	9.29575	5494.65	855.018	2919.84	610.862	P	P	P	P	0	lnc-FARS2-2:1		Hs.679453	lnc-FARS2-2:1		THC2614014		Homo sapiens cDNA clone IMAGE:4523522, partial cds. [BC036859]	chr6:5986231-5986290	hs|6p25.1	AGTACTGGTTGCTAACCCTCCTCCACACTTGGTTTGCAGAGGATATTTCCAGAGTTAGAA
A_19_P00802154	DST	667	NM_001144769	-7.29282	5.95402	-4.43899	6.30936	7.55733	4.69085	7.47543	5.32519	211.457	30.2707	139.793	39.5674	P	P	P	M	0	NM_001144769	NM_001144769	Hs.735651	dystonin	ENST00000370754	THC2611597	GO:0000226(microtubule cytoskeleton organization)|GO:0003779(actin binding)|GO:0005178(integrin binding)|GO:0005509(calcium ion binding)|GO:0005515(protein binding)|GO:0005604(basement membrane)|GO:0005634(nucleus)|GO:0005635(nuclear envelope)|GO:0005737(cytoplasm)|GO:0005789(endoplasmic reticulum membrane)|GO:0005829(cytosol)|GO:0005882(intermediate filament)|GO:0005925(focal adhesion)|GO:000593…	Homo sapiens dystonin (DST), transcript variant 2, mRNA [NM_001144769]	chr6:56765299-56765240	hs|6p12.1	AGGAAACGAAGAATCAAGAAGAGCAGCCGAGTCCAGCCAGAATTTTATCACTCTGTTCAA
A_19_P00802201				-30.8457	8.67868	-53.7207	7.27272	11.4978	6.55079	10.6936	4.94618	3822.08	108.043	1316.64	30.7697	P	P	P	P	0	ENST00000399411				ENST00000399411			CCNB2 pseudogene 1 [Source:HGNC Symbol;Acc:HGNC:50850] [ENST00000399411]	chr7:7949008-7948949	hs|7p21.3	ATTCCTGAAGATCAGCATGATCCCTCAGCTGAACTCAAAAGCCATCAAAGACCTTGCCTT
A_19_P00803019				1.38115	9.1506	-4.01773	9.11117	8.92064	9.3865	10.1694	8.16304	575.899	724.139	920.748	285.42	P	P	P	P	0	ENST00000552334	AK096584	Hs.592473		ENST00000552334	THC2491895		Prader Willi/Angelman region RNA 6 [Source:HGNC Symbol;Acc:HGNC:49129] [ENST00000552334]	chr15:25279318-25279377	hs|15q11.2	TTTCTCATAATTTCCACGTCAACTCCCATGATGATCATGCAGGAAAGCAGCATGATTGCA
A_19_P00803086	lnc-RPRML-3			-1.84265	7.88371	-4.13676	7.51566	8.33693	7.45514	8.60938	6.56088	371.684	199.397	308.716	93.1952	P	P	P	P	0	lnc-RPRML-3:2			lnc-RPRML-3:2				LNCipedia lincRNA (lnc-RPRML-3), lincRNA [lnc-RPRML-3:2]	chr17:45132534-45132475	hs|17q21.32	TTTCTGAAATACAGTCCCGCAGAGGGCAGTCTTGGGAAATTACTGTTCTCACACACTCTT
A_19_P00803685	ANKRD33B	651746	NM_001164440	-17.7106	10.2383	-12.625	10.7486	12.5194	8.37286	12.7322	9.074	7956.8	368.44	5457.96	533.653	P	P	P	P	0	NM_001164440		Hs.26039	ankyrin repeat domain 33B	ENST00000607560	THC2611580		Homo sapiens ankyrin repeat domain 33B (ANKRD33B), mRNA [NM_001164440]	chr5:10657671-10657730	hs|5p15.2	ATATTTTCCTATTCAGACCTCAGGGCTATTTTGGGACCTACAAATAAATGGGATTCCCAG
A_19_P00805452	XLOC_l2_010558			4.24941	7.69058	4.15766	7.66891	6.71743	8.8047	6.7096	8.76537	114.959	489.092	83.8656	429.186	P	P	P	P	0	TCONS_l2_00020391							BROAD Institute lincRNA (XLOC_l2_010558), lincRNA [TCONS_l2_00020391]	chr4:6678056-6678115	hs|4p16.1	TGAAAACACAATTACAGTACAGTGTCCGCAATGCTGGTCTTTGATTCAACGCATAAATTG
A_19_P00807053	LOC100506411	100506411	XR_245779	-5.73995	7.24786	-6.72693	7.6372	8.61718	6.09614	9.13496	6.38502	458.883	80.0394	442.852	82.8813	P	P	P	P	0	ENST00000554032	XR_245779	Hs.200260	uncharacterized LOC100506411	ENST00000554032	THC2562982		PREDICTED: Homo sapiens uncharacterized LOC100506411 (LOC100506411), transcript variant X2, ncRNA [XR_245779]	chr14:71281913-71281972	hs|14q24.2	CCTTTCCGTCCAGGACCTCAAACAGATCCAATCACAAGAAGAGAGATTTCAGGAAAGAGA
A_19_P00807384	LOC101927151	101927151	NR_110687	-1.87783	9.45285	-5.05877	8.59516	9.91831	9.00924	9.84374	7.50495	1198.91	555.59	734.111	181.089	P	P	P	P	0	NR_110687	NR_110687		uncharacterized LOC101927151	ENST00000586784	THC2516977		Homo sapiens uncharacterized LOC101927151 (LOC101927151), transcript variant 1, long non-coding RNA [NR_110687]	chr19:28288874-28288933	hs|19q11	GTGTGGAAAAACAAGGCCAACACACACATCTCTGCACAGATACATCTCCCATAAAGAAAC
A_19_P00808348	LOC101927151	101927151		-2.13217	9.54492	-5.50602	8.68679	10.1067	9.01437	10.004	7.54301	1375.25	557.868	819.611	185.797	P	P	P	P	0	ENST00000586784			uncharacterized LOC101927151	ENST00000586784	THC2525976			chr19:28289104-28289163	hs|19q11	AATTAACAGTGCTTAAGTGTGAGGCTCCCTCAGAACATCAGAGATATCCTCACTCCCTCA
A_19_P00809076	KANSL1-AS1	644246	NR_034172	4.18192	8.83809	2.20406	9.50617	7.86607	9.93023	8.95317	10.0933	261.881	1029.69	388.581	1048.7	P	P	P	P	0	NR_034172	NR_034172	Hs.644600	KANSL1 antisense RNA 1		THC2661672		Homo sapiens KANSL1 antisense RNA 1 (KANSL1-AS1), long non-coding RNA [NR_034172]	chr17:44273754-44273813	hs|17q21.31	TAGAAGCCCCCTGGACAGCCTCCAAAAGAGAACTGTGAGAAAAGGTTCTTCAATCCTAAA
A_19_P00810205				-12.9271	8.43881	-4.33286	8.0737	10.4846	6.79223	9.20035	7.08502	1807.01	128.676	462.621	134.415	P	P	P	P	0	ENST00000399411				ENST00000399411			CCNB2 pseudogene 1 [Source:HGNC Symbol;Acc:HGNC:50850] [ENST00000399411]	chr7:7949226-7949167	hs|7p21.3	ATGATGCATTATCATCCTTCTAAGGCAGCAACAGCTGCTTCCTGCTTGTCTCAGAAGGTT
A_19_P00810361				-4.63142	9.83491	-3.73417	9.76434	11.0026	8.79114	10.7609	8.86009	2641.19	483.777	1376.88	460.819	P	P	P	P	0	ENST00000515142		Hs.420696		ENST00000515142	THC2461864		Homo sapiens chromosome 21 unknown mRNA. [AF239727]	chr5:66986051-66985992	hs|5q13.1	TGATTCCAAGAACAAGTATTTGCTTCCAGTATGAAGTGTCAGCAGTTCACAATCTTCAAC
A_19_P00810751	lnc-GBP5-2			6.6182	6.05101	1.30479	6.35845	4.83945	7.56589	6.16944	6.55325	30.5435	215.287	57.1943	92.8221	P	P	P	P	0	lnc-GBP5-2:3			lnc-GBP5-2:3		THC2770336		LNCipedia lincRNA (lnc-GBP5-2), lincRNA [lnc-GBP5-2:3]	chr1:90091656-90091597	hs|1p22.2	GCATGTGTTAACCTATTAATTAAATCTACAAATGACTGGCTGTACCCATGAAGTGAGTTA
A_19_P00811048	ZEB1-AS1	220930	NR_024284	-4.12539	6.39635	-1.98338	5.66285	7.49979	5.45526	6.17833	5.19037	202.942	52.0279	57.6268	35.9968	P	P	P	P	0	NR_024284	NR_024284	Hs.372654	ZEB1 antisense RNA 1		THC2492033		Homo sapiens ZEB1 antisense RNA 1 (ZEB1-AS1), long non-coding RNA [NR_024284]	chr10:31605526-31605467	hs|10p11.22	TATTGATACCTGGACTGGAAAGAAAACAGACAAAAGTAAATCTCAGAATAAATTACTGCT
A_19_P00811264	lnc-TSHZ1-1			-4.22085	6.63566	-2.84869	6.49334	7.75524	5.6777	7.29225	5.78195	242.159	60.7938	123.405	54.1674	P	P	P	P	0	lnc-TSHZ1-1:1			lnc-TSHZ1-1:1				LNCipedia lincRNA (lnc-TSHZ1-1), lincRNA [lnc-TSHZ1-1:1]	chr18:72882441-72882500	hs|18q22.3	TTGGCCTGATGTGCCTGGCACTCGGTTTCTTGCTCCCCCTGAATAGTCCTGATCATGCCA
A_19_P00812310	lnc-ITSN1-2			4.34668	7.38992	2.1412	5.90242	6.40559	8.52551	5.37871	6.47713	92.6442	406.466	33.0432	88.2983	P	P	P	P	0	lnc-ITSN1-2:5			lnc-ITSN1-2:5				LNCipedia lincRNA (lnc-ITSN1-2), lincRNA [lnc-ITSN1-2:5]	chr21:35350604-35350663	hs|21q22.11	GGAGGGAATTGGATTTTTGGAAAAGATTGTGGCAAAATACAAAATATAAAATACAAAAAT
A_19_P00813085	lnc-SNURF-1			1.14774	7.62438	-4.65484	7.5775	7.52563	7.72442	8.76764	6.54891	206.545	239.875	343.099	92.5884	P	P	P	P	0	lnc-SNURF-1:8			lnc-SNURF-1:8		THC2528229		LNCipedia lincRNA (lnc-SNURF-1), lincRNA [lnc-SNURF-1:8]	chr15:25267574-25267633	hs|15q11.2	AGTCACTCAGTGATATGAAGCAAGCTGTGGTCATTTATCTACTACCTTCCATACCTACTT
A_21_P0000015	PARP9	83666	NM_001146106	-1.21624	8.87149	4.27504	7.59325	9.01383	8.73141	6.61725	8.71319	617.449	463.562	78.7551	413.643	P	P	P	P	0	NM_001146106	NM_001146106	Hs.518200	poly (ADP-ribose) polymerase family, member 9		THC2646191	GO:0003950(NAD+ ADP-ribosyltransferase activity)|GO:0005515(protein binding)|GO:0005634(nucleus)|GO:0005737(cytoplasm)|GO:0005829(cytosol)|GO:0006302(double-strand break repair)|GO:0016020(membrane)|GO:0016477(cell migration)|GO:0060330(regulation of response to interferon-gamma)	Homo sapiens poly (ADP-ribose) polymerase family, member 9 (PARP9), transcript variant 6, mRNA [NM_001146106]	chr3:122250748-122250689	hs|3q21.1	TTTCCCACCAGCTGGAAGAAAGAACTTTCATTTGTCTTGAAATGAGAAAAATGTTCTTAG
A_21_P0000019	KDM4C	23081	NM_001146695	3.01939	7.18991	6.61103	7.77864	6.43684	8.0311	6.53462	9.25949	95.0388	293.815	74.1857	595.495	P	P	P	P	0	NM_001146695	NM_001146695	Hs.709425	lysine (K)-specific demethylase 4C			GO:0000790(nuclear chromatin)|GO:0005654(nucleoplasm)|GO:0006325(chromatin organization)|GO:0006351(transcription, DNA-dependent)|GO:0006357(regulation of transcription from RNA polymerase II promoter)|GO:0008270(zinc ion binding)|GO:0008284(positive regulation of cell proliferation)|GO:0019899(enzyme binding)|GO:0032454(histone demethylase activity (H3-K9 specific))|GO:0033169(histone H3-K9 deme…	Homo sapiens lysine (K)-specific demethylase 4C (KDM4C), transcript variant 3, mRNA [NM_001146695]	chr9:7077209-7077268	hs|9p24.1	GCATTCAAGATGCAACACCTACAATATGGTGAATTAAAGATGCCATTTGCATGGATAAAA
A_21_P0000023	RIOK2	55781	NM_001159749	1.42678	6.35245	8.45886	7.17531	6.10124	6.61401	5.79853	8.87899	74.3243	113.24	44.4348	467.351	P	P	P	P	0	NM_001159749	NM_001159749	Hs.27021	RIO kinase 2			GO:0004674(protein serine/threonine kinase activity)|GO:0005524(ATP binding)|GO:0006468(protein phosphorylation)	Homo sapiens RIO kinase 2 (RIOK2), transcript variant 2, mRNA [NM_001159749]	chr5:96502593-96502534	hs|5q15	GCAGGTCTCTGGATACATTGATCAGGTTTTAGATGGATGAGTTATTCCTCATATATTTTC
A_21_P0000037	ZSCAN12	9753	NM_001163391	-8.0779	6.185	-3.79402	5.9553	7.87294	4.85896	6.99434	5.07061	263.465	34.1615	101.072	33.3821	P	P	P	P	0	NM_001163391	NM_001163391	Hs.134816	zinc finger and SCAN domain containing 12		THC2629453	GO:0003677(DNA binding)|GO:0003700(sequence-specific DNA binding transcription factor activity)|GO:0005634(nucleus)|GO:0006351(transcription, DNA-dependent)|GO:0006355(regulation of transcription, DNA-dependent)|GO:0046872(metal ion binding)	Homo sapiens zinc finger and SCAN domain containing 12 (ZSCAN12), transcript variant 1, mRNA [NM_001163391]	chr6:28356786-28356727	hs|6p22.1	ACCAAAACTGGTTGACTCTAACCTTGCCTTGCTGAGTAAAAATTCTGCTTTGGATGAGAA
A_21_P0000040	ZBTB24	9841	NM_001164313	1.96591	8.96639	10.4446	9.99811	8.49204	9.46724	8.44798	11.8327	415.671	760.311	273.776	3466.02	P	P	P	P	0	NM_001164313	NM_001164313	Hs.409876	zinc finger and BTB domain containing 24		THC2479024	GO:0002244(hemopoietic progenitor cell differentiation)|GO:0003677(DNA binding)|GO:0005515(protein binding)|GO:0005634(nucleus)|GO:0006351(transcription, DNA-dependent)|GO:0006355(regulation of transcription, DNA-dependent)|GO:0046872(metal ion binding)	Homo sapiens zinc finger and BTB domain containing 24 (ZBTB24), transcript variant 2, mRNA [NM_001164313]	chr6:109802280-109802221	hs|6q21	CAGGTAATGATGTTTTCAAAGCTGATTGCAGTGTGTTGCAGAATTGGGAGTAGTGATGAT
A_21_P0000057	RGS9	8787	NM_001165933	9.88833	6.00954	1.20288	7.26404	4.57984	7.88557	7.13202	7.39851	25.069	266.532	110.913	168.393	P	P	P	P	0	NM_001165933	NM_001165933	Hs.664380	regulator of G-protein signaling 9	ENST00000581175	NP233996	GO:0004871(signal transducer activity)|GO:0005096(GTPase activator activity)|GO:0005634(nucleus)|GO:0005737(cytoplasm)|GO:0005834(heterotrimeric G-protein complex)|GO:0005886(plasma membrane)|GO:0007212(dopamine receptor signaling pathway)|GO:0007399(nervous system development)|GO:0007601(visual perception)|GO:0007603(phototransduction, visible light)|GO:0008277(regulation of G-protein coupled re…	Homo sapiens regulator of G-protein signaling 9 (RGS9), transcript variant 3, mRNA [NM_001165933]	chr17:63204068-63206607	hs|17q24.1	CGATCTATAAGGACATGCTGGCCAAAGCTATTGAACCTCAGGAAACCACCAAGAAAAGCT
A_21_P0000064	HPSE	10855	NM_006665	9.48468	6.07554	8.15124	6.49158	4.66573	7.91133	5.15217	8.17919	26.6857	270.387	28.0752	289.101	P	P	P	P	0	NM_006665	NM_006665	Hs.44227	heparanase	ENST00000405413	THC2519115	GO:0004566(beta-glucuronidase activity)|GO:0005515(protein binding)|GO:0005576(extracellular region)|GO:0005634(nucleus)|GO:0005654(nucleoplasm)|GO:0005764(lysosome)|GO:0005765(lysosomal membrane)|GO:0005975(carbohydrate metabolic process)|GO:0006027(glycosaminoglycan catabolic process)|GO:0006029(proteoglycan metabolic process)|GO:0007160(cell-matrix adhesion)|GO:0009405(pathogenesis)|GO:0010575…	Homo sapiens heparanase (HPSE), transcript variant 1, mRNA [NM_006665]	chr4:84214275-84214216	hs|4q21.23	CTGCAGTTCTGCGCTTTTTACCAGTGAAAAAATGTAATTATTTTCCCCTCTTAAGGATTA
A_21_P0000075	SAP25	100316904	NM_001168682	10.2124	13.1838	2.00579	13.5318	11.6138	14.9661	13.039	14.0431	4135.39	30388.2	6823.46	15355.1	P	P	P	P	0	NM_001168682	NM_001168682	Hs.633863	Sin3A-associated protein, 25kDa	ENST00000538735	THC2518565	GO:0005634(nucleus)|GO:0005737(cytoplasm)|GO:0006351(transcription, DNA-dependent)|GO:0006355(regulation of transcription, DNA-dependent)	Homo sapiens Sin3A-associated protein, 25kDa (SAP25), mRNA [NM_001168682]	chr7:100169908-100169849	hs|7q22.1	CTTCTCAGGGCAGAGTGGGCTGGTTGTGTTGACAATAAAACAGTGTTGGTTTGCAAAAAA
A_21_P0000089	ZFYVE28	57732	NM_001172660	6.90111	6.33355	6.21795	6.44382	5.0916	7.87843	5.25906	7.8955	36.7291	265.74	30.4536	238.016	P	P	P	P	0	NM_001172660	NM_001172660	Hs.292056	zinc finger, FYVE domain containing 28	ENST00000515312	THC2605406	GO:0005515(protein binding)|GO:0005829(cytosol)|GO:0007175(negative regulation of epidermal growth factor-activated receptor activity)|GO:0031901(early endosome membrane)|GO:0032266(phosphatidylinositol-3-phosphate binding)|GO:0042059(negative regulation of epidermal growth factor receptor signaling pathway)|GO:0046872(metal ion binding)	Homo sapiens zinc finger, FYVE domain containing 28 (ZFYVE28), transcript variant 6, mRNA [NM_001172660]	chr4:2337505-2337446	hs|4p16.3	TACCTGACTCAGGACATGATTGATGACTACGAGCCGGCCCTCATGTTCAGCATCCCCAGG
A_21_P0000094	CD33	945	NM_001177608	8.15469	7.06934	8.37306	6.91043	5.71579	8.74342	5.54552	8.61128	56.6545	466.992	37.1594	386.337	P	P	P	P	0	NM_001177608	NM_001177608	Hs.83731	CD33 molecule	ENST00000391796	NP1178007	GO:0004872(receptor activity)|GO:0005515(protein binding)|GO:0005886(plasma membrane)|GO:0005887(integral to plasma membrane)|GO:0007155(cell adhesion)|GO:0007165(signal transduction)|GO:0007267(cell-cell signaling)|GO:0008285(negative regulation of cell proliferation)|GO:0009897(external side of plasma membrane)|GO:0030246(carbohydrate binding)|GO:0070062(extracellular vesicular exosome)	Homo sapiens CD33 molecule (CD33), transcript variant 3, mRNA [NM_001177608]	chr19:51728805-51729068	hs|19q13.41	AAGTACCAAATACAGTTACAAATCTCCCCAGCTCTCTGTGCATGTGACAGACTTGACCCA
A_21_P0000097	PAFAH1B2	5049	NM_001184746	1.72812	5.75843	6.69043	6.12182	5.37733	6.16653	4.90243	7.64452	44.652	83.9451	23.9196	199.821	P	P	P	P	0	NM_001184746	NM_001184746	Hs.728488	platelet-activating factor acetylhydrolase 1b, catalytic subunit 2 (30kDa)	ENST00000419197	THC2503810	GO:0003847(1-alkyl-2-acetylglycerophosphocholine esterase activity)|GO:0005730(nucleolus)|GO:0005737(cytoplasm)|GO:0005829(cytosol)|GO:0005886(plasma membrane)|GO:0006629(lipid metabolic process)|GO:0007283(spermatogenesis)|GO:0007420(brain development)|GO:0016042(lipid catabolic process)|GO:0016239(positive regulation of macroautophagy)|GO:0042803(protein homodimerization activity)|GO:0046982(pr…	Homo sapiens platelet-activating factor acetylhydrolase 1b, catalytic subunit 2 (30kDa) (PAFAH1B2), transcript variant 2, mRNA [NM_001184746]	chr11:117046795-117046854	hs|11q23.3	GAAACAGTACTGGACCAAGGTGCAAACTTGAGTCTAGTGAGGTACTAATGGGCTGAAGTT
A_21_P0000121	C19orf81	342918	NM_001195076	1.76309	5.79087	-7.83692	7.03083	5.39624	6.21435	8.67112	5.70083	45.1982	86.4469	320.564	51.3273	P	P	P	P	0	NM_001195076	NM_001195076	Hs.531650	chromosome 19 open reading frame 81	ENST00000425202			Homo sapiens chromosome 19 open reading frame 81 (C19orf81), mRNA [NM_001195076]	chr19:51162508-51162567	hs|19q13.33	CGGCTCGAGGGGGTGGATACTGTGAGTTTAATTATAAAGAATGACCTGGTACAAAAGCCA
A_21_P0000142	RNF103	7844	NM_001198952	1.76807	8.41799	6.08043	8.73683	8.01693	8.83911	7.53124	10.1354	291.797	498.699	145.744	1080.61	P	P	P	P	0	NM_001198952	NM_001198952	Hs.469199	ring finger protein 103	ENST00000465629	THC2605002	GO:0004842(ubiquitin-protein ligase activity)|GO:0005515(protein binding)|GO:0005783(endoplasmic reticulum)|GO:0005789(endoplasmic reticulum membrane)|GO:0007417(central nervous system development)|GO:0008270(zinc ion binding)|GO:0016021(integral to membrane)|GO:0016567(protein ubiquitination)|GO:0016874(ligase activity)|GO:0030433(ER-associated protein catabolic process)	Homo sapiens ring finger protein 103 (RNF103), transcript variant 3, mRNA [NM_001198952]	chr2:86843657-86843598	hs|2p11.2	CTGCTATGGAGGTGAAGCACATAGCAAGCCACTTTATCTTATATTTTGTATTGGTAAAAA
A_21_P0000147	PGM3	5238	NM_001199919	-4.45631	8.10716	-3.00199	7.76572	9.25643	7.10058	8.59906	7.01314	736.293	157.185	306.752	127.964	P	P	P	P	0	NM_001199919	NM_001199919	Hs.661665	phosphoglucomutase 3	ENST00000504780	THC2602680	GO:0000287(magnesium ion binding)|GO:0004610(phosphoacetylglucosamine mutase activity)|GO:0004614(phosphoglucomutase activity)|GO:0005575(cellular_component)|GO:0005829(cytosol)|GO:0006041(glucosamine metabolic process)|GO:0006048(UDP-N-acetylglucosamine biosynthetic process)|GO:0006487(protein N-linked glycosylation)|GO:0006488(dolichol-linked oligosaccharide biosynthetic process)|GO:0006493(pro…	Homo sapiens phosphoglucomutase 3 (PGM3), transcript variant 4, mRNA [NM_001199919]	chr6:83880033-83878993	hs|6q14.1	AGACTCACAAGAAAGTGCAGATCACCTTGCACATGAAGTGAGCTTGGCAGTATTTCAGCT
A_21_P0000171	IL6R	3570	NM_001206866	5.19793	7.43743	4.67483	7.17834	6.3429	8.72084	6.15157	8.37648	88.8823	460.037	56.5477	330.458	P	P	P	P	0	NM_001206866	NM_001206866	Hs.135087	interleukin 6 receptor	ENST00000622330	NP1138424	GO:0002384(hepatic immune response)|GO:0002446(neutrophil mediated immunity)|GO:0002548(monocyte chemotaxis)|GO:0002690(positive regulation of leukocyte chemotaxis)|GO:0004897(ciliary neurotrophic factor receptor activity)|GO:0004915(interleukin-6 receptor activity)|GO:0005138(interleukin-6 receptor binding)|GO:0005515(protein binding)|GO:0005576(extracellular region)|GO:0005615(extracellular spa…	Homo sapiens interleukin 6 receptor (IL6R), transcript variant 3, mRNA [NM_001206866]	chr1:154407568-154407627	hs|1q21.3	TCTACAGACTACGGTTTGAGCTCAGATATCGGGCTGAACGGTCAAAGACATTCACAACAT
A_21_P0000177	C19orf83	100287177		-4.01151	8.22467	-6.04252	9.4749	9.28756	7.28342	10.8609	8.26576	752.758	177.811	1472.38	307.255	P	P	P	P	0	ENST00000591087	BC007358	Hs.668611	chromosome 19 open reading frame 83	ENST00000591087	THC2496189		chromosome 19 open reading frame 83 [Source:HGNC Symbol;Acc:HGNC:48331] [ENST00000591087]	chr19:46145874-46145933	hs|19q13.32	TTTTCTAAGAGTCTGTGAACCCAGGAGCCTCTCGCTCTGGCTTTAAGATGCTATGACTAA
A_21_P0000186	ZNF561-AS1	284385	NR_122038	-2.48513	5.59219	-4.55628	5.23641	6.28727	4.97395	6.44339	4.25553	85.0682	37.1117	69.4683	19.9245	P	P	P	P	0	NR_122038			ZNF561 antisense RNA 1 (head to head)		THC2494850		Homo sapiens ZNF561 antisense RNA 1 (head to head) (ZNF561-AS1), long non-coding RNA [NR_122038]	chr19:9745092-9745151	hs|19p13.2	GACAAAATGAGTTGCTCTACAAAGGTCCAACTTCGTTGTCCTTTGTTCTGTAACCTTTGT
A_21_P0000197	HIST1H2AG	8969	NM_021064	-5.66004	10.0095	-3.63902	9.31572	11.3377	8.83693	10.294	8.43042	3360.2	498.158	1001.45	342.884	P	P	P	P	0	NM_021064	NM_021064	Hs.51011	histone cluster 1, H2ag	ENST00000359193	THC2477745	GO:0000786(nucleosome)|GO:0003677(DNA binding)|GO:0005515(protein binding)|GO:0005634(nucleus)|GO:0008150(biological_process)|GO:0019899(enzyme binding)|GO:0046982(protein heterodimerization activity)|GO:0070062(extracellular vesicular exosome)	Homo sapiens histone cluster 1, H2ag (HIST1H2AG), mRNA [NM_021064]	chr6:27101247-27101306	hs|6p22.1	TCTGTACTAGTTTGTGGCAGCTCAAGTAAAATCGAGTCCAAACCAACGGCTCTTTTCAGG
A_21_P0000219	SNORD34	26817	NR_000019	3.10206	9.54304	4.85682	9.13052	8.7613	10.3945	8.06141	10.3414	513.059	1404.78	211.078	1243.36	P	P	P	P	0	NR_000019	NR_000019		small nucleolar RNA, C/D box 34	ENST00000472481	NP1210591		Homo sapiens small nucleolar RNA, C/D box 34 (SNORD34), small nucleolar RNA [NR_000019]	chr19:49994170-49994229	hs|19q13.33	TGATGTTCCGCAACTACCTACATTGTTTGATCCTCATGAAAGCAGCACTGGCTGAGACGC
A_21_P0000221	SNORD32A	26819	NR_000021	2.80507	9.40971	4.15947	9.00213	8.69506	10.1831	8.03246	10.0889	488.406	1208.48	206.406	1045.36	P	P	P	P	0	NR_000021	NR_000021		small nucleolar RNA, C/D box 32A	ENST00000486930	NP1210591		Homo sapiens small nucleolar RNA, C/D box 32A (SNORD32A), small nucleolar RNA [NR_000021]	chr19:49993245-49993304	hs|19q13.33	ACCATCTTTCGTTTGAGTCTCACGGCCATGAGATCAACCCCATGCACCGCTCTGAGACCT
A_21_P0000222	SNORD46	94161	NR_000024	5.59305	10.6709	6.17896	10.714	9.50109	11.9847	9.48053	12.1079	879.155	4032.6	563.034	4173.92	P	P	P	P	0	NR_000024	NR_000024		small nucleolar RNA, C/D box 46		THC2511401		Homo sapiens small nucleolar RNA, C/D box 46 (SNORD46), small nucleolar RNA [NR_000024]	chr1:45242202-45242261	hs|1p34.1	CCGTCTTGGTCACCTGTGTGCCACTTGCCAATGCAAGGACTTGTCATAGTTACACTGACT
A_21_P0000223	SNORD15B	114599	NR_000025	3.1338	11.2059	4.48407	11.2057	10.4122	12.0601	10.1754	12.3402	1715.57	4246.2	923.229	4857.02	P	P	P	P	0	NR_000025	NR_000025	Hs.689080	small nucleolar RNA, C/D box 15B		THC2679711		Homo sapiens small nucleolar RNA, C/D box 15B (SNORD15B), small nucleolar RNA [NR_000025]	chr11:75115551-75115610	hs|11q13.4	AGTTCCTTTGGCAGAAGTGTCCTATTTATTGATCGATTTAGAGGCATTTGTCTGAGAAGG
A_21_P0000225	SNORD83B	116938	NR_000028	4.139	12.6871	3.88412	12.8518	11.7037	13.753	11.9102	13.8678	4421.9	13205.1	3045.74	13729.2	P	P	P	P	0	NR_000028	NR_000028	Hs.119598	small nucleolar RNA, C/D box 83B	ENST00000467105	THC2579833		Homo sapiens small nucleolar RNA, C/D box 83B (SNORD83B), small nucleolar RNA [NR_000028]	chr22:39709883-39709824	hs|22q13.1	GGCACAGCGCCCGAGACAGACTGCGGAACCGTTCCTTGTTGCCTTCCTTCTGAGAACAGC
A_21_P0000227	SNORD35B	84546	NR_001285	2.23681	9.40652	6.2672	9.50562	8.84371	10.0052	8.27346	10.9213	544.856	1080.77	243.057	1846.47	P	P	P	P	0	NR_001285	NR_001285		small nucleolar RNA, C/D box 35B	ENST00000599167	THC2506409		Homo sapiens small nucleolar RNA, C/D box 35B (SNORD35B), small nucleolar RNA [NR_001285]	chr19:50001004-50001063	hs|19q13.33	TCTTCAGATGCCCACGTGGGCACTGCTGAGAAAGCCACTTGGTAAAACTGATGCCGGAAA
A_21_P0000230	SNORD107	91380	NR_001293	10.0018	6.80684	7.08791	6.96096	5.3455	8.66769	5.69018	8.51554	43.7153	446.484	40.9771	363.484	P	P	P	P	0	NR_001293	NR_001293	Hs.733072	small nucleolar RNA, C/D box 107	ENST00000551312	THC2527316		Homo sapiens small nucleolar RNA, C/D box 107 (SNORD107), small nucleolar RNA [NR_001293]	chr15:25227156-25227215	hs|15q11.2	AGGACCTTGTCTGAACATAATGATTTCAAAATTTGAGCTTAAAAATGACACTCTGAAATC
A_21_P0000244	SNORD16	595097	NR_002440	2.97207	11.6257	4.77162	11.6475	10.8665	12.4379	10.5747	12.8292	2393.03	5421.62	1212.02	6801.48	P	P	P	P	0	NR_002440	NR_002440	Hs.739034	small nucleolar RNA, C/D box 16	ENST00000561775	THC2501670		Homo sapiens small nucleolar RNA, C/D box 16 (SNORD16), small nucleolar RNA [NR_002440]	chr15:66795208-66795149	hs|15q22.31	GACAGTTGCCTGCTGTCAGTAAGCTGGTACAGAAGGTTGACGAAAATTCTTACTGAGCAA
A_21_P0000247	SNORD18C	595100	NR_002443	1.59754	7.88064	4.367	7.42401	7.54996	8.22581	6.43645	8.5631	210.143	333.85	69.2628	375.019	P	P	P	P	0	NR_002443	NR_002443	Hs.186350	small nucleolar RNA, C/D box 18C	ENST00000566039	THC2565461		Homo sapiens small nucleolar RNA, C/D box 18C (SNORD18C), small nucleolar RNA [NR_002443]	chr15:66793649-66793590	hs|15q22.31	GATGAGATTCCACTTAAGGTCCGTGTTTCTGAAACAAATGATTTTGTGGAAGTTCTGATT
A_21_P0000252	SNORD68	606500	NR_002450	4.94943	11.8628	6.64362	11.9028	10.7651	13.0724	10.6149	13.3469	2221.5	8391.8	1246.15	9744.45	P	P	P	P	0	NR_002450	NR_002450		small nucleolar RNA, C/D box 68	ENST00000487034	THC2520509		Homo sapiens small nucleolar RNA, C/D box 68 (SNORD68), small nucleolar RNA [NR_002450]	chr16:89627850-89627909	hs|16q24.3	TTCTCCGGAATCGCTGTACGGCCTTGATGAAAGCACATTTGAACCCTTTTCCATCTGATT
A_21_P0000253	SNORD29	9297	NR_002559	2.64074	9.03908	5.59175	8.75746	8.36571	9.76665	7.60339	10.0867	379.413	923.915	152.353	1043.32	P	P	P	P	0	NR_002559	NR_002559		small nucleolar RNA, C/D box 29		THC2518984		Homo sapiens small nucleolar RNA, C/D box 29 (SNORD29), small nucleolar RNA [NR_002559]	chr11:62621435-62621376	hs|11q12.3	ATGATGAATCAAACTAGCTCACTATGACCGACAGTGAAAATACATGAACACCTGAGAAAC
A_21_P0000254	SNORD31	9298	NR_002560	3.30339	9.22719	6.42537	9.0539	8.40539	10.1293	7.81091	10.4947	390.21	1168.95	177.127	1380.92	P	P	P	P	0	NR_002560	NR_002560		small nucleolar RNA, C/D box 31		THC2522481		Homo sapiens small nucleolar RNA, C/D box 31 (SNORD31), small nucleolar RNA [NR_002560]	chr11:62620857-62620798	hs|11q12.3	ATGAGTTGAATACCGCCCCAGTCTGATCAATGTGTGACTGAAAGGTATTTTCTGAGCTGT
A_21_P0000257	SNORD27	9301	NR_002563	2.11521	10.4342	5.19755	9.98717	9.90776	10.9886	8.86877	11.2466	1191.83	2105.53	365.744	2321.9	P	P	P	P	0	NR_002563	NR_002563		small nucleolar RNA, C/D box 27		THC2538319		Homo sapiens small nucleolar RNA, C/D box 27 (SNORD27), small nucleolar RNA [NR_002563]	chr11:62622543-62622484	hs|11q12.3	ACACAAAATGACAAGCATATGGCTGAACTTTCAAGTGATGTCATCTTACTACTGAGAAGT
A_21_P0000275	SNORD96A	619571	NR_002592	3.81144	9.45197	6.85474	9.6303	8.53595	10.4663	8.34134	11.1184	430.018	1473.18	254.668	2122.64	P	P	P	P	0	NR_002592	NR_002592		small nucleolar RNA, C/D box 96A	ENST00000502890	THC2548167		Homo sapiens small nucleolar RNA, C/D box 96A (SNORD96A), small nucleolar RNA [NR_002592]	chr5:180668877-180668818	hs|5q35.3	AGATGGCATTGTCAGCCAATCCCCAAGTGGGAGTGAGGACATGTCCTGCAATTCTGAAGG
A_21_P0000276	SNORD87	641648	NR_002598	2.78992	9.77341	5.2808	9.70315	9.06128	10.5415	8.57674	10.9775	638.436	1550.62	302.014	1920.97	P	P	P	P	0	NR_002598	NR_002598		small nucleolar RNA, C/D box 87		THC2577803		Homo sapiens small nucleolar RNA, C/D box 87 (SNORD87), small nucleolar RNA [NR_002598]	chr8:67834768-67834709	hs|8q13.1	TTACTTTTTGCCGTTTACCCAGCTGAGGTTGTCTTTGAAGAAATAATTTTAAGACTGAGA
A_21_P0000278	SNORD10	652966	NR_002604	4.19968	11.4541	3.69368	11.6339	10.4656	12.5359	10.7295	12.6146	1781.75	5842.33	1353.87	5851.65	P	P	P	P	0	NR_002604	NR_002604	Hs.742526	small nucleolar RNA, C/D box 10	ENST00000584901	THC2553193		Homo sapiens small nucleolar RNA, C/D box 10 (SNORD10), small nucleolar RNA [NR_002604]	chr17:7480217-7480276	hs|17p13.1	GTCTGCCTGGCGGGAAGGTCCTGGGCAAAGGATCAGTCTTTGTACTCTGAGAGCAGACTA
A_21_P0000279	SNORD61	26787	NR_002735	6.3179	5.90912	1.59765	6.95944	4.72717	7.38661	6.62966	7.30561	28.0208	190.994	79.3652	158.16	P	P	P	P	0	NR_002735	NR_002735		small nucleolar RNA, C/D box 61	ENST00000565907	THC2659280		Homo sapiens small nucleolar RNA, C/D box 61 (SNORD61), small nucleolar RNA [NR_002735]	chrX:135961417-135961358	hs|Xq26.3	TGATTGCATTGATCGTCTGACATGATAATGTATTTTTGTCCTCTAAGAAGTTCTGAGCTT
A_21_P0000281	SNORD59A	26789	NR_002737	3.7027	5.95762	4.34986	6.28711	5.08771	6.97628	5.31544	7.43641	36.6585	145.082	31.7003	172.556	P	P	P	P	0	NR_002737	NR_002737		small nucleolar RNA, C/D box 59A				Homo sapiens small nucleolar RNA, C/D box 59A (SNORD59A), small nucleolar RNA [NR_002737]	chr12:57038870-57038811	hs|12q13.3	TTATCAAAATGACTTTCGTTCTTCTGAGTTTGCTGAAGCCACATTTAGGTACTGAGAAGG
A_21_P0000284	SNORD52	26797	NR_002742	2.47106	10.344	4.13499	10.7341	9.71204	11.0172	9.75887	11.8068	1032.41	2138.18	692.151	3406.29	P	P	P	P	0	NR_002742	NR_002742		small nucleolar RNA, C/D box 52	ENST00000395788	THC2502548		Homo sapiens small nucleolar RNA, C/D box 52 (SNORD52), small nucleolar RNA [NR_002742]	chr6:31804857-31804916	hs|6p21.33	ATGATGATTTCACAGACTAGAGTCTCCGATGCTGGTCATGATGTCAAAACTAAGTTCTGA
A_21_P0000295	SNORA67	26781	NR_002912	-6.94919	11.7757	-1.27698	11.2633	13.2569	10.4601	11.4411	11.0883	13287.8	1467.64	2193.53	2082.63	P	P	P	P	0	NR_002912	NR_002912	Hs.129673	small nucleolar RNA, H/ACA box 67	ENST00000396527	THC2515047		Homo sapiens small nucleolar RNA, H/ACA box 67 (SNORA67), small nucleolar RNA [NR_002912]	chr17:7481350-7481409	hs|17p13.1	CTAAGGCCTTTGGGGAACTGGGATGCTTATTTCCTCTGCCTTCCTTGGCTGCCCACATGG
A_21_P0000297	SNORD62A	26786	NR_002914	5.99948	8.23492	7.52419	8.61469	7.04331	9.62814	7.28106	10.1926	146.692	839.242	122.545	1126.94	P	P	P	P	0	NR_002914	NR_002914		small nucleolar RNA, C/D box 62A		THC2565167		Homo sapiens small nucleolar RNA, C/D box 62A (SNORD62A), small nucleolar RNA [NR_002914]	chr9:134365882-134365941	hs|9q34.13	TGTAATTCCAATAGATCCTTCTGACCCTCCACTGTGGACTCAATAGCAGGGAGATGAAGA
A_21_P0000298	SNORD8	319103	NR_002916	4.51896	9.29842	5.03353	9.47497	8.27386	10.4498	8.38064	10.7122	354.712	1457.87	261.958	1593	P	P	P	P	0	NR_002916	NR_002916	Hs.680078	small nucleolar RNA, C/D box 8		THC2756391		Homo sapiens small nucleolar RNA, C/D box 8 (SNORD8), small nucleolar RNA [NR_002916]	chr14:21865511-21865452	hs|14q11.2	GTTGCCCTGGTTTGGGTGCCAGTGAGTTTAACAAAACTTCTCACATGAAGATCTGAGGGG
A_21_P0000299	SNORA19	641451	NR_002917	2.44521	11.1763	4.14739	11.2764	10.5499	11.8399	10.2969	12.3491	1899.32	3668.69	1003.79	4901.4	P	P	P	P	0	NR_002917	NR_002917	Hs.688653	small nucleolar RNA, H/ACA box 19		THC2752844		Homo sapiens small nucleolar RNA, H/ACA box 19 (SNORA19), small nucleolar RNA [NR_002917]	chr10:120819582-120819523	hs|10q26.11	TGAAGGCTAATTAGCAGTATAACTATAAATAGTAATGCTGCCAGTCTCCTTCAGACAAAA
A_21_P0000309	SNORA11	677799	NR_002953	7.6476	7.41312	7.83762	7.70923	6.08948	9.02448	6.36578	9.3362	73.7198	562.347	66.0475	626.489	P	P	P	P	0	NR_002953	NR_002953	Hs.679783	small nucleolar RNA, H/ACA box 11		THC2547106		Homo sapiens small nucleolar RNA, H/ACA box 11 (SNORA11), small nucleolar RNA [NR_002953]	chrX:54840874-54840933	hs|Xp11.21	TCATTGTGATGAGGGCGTCAAACTTGTGGCTTCCCTATGAACAAACGTCCCCCAACACCT
A_21_P0000310	SNORA12	677800	NR_002954	5.32768	11.6639	9.59175	11.3173	10.5194	12.9329	9.80334	13.0651	1857.17	7645.02	712.705	7927.6	P	P	P	P	0	NR_002954	NR_002954	Hs.662165	small nucleolar RNA, H/ACA box 12		THC2764455		Homo sapiens small nucleolar RNA, H/ACA box 12 (SNORA12), small nucleolar RNA [NR_002954]	chr10:101996991-101996932	hs|10q24.31	AATATCGGAGATGGCAAAGGCTTGTGACGGAGATATCTCTCTTAAGCCTTTCCTGCATCA
A_21_P0000312	SNORA14B	677802	NR_002956	3.42839	6.21064	4.98011	6.5699	5.38514	7.16267	5.5131	7.82928	44.9049	163.789	36.3898	227.171	P	P	P	P	0	NR_002956	NR_002956	Hs.744743	small nucleolar RNA, H/ACA box 14B				Homo sapiens small nucleolar RNA, H/ACA box 14B (SNORA14B), small nucleolar RNA [NR_002956]	chr1:235291219-235291160	hs|1q42.3	TAAGTGCTTCCAAGATATGAGTGAATGCTATAGAAATTGCAGGGGAGTCCAAAGGGCTGC
A_21_P0000320	SNORA30	677813	NR_002966	-5.45584	6.1601	1.33337	5.59642	7.5044	5.0566	5.39272	5.80781	203.372	39.5081	33.4358	55.0233	P	P	P	P	0	NR_002966	NR_002966	Hs.689718	small nucleolar RNA, H/ACA box 30				Homo sapiens small nucleolar RNA, H/ACA box 30 (SNORA30), small nucleolar RNA [NR_002966]	chr16:30721922-30721981	hs|16p11.2	AAACCCTTGATTGTATTCTTGCCCTGGGATTATACCAGTGGCAACTGTCACTCAATGGGA
A_21_P0000332	SNORA45B	677826	NR_002977	3.82681	10.3687	5.20776	10.4839	9.44575	11.3819	9.36097	11.7416	845.622	2716.1	519.756	3256.98	P	P	P	P	0	NR_002977	NR_002977	Hs.745552	small nucleolar RNA, H/ACA box 45B		THC2502833		Homo sapiens small nucleolar RNA, H/ACA box 45B (SNORA45B), small nucleolar RNA [NR_002977]	chr11:8707013-8707072	hs|11p15.4	AACTCTTGTCCTGGTGTGCTAGAGTACTCGAAGAGAATCTACTGGTCTTGATTCACTGGT
A_21_P0000336	SNORA54	677833	NR_002982	19.3181	12.2206	14.2472	12.5358	10.2699	14.5418	10.7651	14.5977	1551.89	22544.4	1380.62	23188.9	P	P	P	P	0	NR_002982	NR_002982	Hs.689696	small nucleolar RNA, H/ACA box 54		THC2526961		Homo sapiens small nucleolar RNA, H/ACA box 54 (SNORA54), small nucleolar RNA [NR_002982]	chr11:2985060-2985001	hs|11p15.4	TTTCCAGCGACACATGACTGACTGACTGGTGGCTTTCAGTTTCAGGTCTTGGAGACAAAT
A_21_P0000347	SNORA76C	677842	NR_002995	-9.32571	10.0878	-4.84974	9.34297	11.8261	8.60494	10.5511	8.27319	4838.73	428.504	1192.81	308.493	P	P	P	P	0	NR_002995	NR_002995	Hs.405444	small nucleolar RNA, H/ACA box 76C	ENST00000582965	THC2773879		Homo sapiens small nucleolar RNA, H/ACA box 76C (SNORA76C), small nucleolar RNA [NR_002995]	chr17:62223722-62223781	hs|17q23.3	AGCTTCCTCGTGGCGCCGGGGGTCAATCTGCAGCGCTAGAGCATGTGCTTGCGCATAACT
A_21_P0000350	SCARNA20	677681	NR_002999	-4.39482	8.25359	-1.98471	7.93245	9.39029	7.25449	8.44231	7.45338	811.614	174.574	272.632	175.046	P	P	P	P	0	NR_002999	NR_002999		small Cajal body-specific RNA 20				Homo sapiens small Cajal body-specific RNA 20 (SCARNA20), guide RNA [NR_002999]	chr17:58308936-58308877	hs|17q23.2	GAGGATCGTCGTCAGGACTGCCACGAGTGGGGCAGCCTTGTTTTCCTGCCTCAGACATGT
A_21_P0000353	SCARNA23	677773	NR_003007	-4.0357	6.86263	-2.72131	6.85305	7.94244	5.92962	7.61314	6.16884	276.978	71.7798	153.554	71.6281	P	P	P	P	0	NR_003007	NR_003007	Hs.689695	small Cajal body-specific RNA 23				Homo sapiens small Cajal body-specific RNA 23 (SCARNA23), guide RNA [NR_003007]	chrX:24762628-24762687	hs|Xp22.11	AGTAGCTTTCTGTTCTTCCTTTGCAAGTAAAAAGGGTGGGTCGTTCCACTACTGACATTT
A_21_P0000361	SNORA79	677845	NR_003021	-8.82614	6.22886	-1.32499	5.87364	7.99478	4.853	6.08014	5.67415	287.465	33.9838	53.8362	50.2937	P	P	P	P	0	NR_003021	NR_003021	Hs.693251	small nucleolar RNA, H/ACA box 79				Homo sapiens small nucleolar RNA, H/ACA box 79 (SNORA79), small nucleolar RNA [NR_003021]	chr14:81669099-81669040	hs|14q31.1	CTCAGAGAATATTAGGATAATGGAGTTATCTGTTCTCTGAAATTTGCGGAATCAAACATG
A_21_P0000369	SNORA16A	692073	NR_003035	3.24425	15.6404	4.81854	15.6701	14.8145	16.5124	14.5768	16.8454	38596.4	91588.7	20412.1	105180	P	P	P	P	0	NR_003035	NR_003035	Hs.632377	small nucleolar RNA, H/ACA box 16A		THC2619997		Homo sapiens small nucleolar RNA, H/ACA box 16A (SNORA16A), small nucleolar RNA [NR_003035]	chr1:28907491-28907432	hs|1p35.3	CTTGACGGTCGCCGTTCTGTTTGTTGTAACTGATCTGCAACATTTTGGGAAAATACAGTT
A_21_P0000370	SNORD6	692075	NR_003036	2.04832	8.60884	6.0376	8.76981	8.10715	9.14159	7.56821	10.1622	311.413	610.276	149.326	1103.74	P	P	P	P	0	NR_003036	NR_003036		small nucleolar RNA, C/D box 6		THC2491554		Homo sapiens small nucleolar RNA, C/D box 6 (SNORD6), small nucleolar RNA [NR_003036]	chr11:93464729-93464670	hs|11q21	TGATGGGCGAAATGTTCAACTGCTCTGAAGGGGCTGAATGAAAATGGCCTTTCTGAACAT
A_21_P0000374	SNORD59B	692090	NR_003046	4.02082	7.2744	4.00056	7.55779	6.33958	8.34707	6.62357	8.62377	88.7502	363.237	79.1279	388.871	P	P	P	P	0	NR_003046	NR_003046	Hs.712426	small nucleolar RNA, C/D box 59B		THC2542554		Homo sapiens small nucleolar RNA, C/D box 59B (SNORD59B), small nucleolar RNA [NR_003046]	chr12:57037523-57037464	hs|12q13.3	AGTACGTTCTGACTTTCGTTCTTCTGAGTTTGCTGAAGCCAGATGCAATTTCTGAGAAGG
A_21_P0000378	SNORD66	692107	NR_003055	4.65982	8.60558	8.51576	8.54372	7.56676	9.78703	7.13723	10.2274	212.923	937.167	111.293	1152.76	P	P	P	P	0	NR_003055	NR_003055		small nucleolar RNA, C/D box 66				Homo sapiens small nucleolar RNA, C/D box 66 (SNORD66), small nucleolar RNA [NR_003055]	chr3:184043500-184043559	hs|3q27.1	CTGTTAGTGCCACGTGTCTGGGCCACTGAGACACCATGATGGAACTGAGGATCTGAGGAA
A_21_P0000379	SNORD67	692108	NR_003056	6.17824	7.1861	21.8215	7.55279	5.99158	8.61878	5.64954	10.0972	69.0612	432.031	39.8747	1051.82	P	P	P	P	0	NR_003056	NR_003056	Hs.693252	small nucleolar RNA, C/D box 67				Homo sapiens small nucleolar RNA, C/D box 67 (SNORD67), small nucleolar RNA [NR_003056]	chr11:46783998-46783939	hs|11p11.2	GGCACCACTCAGTATCACCCTGGTGACAAAATCAAGTGCACAGGGGCCATCTGACTCACA
A_21_P0000382	SNORD71	692111	NR_003059	12.5695	9.80617	17.57	9.49014	8.14879	11.8007	7.64522	11.7803	320.238	3574.85	157.546	3338.42	P	P	P	P	0	NR_003059	NR_003059		small nucleolar RNA, C/D box 71				Homo sapiens small nucleolar RNA, C/D box 71 (SNORD71), small nucleolar RNA [NR_003059]	chr16:71792377-71792318	hs|16q22.2	ATGAAAGTACGGAGTGATCCATCGGCTAAGTGTCTTGTCACAATGCTGACACTCAAACTG
A_21_P0000384	SNORD85	692200	NR_003066	6.60791	7.38957	9.01354	7.28243	6.15196	8.87616	5.8671	9.03919	76.8694	511.957	46.4618	519.832	P	P	P	P	0	NR_003066	NR_003066		small nucleolar RNA, C/D box 85				Homo sapiens small nucleolar RNA, C/D box 85 (SNORD85), small nucleolar RNA [NR_003066]	chr1:31441069-31441010	hs|1p35.2	TACACACTTGCCCTCACTTAGACTATAGTTCACTGATGAGAGCATTGTTCTGAGCCAGTC
A_21_P0000386	SNORD89	692205	NR_003070	38.7057	10.8152	51.9639	10.7733	8.49489	13.7694	8.2941	13.9935	416.713	13348.8	246.482	14873.3	P	P	P	P	0	NR_003070	NR_003070	Hs.656503	small nucleolar RNA, C/D box 89		THC2498573		Homo sapiens small nucleolar RNA, C/D box 89 (SNORD89), small nucleolar RNA [NR_003070]	chr2:101889457-101889398	hs|2q11.2	GCTCTCCATGGGCACACGATGACAAAATATCCTGAAGCGAACCACTAGTCTGACCTCAGT
A_21_P0000387	SNORD90	692206	NR_003071	13.041	8.51031	18.6477	8.45992	6.8571	10.5621	6.60873	10.8297	126.882	1571.72	78.2596	1726.66	P	P	P	P	0	NR_003071	NR_003071	Hs.693253	small nucleolar RNA, C/D box 90				Homo sapiens small nucleolar RNA, C/D box 90 (SNORD90), small nucleolar RNA [NR_003071]	chr9:125642551-125642492	hs|9q33.2	GTGAAAATTTAATTCATCACTGATACTCCTACTGTGGAATCTGAAGACACTTGAAAACGT
A_21_P0000388	SNORD91A	692207	NR_003072	-4.08051	6.57152	1.13567	6.97385	7.66372	5.63497	6.88268	7.06622	227.863	58.9493	93.7695	132.543	P	P	P	P	0	NR_003072	NR_003072		small nucleolar RNA, C/D box 91A				Homo sapiens small nucleolar RNA, C/D box 91A (SNORD91A), small nucleolar RNA [NR_003072]	chr17:2233637-2233578	hs|17p13.3	TATCGTCTGAACCTGTCTGAAGCATCTCAGTGATGCAATCTCTGTGTGGTTCTGAGACTT
A_21_P0000394	SNORD110	692213	NR_003078	5.06222	10.5758	6.84248	10.5185	9.47045	11.8102	9.22236	11.9969	860.513	3599.43	470.745	3874.28	P	P	P	P	0	NR_003078	NR_003078		small nucleolar RNA, C/D box 110	ENST00000494697	THC2552075		Homo sapiens small nucleolar RNA, C/D box 110 (SNORD110), small nucleolar RNA [NR_003078]	chr20:2634869-2634928	hs|20p13	ACTTGCGAATCAAATCTGTCAATCCCCTGAGTGCAATCACTGATGTCTCCATGTCTCTGA
A_21_P0000397	SCARNA18	677765	NR_003139	-4.04598	9.87248	1.21094	9.45941	10.9321	8.91558	9.32236	9.59848	2505.45	525.48	505.82	751.55	P	P	P	P	0	NR_003139	NR_003139	Hs.693283	small Cajal body-specific RNA 18				Homo sapiens small Cajal body-specific RNA 18 (SCARNA18), guide RNA [NR_003139]	chr5:82360082-82360023	hs|5q14.2	GTTCTCAGGGCTGCCAACCTTCTAGTAAAGGTTGAGTGGTAGTATATTTCTCCAACATAA
A_21_P0000447	SNORD116-11	100033423	NR_003326	-4.30963	6.73746	-8.89908	6.82207	7.87315	5.76559	8.57875	5.4251	263.558	64.2179	302.344	42.338	P	P	P	P	0	NR_003326	NR_003326		small nucleolar RNA, C/D box 116-11				Homo sapiens small nucleolar RNA, C/D box 116-11 (SNORD116-11), small nucleolar RNA [NR_003326]	chr15:25321109-25321168	hs|15q11.2	GGAAAGTTGAACAAAATGAGTGAAAACTTTATACTGTCATCCTCTTCAAACTGAGGTCCA
A_21_P0000448	SNORD116-12	100033424	NR_003327	-6.31516	6.47255	-10.3331	6.44382	7.93707	5.27825	8.34498	4.97578	276.04	45.8742	255.076	31.3946	P	P	P	P	0	NR_003327	NR_003327		small nucleolar RNA, C/D box 116-12				Homo sapiens small nucleolar RNA, C/D box 116-12 (SNORD116-12), small nucleolar RNA [NR_003327]	chr15:25322231-25322290	hs|15q11.2	GGAAAGCTGAATAAAATGAATGAAAACTCTATACCATCATCCTCATTGAACTGAGGTCCC
A_21_P0000450	SNORD116-26	100033438	NR_003340	-1.74572	7.11927	-4.18806	7.30333	7.53252	6.72869	8.40918	6.3429	207.56	122.889	266.741	80.2163	P	P	P	P	0	NR_003340	NR_003340	Hs.605154	small nucleolar RNA, C/D box 116-26				Homo sapiens small nucleolar RNA, C/D box 116-26 (SNORD116-26), small nucleolar RNA [NR_003340]	chr15:25342843-25342902	hs|15q11.2	GAATCTGAACAAAATGAGTGACCAAATCATTTCTGTGCCACTTCTGTGAGCTGAGGTCCA
A_21_P0000451	SNORD116-27	100033439	NR_003341	-2.68575	6.83017	-6.20652	7.09668	7.57991	6.15458	8.53472	5.90093	215.44	83.1645	292.337	58.6829	P	P	P	P	0	NR_003341	NR_003341	Hs.605154	small nucleolar RNA, C/D box 116-27				Homo sapiens small nucleolar RNA, C/D box 116-27 (SNORD116-27), small nucleolar RNA [NR_003341]	chr15:25346754-25346813	hs|15q11.2	TAAATCTGAACAAAATGAGTGACCAAAACACTTCTGTACCACTTCTGTGAGCTGAGGTCC
A_21_P0000463	SNORD105B	100113382	NR_003688	5.71837	11.9651	5.61539	12.2309	10.7732	13.2888	11.0493	13.5387	2236.93	9673.47	1663.37	11134.2	P	P	P	P	0	NR_003688	NR_003688		small nucleolar RNA, C/D box 105B				Homo sapiens small nucleolar RNA, C/D box 105B (SNORD105B), small nucleolar RNA [NR_003688]	chr19:10220457-10220516	hs|19p13.2	TCTGCTGAGACGCTGTGATTGCTCTGTCCAAAGTAAACGCCCTGACGCACTGTGGGAAGG
A_21_P0000487	SNORD94	692225	NR_004378	3.98917	6.92069	4.60787	6.85783	5.99424	7.99033	5.84377	8.04787	69.2233	286.156	45.9013	265.072	P	P	P	P	0	NR_004378	NR_004378	Hs.723087	small nucleolar RNA, C/D box 94		THC2578304		Homo sapiens small nucleolar RNA, C/D box 94 (SNORD94), small nucleolar RNA [NR_004378]	chr2:86363070-86363129	hs|2p11.2	CTGCATGTGGCAGGCTGATGGGGAGCACTTACATGAGACTGTTGCCTCAATCTGAGCCTG
A_21_P0000488	SNORD96B	692226	NR_004379	3.3882	8.13093	4.62358	8.18119	7.29818	9.0587	7.15091	9.35992	175.095	575.191	112.24	636.811	P	P	P	P	0	NR_004379	NR_004379		small nucleolar RNA, C/D box 96B				Homo sapiens small nucleolar RNA, C/D box 96B (SNORD96B), small nucleolar RNA [NR_004379]	chrX:109468276-109468217	hs|Xq23	AGACGACATTGTCAGCCAATCCCCATGTGGTAGTGAGGACATGTCCTGCAGTTCTGAAGG
A_21_P0000490	SNORD105	692229	NR_004381	3.56001	7.57545	6.27857	7.28194	6.71468	8.54656	6.07632	8.72676	114.77	412.9	53.7295	417.919	P	P	P	P	0	NR_004381	NR_004381		small nucleolar RNA, C/D box 105				Homo sapiens small nucleolar RNA, C/D box 105 (SNORD105), small nucleolar RNA [NR_004381]	chr19:10218350-10218409	hs|19p13.2	ATATGCCTCTGAGCTGCTGTGATTTCTGGCTTCAAAGTAAACGCTCTGAAGAAGAGATGG
A_21_P0000491	SNAR-G1	100126780	NR_004383	-7.90106	8.27683	-1.98	7.23308	9.90108	6.91903	7.74259	6.75709	1185.78	140.441	168.381	107.037	P	P	P	P	0	NR_004383	NR_004383	Hs.621635	small ILF3/NF90-associated RNA G1		THC2776275		Homo sapiens small ILF3/NF90-associated RNA G1 (SNAR-G1), small nuclear RNA [NR_004383]	chr19:49540322-49540381	hs|19q13.33	TCAAGGCTAGGCGAGGGTGTGAGGGACTGGAGTTCGAGGTCAACCTGGGCCCCATTGGTA
A_21_P0000492	SNAR-F	100126781	NR_004384	-64.9044	9.86231	-18.3911	7.80076	13.3216	7.30133	10.1791	5.97813	13919.3	179.857	926.779	62.1287	P	P	P	P	0	NR_004384	NR_004384	Hs.707968	small ILF3/NF90-associated RNA F				Homo sapiens small ILF3/NF90-associated RNA F (SNAR-F), small nuclear RNA [NR_004384]	chr19:51108271-51108330	hs|19q13.33	AGGCGAGGGTGTGAGGGTACAGAGTTCGAGGCCAACTTGGTCCACATTGGTAGGAAAAAA
A_21_P0000493	SCARNA14	692149	NR_004388	-5.61243	7.91884	1.78398	6.89239	9.26032	6.7717	6.48748	7.32258	737.886	126.823	71.6857	160.142	P	P	P	P	0	NR_004388	NR_004388		small Cajal body-specific RNA 14				Homo sapiens small Cajal body-specific RNA 14 (SCARNA14), guide RNA [NR_004388]	chr15:66639614-66639555	hs|15q22.31	TAAAACAGATGGTTCCTGCCGACAGGGTCTGTATAGTTATCAGATTTTCTGTGCGATGGC
A_21_P0000494	SNORA16B	692157	NR_004389	3.594	12.8642	5.67982	12.9129	11.9745	13.8201	11.7206	14.2264	5365.66	13645.3	2665.42	17352.9	P	P	P	P	0	NR_004389	NR_004389	Hs.707958	small nucleolar RNA, H/ACA box 16B				Homo sapiens small nucleolar RNA, H/ACA box 16B (SNORA16B), small nucleolar RNA [NR_004389]	chr1:212526233-212526292	hs|1q32.3	CTTGATGGTCATAGTTCTGTTTGCTGTAACTGATCTGCAAGATTTTGGGAAAATACCATT
A_21_P0000497	SNORD1B	677849	NR_004396	1.66207	7.27277	8.42663	6.77148	6.9155	7.64849	5.40635	8.48131	132.109	226.83	33.7729	355.604	P	P	P	P	0	NR_004396	NR_004396		small nucleolar RNA, C/D box 1B				Homo sapiens small nucleolar RNA, C/D box 1B (SNORD1B), small nucleolar RNA [NR_004396]	chr17:74557216-74557275	hs|17q25.1	TCCCTGTCTGAAGGCAAAGAAAGGCCTTTCTGTGTGGAATTTGAATATCTGAAACTCAGT
A_21_P0000500	SNORD86	692201	NR_004399	-4.17647	9.8089	-1.95707	9.03685	10.8941	8.83181	9.53417	8.56548	2442.96	496.614	587.265	375.541	P	P	P	P	0	NR_004399	NR_004399	Hs.376064	small nucleolar RNA, C/D box 86	ENST00000484998	THC2528141		Homo sapiens small nucleolar RNA, C/D box 86 (SNORD86), small nucleolar RNA [NR_004399]	chr20:2636769-2636828	hs|20p13	CCCTGACCTATACAGGCCTCTGCTATGGGGGTGATGGCCAGTCCTGGTGTCTGAGTGATT
A_21_P0000502	RNU11	26824	NR_004407	5.76031	10.6128	5.86975	10.2279	9.42464	11.9508	9.03065	11.584	834.334	3946.66	411.062	2925.04	P	P	P	P	0	NR_004407	NR_004407	Hs.640266	RNA, U11 small nuclear	ENST00000602813			Homo sapiens RNA, U11 small nuclear (RNU11), small nuclear RNA [NR_004407]	chr1:28975178-28975237	hs|1p35.3	TCAAGAGATTTCGGAAGCATAATTTTTTGGTATTTGGGCAGCTGGTGATCGTTGGTCCCG
A_21_P0000507	SNAR-B2	100170217	NR_024230	-58.7495	12.1914	-10.9694	10.2125	15.4787	9.6022	12.0853	8.6299	59464.5	827.421	3443.78	390.356	P	P	P	P	0	NR_024230	NR_024230	Hs.723095	small ILF3/NF90-associated RNA B2		THC2561123		Homo sapiens small ILF3/NF90-associated RNA B2 (SNAR-B2), small nuclear RNA [NR_024230]	chr19:50637071-50637012	hs|19q13.33	GTAGGCGAGGGTTCGAGGGCACGAGTTCGAGGCCAACCTGGTCCACATGGGTTGAAAAAA
A_21_P0000508	SNAR-D	100170227	NR_024243	-73.5689	11.517	-12.8795	9.57842	15.0276	8.82657	11.5977	7.91071	44648.1	494.957	2439.92	240.374	P	P	P	P	0	NR_024243	NR_024243	Hs.717309	small ILF3/NF90-associated RNA D				Homo sapiens small ILF3/NF90-associated RNA D (SNAR-D), small nuclear RNA [NR_024243]	chr19:50643528-50643469	hs|19q13.33	GGAGGCAGGGGTTCGAGGGTACGAGTTCAAGGCCAACCTGGTCCACATGGGTTGAAAAAA
A_21_P0000509	SNAR-G2	100170228	NR_024244	-76.8475	10.6838	-16.8499	8.99918	14.2654	8.00145	11.2643	7.18958	27383	288.411	1939.36	145.87	P	P	P	P	0	NR_024244	NR_024244	Hs.717308	small ILF3/NF90-associated RNA G2				Homo sapiens small ILF3/NF90-associated RNA G2 (SNAR-G2), small nuclear RNA [NR_024244]	chr19:49534993-49534934	hs|19q13.33	AGGGGAGGGTTCGAGGGTACGAGTTCGAGGCCAACCGGGTCCACATTGGTTGAGAAAAAA
A_21_P0000511	SNAR-H	100170221	NR_024342	-71.6101	10.7428	-16.8926	8.78134	14.2569	8.09484	11.0542	6.97584	27158.5	307.181	1668.85	124.637	P	P	P	P	0	NR_024342	NR_024342	Hs.717311	small ILF3/NF90-associated RNA H				Homo sapiens small ILF3/NF90-associated RNA H (SNAR-H), small nuclear RNA [NR_024342]	chr2:78182103-78182044	hs|2p12	GGAGGCGAGGGTGCGAGGGTACGAGTTTGAGGCCAACCTGGTCCACATTGGTTGAAAAAA
A_21_P0000514	VTRNA1-2	56663	NR_026704	-4.25018	5.27704	-1.10502	4.81433	6.42303	4.33551	4.8869	4.74284	94.0337	22.2338	23.6494	26.6598	P	P	P	P	0	NR_026704	NR_026704		vault RNA 1-2				Homo sapiens vault RNA 1-2 (VTRNA1-2), vault RNA [NR_026704]	chr5:140098539-140098598	hs|5q31.3	AGTACATTGTAACCACCTCTCTGGGTGGTTCGAGACCCGCGGGTGCTTTCCAGCTCTTTT
A_21_P0000515	VTRNA1-3	56662	NR_026705	-7.6021	8.07433	1.18856	7.71908	9.66903	6.74263	7.59547	7.84469	996.326	124.011	151.72	230.115	P	P	P	P	0	NR_026705	NR_026705	Hs.543887	vault RNA 1-3		THC2761117		Homo sapiens vault RNA 1-3 (VTRNA1-3), vault RNA [NR_026705]	chr5:140105752-140105811	hs|5q31.3	TTAGCTCAGCGGTTACTTCGCGTGTCATCAAACCACCTCTCTGGGTTGTTCGAGACCCGC
A_21_P0000530	LRRC75A-AS1	125144	NR_045024	-5.49292	9.52678	-1.1156	10.0486	10.8345	8.37692	10.1279	9.97004	2334.39	369.422	895.072	962.183	P	P	P	P	0	NR_045024	NR_045024	Hs.368934	LRRC75A antisense RNA 1		THC2532163	GO:0005739(mitochondrion)	Homo sapiens LRRC75A antisense RNA 1 (LRRC75A-AS1), transcript variant 27, long non-coding RNA [NR_045024]	chr17:16344470-16344529	hs|17p11.2	CCTTCAACCCCATAGTGGAATGAATAAACAGCTGATCTTGTTAAAACTCGCTTCAAAAAA
A_21_P0000584	VTRNA2-1	100126299	NR_030583	-8.83037	6.74758	-1.12145	7.82776	8.49934	5.35687	7.91088	7.74552	417.952	48.5877	190.37	214.172	P	P	P	P	0	NR_030583	NR_030583		vault RNA 2-1	ENST00000602301			Homo sapiens vault RNA 2-1 (VTRNA2-1), vault RNA [NR_030583]	chr5:135416246-135416187	hs|5q31.1	CTTTCTATCTGTCCATCTCTGTGCTGGGGTTCGAGACCCGCGGGTGCTTACTGACCCTTT
A_21_P0000591	SNORA70F	100337591	NR_033309	2.67872	8.95656	4.78668	8.88169	8.27395	9.69549	7.82371	10.0827	354.731	881.585	178.527	1039.53	P	P	P	P	0	NR_033309	NR_033309	Hs.664357	small nucleolar RNA, H/ACA box 70F		THC2527801		Homo sapiens small nucleolar RNA, H/ACA box 70F (SNORA70F), small nucleolar RNA [NR_033309]	chr2:165544212-165544153	hs|2q24.3	TTGGTGGTGTATGCAGCCTGTTTCCTCTATAGGTTGCTCTAAGGGACCTTGATAATAGGC
A_21_P0000599	MKRN1	23608	NM_013446	1.49025	8.66986	5.15725	8.77539	8.38686	8.96242	7.67151	10.0381	384.959	540.352	160.649	1009.14	P	P	P	P	0	NM_013446	NM_013446	Hs.744883	makorin ring finger protein 1	ENST00000599191	THC2608518	GO:0000209(protein polyubiquitination)|GO:0003682(chromatin binding)|GO:0004842(ubiquitin-protein ligase activity)|GO:0005515(protein binding)|GO:0005575(cellular_component)|GO:0008270(zinc ion binding)|GO:0016874(ligase activity)	Homo sapiens makorin ring finger protein 1 (MKRN1), transcript variant 1, mRNA [NM_013446]	chr7:140154344-140154285	hs|7q34	GGAAGATTTTTATGACTTGGATCTATAGCAACCTTGTGTGGCGTGTGAACTGGTCTGCTG
A_21_P0000607	ST3GAL4-AS1	399972	NR_033839	-1.04298	7.71176	-5.38734	7.06993	7.74218	7.68146	8.38832	5.95875	240.514	232.27	263.336	61.3203	P	P	P	P	0	NR_033839	NR_033839	Hs.585206	ST3GAL4 antisense RNA 1 (head to head)		THC2605814		Homo sapiens ST3GAL4 antisense RNA 1 (head to head) (ST3GAL4-AS1), long non-coding RNA [NR_033839]	chr11:126211673-126211614	hs|11q24.2	GTGGCCAAGAAATGTATTCTCTCACTTTGGACTTAGGAGTCCAAAGAGAAGCCCAGAAAC
A_21_P0000610	LINC01060	401164	NR_033869	-6.54071	6.88373	-3.24195	6.5274	8.3705	5.66105	7.43074	5.73388	380.738	60.1496	135.724	52.4625	P	P	P	P	0	NR_033869	NR_033869	Hs.435756	long intergenic non-protein coding RNA 1060	ENST00000503458	THC2710615		Homo sapiens long intergenic non-protein coding RNA 1060 (LINC01060), long non-coding RNA [NR_033869]	chr4:189523000-189523059	hs|4q35.2	TGAAGGAATTGCCTACCCCACCTCACCTCCAAAATTAAAGTCTTTCGTTTTGACAAAAGT
A_21_P0000671	MT1E	4493	NM_175617	-1.47202	10.6687	9.10341	7.9489	10.9513	10.3935	6.51379	9.7002	2550.25	1404.19	73.1198	797.807	P	P	P	P	0	NM_175617	NM_175617	Hs.744893	metallothionein 1E	ENST00000563395	THC2517035	GO:0005634(nucleus)|GO:0005737(cytoplasm)|GO:0008270(zinc ion binding)|GO:0045926(negative regulation of growth)|GO:0048471(perinuclear region of cytoplasm)|GO:0071276(cellular response to cadmium ion)|GO:0071294(cellular response to zinc ion)	Homo sapiens metallothionein 1E (MT1E), mRNA [NM_175617]	chr16:56660883-56660942	hs|16q12.2	ATGTGGGAACAGCTCTTCTCCCAGATGTTAATAGAACAACCTGCACAACCTGGATTTTTT
A_21_P0000740	HIVEP3	59269	NR_038260	6.53229	7.41397	2.80621	7.6692	6.18276	8.89035	6.96093	8.44955	78.7111	515.734	98.8081	348.08	P	P	P	P	0	NR_038260	NR_038260	Hs.648369	human immunodeficiency virus type I enhancer binding protein 3	ENST00000491442	THC2607583	GO:0003677(DNA binding)|GO:0005634(nucleus)|GO:0005737(cytoplasm)|GO:0006351(transcription, DNA-dependent)|GO:0035914(skeletal muscle cell differentiation)|GO:0045893(positive regulation of transcription, DNA-dependent)|GO:0046872(metal ion binding)	Homo sapiens human immunodeficiency virus type I enhancer binding protein 3 (HIVEP3), transcript variant 3, non-coding RNA [NR_038260]	chr1:42313191-42313132	hs|1p34.2	AGCTACTTCCAAATCCTACTTACCCCAAAGACAAGATGATCATTTAGTCATATAGTATCA
A_21_P0000750	MFI2-AS1	100507057	NR_038285	-1.36583	7.1741	-12.2047	7.49897	7.40251	6.95273	9.51775	5.90838	189.56	143.099	578.312	58.934	P	P	P	P	0	NR_038285	NR_038285	Hs.666451	MFI2 antisense RNA 1		THC2670897		Homo sapiens MFI2 antisense RNA 1 (MFI2-AS1), long non-coding RNA [NR_038285]	chr3:196731528-196731587	hs|3q29	CAGCCCTAAAAGAGCTACTAAAAAGACCAGAAGTAGTATGAGAACTTATGAATACGAATA
A_21_P0000751	PSMD6-AS2	100507062	NR_038286	5.01358	8.83457	1.94049	8.74159	7.74786	10.0737	8.27645	9.23286	241.062	1129.56	243.643	585.298	P	P	P	P	0	NR_038286	NR_038286	Hs.593613	PSMD6 antisense RNA 2		THC2535207		Homo sapiens PSMD6 antisense RNA 2 (PSMD6-AS2), long non-coding RNA [NR_038286]	chr3:63997696-63997755	hs|3p14.1	TGGGATACCAGCCTTCCATTTTGGTAGGGATCATTTAAAAAATGGTAGGGATCATTTAAA
A_21_P0000759	ITGB2-AS1	100505746	NR_038311	13.6871	7.6047	1.2713	8.50742	5.94803	9.72278	8.33602	8.68233	67.0405	899.857	253.8	403.944	P	P	P	P	0	NR_038311	NR_038311	Hs.661035	ITGB2 antisense RNA 1		THC2551968		Homo sapiens ITGB2 antisense RNA 1 (ITGB2-AS1), transcript variant 1, long non-coding RNA [NR_038311]	chr21:46348646-46348705	hs|21q22.3	ATTTCTTTTCCCGTTCAATTCATGGTTTCTGCCCAAACGGAGCCACGTGAGGACTTCTTT
A_21_P0000781	HOTAIRM1	100506311	NR_038366	16.9496	9.27306	5.42695	11.0308	7.45355	11.5367	9.87796	12.3181	196.321	3000.86	753.09	4804.97	P	P	P	P	0	NR_038366	NR_038366	Hs.445239	HOXA transcript antisense RNA, myeloid-specific 1		THC2553379		Homo sapiens HOXA transcript antisense RNA, myeloid-specific 1 (HOTAIRM1), transcript variant 1, long non-coding RNA [NR_038366]	chr7:27139801-27139860	hs|7p15.2	TGGCTTTCTGTTTTGTTGCTGTCCATTGAAGACTTTGAACATGCCGCCTTAATAAATGTA
A_21_P0000809	NAPA-AS1	100505681	NR_038452	-4.34886	6.90194	-7.71624	7.09733	8.04323	5.9226	8.72271	5.77482	296.884	71.5409	332.933	53.9017	P	P	P	P	0	NR_038452	NR_038452	Hs.657320	NAPA antisense RNA 1		THC2517872		Homo sapiens NAPA antisense RNA 1 (NAPA-AS1), long non-coding RNA [NR_038452]	chr19:47987751-47996732	hs|19q13.32	TTAATATTGCCCTTATGTGCCAGGAACTACTATCTCAGCAATGGAGATGTGGTGCTTGGC
A_21_P0000818	LINC00672	100505576	NR_038847	11.8211	6.13088	4.50167	6.00211	4.60286	8.16615	5.0142	7.18466	25.532	321.375	25.564	145.35	P	P	P	P	0	NR_038847		Hs.634043	long intergenic non-protein coding RNA 672		THC2681345		Homo sapiens long intergenic non-protein coding RNA 672 (LINC00672), long non-coding RNA [NR_038847]	chr17:37085310-37085369	hs|17q12	ATTGGGTACAATGTAAGGAGAGAGGATTACCCATCTCTTCAGTTACTTGTAAAATATGAT
A_21_P0000841	PRKAG2-AS1	100505483	NR_038926	6.27226	8.85282	43.8334	8.11562	7.62686	10.2758	5.83455	11.2885	221.95	1290.36	45.6342	2396.95	P	P	P	P	0	NR_038926		Hs.649054	PRKAG2 antisense RNA 1		THC2613474		Homo sapiens PRKAG2 antisense RNA 1 (PRKAG2-AS1), long non-coding RNA [NR_038926]	chr7:151576126-151576185	hs|7q36.1	ACCGCGATGGCGCTTCTCATTTGAAATGTTTTCTTTATGGACAGTGTTTAGCAATTGTTA
A_21_P0000898	MIR181A1HG	100131234	NR_040073	1.93425	5.964	4.7826	6.39319	5.50707	6.45884	5.3632	7.62099	48.905	101.134	32.7191	197.081	P	P	P	P	0	NR_040073	NR_040073	Hs.711077	MIR181A1 host gene (non-protein coding)	ENST00000432296	THC2616520		Homo sapiens MIR181A1 host gene (non-protein coding) (MIR181A1HG), long non-coding RNA [NR_040073]	chr1:198869602-198869543	hs|1q32.1	CATCTTTCCAAAGAAGAGTGAGTAGCTTGGTTGGTGGTACCCTAAAATTAGGGCATGATT
A_21_P0000908	FLJ27354	400761	NR_033981	4.7531	5.58406	1.23641	6.01303	4.57171	6.82058	5.8619	6.16806	24.9426	131.495	46.3874	71.6216	P	P	P	P	0	NR_033981	NR_033981	Hs.741594	uncharacterized LOC400761		THC2650992		Homo sapiens uncharacterized LOC400761 (FLJ27354), long non-coding RNA [NR_033981]	chr1:90090558-90090499	hs|1p22.2	TTGAACTCTACCCCTTGAGATATCCTGAGAAATAGGAATCTATGGTTCCTATTGTTTGGA
A_21_P0000973				1.27118	4.71623	-5.14818	5.76582	4.54632	4.89249	7.06777	4.70371	24.3627	34.9295	106.288	25.9944	P	P	P	P	0	ENST00000445039		Hs.118609		ENST00000445039	THC2622128			chr1:53796860-53796919	hs|1p32.3	CTATGTCTTCCTCATCTTTGTCTTCAGAGGATAAATACAAGGCCTGACACATAACAAGCA
A_21_P0000989	LOC101927412	101927412	NR_125940	-2.95171	9.61807	21.4097	8.60692	10.4305	8.86893	6.67605	11.0962	1739.35	508.831	82.1128	2091.89	P	P	P	M	0	NR_125940	NR_125940	Hs.171273	uncharacterized LOC101927412	ENST00000443104	THC2657762		Homo sapiens uncharacterized LOC101927412 (LOC101927412), transcript variant 1, long non-coding RNA [NR_125940]	chr1:81112411-81112470	hs|1p31.1	ACCCCATACCTTGGGCCAATGTAACTGTTAACAGCTTGAAGCTATTAAAAATGTACCAAT
A_21_P0001018	LOC100996741	100996741	XR_250844	4.5994	6.12181	2.20613	6.25443	5.11926	7.32071	5.70966	6.85118	37.498	182.499	41.4946	114.353	P	P	P	P	0	XR_250844	XR_250844		uncharacterized LOC100996741		THC2579624		PREDICTED: Homo sapiens uncharacterized LOC100996741 (LOC100996741), transcript variant X9, ncRNA [XR_250844]	chr1:143728695-143728636	hs|1q21.1	CTTATGAATACTGAATAGTGAACATAGGGTACATTTATATCCTGCTGATTGCTTAGCTGT
A_21_P0001124	LOC101929609	101929609	XR_246317	-2.90177	7.11425	-5.70426	7.16806	7.9241	6.38717	8.53329	6.02125	273.44	96.2872	292.049	64.1857	P	P	P	P	0	XR_246317	XR_246317	Hs.632926	uncharacterized LOC101929609		THC2676211		PREDICTED: Homo sapiens uncharacterized LOC101929609 (LOC101929609), ncRNA [XR_246317]	chr1:44410105-44410046	hs|1p34.1	GTTGGTCACCTGGAACCACTACCAATCCATGTTCATGTCAAATTAAATGATCACTTTGAA
A_21_P0001177	lnc-FAM72C-2		XM_006711090	4.32201	9.74333	2.69666	9.18046	8.74452	10.8562	8.49272	9.92389	505.201	1925.25	283.855	929.64	P	P	P	P	0	lnc-FAM72C-2:1		Hs.613082	lnc-FAM72C-2:1		THC2464966		PREDICTED: Homo sapiens myomegalin-like (LOC100996723), mRNA [XM_006711090]	chr1:144506631-144506690	hs|1q21.1	GACCCAAAGCTGAATTCACCTAATTTTAGGGCCAAAAACCCAAAAAACAAAACAAGACCA
A_21_P0001290	LINC00853	100874253	NR_047498	6.70624	5.61251	-1.01555	8.09416	4.4052	7.1507	8.1053	8.08304	21.9713	162.545	217.359	271.203	P	P	P	P	0	NR_047498	NR_047498	Hs.435758	long intergenic non-protein coding RNA 853		THC2705847		Homo sapiens long intergenic non-protein coding RNA 853 (LINC00853), long non-coding RNA [NR_047498]	chr1:47645923-47645982	hs|1p33	AGGCTGCGGGAAGAGGCTTTGCCCAGCAATAGTCCTGATCTAATGGATCCTTGAAGCACA
A_21_P0001480	lnc-C1orf201-2			52.4753	6.51062	12.4273	7.21948	4.25303	9.96659	5.62708	9.26252	19.4799	1053.27	39.3799	596.355	P	P	P	P	0	lnc-C1orf201-2:2			lnc-C1orf201-2:2		THC2655527		LNCipedia lincRNA (lnc-C1orf201-2), lincRNA [lnc-C1orf201-2:2]	chr1:24822864-24822805	hs|1p36.11	AACACAATCCCAACTGATATTCACTGTAAATGATTCCATGGCTCCCTGTAGTACTTCTAC
A_21_P0001540	lnc-GBP5-2			4.21139	5.81212	-1.51076	6.18401	4.86679	6.94108	6.48881	5.89353	31.3152	142.226	71.7048	58.3274	P	P	P	P	0	lnc-GBP5-2:2			lnc-GBP5-2:2		THC2731633		Q2QUZ4_ORYSA (Q2QUZ4) Tetraspanin family, partial (5%) [THC2731633]	chr1:90097467-90097408	hs|1p22.2	ACCAAAATGAAAAGGACGTTTGTTCAAAAGATATTCTCTTGGGCTTTACATTGCTTTCCC
A_21_P0001573	lnc-IGSF3-1			21.5587	7.86798	-1.69366	8.93961	5.95875	10.3889	9.32776	8.56761	67.5169	1401.57	507.544	375.899	P	P	P	P	0	lnc-IGSF3-1:1		Hs.717989	lnc-IGSF3-1:1				CD014608 Human CD34+ ESTs from primary hematopoietic stem-progenitor cells Homo sapiens cDNA 3', mRNA sequence [GD150158]	chr1:117338687-117338628	hs|1p13.1	TTTGAGGAATGGTCCCTGTGAAGACTTCCCCTTAAGAGAAGTTACCCCTGAGGAGAATTA
A_21_P0001652	lnc-AKT3-2			5.93832	8.6451	4.75889	8.29766	7.45506	10.0251	7.24831	9.49894	196.419	1095.84	119.873	706.032	P	P	P	P	0	lnc-AKT3-2:1			lnc-AKT3-2:1				LNCipedia lincRNA (lnc-AKT3-2), lincRNA [lnc-AKT3-2:1]	chr1:244210793-244210583	hs|1q44	ATCACAGCCACAAAGACGTGGAAATGTCTGCCGTCAAGAAATTGGAAATCGTATCGAGAA
A_21_P0001665	lnc-APITD1-1			-2.72155	7.7813	-4.45142	7.41785	8.53695	7.09253	8.57278	6.41851	430.621	156.55	301.084	84.8312	P	P	P	P	0	lnc-APITD1-1:1			lnc-APITD1-1:1				LNCipedia lincRNA (lnc-APITD1-1), lincRNA [lnc-APITD1-1:1]	chr1:10519717-10519776	hs|1p36.22	TCTTCAGAATAAGGATAATGAATTGGAAATACGACCATTTCTTTTCATTGCCCTTGATGG
A_21_P0001705	LINC00869	57234	NR_111952	6.98828	12.4589	4.51241	12.3791	11.1351	13.94	11.3398	13.5137	2904.44	14873.4	2047.81	10910.3	P	P	P	P	0	NR_111952	NR_111952	Hs.456578	long intergenic non-protein coding RNA 869	ENST00000620190	THC2554293		Homo sapiens long intergenic non-protein coding RNA 869 (LINC00869), transcript variant 8, long non-coding RNA [NR_111952]	chr1:144300717-144300658	hs|1q21.1	AAACTCGAGGACCTATTGCTCCCCAAGAATAACATCTTCCAGAACTAGACAGAAAACTAG
A_21_P0001817	LOC101929531	101929531	XR_241262	59.3292	8.65285	4.761	10.9604	6.19505	12.0857	9.89246	12.1437	79.4991	4341.9	759.736	4273.8	P	P	P	P	0	ENST00000417930	XR_241262		uncharacterized LOC101929531	ENST00000417930	THC2747310		PREDICTED: Homo sapiens uncharacterized LOC101929531 (LOC101929531), ncRNA [XR_241262]	chr2:7865973-7870694	hs|2p25.1	TTGTTCTCAGAGGTCTGGACCAAAGAGAAACAAGAAAAGCTGGAGTCACACTACCAAAGG
A_21_P0001902	LOC101928173	101928173	XR_245039	1.51398	8.00047	17.5398	6.3284	7.70689	8.30523	4.5909	8.72347	234.275	352.712	19.8057	417.068	P	P	P	P	0	ENST00000455309	XR_245039		uncharacterized LOC101928173	ENST00000455309	THC2634723		PREDICTED: Homo sapiens uncharacterized LOC101928173 (LOC101928173), transcript variant X2, ncRNA [XR_245039]	chr2:112268508-112268567	hs|2q13	TAACCCCAGACCCACTATCCTCTGGATTTCTTTTATGTGAAACAATAAAATGTCTTGTAT
A_21_P0002349	lnc-SMARCAL1-2			-4.41453	5.86727	-1.51001	5.80132	7.03537	4.89311	6.10621	5.51165	145.447	34.9447	54.6954	44.8968	P	P	P	P	0	lnc-SMARCAL1-2:5			lnc-SMARCAL1-2:5				LNCipedia lincRNA (lnc-SMARCAL1-2), lincRNA [lnc-SMARCAL1-2:5]	chr2:217385430-217385489	hs|2q35	CTTCTAGAGATGCCAAAATGGAACCAAATCTCCATGAACTCTGCTAATGGAAGACGAGGA
A_21_P0002492	FLJ42351	400999	XM_005275926	3.5777	9.24585	4.02745	8.9284	8.37195	10.211	7.97984	9.98971	381.372	1232.41	199.149	976.599	P	P	P	P	0	ENST00000457336	XM_005275926	Hs.585221	uncharacterized LOC400999	ENST00000457336	THC2552922		uncharacterized LOC400999 [Source:EntrezGene;Acc:400999] [ENST00000457336]	chr2:113402808-113402749	hs|2q13	TTAATTTCTCCGTGGCTGACCTGTGTTTGTAACGCCGCAGCTGTTGCGAGGGGGAAGGAC
A_21_P0002674	FLJ42351	400999	NR_033871	14.7738	6.24678	4.18558	6.23233	4.59935	8.48431	5.28459	7.35002	25.4547	395.733	30.996	162.99	P	P	P	P	0	NR_033871	NR_033871	Hs.635980	uncharacterized LOC400999	ENST00000457336	THC2495521		Homo sapiens uncharacterized LOC400999 (FLJ42351), long non-coding RNA [NR_033871]	chr2:113399669-113399510	hs|2q13	AAGTACTGAGCCTGTATTTTGAGCTGCATCAAACCCTGTTGGAATAAAAAAGGACATTTC
A_21_P0002940				7.98264	9.69153	5.42858	9.35887	8.30825	11.3051	8.2178	10.6584	363.931	2583.39	235.12	1535.75	P	P	P	P	0	ENST00000606069				ENST00000606069				chr3:27755353-27755412	hs|3p24.1	AGAGCAGAAAAGAATTCTAGAGGCTACATGTGGGCTGCTTTCCCCCCTTCTTCCTTTTTT
A_21_P0003024	LOC101928948	101928948	XR_425705	22.2014	7.82026	7.94536	9.08445	5.89744	10.37	7.7116	10.7017	64.5238	1380.2	164.747	1577.26	P	P	P	P	0	XR_425705	XR_425705		uncharacterized LOC101928948				PREDICTED: Homo sapiens uncharacterized LOC101928948 (LOC101928948), transcript variant X3, ncRNA [XR_425705]	chr4:9534234-9554195	hs|4p16.1	ACCGGCACCCAGACAGGTGGCGACGGCAGAGGAGAAGGAAAATACATGTACAGCCAACTT
A_21_P0003091	lnc-AC069257.9.1-5			-1.46509	9.56202	-4.11026	9.39149	9.84148	9.29049	10.4663	8.42706	1133.55	677.392	1129.01	342.329	P	P	P	P	0	lnc-AC069257.9.1-5:4			lnc-AC069257.9.1-5:4		THC2503819		LNCipedia lincRNA (lnc-AC069257.9.1-5), lincRNA [lnc-AC069257.9.1-5:4]	chr3:195376188-195376247	hs|3q29	GGAGCTGGTATTGGTGTTTCTAGTTGAGGGTCGTGGTATTTCCAGGGTTTCACAGAGGCC
A_21_P0003320	LOC100996286	100996286	NR_121627	167.05	7.19822	58.8017	6.83536	4.39779	11.7819	4.50149	10.3793	21.8237	3526.56	18.8525	1272.27	P	P	P	P	0	NR_121627	NR_121627	Hs.322462	uncharacterized LOC100996286	ENST00000499452	THC2654735		Homo sapiens uncharacterized LOC100996286 (LOC100996286), transcript variant 1, long non-coding RNA [NR_121627]	chr4:153025730-153025789	hs|4q31.3	AACCAAATTTCCTGGACAGGCTTCAGAAAACATTCTCCCTGGTGATACAGACATCTGAAA
A_21_P0003704	lnc-FRG1-5			-1.33874	6.90472	-10.2131	7.61494	7.11837	6.69749	9.47341	6.12106	154.569	120.371	560.151	69.2154	P	P	P	P	0	lnc-FRG1-5:3			lnc-FRG1-5:3		THC2771827		LNCipedia lincRNA (lnc-FRG1-5), lincRNA [lnc-FRG1-5:3]	chr4:190198293-190198352	hs|4q35.2	AATCTTGTGCATGTTACAGGGAAGCACTGTCCTACATCGTATCTGACAGGCTCTCATAGT
A_21_P0003797	lnc-SCRG1-1			-4.78368	7.89194	-2.79899	7.6814	9.10136	6.84323	8.45965	6.97474	655.009	133.541	275.979	124.517	P	P	P	P	0	lnc-SCRG1-1:4			lnc-SCRG1-1:4		THC2639072		LNCipedia lincRNA (lnc-SCRG1-1), lincRNA [lnc-SCRG1-1:4]	chr4:174290606-174285312	hs|4q34.1	CCATCGACGCAGAAAATCAAAGAATCAGCTTAAGTTCCAGAAAAAAGAAAAACCAACCAA
A_21_P0003821	lnc-FRG2-5			-1.82116	6.39932	-6.70511	5.71149	6.84634	5.98149	7.24675	4.50149	125.866	74.0695	119.715	23.0979	P	P	P	P	0	lnc-FRG2-5:1			lnc-FRG2-5:1				LNCipedia lincRNA (lnc-FRG2-5), lincRNA [lnc-FRG2-5:1]	chr4:190200310-190200251	hs|4q35.2	TGTTAAAGCATCAGATGTCAATTTGTATTGTGACACCTAAAATTTCATGCTGCACCCCAC
A_21_P0004108				-1.66933	7.22431	-4.77295	5.6583	7.60339	6.86412	6.89697	4.64209	218.896	135.264	94.7439	25.2352	P	P	P	P	0	ENST00000512978				ENST00000512978				chr5:18704601-18704542	hs|5p14.3	TTTGTGGCTCTTCACGAAGATAAATATTTATCACCAAACAATGTAAACTTCCCACATGAC
A_21_P0004133				-2.02713	5.43962	4.32937	5.60447	5.97317	4.95373	4.64621	6.76037	68.1818	36.5208	20.2641	107.183	P	P	P	P	0	ENST00000510261				ENST00000510261				chr5:64782445-64782386	hs|5q12.3	GCCCATAATCTTCATTTCTTAAACGAAGAAGGAAAAGAAAAGCTGGAGTGAAAAGTTTTG
A_21_P0004156				1.11372	4.61668	-16.6981	6.35432	4.53965	4.69503	8.70175	4.64014	24.1448	30.3947	327.957	25.1825	P	P	P	P	0	ENST00000507491				ENST00000507491				chr5:92242949-92242890	hs|5q14.3	GGCCTGTTGTATTCCTGACCTTGCTTCCTCTGTGCAATATATTTACTCCAGGTCATCTCT
A_21_P0004400	lnc-PDE4D-1			-5.42599	6.36023	-10.3478	7.48549	7.69612	5.25623	9.35856	5.98731	232.504	45.2369	518.876	62.5017	P	P	P	P	0	lnc-PDE4D-1:1			lnc-PDE4D-1:1				LNCipedia lincRNA (lnc-PDE4D-1), lincRNA [lnc-PDE4D-1:1]	chr5:59817884-59798437	hs|5q12.1	GGATAAATTCTGGATCAGCACAGAAAACTCTCTCCTTTGTCAGATTGAAAACCTGTAGCA
A_21_P0004868	lnc-HIST1H2AI-2			-2.43813	7.32885	-4.1796	7.32822	7.99988	6.7141	8.43217	6.3688	288.278	121.761	270.696	81.8962	P	P	P	P	0	lnc-HIST1H2AI-2:1			lnc-HIST1H2AI-2:1		THC2625315		LNCipedia lincRNA (lnc-HIST1H2AI-2), lincRNA [lnc-HIST1H2AI-2:1]	chr6:27680817-27680876	hs|6p22.1	AGCTGTCAGAGTTTTAACATCTCAACCAAGCCACATGGATACTATTTCCTCAGAAAAGAC
A_21_P0004869	LOC100131289	100131289	NR_038929	-2.18665	7.1784	-6.3913	6.92299	7.76492	6.63619	8.38917	5.71306	244.054	115.039	263.434	51.7602	P	P	P	P	0	NR_038929	NR_038929	Hs.200573	uncharacterized LOC100131289		THC2675484		Homo sapiens uncharacterized LOC100131289 (LOC100131289), long non-coding RNA [NR_038929]	chr6:27730694-27730753	hs|6p22.1	CGGCAGCTCTGAAAGAGTTTGAAGAATTTATTGTTCACAGATGGTATTTAAATGGACTTA
A_21_P0005293				2.36942	5.45401	11.4857	6.55322	4.86713	6.11166	5.02479	8.54656	31.3232	81.0212	25.7114	371.033	P	P	P	P	0	ENST00000440034				ENST00000440034				chr7:33835174-33835115	hs|7p14.3	CCAAGTCAATTCTCTCCCTCAGTGCCCTCATGTGTATAAATTGCATATCATATGGCATTT
A_21_P0005503	lnc-SBDS-2			-4.01532	7.12108	-7.38765	6.85238	8.19409	6.18858	8.44514	5.56002	332.407	85.0139	273.157	46.4624	P	P	P	M	0	lnc-SBDS-2:2			lnc-SBDS-2:2				LNCipedia lincRNA (lnc-SBDS-2), lincRNA [lnc-SBDS-2:2]	chr7:66798498-66798439	hs|7q11.21	TGGAACTTTGGAAGGGCCTCCTCACCCAATAGGAAGACCTGGCTAGGAATTTAATTTTTT
A_21_P0005521	KMT2E-AS1	100216545	NR_024586	3.54698	10.6492	7.30383	10.0421	9.77498	11.6016	8.70969	11.5783	1078.57	3130.53	329.955	2916.99	P	P	P	P	0	NR_024586	NR_024586	Hs.631150	KMT2E antisense RNA 1 (head to head)		THC2568477		Homo sapiens KMT2E antisense RNA 1 (head to head) (KMT2E-AS1), long non-coding RNA [NR_024586]	chr7:104653832-104653773	hs|7q22.3	TTCCTTTATATGGCGGTGATTAAACGAGGGAGGGACAGACAGTGATCTCGAAGAAAAAAG
A_21_P0005526	lnc-WASL-1			2.59337	6.07006	5.17798	5.74972	5.42145	6.79628	4.68461	7.057	45.9897	129.149	20.8246	131.443	P	P	P	P	0	lnc-WASL-1:1			lnc-WASL-1:1				LNCipedia lincRNA (lnc-WASL-1), lincRNA [lnc-WASL-1:1]	chr7:123316053-123315994	hs|7q31.32	GTGGGCTCTCACCTAGTTTCAAACTGGACTACTTTTTCATGACGGTGATGAAGCCATTTA
A_21_P0005618				3.95602	8.73191	16.4799	7.53491	7.79605	9.78011	5.78001	9.82264	249.189	932.598	43.8235	870.622	P	P	P	M	0	ENST00000561761				ENST00000561761				chr8:134585887-134585946	hs|8q24.22	TTCCTCTTTCTGAAACTCAGGTCAAGGTGTTCACTGCATCTCCAGATTGCTTGTGTGCAT
A_21_P0005657				4.0267	7.10141	1.32675	7.18828	6.16734	8.17694	6.98723	7.39513	77.8048	323.712	100.69	168.116	P	P	P	P	0	ENST00000510244				ENST00000510244				chr3:125627056-125626997	hs|3q21.2	GTACATTGAAGAGTTGGTCTAATATTTGGCCTGGTGGATGGAGAAATTGCCTGTCTGCTC
A_21_P0005658				4.39434	7.09997	1.53243	7.21439	6.11199	8.24764	6.91304	7.52887	74.7716	338.74	95.6893	184.076	P	P	P	P	0	ENST00000514145				ENST00000514145	THC2596870			chr3:129835702-129835761	hs|3q22.1	TGGTTGAAGAAACCAGTCTGACTGTCTCTGAGGCTATGGAGCAGTCCATGAAGAATGAAA
A_21_P0005794	lnc-PRAGMIN.1-3			4.73597	7.32946	2.19311	7.02834	6.29298	8.53664	6.48464	7.61762	85.5092	409.446	71.5237	196.556	P	P	P	P	0	lnc-PRAGMIN.1-3:3			lnc-PRAGMIN.1-3:3				LNCipedia lincRNA (lnc-PRAGMIN.1-3), lincRNA [lnc-PRAGMIN.1-3:3]	chr8:8085049-8084990	hs|8p23.1	AAGTCTTTTTAGCAGGGGCCTTACGGGTTCGCGCTTTGGTCCTGGAGGCCTTATCCTAGC
A_21_P0005813	lnc-DUSP4-4			-4.37376	7.06554	1.52751	6.33247	8.20971	6.08084	6.03425	6.64544	336.96	79.2504	52.1778	98.7667	P	P	P	P	0	lnc-DUSP4-4:1			lnc-DUSP4-4:1		THC2715664		DHAA_BRAJA (P59337) Haloalkane dehalogenase , partial (6%) [THC2715664]	chr8:29386912-29386853	hs|8p12	GAGGTCATTACACACCATATTCGGATGGTGGAAATCATTGCTTATTTCAGGACACTAAAA
A_21_P0005843	lnc-ASPH-6			4.99971	6.70609	7.46035	6.69608	5.64491	7.96675	5.40157	8.30082	53.8222	281.944	33.6147	313.98	P	P	P	P	0	lnc-ASPH-6:1			lnc-ASPH-6:1				LNCipedia lincRNA (lnc-ASPH-6), lincRNA [lnc-ASPH-6:1]	chr8:61822136-61822077	hs|8q12.2	AATTTGTTTGTGTGACAAATTGTCCTGCCGTTCCACCCTCTTAGCTACTGTAACCAGCAC
A_21_P0005923	LOC100506990	100506990	NR_040092	4.06369	6.17135	3.41764	5.98039	5.24228	7.26507	5.15924	6.93224	40.9117	175.873	28.2059	120.822	P	P	P	P	0	NR_040092	NR_040092	Hs.720324	uncharacterized LOC100506990		THC2598120		Homo sapiens uncharacterized LOC100506990 (LOC100506990), transcript variant 2, long non-coding RNA [NR_040092]	chr8:12298514-12302267	hs|8p23.1	GAAACTGAGTTACAGAGCTTGTCTGCACTGAGTCATCAGGAGCAAATGCTAGATCAGATA
A_21_P0005951				-3.99198	7.26951	-4.82242	7.27818	8.33632	6.33922	8.501	6.23125	371.402	93.3712	285.766	74.5058	P	P	P	P	0	ENST00000522414		Hs.133107		ENST00000522414	THC2502386		Pvt1 oncogene (non-protein coding) [Source:HGNC Symbol;Acc:HGNC:9709] [ENST00000522414]	chr8:129111772-129111831	hs|8q24.21	CTTCTATGGGAATCACTACTGACCTTGCAGCTTATTATAGACTTATATGTATGCAGAAAT
A_21_P0006078	LINC01410	103352539	NR_121647	-1.03386	7.87502	-5.60377	9.24724	7.89908	7.85104	10.5736	8.08724	268.55	260.746	1211.75	271.927	P	P	P	P	0	NR_121647	NR_121647	Hs.351215	long intergenic non-protein coding RNA 1410	ENST00000417843	THC2493184		Homo sapiens long intergenic non-protein coding RNA 1410 (LINC01410), long non-coding RNA [NR_121647]	chr9:66469217-66469276	hs|9q13	CCTAAGTATGGTGAAGCAGAATTGAATTCTACAAAAGTCTTTCATCTGTTTTCCTATGGA
A_21_P0006079	LINC01506	101927015	NR_109769	4.56322	7.16908	14.0605	7.24057	6.1572	8.34725	5.58064	9.39422	77.2286	363.256	38.0058	651.228	P	P	P	P	0	NR_109769	NR_109769		long intergenic non-protein coding RNA 1506	ENST00000432148	THC2698682		Homo sapiens long intergenic non-protein coding RNA 1506 (LINC01506), long non-coding RNA [NR_109769]	chr9:71160428-71158472	hs|9q21.11	TGCTGTTTCACTATGCTGCAAATATTCCCAGCCTTTTCCCCTTGATGCCCAAAATAAATT
A_21_P0006321	lnc-PTGES2-1			6.0809	6.4741	-1.15327	5.58791	5.30161	7.9059	5.69172	5.48599	42.4198	269.655	41.0071	44.2031	P	P	P	M	0	lnc-PTGES2-1:5			lnc-PTGES2-1:5				LNCipedia lincRNA (lnc-PTGES2-1), lincRNA [lnc-PTGES2-1:5]	chr9:130875259-130875200	hs|9q34.11	AGATTCCTTTACTGCTTTCTGGCAAATCCACCTCTGGCCAGGCAGTAGGCCGGCAACGCA
A_21_P0006502	lnc-ZC3H12B-2			24.382	7.56693	20.2795	7.88338	5.60602	10.2138	6.00588	10.3478	52.1566	1234.46	51.0823	1248.6	P	P	P	P	0	lnc-ZC3H12B-2:2		Hs.533278	lnc-ZC3H12B-2:2				LNCipedia lincRNA (lnc-ZC3H12B-2), lincRNA [lnc-ZC3H12B-2:2]	chrX:64295733-64295792	hs|Xq11.2	AAGAATTGGGAGTTTTCTGCTGATGATGCTATGCTAAGCTGGGCAGAGAGACCATGGCGA
A_21_P0006537				-1.31712	6.99623	-4.4214	7.89501	7.19775	6.80035	9.03975	6.89524	163.097	129.603	413.846	117.95	P	P	P	P	0	ENST00000439926		Hs.637373		ENST00000439926				chrX:70940588-70940647	hs|Xq13.1	TTTTCTCTTCCGCTGCATTTGCCCCCTTCCCAACGCAGTTCAAAGCAGTGTGAAATAAAG
A_21_P0006549	lnc-APLN-1			4.49025	6.37277	-3.19954	8.67234	5.38081	7.5476	9.55175	7.87389	44.7596	212.325	596.31	233.725	P	P	P	P	0	lnc-APLN-1:1			lnc-APLN-1:1		THC2697511		LNCipedia lincRNA (lnc-APLN-1), lincRNA [lnc-APLN-1:1]	chrX:128812135-128809966	hs|Xq26.1	TAAAAAATGTCGCCTGTGAGGTCTCAGCTCGTACAACAAGAAGATAGCAATCTGCAAACC
A_21_P0006580	SLC9A7	84679	NM_001257291	-7.32877	7.72927	-6.80924	7.65438	9.29847	6.4249	9.1622	6.39471	758.205	98.8782	450.876	83.3672	P	P	P	P	0	NM_001257291	NM_001257291	Hs.91389	solute carrier family 9, subfamily A (NHE7, cation proton antiporter 7), member 7	ENST00000616978	THC2547329	GO:0000139(Golgi membrane)|GO:0005515(protein binding)|GO:0005802(trans-Golgi network)|GO:0006811(ion transport)|GO:0006885(regulation of pH)|GO:0015385(sodium:hydrogen antiporter activity)|GO:0015386(potassium:hydrogen antiporter activity)|GO:0016021(integral to membrane)|GO:0035725(sodium ion transmembrane transport)|GO:0042803(protein homodimerization activity)|GO:0055038(recycling endosome me…	Homo sapiens solute carrier family 9, subfamily A (NHE7, cation proton antiporter 7), member 7 (SLC9A7), transcript variant 1, mRNA [NM_001257291]	chrX:46458828-46458769	hs|Xp11.23	TTTCCCTCACTGAGAGGTTCTTTTCTGGGTGTAAGCTATTCCTCTCCAGCTTTCTTTAGG
A_21_P0006609	LINC00264	645528	NR_026793	4.5527	6.48948	3.85757	6.48554	5.48758	7.6743	5.5844	7.53209	48.1769	231.137	38.1189	184.488	P	P	P	P	0	NR_026793	NR_026793	Hs.634511	long intergenic non-protein coding RNA 264	ENST00000412114	THC2503504		Homo sapiens long intergenic non-protein coding RNA 264 (LINC00264), long non-coding RNA [NR_026793]	chr10:26881850-26882876	hs|10p12.1	ATTTTATACCCGGTGAACCAGCCAACTTTCATGCAGTTGAGAAAAGTATAAGAAGCCAGC
A_21_P0007051	lnc-APBB1IP-1			4.41375	6.90356	3.65724	6.90459	5.91514	8.05714	6.03228	7.90304	65.4125	299.061	52.0517	239.442	P	P	P	P	0	lnc-APBB1IP-1:4			lnc-APBB1IP-1:4				LNCipedia lincRNA (lnc-APBB1IP-1), lincRNA [lnc-APBB1IP-1:4]	chr10:26881851-26881910	hs|10p12.1	TTTTATACCCGGTGAACCAGCCAACTTTCATGCAGTTGAGAAAAGGTAAACTGTCCAGAT
A_21_P0007126				4.55046	5.84327	1.36314	5.95342	4.85161	7.03762	5.73415	6.18108	30.8698	151.32	42.2469	72.1585	P	P	P	P	0	ENST00000511677		Hs.587688		ENST00000511677	THC2634418		Homo sapiens cDNA FLJ34677 fis, clone LIVER2002660. [AK091996]	chr11:67658752-67658811	hs|11q13.2	GAAATCTTTGATGGAATTAGCCATGCAGAACAGATATTAAATGCATCCTCATTCTTCTCA
A_21_P0007221	LOC101927056	101927056	NR_125395	5.72615	6.29392	1.87357	7.04328	5.15978	7.67734	6.60492	7.51072	38.608	231.607	78.0524	181.821	P	P	P	P	0	NR_125395	NR_125395	Hs.446495	uncharacterized LOC101927056	ENST00000529069	THC2562319		Homo sapiens uncharacterized LOC101927056 (LOC101927056), transcript variant 1, long non-coding RNA [NR_125395]	chr3:125546174-125546115	hs|3q21.2	AGGCACTTTGAGCTACAGATGAGTTTAAATACTTTGTGTTTTTCTTAGTCAAACATGTGC
A_21_P0007223	LOC101927056	101927056	NR_125395	6.54516	6.03973	1.57436	6.93223	4.83469	7.54512	6.61258	7.26734	30.3598	212.044	78.4133	153.919	P	P	P	P	0	NR_125395	NR_125395	Hs.650312	uncharacterized LOC101927056	ENST00000529069	THC2574926		Homo sapiens uncharacterized LOC101927056 (LOC101927056), transcript variant 1, long non-coding RNA [NR_125395]	chr3:125546146-125546087	hs|3q21.2	ATACTTTGTGTTTTTCTTAGTCAAACATGTGCAATTAAGCATGTGATAAATGATATGATG
A_21_P0007481	LINC00944	387895	NR_033878	24.4557	7.27962	1.76905	9.22177	5.33009	9.94219	8.81946	9.64244	43.1634	1037.29	354.394	771.957	P	P	P	P	0	NR_033878	NR_033878	Hs.534660	long intergenic non-protein coding RNA 944	ENST00000540684	THC2725890		Homo sapiens long intergenic non-protein coding RNA 944 (LINC00944), long non-coding RNA [NR_033878]	chr12:127216911-127215313	hs|12q24.32	AGGCATATTTTCATCTGACTTTGATCTCAATGGCGGGAACACCTTCATGGCCCCTTTATA
A_21_P0007489	LOC100507616	100507616	XR_110328	-1.56462	7.5039	-5.27707	7.34622	7.83375	7.18794	8.64344	6.2437	256.185	166.368	314.656	75.06	P	P	P	P	0	ENST00000504409	XR_110328	Hs.339918	uncharacterized LOC100507616	ENST00000504409	THC2602196		PREDICTED: Homo sapiens uncharacterized LOC100507616 (LOC100507616), transcript variant X1, ncRNA [XR_110328]	chr12:92876426-92876485	hs|12q22	TCACAGTGATGGATGGAGTATTTCAACCACAATGGCAAAGAATGAATTACCGGCAGTGTC
A_21_P0007548	lnc-FAM113B-5			-4.24745	6.1895	-2.02061	6.19498	7.32011	5.23351	6.72312	5.70833	177.892	44.5187	84.6808	51.6248	P	P	P	P	0	lnc-FAM113B-5:1			lnc-FAM113B-5:1				LNCipedia lincRNA (lnc-FAM113B-5), lincRNA [lnc-FAM113B-5:1]	chr12:47270373-47270432	hs|12q13.11	GCTTACGGTTGAGATACATGTTGCTATGGCAGCAGGAAGAAAATGATGGAAAAGAAGAAA
A_21_P0007624	lnc-ISCU-1			-12.0412	7.46389	-8.44627	8.05279	9.47164	5.88173	9.73772	6.65941	861.18	69.673	680.179	99.5459	P	P	P	P	0	lnc-ISCU-1:3			lnc-ISCU-1:3				LNCipedia lincRNA (lnc-ISCU-1), lincRNA [lnc-ISCU-1:3]	chr12:109036464-109036523	hs|12q24.11	ACATTTCACACGTCACGTTTCAAATAGAGGCAGCAGCTGCAGCTGAGATGAAGCATATCA
A_21_P0007835	lnc-ARID2-2			-1.55358	5.84048	-4.57703	5.9528	6.16692	5.53132	7.15028	4.95587	77.7823	54.9572	112.213	31.0533	P	P	P	P	0	lnc-ARID2-2:1			lnc-ARID2-2:1				LNCipedia lincRNA (lnc-ARID2-2), lincRNA [lnc-ARID2-2:1]	chr12:46804805-46805959	hs|12q13.11	AATAGAGTCACCACAGGTGGAAACATAACACTTGTCAAGAGTTCCGGTAGGAACATGGAG
A_21_P0007869	lnc-RP11-277P12.7.1-3			158.979	7.75587	96.3679	7.58788	4.91818	12.2309	4.97728	11.5678	32.3597	4784.07	24.932	2892.09	P	P	P	P	0	lnc-RP11-277P12.7.1-3:1			lnc-RP11-277P12.7.1-3:1				LNCipedia lincRNA (lnc-RP11-277P12.7.1-3), lincRNA [lnc-RP11-277P12.7.1-3:1]	chr12:10433127-10433068	hs|12p13.2	CGTGAACATCATCCTGCTGCCCTACACAATATTGTCTAGACTATGGGTAGCTAAAAAATC
A_21_P0007870	KLRAP1	10748	NR_028045	4.43515	6.36734	3.95623	6.18411	5.38288	7.53186	5.27112	7.25525	44.8222	210.179	30.6659	152.454	P	P	P	P	0	NR_028045	NR_028045	Hs.159297	killer cell lectin-like receptor subfamily A pseudogene 1	ENST00000510134	NP831366		Homo sapiens killer cell lectin-like receptor subfamily A pseudogene 1 (KLRAP1), non-coding RNA [NR_028045]	chr12:10748291-10746550	hs|12p13.2	CAAAGGCAAATTCTCTGAAGACCACGGGTCCTGTTGTGGAGTAAACTGTTATTATTTTAC
A_21_P0007916	DNAJC3-AS1	100289274	XR_172013	-4.01366	7.30056	-5.84313	7.28496	8.37153	6.3666	8.66878	6.12204	381.281	94.9222	320.076	69.2611	P	P	P	P	0	ENST00000499499	XR_172013	Hs.594844	DNAJC3 antisense RNA 1 (head to head)	ENST00000499499	THC2497762		DNAJC3 antisense RNA 1 (head to head) [Source:HGNC Symbol;Acc:HGNC:39808] [ENST00000499499]	chr13:96325258-96325199	hs|13q32.1	ACAGAGATAACAGTTGCCTAAGCCAGCTCTTTTCTCCTCTTTTTGATGTTCTTCTTTTTC
A_21_P0007934				4.13781	6.28888	1.62786	6.25999	5.34734	7.39621	5.91837	6.62134	43.7797	192.27	48.1911	97.1249	P	P	P	P	0	ENST00000426509				ENST00000426509			long intergenic non-protein coding RNA 407 [Source:HGNC Symbol;Acc:HGNC:42739] [ENST00000426509]	chr13:45275093-45275152	hs|13q14.12	TCAGGACAAAGCCAGCTCTGTCTCCTGTACCAACCTTGCATGAAAAACAACCAAGGAAAT
A_21_P0008051				-1.07016	4.50451	-6.79044	5.83913	4.55369	4.45586	7.38214	4.61864	24.5059	24.7554	130.721	24.8512	P	P	P	P	0	ENST00000441430				ENST00000441430	THC2684040		long intergenic non-protein coding RNA 366 [Source:HGNC Symbol;Acc:HGNC:42688] [ENST00000441430]	chr13:39152937-39152996	hs|13q13.3	TCTCTCCAAACCGCTCTTGTCAGAATCTGCCTGGGTGAGCCTTTTTGAAATATATCTCCT
A_21_P0008060	TPT1-AS1	100190939	NR_024458	-65.508	8.16713	-1.40546	4.92473	11.7233	5.6897	5.17637	4.68533	4479.88	61.232	28.5793	25.7784	M	P	P	P	0	NR_024458	NR_024458	Hs.375766	TPT1 antisense RNA 1		THC2523858		Homo sapiens TPT1 antisense RNA 1 (TPT1-AS1), long non-coding RNA [NR_024458]	chr13:45944258-45944317	hs|13q14.13	CTTCCTAAAATAGAGCTCTCAAAACCTGGCTGTTTTCCTTCAGAGCACTGGCCTCCAATT
A_21_P0008066	lnc-OLFM4-2			-7.86867	6.12269	-24.9291	6.90728	7.78899	4.81287	9.60633	4.96657	248.038	33.1162	620.405	31.2798	P	P	P	P	0	lnc-OLFM4-2:1			lnc-OLFM4-2:1				LNCipedia lincRNA (lnc-OLFM4-2), lincRNA [lnc-OLFM4-2:1]	chr13:54349060-54349119	hs|13q14.3	ATCTGCTCTGGTCCTGCTTCTAAATGATTGTGCTACTTTGAGAAAGTCATCTAACATCAG
A_21_P0008121	lnc-SOX1-4			-2.1187	5.5403	-19.1488	6.77681	6.1083	5.02512	9.23313	4.97395	74.6203	38.6819	473.894	31.3775	P	P	P	P	0	lnc-SOX1-4:1			lnc-SOX1-4:1		THC2744504		LNCipedia lincRNA (lnc-SOX1-4), lincRNA [lnc-SOX1-4:1]	chr13:112548600-112548659	hs|13q34	TGACAAAAGACATCATTCTACGCTGCACAAAAGCAGCCAGAGGCGGCCTCTCCCACGCTC
A_21_P0008205	lnc-GPR183-2			-2.63961	6.05338	-4.97658	6.12467	6.7939	5.39358	7.39068	5.07552	121.206	49.9007	131.586	33.5346	P	P	P	P	0	lnc-GPR183-2:4		Hs.648968	lnc-GPR183-2:4		THC2502639		LNCipedia lincRNA (lnc-GPR183-2), lincRNA [lnc-GPR183-2:4]	chr13:100147661-100147602	hs|13q32.3	TGCTTTAAGTGGGATAGAAAAACCTTAAGGAAAGTTCATAGTAGGTCCTCAGTGGTGGAG
A_21_P0008277	LOC101928075	101928075	NR_110071	-2.52139	5.66907	-4.50249	6.13648	6.3753	5.04108	7.31709	5.14637	90.8931	39.1104	125.42	34.9895	P	P	P	P	0	NR_110071	NR_110071	Hs.737532	uncharacterized LOC101928075	ENST00000500016	THC2621588		Homo sapiens uncharacterized LOC101928075 (LOC101928075), long non-coding RNA [NR_110071]	chr14:71075577-71075518	hs|14q24.2	TTATATGGCCATTCTGTACCCACCCACAACTGAGAGCTGAATGCATAAATAAATGAAGAC
A_21_P0008398	lnc-CTD-2134A5.2.1-2			-2.67024	7.69848	-11.1613	8.20844	8.43949	7.02252	10.1311	6.65066	401.237	149.882	896.89	99.0804	P	P	P	P	0	lnc-CTD-2134A5.2.1-2:1			lnc-CTD-2134A5.2.1-2:1				LNCipedia lincRNA (lnc-CTD-2134A5.2.1-2), lincRNA [lnc-CTD-2134A5.2.1-2:1]	chr14:104346608-104346667	hs|14q32.33	TTGGGACCTGTGCCCGGGAACAATGATCTCCGACACATTATTTTGTGTAAAATCACTTTT
A_21_P0008402	lnc-C14orf79-2			-5.52839	7.84139	-2.66717	7.87212	9.17124	6.70438	8.61152	7.19621	692.153	120.962	309.008	146.63	P	P	P	P	0	lnc-C14orf79-2:2			lnc-C14orf79-2:2				LNCipedia lincRNA (lnc-C14orf79-2), lincRNA [lnc-C14orf79-2:2]	chr14:105562193-105562252	hs|14q32.33	ATGCAGTTGGTGCCTCCATCTGCTCCTGTGTGGTTTCTTCTTTTGGTTCCTTTATTATCT
A_21_P0008404	LOC102723354	102723354	NR_110546	1.83139	6.87591	-4.4097	8.10496	6.45328	7.32621	9.24566	7.10498	96.3305	183.102	479.019	136.703	P	P	P	P	0	NR_110546	NR_110546	Hs.569410	uncharacterized LOC102723354	ENST00000548361	THC2768708		Homo sapiens uncharacterized LOC102723354 (LOC102723354), long non-coding RNA [NR_110546]	chr14:105561996-105562055	hs|14q32.33	TTTCCAGCTTTCTGTGCCCTAAATAAACTTCTGCTGGGATTGAGCCATCAGCATTCTGTG
A_21_P0008517	LOC100506476	100506476	NR_109995	-1.62858	6.33606	-6.86705	7.10797	6.69763	5.99401	8.63242	5.85273	113.358	74.7536	312.481	56.7831	P	P	P	P	0	NR_109995		Hs.287299	uncharacterized LOC100506476		THC2640786		Homo sapiens uncharacterized LOC100506476 (LOC100506476), long non-coding RNA [NR_109995]	chr14:74269958-74270017	hs|14q24.3	CAAAACATTTCAAAGAGTCCACATGACAGTAGTGTTCATTTTGGCATCTGTTGATTTAAC
A_21_P0008550	lnc-BCL11B-1			8.70127	8.60895	2.83414	8.13326	7.18865	10.3099	7.41645	8.91936	162.202	1321.12	134.186	479.685	P	P	P	P	0	lnc-BCL11B-1:3			lnc-BCL11B-1:3				LNCipedia lincRNA (lnc-BCL11B-1), lincRNA [lnc-BCL11B-1:3]	chr14:99751043-99750984	hs|14q32.2	TACCAGTTTGAATCTGCCTAGGACACTAAGGCTCCCACCCCCTAATTTACCTTATAAATT
A_21_P0008670	LINC00925	254559	NR_015411	10.35	6.95749	15.1151	6.14611	5.47303	8.84458	4.4918	8.40971	47.6366	500.784	18.7583	339.155	P	P	P	P	0	NR_015411	NR_015411	Hs.136313	long intergenic non-protein coding RNA 925	ENST00000536780	THC2601829		Homo sapiens long intergenic non-protein coding RNA 925 (LINC00925), long non-coding RNA [NR_015411]	chr15:89941625-89941684	hs|15q26.1	AGTACTAGGGCCAGCTCTGGGAGAGGTCTCTTCCTATGCTGTGAACCCCCTGCCTTTCTT
A_21_P0008801	lnc-ADAMTS17-1			4.30074	5.45318	2.14641	4.86457	4.50149	6.60607	4.34471	5.44664	23.3906	112.416	17.1065	43.0661	P	P	P	P	0	lnc-ADAMTS17-1:6			lnc-ADAMTS17-1:6				LNCipedia lincRNA (lnc-ADAMTS17-1), lincRNA [lnc-ADAMTS17-1:6]	chr15:100889531-100889258	hs|15q26.3	GAAAACAGGGTCGGAAAAGATCTCAGTCCTCTATCTGTGAAACGGAATTCGGCCTTGCCT
A_21_P0008876			XR_243482	-3.39391	6.04276	-4.5084	7.46305	6.98819	5.22524	8.628	6.45539	140.488	44.2462	311.717	86.9625	P	P	P	P	0	ENST00000562180	XR_243482	Hs.710001		ENST00000562180	THC2747048			chr16:81773923-81773982	hs|16q23.3	TATGTGACGTAGGCACAGCCAATGACTGCATCCCAGTGCTTCGACCAGTCACAGGGTCAA
A_21_P0008936	LOC101927334	101927334	NR_110913	6.56909	7.00844	3.82215	6.1472	5.78092	8.49662	5.25563	7.19001	59.3825	399.021	30.3758	145.88	P	P	P	P	0	NR_110913	NR_110913		uncharacterized LOC101927334	ENST00000568607	THC2675915		Homo sapiens uncharacterized LOC101927334 (LOC101927334), long non-coding RNA [NR_110913]	chr16:51069611-51069670	hs|16q12.1	CCTGACTTATTAATTTGATTTCTGTCCTCCCCTCATGGAAGTTAATTAAAGGAATGCGAG
A_21_P0009114	LOC101928659	101928659	XR_243494	-2.42637	7.325	-6.42811	7.57185	7.99226	6.71346	9.03209	6.34769	286.9	121.76	411.364	80.51	P	P	P	P	0	XR_243494	XR_243494		uncharacterized LOC101928659		THC2669701		PREDICTED: Homo sapiens uncharacterized LOC101928659 (LOC101928659), ncRNA [XR_243494]	chr16:87351581-87351640	hs|16q24.2	GCAGTTGCTGACGTGGAGACAGGACGTATGTCTTCATATTTTAGTAAAACCCAATGCCCT
A_21_P0009240				16.603	7.184	6.54327	7.69078	5.43771	9.49108	6.45423	9.16424	46.4255	772.796	69.9795	561.079	P	P	P	P	0	ENST00000585387		Hs.569799		ENST00000585387				chr17:33650234-33651678	hs|17q12	CATTTGCTTGGACCCACTGCATTCCATCCCTTGTGGAAGAGAGCATGTAAGCAAGACAGG
A_21_P0009265	LOC100507002	100507002	NR_110801	-7.27615	6.31062	-5.54026	7.55762	7.90256	5.03938	8.89283	6.42288	268.954	39.0719	370.857	85.1211	P	P	P	P	0	NR_110801	NR_110801	Hs.729924	uncharacterized LOC100507002	ENST00000582940	THC2644838		Homo sapiens uncharacterized LOC100507002 (LOC100507002), long non-coding RNA [NR_110801]	chr17:63106959-63107018	hs|17q24.1	TGGAACAGACTGCAGTTCTCTTCTACAAATCAATCTAGACTGGACAGACAGAACTCCAAG
A_21_P0009266				3.32102	8.03997	5.75616	7.65037	7.22064	8.95227	6.4913	9.01641	165.961	536.951	71.8136	512.404	P	P	P	P	0	ENST00000612725				ENST00000612725	THC2673276			chr17:66184932-66184991	hs|17q24.2	ATGTGTCACTGTGTAAGTTACCACTGCAATATCTTCTGTATGTTGAAAAACTGGTACTTA
A_21_P0009267	LINC01482	101928104	NR_110825	-7.25645	6.43461	-4.26421	6.27881	8.02114	5.16188	7.4115	5.31922	292.554	42.5493	133.613	39.3691	P	P	P	P	0	NR_110825		Hs.569826	long intergenic non-protein coding RNA 1482	ENST00000585484	NP1168235		Homo sapiens long intergenic non-protein coding RNA 1482 (LINC01482), long non-coding RNA [NR_110825]	chr17:66638824-66638883	hs|17q24.2	AGACTTCCTTGTTCGTGTCTATATGGTTCATACATGGCCTTCCCCTTAATTAAAGATGTC
A_21_P0009287	lnc-FSCN2-1			-2.81783	6.96842	-5.93562	6.12772	7.75566	6.26108	7.54564	4.97624	242.273	88.9371	147.337	31.3954	P	P	P	P	0	lnc-FSCN2-1:2			lnc-FSCN2-1:2		THC2721173		ALU7_HUMAN (P39194) Alu subfamily SQ sequence contamination warning entry, partial (11%) [THC2721173]	chr17:79483193-79483252	hs|17q25.3	TAAATGAAACGATGGACCCTGAACAGAAAAAGGAACAGTGGTGGAAGAACTAGCAAAGCC
A_21_P0009315	lnc-SLC35G3-1			6.65274	7.72208	2.15764	7.13687	6.47517	9.20912	6.60367	7.71312	97.5589	641.695	77.954	210.007	P	P	P	P	0	lnc-SLC35G3-1:2			lnc-SLC35G3-1:2		THC2660571		Q6VEP1_HUMAN (Q6VEP1) F379 retina specific protein, partial (39%) [THC2660571]	chr17:33568561-33568502	hs|17q12	CAAGGATGGTGGCCAGTTAACAGAAAATCAAGGCAGCGGGAAAGGTCTGGAAAACACCAC
A_21_P0009324	lnc-CCR7-1			-1.20872	5.97092	-4.91069	7.44603	6.10923	5.83575	8.68196	6.38603	74.6718	67.2983	323.336	82.9188	P	P	P	P	0	lnc-CCR7-1:2			lnc-CCR7-1:2				LNCipedia lincRNA (lnc-CCR7-1), lincRNA [lnc-CCR7-1:2]	chr17:38689188-38689129	hs|17q21.2	TTTCCTAAGAGTGAATAACTTGGTGCCCTGAAGCTGACCCCTCATCCACTATAAACTGTC
A_21_P0009329	lnc-COPZ2-1			-3.07636	6.83839	-6.29345	6.29486	7.69688	6.07565	7.76012	5.10627	232.594	79.032	170.872	34.0399	P	P	P	P	0	lnc-COPZ2-1:2			lnc-COPZ2-1:2				LNCipedia lincRNA (lnc-COPZ2-1), lincRNA [lnc-COPZ2-1:2]	chr17:46124618-46124321	hs|17q21.32	GAGGTGTCAACTCAACTGTGTCTTCTTAGAAGAGCCCATTATTTATAGGCTGGACTGGAA
A_21_P0009367	lnc-TMEM105-2			-2.09579	7.84719	-4.22314	8.37446	8.39907	7.33157	9.47784	7.39953	388.761	183.886	561.655	168.48	P	P	P	P	0	lnc-TMEM105-2:9		Hs.651390	lnc-TMEM105-2:9		THC2641000		601670942F1 NIH_MGC_20 Homo sapiens cDNA clone IMAGE:3953626 5', mRNA sequence [BF026893]	chr17:79354297-79354238	hs|17q25.3	ACCTCATTTAAAGGTGGGAACTGGGGATCCTGGAACCTCCCCTGCACCCCAGATGCTTCT
A_21_P0009394	lnc-AMZ2-1			3.00519	7.57865	10.8278	6.97114	6.82637	8.41383	5.46146	8.89814	123.878	378.728	35.0927	473.007	P	P	P	P	0	lnc-AMZ2-1:1			lnc-AMZ2-1:1				LNCipedia lincRNA (lnc-AMZ2-1), lincRNA [lnc-AMZ2-1:1]	chr17:66179595-66182891	hs|17q24.2	CGCTGCATCGTAAGGATGGAGGAGCTGTTGTCTCCACAGCTGACAGTTCTAGAAACTGAG
A_21_P0009488	lnc-MALT1-1			-12.9522	8.60555	-13.9778	7.52536	10.6492	6.95409	9.66466	5.8596	2046.95	143.154	647.369	57.0476	P	P	P	P	0	lnc-MALT1-1:1			lnc-MALT1-1:1				LNCipedia lincRNA (lnc-MALT1-1), lincRNA [lnc-MALT1-1:1]	chr18:56327828-56327887	hs|18q21.32	AATAGACTTCTACCTTGATGGAATGGGTTGGACTAACGAGGAACCACCATTACTCCAAGG
A_21_P0009591	lnc-MBP-1			-2.24189	6.07798	-4.41289	6.34152	6.68817	5.52345	7.50216	5.36044	112.617	54.6503	142.627	40.583	P	P	P	P	0	lnc-MBP-1:3			lnc-MBP-1:3				LNCipedia lincRNA (lnc-MBP-1), lincRNA [lnc-MBP-1:3]	chr18:74528854-74528795	hs|18q23	TTCATCTGCTTCTGCCAGGTTCCTGGCATTCTGTGACCACCTTTGTTTTATTTCAGACTG
A_21_P0009655	MGC45922	284365	NR_038359	-5.31165	7.64442	-12.7334	7.69322	8.94333	6.53417	9.74437	6.07382	584.684	106.66	684.422	66.6086	P	P	P	P	0	NR_038359		Hs.161397	uncharacterized LOC284365	ENST00000326989	THC2626397		Homo sapiens uncharacterized LOC284365 (MGC45922), long non-coding RNA [NR_038359]	chr19:51322065-51322124	hs|19q13.33	ATGGCTTGCAATAACATCCCTCTGTACCTTTTCTGGCTTCCCCGCCACAATAAAACCTCT
A_21_P0009735	LOC102723811	102723811	XR_430169	-3.87238	5.91727	-5.12163	5.89151	6.97393	5.02071	7.18649	4.82988	139.223	38.5145	114.966	28.2263	P	P	P	P	0	XR_430169	XR_430169	Hs.681227	uncharacterized LOC102723811		THC2638611		PREDICTED: Homo sapiens uncharacterized LOC102723811 (LOC102723811), ncRNA [XR_430169]	chr19:1246420-1246361	hs|19p13.3	AATGGACACCATCACCTCAGTCTGGTCGGGAGTGGAATGGGACACGGGTTGTCGGAACTT
A_21_P0009830	lnc-CSRP2BP-1			-4.45375	8.16983	-2.26205	8.00601	9.31809	7.16307	8.61645	7.43882	769.8	163.802	309.661	173.088	P	P	P	P	0	lnc-CSRP2BP-1:1			lnc-CSRP2BP-1:1		THC2700888		LNCipedia lincRNA (lnc-CSRP2BP-1), lincRNA [lnc-CSRP2BP-1:1]	chr20:18051593-18051652	hs|20p11.23	GGTGTCTCATCGTCCCCACCCCACTGTAATTCAAAATAAAAACAATGCTAAACCACAAAA
A_21_P0009873	LOC100505771	100505771	XR_109592	5.91588	11.044	2.06443	11.1121	9.83586	12.4004	10.6016	11.6473	1127.61	5315.8	1234.14	3056.64	P	P	P	P	0	XR_109592	XR_109592	Hs.448392	uncharacterized LOC100505771		THC2638819		PREDICTED: Homo sapiens uncharacterized LOC100505771 (LOC100505771), transcript variant 2, ncRNA [XR_109592]	chr20:62259802-62259861	hs|20q13.33	GGTTCCCAAGCCACTGCACTTCGGAGGGGCTGTAATTAGAGTTGCACATTCATTCAGTTC
A_21_P0009928	lnc-STK35-2			-3.32729	5.81967	-4.7088	7.17935	6.7511	5.01675	8.38351	6.14815	117.602	38.432	262.507	70.6145	P	P	P	P	0	lnc-STK35-2:5		Hs.132163	lnc-STK35-2:5		THC2728094		DA407032 BRTHA3 Homo sapiens cDNA clone BRTHA3012496 5', mRNA sequence [DA407032]	chr20:2188598-2193577	hs|20p13	TGTTGGTTCCCTCTGAAAGTGCTGATAATGATAGCAGGAGCACCATTGAAGGAGAATTAG
A_21_P0009993	LOC100505771	100505771	XR_109592	4.01662	9.14071	2.23319	8.88927	8.19259	10.1986	8.32859	9.48769	331.808	1219.62	252.446	700.537	P	P	P	P	0	XR_109592	XR_109592	Hs.448392	uncharacterized LOC100505771		THC2613518		PREDICTED: Homo sapiens uncharacterized LOC100505771 (LOC100505771), transcript variant 2, ncRNA [XR_109592]	chr20:62260103-62260162	hs|20q13.33	TCACGCGGTCTATGTGTGTCATTTATCTGAGTTTGCCTATCGTCACGTTTTGGAAATAAA
A_21_P0010215	LOC101928576	101928576	XR_244329	2.66163	5.56078	6.38312	5.79695	4.89928	6.31159	4.61203	7.28629	31.9488	91.648	19.9777	156.221	P	P	P	P	0	ENST00000424921	XR_244329	Hs.400131	uncharacterized LOC101928576	ENST00000424921	THC2665577		PREDICTED: Homo sapiens uncharacterized LOC101928576 (LOC101928576), transcript variant X1, ncRNA [XR_244329]	chr21:45579872-45579813	hs|21q22.3	AACCGACCTTTTGGAGACATTCTGTGCCCTCAACAAAAGCGGCCCCTGTCTGGAAACCCC
A_21_P0010328	LOC101928891	101928891	NR_110537	4.27145	6.88086	2.37538	7.73534	5.91275	8.00747	7.1364	8.38455	65.2284	289.617	111.218	332.807	P	P	P	P	0	NR_110537	NR_110537		uncharacterized LOC101928891	ENST00000444039			Homo sapiens uncharacterized LOC101928891 (LOC101928891), long non-coding RNA [NR_110537]	chr22:21318788-21318847	hs|22q11.21	ATGAAACACCCAAGTGTTAGGAACCAGAATAATCAGCCCTAATAGAGGGGAGGCTGATCA
A_21_P0010440	lnc-MFNG-1			1.48001	7.09657	5.60846	5.64646	6.8194	7.385	4.53803	7.02563	123.433	190.707	19.1754	129.018	P	P	P	P	0	lnc-MFNG-1:2			lnc-MFNG-1:2				LNCipedia lincRNA (lnc-MFNG-1), lincRNA [lnc-MFNG-1:2]	chr22:37861569-37861510	hs|22q13.1	CCAAGCCTTCTTAGTATCACCCAGAAAGCGTTCTTAGTATGCTCCAGATGTGATCCCATA
A_21_P0010444	lnc-NFAM1-1			-3.05092	5.58444	-4.36116	5.77466	6.44673	4.83748	6.93392	4.80921	95.8743	33.614	97.2918	27.813	P	P	P	P	0	lnc-NFAM1-1:1			lnc-NFAM1-1:1				LNCipedia lincRNA (lnc-NFAM1-1), lincRNA [lnc-NFAM1-1:1]	chr22:42833507-42833448	hs|22q13.2	GGCCCGAGCCTCCCAGAACCTTGGCACATGGTGGACGTGGAATAAATGTTGAAAATTGTG
A_21_P0010469	CHKB-AS1	100144603	NR_110536	1.03304	6.42453	-5.17717	5.50208	6.40113	6.44803	6.81455	4.44238	92.4391	100.437	89.6343	22.3123	P	P	P	P	0	NR_110536	NR_110536	Hs.657275	CHKB antisense RNA 1 (head to head)		THC2734298		Homo sapiens CHKB antisense RNA 1 (head to head) (CHKB-AS1), transcript variant 1, long non-coding RNA [NR_110536]	chr22:51025365-51025741	hs|22q13.33	ATTTTATAGCGAAAGAGCCTTAGGATCTGCTGGATTAGAGCCTGTTTCCCAGGTAGGAAC
A_21_P0010491				-16.6004	8.37875	-7.74897	9.1093	10.6469	6.59377	10.7053	7.75126	2045.31	111.546	1328.12	215.299	P	P	P	P	0	ENST00000623227		Hs.88045		ENST00000623227	THC2503493			chr17_gl000205_random:000036704-000036763		GTTACTCTCCTTTATGTTTCACTTTCTCAAATGAATGTCAAGCAGGTGATTTTCAGATTC
A_21_P0010492				-8.79271	7.2115	-8.01783	7.27649	8.94818	5.81187	8.93142	5.92821	586.66	66.1097	382.151	59.8664	P	P	P	P	0	ENST00000624368		Hs.743984		ENST00000624368	THC2502608			chr7_gl000195_random:46462-46403		GCTGAATTGTGACCTTTCAATTTTACCTGCTTTTCCTGCAAAGTATATTTTGCAGACCCA
A_21_P0010507	LOC100996583	100996583	NR_121638	-3.09324	7.00002	-5.23318	7.20709	7.86181	6.23269	8.49915	6.11146	260.935	87.4756	285.269	68.7752	P	P	P	P	0	NR_121638	NR_121638	Hs.444114	uncharacterized LOC100996583		THC2648044		Homo sapiens uncharacterized LOC100996583 (LOC100996583), long non-coding RNA [NR_121638]	chr1:2514849-2514908	hs|1p36.32	TGCTACTGAGTGGACAAGCTTACATGAAATGACTGTTTTCACATATGTGGCACCAGGCAG
A_21_P0010520			XM_006713169	4.24571	6.04214	-2.69493	7.38095	5.0885	7.1745	8.13064	6.70039	36.6655	165.094	221.995	102.291	P	P	P	P	0	ENST00000544155	XM_006713169	Hs.349110		ENST00000544155	THC2494317		macrophage stimulating 1-like [Source:HGNC Symbol;Acc:HGNC:7390] [ENST00000544155]	chr1:17084648-17084589	hs|1p36.13	TAACAAGTGAGCCTTGGGGCAACGGACTGAGAGTCACAAATGACCTAGCAGAGCTTCTCT
A_21_P0010530				-14.6243	5.91845	-6.92454	5.81097	8.16194	4.29164	7.37212	4.58041	324.523	21.5162	129.877	24.156	P	P	P	P	0	ENST00000424308				ENST00000424308			long intergenic non-protein coding RNA 1358 [Source:HGNC Symbol;Acc:HGNC:50589] [ENST00000424308]	chr1:59487204-59488669	hs|1p32.1	TTAAAGTAGAAGCATCATATTTCTATCAACGTATCCACTGTGCTTGGCAGGGGATGGGCC
A_21_P0010535	XLOC_l2_000297			1.42642	7.98823	8.69046	6.78636	7.73614	8.24854	5.40357	8.523	239.603	339.122	33.6714	365.375	P	P	P	P	0	TCONS_l2_00000385					THC2520127		BROAD Institute lincRNA (XLOC_l2_000297), lincRNA [TCONS_l2_00000385]	chr1:89886811-89886870	hs|1p22.2	GCCTGACTGTGAATCCTGATGAATCAAGCTCAAAAGGAGAAAACATAAAATACATAAAGT
A_21_P0010536	GBP3	2635	NM_018284	-1.39811	8.98788	4.74115	7.09781	9.23286	8.74939	6.06342	8.30866	724.622	468.55	53.2793	315.604	P	P	P	P	0	NM_018284	NM_018284	Hs.720167	guanylate binding protein 3	ENST00000394662	THC2558468	GO:0003924(GTPase activity)|GO:0005515(protein binding)|GO:0005525(GTP binding)|GO:0005737(cytoplasm)|GO:0008152(metabolic process)|GO:0016020(membrane)|GO:0051607(defense response to virus)	Homo sapiens guanylate binding protein 3 (GBP3), mRNA [NM_018284]	chr1:89476648-89476589	hs|1p22.2	TTATTCAGAAGTTACAAGACCTGGAGAAAAAGTACTATGAGGAACCGAGGAAGGGGATAC
A_21_P0010545	LAMTOR5-AS1	101410535	NR_102697	-5.26695	6.97776	-11.6656	6.79615	8.27842	5.88145	8.79549	5.25129	356.136	69.6552	349.053	37.489	P	P	P	P	0	NR_102697			LAMTOR5 antisense RNA 1		THC2540534		Homo sapiens LAMTOR5 antisense RNA 1 (LAMTOR5-AS1), long non-coding RNA [NR_102697]	chr1:110958810-110958869	hs|1p13.3	TGTAAGCCTGTGGACAAATCCTCTGATGCCTTGATACCTCGGTTTTCCCCCACTATAAAT
A_21_P0010562	XLOC_l2_000427			5.53381	8.00781	1.18009	8.0165	6.86822	9.33649	7.89794	8.13684	127.896	700.023	188.376	281.032	P	P	P	P	0	TCONS_l2_00000598		Hs.271249			THC2509199		BROAD Institute lincRNA (XLOC_l2_000427), lincRNA [TCONS_l2_00000598]	chr1:149666033-149666092	hs|1q21.2	AGCAGGCCTGAGACACATGCAGGAAACCAGACAGCCTGGATGAAATTTCTTTCAAGCAAG
A_21_P0010595	FBXO25	26260	NM_183420	10.7029	9.89859	9.18917	9.95655	8.33524	11.7552	8.48431	11.6842	371.275	3469.11	281.673	3139.55	P	P	P	P	0	NM_183420	NM_183420	Hs.438454	F-box protein 25	ENST00000414742	THC2732119	GO:0000151(ubiquitin ligase complex)|GO:0003779(actin binding)|GO:0004842(ubiquitin-protein ligase activity)|GO:0005515(protein binding)|GO:0005634(nucleus)|GO:0005730(nucleolus)|GO:0016567(protein ubiquitination)|GO:0019005(SCF ubiquitin ligase complex)	Homo sapiens F-box protein 25 (FBXO25), transcript variant 2, mRNA [NM_183420]	chr8:385644-385703	hs|8p23.3	CTTTAATCGGTTAGACTTCTCAAGTGCAATTCAAGATATCCGAAGGTTCAATTATGTGGT
A_21_P0010661	XLOC_l2_001196			4.35386	5.42353	-1.74309	5.63331	4.46521	6.58751	6.04838	5.24673	22.9383	110.787	52.7273	37.3835	P	P	P	P	0	TCONS_l2_00001624					THC2776855		BROAD Institute lincRNA (XLOC_l2_001196), lincRNA [TCONS_l2_00001624]	chr1:173392534-173392475	hs|1q25.1	GGATTCAAGCAGGGTCTTGAAGGCTGTGTTTTAATTAAAGAGGTGGAAAAGAAGGGGAAT
A_21_P0010676	XLOC_l2_001331			6.49991	7.13969	9.45473	6.7575	5.91603	8.61645	5.32857	8.56961	65.555	431.438	32.0508	376.37	P	P	P	P	0	TCONS_l2_00001813							BROAD Institute lincRNA (XLOC_l2_001331), lincRNA [TCONS_l2_00001813]	chr1:224218435-224204522	hs|1q42.11	GATATCCGAAGGTTCAATTATGTGGTCAAAAGGCTGGAAAGCTAAAAGCTCCATTTCAGA
A_21_P0010686				-2.80767	6.75741	-7.59636	6.33089	7.54301	6.05363	7.96031	5.035	209.046	77.8298	196.82	32.6072	P	P	P	P	0	ENST00000412115				ENST00000412115	THC2660300		Q6FTS4_CANGA (Q6FTS4) Similarity, partial (15%) [THC2660300]	chr1:745300-745359	hs|1p36.33	GATCACTAAATATGTAGGCAATGCTGGATACTGGGCTGTTATTTACATATTTGTATCACC
A_21_P0010694				-5.34242	5.99989	-5.42532	6.86007	7.32918	4.91169	8.18754	5.74783	179.054	35.2313	230.643	52.9672	P	P	P	P	0	ENST00000431027				ENST00000431027	THC2614212			chr1:20486777-20486836	hs|1p36.12	TAAAAGTTGAAAAACAACAGGAATGAAGTCATTGGCAAGACCAGCCGGTGCCACTGATGA
A_21_P0010721	LINC00869	57234	XR_426752	6.4444	7.10205	2.60612	7.30394	5.88408	8.57213	6.6456	8.0275	63.9957	419.533	80.3261	261.325	P	P	P	P	0	ENST00000430442	XR_426752	Hs.662922	long intergenic non-protein coding RNA 869	ENST00000430442	THC2521817		long intergenic non-protein coding RNA 869 [Source:EntrezGene;Acc:57234] [ENST00000430442]	chr1:149637453-149637512	hs|1q21.2	ATGTGATGGTCCCTTTGGTTTTGGTGCCTCTTCCATGAGCTTCAGATCAGAACTAGCTAT
A_21_P0010724	LOC645166	645166	NR_027354	-1.61859	5.02984	-5.06369	5.74327	5.38919	4.69445	7.03134	4.69115	45.0099	30.3844	103.429	25.8615	P	P	P	P	0	NR_027354	NR_027354	Hs.744183	lymphocyte-specific protein 1 pseudogene	ENST00000544283			Homo sapiens lymphocyte-specific protein 1 pseudogene (LOC645166), transcript variant 1, non-coding RNA [NR_027354]	chr1:148952994-148953053	hs|1q21.2	GATTCCTTTTATCATTTTGTCCAAAGGCTCCACCTTCCTGAATATTACTGCTTTATACCC
A_21_P0010725				-7.4908	5.80761	-8.27576	6.88419	7.43907	4.53394	8.57541	5.52651	194.45	26.4243	301.846	45.3926	P	P	P	P	0	ENST00000457390				ENST00000457390	THC2561048		Q16003_HUMAN (Q16003) Lymphocyte-specific protein 1 (Fragment), complete [THC2561048]	chr1:148933391-148933450	hs|1q21.2	GCAGGCAGGAAATATTAACTTATTTCATTGTCACACGAAACCAGAAGACATAAAACAGTT
A_21_P0010857				3.9406	7.83768	23.1913	7.68176	6.91065	8.88907	5.74175	10.2773	131.606	515.182	42.4875	1188.11	P	P	P	P	0	ENST00000440192				ENST00000440192			syndecan binding protein (syntenin) pseudogene 1 [Source:HGNC Symbol;Acc:HGNC:44684] [ENST00000440192]	chr10:6335196-6335137	hs|10p15.1	AATTGCAGACATACTGTCAACATCTGGGACTCGAGTTACTATTACAATCATGTCTTCTTT
A_21_P0010872	ANTXRLP1	100996567	NR_103827	6.43096	8.49002	16.9543	6.93284	7.253	9.93803	5.18546	9.26904	169.606	1034.18	28.7329	598.662	P	P	P	P	0	NR_103827		Hs.546758	anthrax toxin receptor-like pseudogene 1		THC2661986		Homo sapiens anthrax toxin receptor-like pseudogene 1 (ANTXRLP1), transcript variant 1, non-coding RNA [NR_103827]	chr10:47590675-47590616	hs|10q11.22	GGAAAAACTCCCAGGTATCCCAAAGAGAGGCAGCAGATACAAGAAACAAGGAGATTCAAA
A_21_P0010890	XLOC_l2_002033			1.49224	7.70742	9.44608	7.97853	7.42408	8.00156	6.52145	9.76116	192.266	288.414	73.4448	833.098	P	P	P	P	0	TCONS_l2_00003643							BROAD Institute lincRNA (XLOC_l2_002033), lincRNA [TCONS_l2_00003643]	chr10:81526056-81505786	hs|10q22.3	TTCTCAGAAGACAGAGGGTTTTCTTTTGAGATACTATTTCAACAAATTAGCCCAGTTTTG
A_21_P0010978				5.72361	8.64143	1.73428	8.78295	7.47412	9.99105	8.39475	9.18909	199.319	1070.23	264.318	569.723	P	P	P	P	0	ENST00000501122		Hs.523789		ENST00000501122	THC2536499		nuclear paraspeckle assembly transcript 1 (non-protein coding) [Source:HGNC Symbol;Acc:HGNC:30815] [ENST00000501122]	chr11:65194123-65194182	hs|11q13.1	ATGTAGGAGAGCATGGTAACCACAGATAGAACTGGTATTATCCCAAGTGGTCTGCAGACT
A_21_P0010979			XM_006718754	-6.43232	8.50626	-22.0534	8.90967	9.95425	7.26891	11.4163	6.95339	1231.48	176.41	2161.12	122.734	P	P	P	P	0	ENST00000619960	XM_006718754	Hs.433026		ENST00000619960	THC2564062		PREDICTED: Homo sapiens putative ubiquitin-like protein FUBI-like protein ENSP00000310146-like (LOC101927789), transcript variant X2, mRNA [XM_006718754]	chr11:65222947-65223006	hs|11q13.1	AAGGTTGTGCTTCTGGCAGGTTCTCCCTTACAGAATGAAGCCACCCTGGGTCAGTGTGGG
A_21_P0010997	LOC283140	283140	XM_006709955	3.26427	7.22927	5.56651	7.46058	6.42609	8.13285	6.32428	8.80105	94.2254	314.205	64.329	439.935	P	P	P	P	0	ENST00000532168	XM_006709955	Hs.503862	uncharacterized LOC283140	ENST00000532168	THC2749343			chr11:112162365-112162424	hs|11q23.1	CAGGAGTGAGGTTTTTATCTTTTAAAGGACAGGCCCCTACTCTCCTACGTAATGAGTTTC
A_21_P0011013	XLOC_l2_002729			1.59852	6.34443	4.68166	5.84876	6.01508	6.69181	4.84031	7.06733	70.2506	119.87	23.0402	132.656	P	P	P	P	0	TCONS_l2_00005134					THC2737662		BROAD Institute lincRNA (XLOC_l2_002729), lincRNA [TCONS_l2_00005134]	chr11:78133818-78133759	hs|11q14.1	ACAACCATTTTTAAAAGTGGAACTGCACAGGATTACCTCAGCCTGCTAAGTCCTTCCAGC
A_21_P0011031	LOC101928865	101928865	NR_120564	2.76662	6.7985	10.8485	5.91726	6.10395	7.57208	4.44238	7.8818	74.446	216.24	18.0909	235.314	P	P	P	P	0	NR_120564		Hs.407574	uncharacterized LOC101928865	ENST00000513207	THC2612143		Homo sapiens uncharacterized LOC101928865 (LOC101928865), long non-coding RNA [NR_120564]	chr11:78135832-78135773	hs|11q14.1	CCAGCAAAAAGAAGTGGAACTGACTAGTGAGATGGTGGTGAGATTTTCTTTGGTGGCTGT
A_21_P0011036	LOC374443	374443	NR_046444	3.80531	10.5655	91.6911	7.91354	9.6454	11.5734	5.29913	11.8178	978.716	3079.88	31.3635	3430.58	P	P	P	P	0	NR_046444	NR_046444	Hs.659158	C-type lectin domain family 2, member D pseudogene	ENST00000545363	THC2510602		Homo sapiens C-type lectin domain family 2, member D pseudogene (LOC374443), transcript variant 1, non-coding RNA [NR_046444]	chr12:9809582-9809641	hs|12p13.31	TCTACATGAACAGAAAATGGATTTGTAGCAAGCCAAACAATTATGTCTACAGTTGCCAGT
A_21_P0011084	XLOC_l2_003293			1.33279	6.47257	15.2668	7.48563	6.26866	6.68311	5.77338	9.7057	84.0488	119.238	43.6244	799.911	P	P	P	P	0	TCONS_l2_00006125					THC2548537		BROAD Institute lincRNA (XLOC_l2_003293), lincRNA [TCONS_l2_00006125]	chr12:9552468-9552409	hs|12p13.31	TCTTCAAAGCTTGAAAACAAGGGCCAAGTGATGAAGACTGAAGTCAAGAATGACCATGTT
A_21_P0011176	XLOC_l2_003897			1.43713	7.06981	-8.80546	8.15192	6.81305	7.33624	9.87077	6.73238	122.859	184.763	750.586	105.001	P	P	P	P	0	TCONS_l2_00007064					THC2675404		BROAD Institute lincRNA (XLOC_l2_003897), lincRNA [TCONS_l2_00007064]	chr13:21877494-21877435	hs|13q12.11	TTTTCCTTGACATGAGTAACCAAGAGTCGGCTCCTTCAGGCTGATAGAAAATCCTGCTTC
A_21_P0011216	LINC00539	100652865	NR_103841	1.60109	5.36038	-4.91009	6.86243	5.0316	5.71065	8.10564	5.80989	35.0621	62.0298	217.456	55.1021	P	P	P	P	0	NR_103841	NR_103841		long intergenic non-protein coding RNA 539	ENST00000411525	THC2771431		Homo sapiens long intergenic non-protein coding RNA 539 (LINC00539), transcript variant 2, long non-coding RNA [NR_103841]	chr13:21904772-21904713	hs|13q12.11	ATCTGAACTGCAGAATATCAATTTCCAGACATTCTTCCTAGATGATGCCGTCTGCCACGG
A_21_P0011252				-4.45532	8.19183	-2.0647	7.4553	9.34019	7.18466	7.99658	6.95065	782.196	165.993	201.274	122.504	P	P	P	P	0	ENST00000605130				ENST00000605130				chr14:69329176-69329235	hs|14q24.1	GGTACAAGACTTGAATTGTTTAGTTTTCAGTCTCATTGGATTACACTTCAAGATTAACCC
A_21_P0011288	RERE	473	NM_012102	11.859	6.59958	6.25138	6.54571	5.05249	8.6204	5.35581	7.99998	35.6549	432.782	32.566	256.148	P	P	P	P	0	NM_012102	NM_012102	Hs.463041	arginine-glutamic acid dipeptide (RE) repeats	ENST00000556034	THC2607431	GO:0000118(histone deacetylase complex)|GO:0003682(chromatin binding)|GO:0003700(sequence-specific DNA binding transcription factor activity)|GO:0005515(protein binding)|GO:0005634(nucleus)|GO:0006338(chromatin remodeling)|GO:0006351(transcription, DNA-dependent)|GO:0006355(regulation of transcription, DNA-dependent)|GO:0006607(NLS-bearing substrate import into nucleus)|GO:0007275(multicellular o…	Homo sapiens arginine-glutamic acid dipeptide (RE) repeats (RERE), transcript variant 1, mRNA [NM_012102]	chr1:8716060-8684409	hs|1p36.23	TGAAGATGATGTTGTCTACAGACCAGGAGACTGTGTGTATATCGAGAGTTGGAGGCCAAA
A_21_P0011299	XLOC_l2_004595			6.99202	8.33718	3.40036	8.33506	7.05153	9.85724	7.49884	9.26452	147.451	978.703	142.209	597.245	P	P	P	P	0	TCONS_l2_00008487					THC2554687		BROAD Institute lincRNA (XLOC_l2_004595), lincRNA [TCONS_l2_00008487]	chr15:28984258-28984317	hs|15q13.1	GGAAACCACAGGGGAGTTTCAGGCCAGTCAGCTTTTCATCTTCAACTTTATAACTTTCAC
A_21_P0011314	INAFM2	100505573	NM_001301268	4.85008	9.59322	5.03733	10.4687	8.52159	10.7996	9.36713	11.6998	425.579	1861.27	522.593	3168.03	P	P	P	P	0	NM_001301268		Hs.530791	InaF-motif containing 2		THC2601518	GO:0016021(integral to membrane)	Homo sapiens InaF-motif containing 2 (INAFM2), mRNA [NM_001301268]	chr15:40618588-40618647	hs|15q15.1	ATTCCAAGAATCCTTTGAACTTGTAGAACATCTGGGAGTCCACTTCCCTGTCCTCTTCCT
A_21_P0011347			XM_006709981	-42.3657	10.68	2.79926	7.49464	13.719	8.3142	6.78881	8.27386	18594.1	354.682	88.1048	308.605	P	P	P	P	0	ENST00000455737	XM_006709981	Hs.631647		ENST00000455737	NP660168		immunoglobulin heavy variable 4-4 [Source:HGNC Symbol;Acc:HGNC:5652] [ENST00000455737]	chr15:22473017-22472958	hs|15q11.2	GTCGAGTCACCATATCAGTAGACAAGTCCAAGAACCAGTTCTCCCTGAACCTGAGATCTG
A_21_P0011364	WHAMMP1	100288615	NR_036650	5.25538	10.2431	3.95228	10.7744	9.11594	11.5097	9.8286	11.8113	662.949	2948.01	725.483	3417.22	P	P	P	P	0	NR_036650	NR_036650	Hs.668734	WAS protein homolog associated with actin, golgi membranes and microtubules pseudogene 1	ENST00000454486	THC2552265		Homo sapiens WAS protein homolog associated with actin, golgi membranes and microtubules pseudogene 1 (WHAMMP1), non-coding RNA [NR_036650]	chr15:32815366-32815307	hs|15q13.3	AACTTAGTCATTGACTGTGGTGGGGCTGCAGGACGATAAGAATTCGGAAGTGAAAGAACT
A_21_P0011365				9.59808	6.03126	6.55019	7.17462	4.61662	7.87937	5.94583	8.65737	25.7207	265.786	49.126	397.085	P	P	P	P	0	ENST00000564702				ENST00000564702	THC2522342			chr15:30785805-30785864	hs|15q13.2	TTGAATATATTTTCTACACCATGGTTTCTCAACCAGAGGTGATACAGCACTGTCTCCAAA
A_21_P0011366	XLOC_l2_004867			6.21596	5.81574	11.4048	6.48119	4.64522	7.2812	4.95902	8.47059	26.263	177.604	24.6779	352.974	P	P	P	M	0	TCONS_l2_00008986							BROAD Institute lincRNA (XLOC_l2_004867), lincRNA [TCONS_l2_00008986]	chr15:32808512-32808453	hs|15q13.3	GCAGTGTCAGTTCCTACAGGTTATAACGATCTTAATGATAAACTTAAATAACCGTAACTG
A_21_P0011392	REREP3	646396	NR_033735	7.5066	7.35536	7.19226	7.00809	6.04363	8.95179	5.72793	8.57437	71.4483	536.542	42.0386	377.76	P	P	P	P	0	NR_033735		Hs.451294	arginine-glutamic acid dipeptide (RE) repeats pseudogene 3		THC2607431		Homo sapiens arginine-glutamic acid dipeptide (RE) repeats pseudogene 3 (REREP3), non-coding RNA [NR_033735]	chr15:22570769-22570828	hs|15q11.2	TTGGAGGCCAAACACACTGTATTTCATCTGTAGCATTCAAGACTTCAAACTGGTAAGCAT
A_21_P0011401	LOC100996255	100996255	NR_102756	15.6842	7.86665	6.32629	8.46138	6.12775	10.099	7.23469	9.89605	75.4698	1145.83	118.618	911.75	P	P	P	M	0	NR_102756		Hs.634408	uncharacterized LOC100996255				Homo sapiens uncharacterized LOC100996255 (LOC100996255), long non-coding RNA [NR_102756]	chr15:32868143-32871909	hs|15q13.3	ATCACCGTGTGTTACTGGCACAGATGCATCGGCTAGTGAAGAAAGAAGACATTCAAACTA
A_21_P0011482	XLOC_l2_005490			13.4111	7.30682	26.4534	7.83889	5.6703	9.41565	5.82453	10.5499	54.7951	735.861	45.2726	1432.35	P	P	P	P	0	TCONS_l2_00010170							BROAD Institute lincRNA (XLOC_l2_005490), lincRNA [TCONS_l2_00010170]	chr16:53399767-53399708	hs|16q12.2	CTATGCTTTTTCTGTGGTTCCATTTCATAGAAAGATTTGGGGCGATGTTTCTTTTCCCTT
A_21_P0011533				-6.06126	5.97239	-1.84495	6.36099	7.412	4.81239	6.81811	5.93452	190.591	33.1162	89.8376	60.1481	P	P	P	P	0	ENST00000536958		Hs.745165		ENST00000536958	THC2595453			chr17:21476685-21476626	hs|17p11.2	TCTCCCCTGTTTCTGAGCGGCCTAGATGCCTCTCGGTCTGGCTGAATATCTTCTACGAAG
A_21_P0011713	XLOC_l2_006821			5.2438	7.22684	4.6842	7.76094	6.12972	8.52033	6.72657	8.95437	75.658	405.328	84.7969	491.731	P	P	P	P	0	TCONS_l2_00012703							BROAD Institute lincRNA (XLOC_l2_006821), lincRNA [TCONS_l2_00012703]	chr19:55184057-55184116	hs|19q13.42	TTTACCCCAAGCTGTTGTTCCCCCAGTGACCTCCTGGTAATACAGGAGTTACTAAGAAAT
A_21_P0011714	LILRA6	79168	NM_024318	3.04334	7.92639	4.1113	8.29668	7.16411	8.76977	7.33932	9.37891	159.382	474.807	126.964	644.537	P	P	P	P	0	NM_024318	NM_024318	Hs.688335	leukocyte immunoglobulin-like receptor, subfamily A (with TM domain), member 6	ENST00000611751	NP322453	GO:0002376(immune system process)|GO:0016021(integral to membrane)	Homo sapiens leukocyte immunoglobulin-like receptor, subfamily A (with TM domain), member 6 (LILRA6), transcript variant 1, mRNA [NM_024318]	chr19:54745518-54745459	hs|19q13.42	TACTATTATATGAACACCCCCCAGGTGTGGTCCCACCCCAGTGACCCCCTGGAGATTCTG
A_21_P0011716	XLOC_l2_006832			-4.60925	5.60838	1.24171	4.8786	6.81794	4.61341	4.72493	5.03726	123.237	28.2694	21.3616	32.6416	P	P	P	P	0	TCONS_l2_00012718							BROAD Institute lincRNA (XLOC_l2_006832), lincRNA [TCONS_l2_00012718]	chr19:56122951-56123010	hs|19q13.42	TAAAAATATCTCACTCCAGGATGGCGTTTGGGGTGGGGGTGGAAGAGACACTCACCCCTC
A_21_P0011747	CEACAM21	90273	NM_001288773	1.19757	8.48145	4.10897	5.96875	8.35239	8.6125	5.03578	7.07456	375.287	430.525	25.8615	133.368	P	P	P	P	0	NM_001288773	NM_001288773	Hs.655885	carcinoembryonic antigen-related cell adhesion molecule 21	ENST00000401445	THC2603785	GO:0016021(integral to membrane)	Homo sapiens carcinoembryonic antigen-related cell adhesion molecule 21 (CEACAM21), transcript variant 3, mRNA [NM_001288773]	chr19:42092835-42092894	hs|19q13.2	ACAAACATTTACTGCTGGGTCAACCACAAAGCAGATGTGGTTTCTTAGGTTCCTCTGGGA
A_21_P0011758	XLOC_l2_007097			-4.45275	6.11476	-2.58568	6.16508	7.28629	5.1316	6.88832	5.51778	173.425	41.6229	94.1607	45.1306	P	P	P	P	0	TCONS_l2_00013180							BROAD Institute lincRNA (XLOC_l2_007097), lincRNA [TCONS_l2_00013180]	chr19:51289021-51288962	hs|19q13.33	ATCGCTCTGAGGCCAGATAAATGTAACTGAATCCGCACATCCTGCTCCGCCGACCCACTG
A_21_P0011831	XLOC_l2_007456			6.50031	6.23698	4.77281	6.31729	5.03121	7.73172	5.28968	7.54452	35.0494	240.88	31.1294	186.03	P	P	P	P	0	TCONS_l2_00013854							BROAD Institute lincRNA (XLOC_l2_007456), lincRNA [TCONS_l2_00013854]	chr2:102603720-102603779	hs|2q11.2	TACAAAGGCTGTGTGTGGATGGTGACGCTGAGGTTTTATCTTCAAGTGAGTTGTGCATAT
A_21_P0011915	XLOC_l2_008013			4.67434	8.51933	1.73304	8.73452	7.47927	9.70403	8.34687	9.14017	199.994	886.678	255.324	552.966	P	P	P	P	0	TCONS_l2_00014567							BROAD Institute lincRNA (XLOC_l2_008013), lincRNA [TCONS_l2_00014567]	chr2:49141441-49141382	hs|2p16.3	GCCTGTTTTGAGCCTTTGTATAGGTACCTTCCTGTTTTTGTGACAAACAAGATTTTAAAA
A_21_P0011939				4.49274	10.3921	1.40643	10.8097	9.36465	11.5322	10.5665	11.0585	793.617	2991.16	1204.33	2032.28	P	P	P	P	0	ENST00000431244				ENST00000431244				chr2:97950690-97950749	hs|2q11.2	TCCTGGTCTCGAATCATCCTGATATTCTTCATTTTGTTATTCACATTGGACTAGGGTGAG
A_21_P0011941	XLOC_l2_008163			1.548	5.60882	4.76455	6.21844	5.30246	5.93287	5.19342	7.44576	42.4485	71.9033	28.9515	174.213	P	P	P	P	0	TCONS_l2_00014743							BROAD Institute lincRNA (XLOC_l2_008163), lincRNA [TCONS_l2_00014743]	chr2:103509154-103509095	hs|2q12.1	TAATTTCTAGCCACAGAGCCCCACGCATGCAGTTTTAGTATTATAAAAATGTGAAGACAA
A_21_P0011971				-6.9874	6.63266	-4.28861	6.31819	8.18167	5.37692	7.45514	5.35463	329.388	49.2563	138.057	40.39	P	P	P	P	0	ENST00000419201				ENST00000419201			adenosylhomocysteinase pseudogene 4 [Source:HGNC Symbol;Acc:HGNC:44996] [ENST00000419201]	chr2:139659396-139659337	hs|2q22.1	TGATGTGGAAATGGATGTCAAGTGGCTCAACAAGAACACTGTGGAGAAGGTGAACGTCAA
A_21_P0012050			XR_427580	4.11226	7.96422	4.05933	7.83048	7.0093	9.04923	6.88481	8.90605	142.81	571.887	93.9628	476.086	P	P	P	P	0	ENST00000419394	XR_427580	Hs.471887		ENST00000419394	THC2515016		long intergenic non-protein coding RNA 266-1 [Source:HGNC Symbol;Acc:HGNC:16202] [ENST00000445252]	chr11:104999-104940	hs|11p15.5	TCTAAAGAAGAATCTGAAGTGAAATGACATCAAGAGACCTATCAAGACCTGTATCCAGGA
A_21_P0012053	FLJ43681	388574	NR_029406	2.20604	5.84224	4.57495	5.52876	5.29932	6.44078	4.53965	6.7334	42.3323	99.9549	19.2006	105.09	P	P	P	P	0	NR_029406	NR_029406	Hs.546918	ribosomal protein L23a pseudogene	ENST00000426839	THC2520247		Homo sapiens ribosomal protein L23a pseudogene (FLJ43681), non-coding RNA [NR_029406]	chr17:81176786-81176845	hs|17q25.3	GAATTGTGATCCAAAGCTTTTCCTGATGAGGCACAAAGTTGGAGAAACAAAACGCAAACT
A_21_P0012077				3.78895	8.1962	8.32556	6.73718	7.29144	9.21324	5.37968	8.43722	174.193	643.612	33.0632	344.641	P	P	P	P	0	ENST00000409139		Hs.562920		ENST00000409139	THC2698249		long intergenic non-protein coding RNA 152 [Source:HGNC Symbol;Acc:HGNC:28717] [ENST00000409139]	chr2:87882814-87906119	hs|2p11.2	CATCTTTTCCAACCTTAATGAACTGTATCCTCAAAAGAACACTATCAGACTGGCTCTGCC
A_21_P0012078	MIR4435-1HG	541471	NR_015395	4.2	8.73957	7.58366	7.47308	7.76547	9.83586	6.1532	9.07609	244.22	966.343	56.6367	534.168	P	P	P	P	0	NR_015395	NR_015395	Hs.560805	MIR4435-1 host gene (non-protein coding)	ENST00000612724	THC2746900		Homo sapiens MIR4435-1 host gene (non-protein coding) (MIR4435-1HG), transcript variant 1, long non-coding RNA [NR_015395]	chr2:112125127-112125068	hs|2q13	TGCAGTCACCAGCATCTTTTCCAACCTTAATGAACTGTATCCTCAAAAGAACACTATCAG
A_21_P0012079	MIR4435-1HG	541471	NR_024373	1.88175	12.8929	5.6353	11.8691	12.4449	13.357	10.6872	13.1817	7539.18	10199.6	1309.98	8684.56	P	P	P	P	0	NR_024373	NR_024373	Hs.560805	MIR4435-1 host gene (non-protein coding)	ENST00000409569			Homo sapiens MIR4435-1 host gene (non-protein coding) (MIR4435-1HG), transcript variant 2, long non-coding RNA [NR_024373]	chr2:112186945-112186886	hs|2q13	CAGTCTCTGTGTGTCTTAATCCCTTGTCCTTCATTAAAAGCAAAACTAAAGAAAACAGAA
A_21_P0012080				1.17467	10.1139	6.82502	9.27348	9.99843	10.2307	7.99098	10.7618	1268.55	1252.24	200.631	1650.55	P	P	P	P	0	ENST00000437561		Hs.735628		ENST00000437561	THC2636741		long intergenic non-protein coding RNA 152 [Source:HGNC Symbol;Acc:HGNC:28717] [ENST00000437561]	chr2:87769763-87769822	hs|2p11.2	AGACATCTGCTGCTAATGGATGAGCAGTCAACCTGGACGCAGGAAATCATTTTTTATTTG
A_21_P0012174				-4.24969	14.5512	-5.98659	14.7233	15.6322	13.5449	16.0707	13.489	64763	11474.5	64468.5	10739.5	P	P	P	P	0	ENST00000450472				ENST00000450472			glyceraldehyde-3-phosphate dehydrogenase pseudogene 14 [Source:HGNC Symbol;Acc:HGNC:4160] [ENST00000450472]	chr21:30595041-30595100	hs|21q21.3	TGAGAAGTTCAAAAACAGCCTCAAGATCATCAGCGATGCCTCCTGTACCACCAACTTCTT
A_21_P0012182	ANKRD20A9P	284232	NR_027995	5.0919	9.08727	12.5282	9.74463	7.98871	10.3369	8.09023	11.7373	286.038	1345.14	214.978	3246.13	P	P	P	P	0	NR_027995	NR_027995	Hs.742626	ankyrin repeat domain 20 family, member A9, pseudogene	ENST00000432875	THC2587008		Homo sapiens ankyrin repeat domain 20 family, member A9, pseudogene (ANKRD20A9P), non-coding RNA [NR_027995]	chr13:19415809-19415750	hs|13q11	ATCAGAAAATATATGTCATAGTACATCTTCTTCTGCTGCTGACAGATTAACCCAACAAAG
A_21_P0012183	ANKRD20A5P	440482	NR_040113	5.16089	7.66009	9.96926	8.45825	6.56721	8.93483	6.96062	10.2781	104.01	531.166	98.8047	1188.47	P	P	P	P	0	NR_040113	NR_040113	Hs.632352	ankyrin repeat domain 20 family, member A5, pseudogene	ENST00000432875	THC2587008		Homo sapiens ankyrin repeat domain 20 family, member A5, pseudogene (ANKRD20A5P), non-coding RNA [NR_040113]	chr18:14218441-14218500	hs|18p11.21	AGATTAACCCAACAAAGAAAGATTGGGAAAACATAACCTCAGCAATTTCCCAAGAAACTG
A_21_P0012208	lnc-C21orf58-1			-1.36301	8.30562	-7.03173	7.94529	8.53202	8.08522	9.47584	6.66196	428.93	305.331	561.074	99.6134	P	M	P	M	0	lnc-C21orf58-1:1		Hs.596577	lnc-C21orf58-1:1		THC2618400		Homo sapiens cDNA FLJ45665 fis, clone CTONG2027959. [AK127572]	chr21:47875234-47875175	hs|21q22.3	TGATGAAAGGGGCACTGATGTCACTAAAATATTCAGTGATGGCTCATCTCTGTAGGCAAG
A_21_P0012219	XLOC_l2_009136			1.19666	7.28883	7.76525	6.86338	7.16047	7.41949	5.54231	8.49934	158.867	195.091	37.0988	359.734	P	P	P	P	0	TCONS_l2_00017422							BROAD Institute lincRNA (XLOC_l2_009136), lincRNA [TCONS_l2_00017422]	chr21:15304669-15304586	hs|21q11.2	AGTGGCTGATTCCCTTAAAAAATTAACTATGTTAGAGTCTCCACTGGAAGAAGAGACACG
A_21_P0012220	ANKRD20A11P	391267		3.71578	9.30301	4.27609	10.6804	8.40423	10.2979	9.68353	11.7798	389.851	1310.07	656.255	3337.84	P	P	P	P	0	ENST00000429521			ankyrin repeat domain 20 family, member A11, pseudogene	ENST00000429521			ankyrin repeat domain 20 family, member A11, pseudogene [Source:HGNC Symbol;Acc:HGNC:42024] [ENST00000429521]	chr21:15335073-15323443	hs|21q11.2	ATGGCAATTGAAGGACCTCCTGCAAAACATCCTTCCTTGAAGCCTAGCACTGAAATGGAA
A_21_P0012253			XM_006724933	4.50432	8.36857	1.85767	9.03452	7.35304	9.52435	8.59881	9.49231	182.584	785.744	306.631	703.508	P	P	P	P	0	ENST00000510112	XM_006724933			ENST00000510112			breakpoint cluster region pseudogene 6 [Source:HGNC Symbol;Acc:HGNC:39074] [ENST00000510112]	chr22:21647551-21646547	hs|22q11.21	GCATCGCTCTTTCAGACCCAGTTGCAAAGAAGAGCTGCATGCTCAACCTGCTGTCGTCCC
A_21_P0012255	LOC102724248	102724248	XM_006726834	1.1233	6.34734	-8.06139	6.13684	6.26402	6.43176	7.82433	4.8133	83.8559	99.3785	178.592	27.876	P	P	P	P	0	XM_006726834			uncharacterized LOC102724248				PREDICTED: Homo sapiens uncharacterized LOC102724248 (LOC102724248), mRNA [XM_006726834]	chr22:22012254-22012606	hs|22q11.21	AGAGGGTGGCGAAGTTCTTCTGTGTTGTGCAGGCGGAGCTGAACCATTGCAACAGCATGG
A_21_P0012313	PRODH	5625		-1.12664	5.48158	-4.64797	5.74446	5.56827	5.39624	6.9587	4.7421	50.966	50.0121	98.7002	26.6542	P	P	P	P	0	ENST00000609229		Hs.613849	proline dehydrogenase (oxidase) 1	ENST00000609229		GO:0004657(proline dehydrogenase activity)|GO:0005743(mitochondrial inner membrane)|GO:0005759(mitochondrial matrix)|GO:0006560(proline metabolic process)|GO:0006562(proline catabolic process)|GO:0008631(induction of apoptosis by oxidative stress)|GO:0010133(proline catabolic process to glutamate)|GO:0019470(4-hydroxyproline catabolic process)|GO:0034641(cellular nitrogen compound metabolic proce…	proline dehydrogenase (oxidase) 1 [Source:HGNC Symbol;Acc:HGNC:9453] [ENST00000609229]	chr22:18902109-18902050	hs|22q11.21	AAGACACAAGATGGAAGCCAGGGCGATGTGGCAGAGATGGGTGCCTGCTTTAGACTGGGT
A_21_P0012336	GGTLC1	92086	NM_178311	-1.50388	9.14227	-4.01081	9.9256	9.44135	8.85266	10.978	8.9741	842.946	503.542	1586.8	497.455	P	P	P	P	0	NM_178311	NM_178311	Hs.355394	gamma-glutamyltransferase light chain 1	ENST00000412448	THC2616907	GO:0003840(gamma-glutamyltransferase activity)|GO:0006749(glutathione metabolic process)|GO:0019370(leukotriene biosynthetic process)|GO:0031362(anchored to external side of plasma membrane)	Homo sapiens gamma-glutamyltransferase light chain 1 (GGTLC1), transcript variant A, mRNA [NM_178311]	chrUn_gl000212:000082211-000082152		ACTTTGGGGGACGGGCTTCCCCTGTGAGCAGCAGAGCAGCATAATAAATGAGGCCACTGT
A_21_P0012376	GEMIN2	8487	NM_001009183	-4.34256	7.17095	-3.62928	6.70948	8.30804	6.18949	7.70345	5.84377	363.865	85.0306	163.851	56.4405	P	P	P	P	0	NM_001009183	NM_001009183	Hs.652307	gem (nuclear organelle) associated protein 2	ENST00000418195	NP228798	GO:0000245(spliceosomal complex assembly)|GO:0000375(RNA splicing, via transesterification reactions)|GO:0000387(spliceosomal snRNP assembly)|GO:0005515(protein binding)|GO:0005634(nucleus)|GO:0005654(nucleoplasm)|GO:0005681(spliceosomal complex)|GO:0005730(nucleolus)|GO:0005737(cytoplasm)|GO:0005829(cytosol)|GO:0006397(mRNA processing)|GO:0008380(RNA splicing)|GO:0010467(gene expression)|GO:0032…	Homo sapiens gem (nuclear organelle) associated protein 2 (GEMIN2), transcript variant gamma, mRNA [NM_001009183]	chr14:39591650-39591708	hs|14q21.1	AAGAAGGCTGGAAGAAATTTTCTCTGGGTGAAAAGTTATGTGCTGACGGGGCTGTTGGAT
A_21_P0012393	XLOC_l2_009883			4.51629	8.46873	1.55111	7.9864	7.45071	9.62585	7.67603	8.30932	196.061	838.422	161.187	315.795	P	P	P	P	0	TCONS_l2_00018854							BROAD Institute lincRNA (XLOC_l2_009883), lincRNA [TCONS_l2_00018854]	chr3:129839533-129839592	hs|3q22.1	ATGAGGGGGAAAAGTCAACTTGAAGCAGGACAGGGTCATTGACAATTTCCTGTGATTCCA
A_21_P0012458	LOC100506990	100506990	NR_040092	8.64142	6.52155	2.86999	6.13173	5.14888	8.26015	5.41819	6.93924	38.3328	341.991	34.0701	121.403	P	P	P	P	0	NR_040092	NR_040092	Hs.720324	uncharacterized LOC100506990		THC2473109		Homo sapiens uncharacterized LOC100506990 (LOC100506990), transcript variant 2, long non-coding RNA [NR_040092]	chr8:12294641-12294700	hs|8p23.1	AGGAGGGGATTGGAGTGTGGCTCAAGTTCGGGAGGCGTTACCTGCGGAGGGTTTGAGGCA
A_21_P0012475	XLOC_l2_010489			-1.66444	5.89544	-4.80569	6.00203	6.2744	5.53937	7.24029	4.97554	84.4754	55.2758	119.217	31.3833	P	P	P	M	0	TCONS_l2_00019667							BROAD Institute lincRNA (XLOC_l2_010489), lincRNA [TCONS_l2_00019667]	chr3:193310830-193308119	hs|3q29	AATTCGGAATTAGCCTTGCAGACTCACCCCATCGAGACTTATGACTCATGACTCAAGTGA
A_21_P0012654	LOC101928803	101928803	XR_251551	4.24346	9.67772	2.47598	9.26743	8.6911	10.7763	8.63648	9.94447	487.597	1825.25	313.224	941.954	P	P	P	M	0	XR_251551	XR_251551		uncharacterized LOC101928803		THC2558518		PREDICTED: Homo sapiens uncharacterized LOC101928803 (LOC101928803), transcript variant X2, ncRNA [XR_251551]	chr4:9153631-9153119	hs|4p16.1	ATCTACCACGAAGCTGTTGTTCCACACCAGAACCAAATGAGCGCAAGATCTGACAAAAAA
A_21_P0012708				-1.34885	8.00259	-5.53949	8.48295	8.22136	7.78963	9.80724	7.33748	339.829	250.785	715.341	161.782	P	P	P	P	0	ENST00000508156				ENST00000508156	THC2680540			chr4:190816794-190816735	hs|4q35.2	TGCATAGTGGATGGATTAGTCTGTGGTTCCTGGGATCTTCTGTGTATTCTGTTGAAGCTC
A_21_P0012709	XLOC_l2_011424			-1.21452	5.60588	-4.25418	5.69924	5.74783	5.46744	6.83859	4.74971	58.0024	52.5064	91.0213	26.7371	P	P	P	P	0	TCONS_l2_00021497		Hs.559412			THC2688027		BROAD Institute lincRNA (XLOC_l2_011424), lincRNA [TCONS_l2_00021497]	chr4:190861478-190861419	hs|4q35.2	TGGGCAGGCATTTGCCCGACAGAGATGGAGGAAGCTAGTCCTGTCTGATGGAGGAAACAG
A_21_P0012739	LOC100507487	100507487	NR_125882	-1.29007	5.84455	-5.72781	6.04931	6.03116	5.66371	7.43793	4.91994	70.9795	60.2394	136.511	30.1879	P	P	P	P	0	NR_125882	NR_125882	Hs.549644	uncharacterized LOC100507487	ENST00000511497	THC2608669		Homo sapiens uncharacterized LOC100507487 (LOC100507487), long non-coding RNA [NR_125882]	chr4:129440318-129440377	hs|4q28.2	GATGCTGCAAAACAAATCACTGGTGACTTTCAGTGGCACACAGCAATAAACATTTATTTA
A_21_P0012835	XLOC_l2_011649			-1.28837	8.3319	-4.08508	8.16098	8.51668	8.15113	9.23906	7.20869	424.003	318.2	476.666	147.681	P	P	P	P	0	TCONS_l2_00022387					THC2630830		BROAD Institute lincRNA (XLOC_l2_011649), lincRNA [TCONS_l2_00022387]	chr5:79315837-79315896	hs|5q14.1	GTCTTTTCTGCTTTGTCTTTGCCATTTGCTGTTCTCGCAGCCACATTGTATTCTGTGTCA
A_21_P0012884	LOC728613	728613	NR_003713	-2.63259	8.96135	-4.53863	9.27331	9.68675	8.29027	10.4284	8.24615	1010.54	349.255	1098.43	303.022	P	P	P	P	0	NR_003713	NR_003713	Hs.720393	programmed cell death 6 pseudogene	ENST00000507841	THC2528610		Homo sapiens programmed cell death 6 pseudogene (LOC728613), non-coding RNA [NR_003713]	chr5:1599281-1599222	hs|5p15.33	GTTTCTCATGTTCCTAAGTGCCAGCCCAGAACCATGGAATGTGAAGAAACACAAAACTCA
A_21_P0012944	SMA4	11039	NR_024054	4.59989	8.9972	3.0263	9.22365	7.9635	10.1651	8.4594	10.057	280.937	1193.95	275.962	1020.88	P	P	P	P	0	NR_024054		Hs.654588	glucuronidase, beta pseudogene		THC2511940		Homo sapiens glucuronidase, beta pseudogene (SMA4), transcript variant 2, non-coding RNA [NR_024054]	chr5:69423349-69423290	hs|5q13.2	TTAAAGGAATAATTCTCCTCCGACTCTGCCGTTCCATCCAGTGAAACTCTTCATTCTGGG
A_21_P0012993	NAIP	4671		4.01709	8.49523	2.81559	8.64348	7.55117	9.55732	7.92896	9.42239	210.542	802.042	192.942	665.236	P	P	P	P	0	ENST00000447012		Hs.654588	NLR family, apoptosis inhibitory protein	ENST00000447012	THC2498079	GO:0004842(ubiquitin-protein ligase activity)|GO:0005515(protein binding)|GO:0005524(ATP binding)|GO:0005634(nucleus)|GO:0005737(cytoplasm)|GO:0005876(spindle microtubule)|GO:0006954(inflammatory response)|GO:0007399(nervous system development)|GO:0009966(regulation of signal transduction)|GO:0016323(basolateral plasma membrane)|GO:0016567(protein ubiquitination)|GO:0043027(cysteine-type endopept…	NLR family, apoptosis inhibitory protein [Source:HGNC Symbol;Acc:HGNC:7634] [ENST00000447012]	chr5:70299000-70298941	hs|5q13.2	CTATGTCTCTTACTTCCTCATTCGTCAAAGTACATCTGTGATATTTAAATGCAGGTCTGT
A_21_P0013056	XLOC_l2_012847			2.23069	7.28475	5.90738	6.45275	6.72896	7.88645	5.29746	7.85998	115.844	266.692	31.3097	232.292	P	P	P	P	0	TCONS_l2_00024570					THC2730466		BROAD Institute lincRNA (XLOC_l2_012847), lincRNA [TCONS_l2_00024570]	chr6:2852227-2852168	hs|6p25.2	GAAATTATGACCTGCTGCAGACAGACTTTGTACACTGTGCTATCAGCCAACTGGGCAAAT
A_21_P0013057	XLOC_l2_012847			2.98893	9.00326	6.1049	8.08967	8.24802	9.82765	6.88926	9.49923	346.458	959.997	94.2459	706.235	P	P	P	P	0	TCONS_l2_00024571							BROAD Institute lincRNA (XLOC_l2_012847), lincRNA [TCONS_l2_00024571]	chr6:2852797-2852738	hs|6p25.2	TGTGAACATGTGTCATACAGAAGGTCAGCACTGCACTGTGTGAACACGCTTCATACAGAA
A_21_P0013145				-5.32	8.76129	-2.716	8.35915	10.0496	7.63815	9.11091	7.66943	1316.77	225.448	436.195	203.163	P	P	P	P	0	ENST00000428896		Hs.171384		ENST00000428896	THC2689444			chr6:85130914-85130855	hs|6q14.3	GTTTGCTCTGCTCTGTCCTCACCCCTCAAGAGAATTTCCCTTATTATTATGAAAACTTTT
A_21_P0013169	XLOC_l2_013267			8.32484	7.5252	5.19031	7.52204	6.15019	9.20761	6.42735	8.80317	76.7312	641.162	68.7836	440.369	P	P	P	P	0	TCONS_l2_00025628							BROAD Institute lincRNA (XLOC_l2_013267), lincRNA [TCONS_l2_00025628]	chr7:5894029-5894088	hs|7p22.1	TATTTGTTTTAGTAAAGGCTGTCACTCTATCTTGGGCGAAGATTTGGGTTCTGTGGACTG
A_21_P0013181	LOC100506098	100506098	XR_108746	-10.6718	8.21006	-11.7309	8.71025	10.0937	6.67794	10.6656	7.11337	1364.23	118.774	1290.62	137.496	P	P	P	P	0	ENST00000439058	XR_108746	Hs.59203	uncharacterized LOC100506098	ENST00000439058	THC2641473		PREDICTED: Homo sapiens uncharacterized LOC100506098 (LOC100506098), transcript variant X3, ncRNA [XR_108746]	chr7:20261174-20261233	hs|7p21.1	ATCTTTAGCTGCCTTTGTATCAACTTCTTTGGAGCTTATGTGATTTTCCAGAAAATTTCC
A_21_P0013191	XLOC_l2_013330			-1.14235	5.79048	-4.25062	7.35834	5.88728	5.69528	8.47585	6.38818	64.1175	61.4699	279.774	83.0523	P	P	P	P	0	TCONS_l2_00025774		Hs.652669			THC2586597		BROAD Institute lincRNA (XLOC_l2_013330), lincRNA [TCONS_l2_00025774]	chr7:29730587-29734185	hs|7p14.3	TAAAAATAGCAGATATATCTGGCCTACCATCCTTCTGCTGCTGAACCAATGCCAACAGTG
A_21_P0013202				-5.38762	7.02364	-3.96377	7.18492	8.34275	5.9131	8.24671	6.25984	372.996	71.1463	239.524	75.807	P	P	P	P	0	ENST00000453012		Hs.743056		ENST00000453012			HY188447 RIKEN full-length enriched human cDNA library, testis Homo sapiens cDNA clone H04D016N10, mRNA sequence [HY188447]	chr7:62672075-62672134	hs|7q11.21	AAATGGAATCAAACAACTGTCGAGAAGTCTGTCCCCATGAGCATGTACCTGGTGTGCTTT
A_21_P0013239				-4.08265	8.67103	-1.05418	8.53917	9.74495	7.71545	8.57731	8.50119	1055.53	238.421	302.099	360.011	P	P	P	P	0	ENST00000403118				ENST00000403118				chr7:75465240-75465299	hs|7q11.23	ATTGATACATAACAGACACCTGCACAGAGCGTAAACAGAGGTGGCATGACTAGAAACCGT
A_21_P0013453	LINC-PINT	378805	NR_034120	-1.94263	7.70353	6.74371	6.9493	8.19741	7.23941	5.7076	8.46114	333.433	172.711	41.4324	350.698	P	P	P	P	0	NR_034120	NR_034120	Hs.150556	long intergenic non-protein coding RNA, p53 induced transcript	ENST00000447307	THC2499144		Homo sapiens long intergenic non-protein coding RNA, p53 induced transcript (LINC-PINT), transcript variant 9, long non-coding RNA [NR_034120]	chr7:130566653-130566594	hs|7q32.3	TTTTGAAGCTACATCTTAAAGAAGTGTCCTGCTCAGATGCAGTTCTCCTTGTGAAATCCG
A_21_P0013456	XLOC_l2_014048			1.86407	7.43105	4.57077	7.33858	6.99538	7.89384	6.32379	8.51623	141.284	267.931	64.3187	363.693	P	P	P	P	0	TCONS_l2_00027518							BROAD Institute lincRNA (XLOC_l2_014048), lincRNA [TCONS_l2_00027518]	chr7:149317044-149316941	hs|7q36.1	TTCCAGATGTTCCTGTGGACCCCAGTCCAGGAAACAGAGATGGAAAGGCCAGGAAGAGAC
A_21_P0013475				-6.993	9.50923	-2.09546	8.86465	11.0151	8.20921	9.41433	8.34707	2666.47	329.77	538.774	323.943	P	P	P	P	0	ENST00000511103				ENST00000511103			asparagine synthetase pseudogene 4 [Source:HGNC Symbol;Acc:HGNC:39400] [ENST00000511103]	chr8:47610171-47610230	hs|8q11.1	ATTAATATCATCAAATCTTTGAATGCCATTACCCAGGCCAGGCTGACTGGCTGAGCCATT
A_21_P0013512				-6.41026	11.3565	-1.85916	10.6038	12.7754	10.0951	11.0605	10.1659	9517.48	1143.72	1678.41	1107.04	P	P	P	P	0	ENST00000518311				ENST00000518311	THC2568453		asparagine synthetase pseudogene 1 [Source:HGNC Symbol;Acc:HGNC:754] [ENST00000518311]	chr8:47491719-47491130	hs|8q11.1	ATATGTTGAACATCAGGTTGATGATGCAATGATGGCAAATGCAGCCCAGAAATTTCCCTT
A_21_P0013514	XLOC_l2_014504			-5.18663	8.50672	-1.31639	7.88433	9.77659	7.4018	8.08511	7.68853	1079.18	192.967	214.289	206.318	P	P	P	M	0	TCONS_l2_00028188							BROAD Institute lincRNA (XLOC_l2_014504), lincRNA [TCONS_l2_00028188]	chr8:47505181-47505122	hs|8q11.1	CATGAAGTTCTCTTTAACTCTGAGGAAGGCTTTCAGGCTCTGGATGAAGTCATATTTTCC
A_21_P0013517	XLOC_l2_014549			-3.56352	8.49129	-4.76704	7.81556	9.45727	7.62397	9.02288	6.76978	851.967	223.876	408.301	107.89	P	P	P	P	0	TCONS_l2_00028240							BROAD Institute lincRNA (XLOC_l2_014549), lincRNA [TCONS_l2_00028240]	chr8:74189523-74189464	hs|8q21.11	CTTGTGTCCCTAAGGAGTGAGAAACCCATTTATACTCTATTCTCAGTATGGATTATTAAT
A_21_P0013574	MTHFD1L	25902	NM_001242767	-19.1846	7.74275	-11.1254	7.49364	10.1616	5.89969	9.43042	5.95463	1429.02	70.512	545.009	61.078	P	P	P	P	0	NM_001242767	NM_001242767	Hs.591343	methylenetetrahydrofolate dehydrogenase (NADP+ dependent) 1-like	ENST00000444603	THC2536838	GO:0004329(formate-tetrahydrofolate ligase activity)|GO:0004477(methenyltetrahydrofolate cyclohydrolase activity)|GO:0004488(methylenetetrahydrofolate dehydrogenase (NADP+) activity)|GO:0005524(ATP binding)|GO:0005739(mitochondrion)|GO:0005829(cytosol)|GO:0006730(one-carbon metabolic process)|GO:0006760(folic acid-containing compound metabolic process)|GO:0009396(folic acid-containing compound bi…	Homo sapiens methylenetetrahydrofolate dehydrogenase (NADP+ dependent) 1-like (MTHFD1L), transcript variant 1, mRNA [NM_001242767]	chr6:151358151-151358210	hs|6q25.1	TCACCAACCTGACAAAAAAGGTGTGCCAAGTGACTTCATCTTACCTATCAGTGATGTCCG
A_21_P0013651	XLOC_l2_015213			1.0897	6.33367	-4.13626	5.67404	6.27201	6.39594	6.78989	4.74156	84.2905	96.8658	88.1634	26.6506	P	P	P	P	0	TCONS_l2_00029347							BROAD Institute lincRNA (XLOC_l2_015213), lincRNA [TCONS_l2_00029347]	chr9:68424086-68424027	hs|9q13	TATGTTCTTTTCTGTCCTGGGTGGGTGAGCTCTATCTCAATGTTGGTAACTGAACACTGC
A_21_P0013759				1.64499	7.44674	4.99362	7.57672	7.09635	7.81443	6.50496	8.82505	152.27	254.441	72.4468	448.22	P	P	P	P	0	ENST00000444706				ENST00000444706	THC2487640		makorin ring finger protein 4, pseudogene [Source:HGNC Symbol;Acc:HGNC:7115] [ENST00000444706]	chrX:40694958-40695017	hs|Xp11.4	TTTTGATGAAGGACGTGGGAGCTGCCCATTTGGAGAGAACTGTTTTTACAAGCATATGTA
A_21_P0013769	ETF1	2107	NM_001256302	-4.48053	9.10852	1.52949	9.71402	10.2544	8.09071	9.41232	10.0254	1533.85	306.059	538.233	1000.18	P	P	P	P	0	NM_001256302	NM_001256302	Hs.483494	eukaryotic translation termination factor 1	ENST00000430422	THC2469430	GO:0000184(nuclear-transcribed mRNA catabolic process, nonsense-mediated decay)|GO:0003723(RNA binding)|GO:0003747(translation release factor activity)|GO:0005515(protein binding)|GO:0005737(cytoplasm)|GO:0005829(cytosol)|GO:0006412(translation)|GO:0006415(translational termination)|GO:0006449(regulation of translational termination)|GO:0006479(protein methylation)|GO:0008079(translation terminat…	Homo sapiens eukaryotic translation termination factor 1 (ETF1), transcript variant 2, mRNA [NM_001256302]	chr5:137844433-137844374	hs|5q31.2	GGAGCTATGTTGGAAATTGTCACAGATAAATCACAAGAAATGTCTCAGTTTGTGAAAGGA
A_21_P0013781	XLOC_l2_015578			-1.63086	7.60478	-5.82056	8.06772	7.96578	7.26014	9.43774	6.89658	281.329	175.243	547.725	118.026	P	P	P	P	0	TCONS_l2_00030292							BROAD Institute lincRNA (XLOC_l2_015578), lincRNA [TCONS_l2_00030292]	chrX:100779091-100779150	hs|Xq22.1	TGAGATAGTTCTAGGAAGGGGTGGCAGCTCCTGGTCCTCTTGGATTGCCCATTTTGGAGT
A_21_P0013801	XLOC_l2_015641			4.3035	5.35435	2.10496	5.20167	4.40411	6.50962	4.69241	5.7662	21.9696	104.991	20.9062	53.6555	P	P	P	P	0	TCONS_l2_00030396					THC2552745		BROAD Institute lincRNA (XLOC_l2_015641), lincRNA [TCONS_l2_00030396]	chrX:149185039-149185098	hs|Xq28	ATGAATTGCAAAGGGCCTGTTTGGAATGGACTGTATTAAATCTACTTCAAATGAAAACCT
A_21_P0013922	lnc-PPIE-1		XM_005271373	1.0842	6.36182	-6.77851	5.44461	6.30377	6.4204	6.99738	4.23641	86.379	98.4872	101.148	19.6795	P	P	P	P	0	lnc-PPIE-1:1	XM_005271373	Hs.552820	lnc-PPIE-1:1		THC2662069		PREDICTED: Homo sapiens atherin-like (LOC101929536), mRNA [XM_005271373]	chr1:40255766-40255825	hs|1p34.2	CTCGAAGCAAGTGTATAATGCCCCCAAAAATCACATTTAGAAGTCATCACTTCAATAAAA
A_21_P0013993	FAM104B	90736	NM_138362	-1.48193	7.54064	-6.10458	7.53516	7.82972	7.26224	8.95227	6.34238	255.693	175.5	388.37	80.1901	P	P	P	P	0	NM_138362	NM_138362	Hs.415414	family with sequence similarity 104, member B	ENST00000478918	THC2685673		Homo sapiens family with sequence similarity 104, member B (FAM104B), transcript variant 1, mRNA [NM_138362]	chrX:55169521-55169507	hs|Xp11.21	CAAAAGGAATAAGAGAAACCCTATCTTTCAGGATTCTCAAGACACAGTTTTCATGGAGTG
A_21_P0014003	DST	667		-6.92838	8.16368	-21.631	8.29755	9.67848	6.88596	10.8063	6.37124	1002.96	137.185	1414.68	82.03	P	P	P	P	0	ENST00000521821			dystonin	ENST00000521821		GO:0000226(microtubule cytoskeleton organization)|GO:0003779(actin binding)|GO:0005178(integrin binding)|GO:0005509(calcium ion binding)|GO:0005515(protein binding)|GO:0005604(basement membrane)|GO:0005634(nucleus)|GO:0005635(nuclear envelope)|GO:0005737(cytoplasm)|GO:0005789(endoplasmic reticulum membrane)|GO:0005829(cytosol)|GO:0005882(intermediate filament)|GO:0005925(focal adhesion)|GO:000593…	dystonin [Source:HGNC Symbol;Acc:HGNC:1090] [ENST00000521821]	chr6:56535493-56535434	hs|6p12.1	TCACTACCTGCTGGAGAGATGGAAAATTATTTAATGCCATCATTCATAAATACAGGTATG
A_21_P0014011	lnc-CCDC64B-1		XM_005255732	4.3757	5.93612	1.05736	5.81026	4.9661	7.09562	5.77016	5.85063	33.45	156.717	43.4731	56.718	P	P	P	P	0	lnc-CCDC64B-1:8	XM_005255732	Hs.715074	lnc-CCDC64B-1:8		THC2474520		Homo sapiens cDNA FLJ42988 fis, clone BRTHA2008955. [AK124978]	chr16:3103850-3103791	hs|16p13.3	AAGGTCACTTTGTCCCTGGATGACCAAACACAGGCCAATGTAACTTACTGGGCTTGTTTT
A_21_P0014061	LINC00083	400797	XR_241155	4.82192	8.74367	7.00844	9.04961	7.6822	9.95181	7.75341	10.5625	230.706	1042.87	169.941	1444.2	P	P	P	P	0	XR_241155	XR_241155	Hs.591460	long intergenic non-protein coding RNA 83		THC2486670	GO:0030246(carbohydrate binding)	PREDICTED: Homo sapiens long intergenic non-protein coding RNA 83 (LINC00083), misc_RNA [XR_241155]	chr1:178463608-178463549	hs|1q25.2	GCCCTTCCTCTGCTACTGTGGTGTGTTCACATTCATATTTCAGGCTTGGTCTTTCCCCCA
A_21_P0014089	LOC101927027	101927027	NR_110205	-5.34518	8.77371	-2.54482	8.53481	10.0658	7.64752	9.23515	7.88758	1334.55	226.755	474.971	236.518	P	P	P	P	0	NR_110205	NR_110205		uncharacterized LOC101927027		THC2549847		Homo sapiens uncharacterized LOC101927027 (LOC101927027), transcript variant 2, long non-coding RNA [NR_110205]	chr2:179298745-179298804	hs|2q31.2	TGACATGGGTCGTTCATCTCTGTATTCTAAACCCTCAATGAACTGTAGACAGTAATAAAT
A_21_P0014120	LOC100507291	100507291	NR_121608	-2.87081	8.33072	-5.46268	8.89862	9.12611	7.60465	10.2073	7.75772	669.778	220.991	943.722	215.926	P	P	P	P	0	NR_121608	NR_121608	Hs.97661	uncharacterized LOC100507291		THC2534387		Homo sapiens uncharacterized LOC100507291 (LOC100507291), transcript variant 1, long non-coding RNA [NR_121608]	chr3:139163387-139163446	hs|3q23	CAATGCCTGGTGACTGGGGCTGGTTCATACTAGACGATCAATAAATGCTCCTTGAATGAA
A_21_P0014134	EVC	2121	XR_427477	-5.74857	8.31458	-32.7679	9.06863	9.67135	7.14815	11.9286	6.89437	997.915	162.205	3088.52	117.892	P	P	P	P	0	XR_427477	XR_427477	Hs.666267	Ellis van Creveld syndrome		THC2535975	GO:0001501(skeletal system development)|GO:0003416(endochondral bone growth)|GO:0005737(cytoplasm)|GO:0005929(cilium)|GO:0007224(smoothened signaling pathway)|GO:0007517(muscle organ development)|GO:0016021(integral to membrane)|GO:0036064(cilium basal body)|GO:0045880(positive regulation of smoothened signaling pathway)|GO:0051216(cartilage development)|GO:0060170(cilium membrane)	PREDICTED: Homo sapiens Ellis van Creveld syndrome (EVC), transcript variant X11, misc_RNA [XR_427477]	chr4:5830668-5830727	hs|4p16.2	GGTTATGCAATGTGGCTGCTTTGACTGTACTGGACATAAAAATAAGTAAAATGTTCTTCA
A_21_P0014172	HIST1H4H	8365		-5.22863	9.60751	-3.15642	9.00461	10.8745	8.48811	9.87185	8.21356	2408.4	396.418	750.988	295.821	P	P	P	P	0	BC010926	BC010926		histone cluster 1, H4h		THC2472984	GO:0000183(chromatin silencing at rDNA)|GO:0000228(nuclear chromosome)|GO:0000278(mitotic cell cycle)|GO:0000723(telomere maintenance)|GO:0000786(nucleosome)|GO:0003677(DNA binding)|GO:0005515(protein binding)|GO:0005576(extracellular region)|GO:0005634(nucleus)|GO:0005654(nucleoplasm)|GO:0006325(chromatin organization)|GO:0006334(nucleosome assembly)|GO:0006335(DNA replication-dependent nucleoso…	Homo sapiens histone cluster 1, H4h, mRNA (cDNA clone IMAGE:4273904). [BC010926]	chr6:26281345-26281286	hs|6p22.2	TTGCCTAGTTCTGTCCCACAGATTTCCAATAAAAGGTGAATAAAATCAGGTCACTCTTCT
A_21_P0014189				6.42717	6.53908	7.58069	5.76592	5.33329	8.01747	4.48701	7.40934	43.3048	291.565	18.6794	169.683	P	P	P	P	0	THC2644037					THC2644037			chr7:050366178-050366237	hs|7p12.2	GTAGGAGTGATTCCCCAATGCTAGAACCTTTGGTCAAATATAATTCTAATCCAGTCAAAA
A_21_P0014195				8.49564	9.17129	7.88311	9.06227	7.75688	10.8436	7.69446	10.6732	242.509	1907.79	163.047	1550.72	P	P	P	P	0	XR_108794	XR_108794	Hs.729218			THC2532322		PREDICTED: Homo sapiens uncharacterized LOC100506312 (LOC100506312), misc_RNA [XR_108794]	chr7:106815430-106815489	hs|7q22.3	AATAAATAAGGAATCTGCACTGAGAACCATTGCAAAGGAAGCTGGAGACGGGTGGCTTTC
A_21_P0014234	lnc-CTSL1-1			1.17843	8.1526	-5.76649	8.02809	8.03502	8.27189	9.39081	6.86311	295.628	344.618	530.889	115.221	P	P	P	P	0	lnc-CTSL1-1:1	XR_171053	Hs.744071	lnc-CTSL1-1:1		THC2645797		PREDICTED: Homo sapiens DAPK1 intronic transcript 1 (non-protein coding) (DAPK1-IT1), misc_RNA [XR_171053]	chr9:90169282-90169341	hs|9q21.33	GAGGCATGTTTTTAGCTGAATAGCAATAATTATGGGATTGTGCAATACTGGAAGAAGCAG
A_21_P0014247				1.64787	7.04085	5.6695	6.95793	6.68977	7.41037	5.81799	8.32121	112.721	194.014	45.111	318.519	P	P	P	P	0	AK096685	AK096685	Hs.658287			THC2492321		Homo sapiens cDNA FLJ39366 fis, clone PEBLM2006283. [AK096685]	chr10:14566848-14566789	hs|10p13	CAGCAGCTTTTGCATAATCCAGGAGAATTGAATAATAGTTGAAGTTAATTTTGCCAGTGA
A_21_P0014248	VIM-AS1	100507347	NR_108061	6.85259	9.75608	3.90464	10.158	8.46605	11.2427	9.22285	11.188	408.621	2485.13	470.957	2226.97	P	P	P	P	0	NR_108061	NR_108061	Hs.740502	VIM antisense RNA 1		THC2499596		Homo sapiens VIM antisense RNA 1 (VIM-AS1), transcript variant 1, long non-coding RNA [NR_108061]	chr10:17256478-17256419	hs|10p13	GAGTTGCTTATTTCAGTCTCTCTTTGATATATCTGCCTTTTTAGTGCTGACTCTATCATG
A_21_P0014250	LOC100289455	100289455		5.69501	6.31367	3.57179	6.19113	5.18232	7.69201	5.34054	7.17719	39.2016	233.775	32.2754	144.135	P	P	P	P	0	AK295718	AK295718	Hs.729523	uncharacterized LOC100289455				Homo sapiens cDNA FLJ53529 complete cds. [AK295718]	chr10:22727329-22727388	hs|10p12.2	CCACTTGATTTTTATCTCCTTTTGGAGAGCAGGGAATTTTTTGTTCCCTGGAGCCTAGCA
A_21_P0014261	LOC102723539	102723539	XR_424215	-1.07313	7.40439	-5.88652	7.14783	7.45547	7.35365	8.54002	5.9826	196.446	187.186	293.479	62.295	P	P	P	P	0	XR_424215	XR_424215		uncharacterized LOC102723539		THC2643198		PREDICTED: Homo sapiens uncharacterized LOC102723539 (LOC102723539), ncRNA [XR_424215]	chr11:34181451-34181510	hs|11p13	ACCTGTTAGAAGCTGTCACCAGCAGGACTTTATGTGCATAAAACAGCTTTCCTTCCACCA
A_21_P0014312	SNHG19	100507303	XR_111621	-2.09585	11.7944	-5.56017	12.2828	12.3402	11.2727	13.5826	11.1075	6968.5	2528.66	9978.06	2106.18	P	P	P	P	0	ENST00000563192	XR_111621	Hs.369728	small nucleolar RNA host gene 19 (non-protein coding)	ENST00000563192	THC2698032		small nucleolar RNA host gene 19 (non-protein coding) [Source:HGNC Symbol;Acc:HGNC:49574] [ENST00000563192]	chr16:2204862-2204803	hs|16p13.3	CGGTAAGGTGGGCGCTGTGTCTATTGAAGTGCTTAGCAATAAAGAAAGGTAGTGAGTTGA
A_21_P0014358	LOC100507520	100507520	XR_109439	5.66015	6.9517	1.12997	8.33684	5.81285	8.31369	8.24916	8.42544	60.7629	354.52	239.862	342.132	P	P	P	P	0	ENST00000571724	XR_109439	Hs.212051	uncharacterized LOC100507520	ENST00000571724			PREDICTED: Homo sapiens uncharacterized LOC100507520 (LOC100507520), transcript variant 1, ncRNA [XR_109439]	chr17:79361987-79361928	hs|17q25.3	CGGCCACCGCCTCTTTTGTTAACAGGACAGTTGATCCATTAAATTAAAAATCATTCAATA
A_21_P0014379	ZNF793-AS1	101927720	NR_110723	-4.20041	7.62901	-4.94612	6.96623	8.7342	6.66367	8.21417	5.90788	502.227	117.47	234.793	58.914	P	P	P	P	0	NR_110723	NR_110723		ZNF793 antisense RNA 1 (head to head)		THC2661496		Homo sapiens ZNF793 antisense RNA 1 (head to head) (ZNF793-AS1), long non-coding RNA [NR_110723]	chr19:37988244-37988185	hs|19q13.12	ACTAGATGCCATTCTCAGATTCCACGCATATGGCCAAGGGTCCAGGAAATAAGAAGAAAC
A_21_P0014427	lnc-CHADL-1			-5.2875	6.46148	-1.04631	6.13054	7.77349	5.3709	6.16328	6.09797	245.389	49.104	56.8782	68.0154	P	P	P	P	0	lnc-CHADL-1:1	AK057177	Hs.627409	lnc-CHADL-1:1		THC2507384		Homo sapiens cDNA FLJ32615 fis, clone STOMA2000148. [AK057177]	chr22:41605490-41605431	hs|22q13.2	GGAATTCACCAGGCTCCTCTGTGGATTTACAAATGATGATATTTTAACATGGTTCAAATA
A_21_P0014437				-6.97551	7.66891	1.08323	8.34466	9.19701	6.39471	8.28718	8.40253	705.917	96.8153	245.332	337.621	P	P	P	P	0	BC033052	BC033052	Hs.676556			THC2612243		Homo sapiens cDNA clone IMAGE:5259731. [BC033052]	chr4:160061872-160061931	hs|4q32.1	GCCTGGGAGGACAGAATTTAACATTGATAACACCAATTTAATGTTTCATGAAAGATCGTA
A_21_P0014476				2.9948	8.66434	6.39137	9.00107	7.90916	9.49163	7.76192	10.438	270.839	772.985	170.975	1323.42	P	P	P	P	0	BX647890	BX647890	Hs.662634			THC2532158		Homo sapiens mRNA; cDNA DKFZp686N05102 (from clone DKFZp686N05102). [BX647890]	chr3:48975039-48975098	hs|3p21.31	TGCTTTTTAATATGTCTAAGCCCAGGCCAATAAATGCACAGTTGAAAATTTGACTCCAAA
A_21_P0014544	LOC100507437	100507437	NR_125384	-4.38081	5.62066	-5.15558	6.09891	6.78638	4.65518	7.39566	5.02953	120.785	29.304	132.073	32.4378	P	P	P	P	0	NR_125384	NR_125384	Hs.676548	uncharacterized LOC100507437		THC2577112		Homo sapiens uncharacterized LOC100507437 (LOC100507437), transcript variant 1, long non-coding RNA [NR_125384]	chr14:105884118-105884059	hs|14q32.33	TGGATTGCCCTTAAGCCAGCTCAGAGGCAAAGTCCAAAGACCTCAGGTGAGTCAAACAAT
A_21_P0014618	LOC101928521	101928521	XR_246615	9.39122	7.30987	6.18629	7.11428	5.87064	9.10195	5.92017	8.54924	63.4309	594.347	48.2329	371.616	P	P	P	P	0	XR_246615	XR_246615	Hs.59872	uncharacterized LOC101928521		THC2653290		PREDICTED: Homo sapiens uncharacterized LOC101928521 (RP11-1191J2.2), ncRNA [XR_246615]	chr4:647379-647320	hs|4p16.3	AAAGTGGAATCTGTCGCTTTGAGCTTGACAGGCAAACATCCGACCAGCCCTTCCTCCGCC
A_21_P0014637	LOC101927765	101927765	NR_125962	4.02611	6.62754	3.07181	6.94343	5.69856	7.70795	6.18092	7.8	55.9569	236.895	57.6881	223.075	P	P	P	P	0	NR_125962	NR_125962	Hs.596703	uncharacterized LOC101927765		THC2534702		Homo sapiens uncharacterized LOC101927765 (LOC101927765), transcript variant 2, long non-coding RNA [NR_125962]	chr1:234508681-234508622	hs|1q42.2	CAGCAAGGTATTTTTAAAAGGGATGAAGAGAGTTGCTTCAAATGTTTTGAGACGTTGTTA
A_21_P0014651	LOC100129203	100129203	NR_110295	5.6687	6.85766	2.14803	7.39844	5.71942	8.22244	6.86747	7.97048	56.8875	333.116	92.7837	250.739	P	P	P	P	0	NR_110295	NR_110295	Hs.191599	uncharacterized LOC100129203		THC2641240		Homo sapiens uncharacterized LOC100129203 (LOC100129203), long non-coding RNA [NR_110295]	chr11:94967207-94967266	hs|11q21	CTCCACCCCTTTTGTTGTCTGGTATGTTTAAAACAAGAAAGAACTTTAGAAAAGTAGGAT
A_21_P0014657				-5.7712	5.98827	-2.17118	4.90157	7.38474	4.85587	5.49261	4.37413	186.889	34.1004	35.8584	21.4804	P	P	P	P	0	THC2657673					THC2657673			chrX:007986269-007986328	hs|Xp22.31	CCACATCTTCTCCCTGCATGTCCTTGGGTTGGAAGGAACAGCTTATTTTTTGTCCTACAT
A_21_P0014736	LOC100506538	100506538	XR_426345	-3.8789	6.37592	-6.05961	7.43896	7.42829	5.47264	8.85124	6.25202	192.804	52.7011	361.932	75.5439	P	P	P	P	0	XR_426345	XR_426345	Hs.435500	uncharacterized LOC100506538		THC2533138		PREDICTED: Homo sapiens uncharacterized LOC100506538 (LOC100506538), ncRNA [XR_426345]	chr8:96000846-96000905	hs|8q22.1	CAAAAATGTCTTAGGCAAATGTGTGGGAATGAACATGCACTTTAAAATTATGGGACCTAG
A_21_P0014771				-3.95001	9.30987	12.963	9.66603	10.3534	8.37153	7.99297	11.6893	1645.1	368.083	200.857	3147	P	P	P	P	0									chr7:105891330-105891389	hs|7q22.3	GCACTCATCTTTTACATGGTTAAATGCATTTCCTAATTTGAGATCACCTAAACACTGGAA
A_21_P0014847	CYB561D2	11068	NR_111913	9.48608	8.45993	3.23724	8.70597	6.99128	10.2371	7.89973	9.59449	140.686	1258.6	188.743	749.765	P	P	P	P	0	NR_111913	NR_111913		cytochrome b561 family, member D2		THC2562926	GO:0016021(integral to membrane)|GO:0046872(metal ion binding)|GO:0055114(oxidation-reduction process)	Homo sapiens cytochrome b561 family, member D2 (CYB561D2), transcript variant 4, non-coding RNA [NR_111913]	chr3:50405569-50405628	hs|3p21.31	ACTGCTTGGAGTCTGGAGTCACTTTCTCCATGAGCTCAATAAAGTTTTTCAGGAACTCGG
A_21_P0014871				-5.64293	11.4745	-2.761	10.956	12.7904	10.294	11.7131	10.2479	9587.65	1307.61	2650.48	1167.65	P	P	P	P	0	ENST00000552481				ENST00000552481				chr12:77377946-77377887	hs|12q21.2	AAACGATCATGCCAAAAAAGTGGCAAAAAAGCTAGAAGCTCTCTCGGTGAAGGAGGAGAC
A_21_P0014898				54.6446	9.47507	168.042	9.18064	7.01884	12.7909	6.20048	13.5932	143.705	6963.91	58.4949	11536.5	P	P	P	P	0	THC2577566					THC2577566			chr8:029940900-029940959	hs|8p12	TTTGAGAGGCTGAAAACGTCACGACGCGAAATCTAAGAAATGTAGTCAAATTATGTATTA
A_21_P0014944	LOC102724156	102724156	XR_426407	4.95592	6.32353	11.4418	6.46138	5.2735	7.58265	4.93818	8.45442	41.7188	217.778	24.4184	349.105	P	P	P	P	0	XR_426407	XR_426407		uncharacterized LOC102724156		THC2550705		PREDICTED: Homo sapiens uncharacterized LOC102724156 (LOC102724156), transcript variant X1, ncRNA [XR_426407]	chr9:90681467-90681408	hs|9q22.1	CAACTCAACCTCCTCTTTCTGCCTCTACCCAAATTTTAAAACTTTTAAACATGGGTTTAA
A_22_P00000004	lnc-WISP1-1			39.0373	7.68181	83.6276	7.28738	5.4805	10.7673	4.76323	11.1491	47.967	1812.21	21.9762	2167.06	P	P	P	P	0	lnc-WISP1-1:1	AK023948	Hs.658759	lnc-WISP1-1:1		THC2605024		Homo sapiens cDNA FLJ13886 fis, clone THYRO1001559. [AK023948]	chr8:134069893-134069952	hs|8q24.22	TTCTGCCTCTGAAACTTGCTCTATTTCCCTCAAGTCCTGCTTCCTTTTGTAGGTTTAAGA
A_22_P00000040	HOTAIRM1	100506311	NR_038366	8.96595	9.94473	2.95631	11.8999	8.48759	11.652	11.1437	12.7075	415.192	3232.84	1778.4	6265.93	P	P	P	P	0	NR_038366	NR_038366	Hs.445239	HOXA transcript antisense RNA, myeloid-specific 1		THC2548787		Homo sapiens HOXA transcript antisense RNA, myeloid-specific 1 (HOTAIRM1), transcript variant 1, long non-coding RNA [NR_038366]	chr7:27139525-27139584	hs|7p15.2	TTGATAACTTAGTTATTGACCTGGAGACTGGTAGCTTATTAAAGAAACTCCGTGTTACTC
A_22_P00000108				11.4596	10.859	11.9841	9.90759	9.24134	12.7598	8.27674	11.8598	728.337	6825.31	243.705	3531.58	P	P	P	P	0	ENST00000613353	M18205	Hs.74647		ENST00000613353	NP092367		T cell receptor alpha constant [Source:HGNC Symbol;Acc:HGNC:12029] [ENST00000613353]	chr14:23016508-23016567	hs|14q11.2	TGTCTGCCTATTCACCGATTTTGATTCTCAAACAAATGTGTCACAAAGTAAGGATTCTGA
A_22_P00000215	PIK3IP1-AS1	101929760	NR_110542	11.0131	8.12096	1.68152	8.4222	6.57273	10.0339	8.05566	8.80543	104.323	1101.33	210.121	440.999	P	P	P	P	0	NR_110542	NR_110542		PIK3IP1 antisense RNA 1 (head to head)		THC2689770		Homo sapiens PIK3IP1 antisense RNA 1 (head to head) (PIK3IP1-AS1), long non-coding RNA [NR_110542]	chr22:31733941-31734000	hs|22q12.2	GTTAGCACAGCCTACCTAGCTCTTCTGTCATTGTCTTTTTAAGTAAACATTATACATTTG
A_22_P00000241				-38.906	8.50995	-10.0125	9.48121	11.5513	6.26936	11.2876	7.96389	3971.14	89.5238	1971.46	249.487	P	P	P	P	0	ENST00000579378				ENST00000579378				chr17:28877629-28877570	hs|17q11.2	AGTTCCCAGTGAAAACTGGAGGTTGCCATCACCTAACCACACATGCAATAAAGTCTTCTG
A_22_P00000504	lnc-AC105020.1-1			-1.37002	6.05823	-4.98245	6.49075	6.28958	5.83538	7.75175	5.43489	85.2118	67.2828	169.461	42.7376	P	P	P	P	0	lnc-AC105020.1-1:1			lnc-AC105020.1-1:1				LNCipedia lincRNA (lnc-AC105020.1-1), lincRNA [lnc-AC105020.1-1:1]	chr15:75968810-75968869	hs|15q24.2	AAGTTGGTGAAGGCAAAGACCACCTCGCCCTGGTCTATCTGGAATTGGCTGAAGGCCGAG
A_22_P00000562	lnc-AC127496.3-6			-4.56382	7.58664	-1.23001	6.47189	8.76039	6.57015	6.62294	6.32428	512.701	109.523	79.1078	79.1767	P	P	P	P	0	lnc-AC127496.3-6:1	AL603067	Hs.630188	lnc-AC127496.3-6:1				DKFZp686P2320_r1 686 (synonym: hlcc3) Homo sapiens cDNA clone DKFZp686P2320 5', mRNA sequence [AL603067]	chr17:78935329-78935270	hs|17q25.3	AAATAATGTTTTTACAGCAGAACGGCTGCTAAATATCGGCGCTCCTCACCTCACACTCAC
A_22_P00000579	lnc-AC136604.1-1			-7.182	5.9003	-6.53255	5.88471	7.49148	4.64709	7.39225	4.68461	201.654	29.1958	131.773	25.7528	P	P	P	P	0	lnc-AC136604.1-1:4		Hs.571027	lnc-AC136604.1-1:4		THC2718227		LNCipedia lincRNA (lnc-AC136604.1-1), lincRNA [lnc-AC136604.1-1:4]	chr5:179091372-179091431	hs|5q35.3	CCTTTCCCTTCTCAGGACATACACAGGACTGGGAGAAAATAGACTAAGTATTTGATATTA
A_22_P00000794	lnc-ADSS-2			-2.4544	5.10423	-4.80525	5.81439	5.79284	4.49747	7.05593	4.79131	59.9149	25.6723	105.428	27.5475	P	P	P	P	0	lnc-ADSS-2:1			lnc-ADSS-2:1		THC2730649		LNCipedia lincRNA (lnc-ADSS-2), lincRNA [lnc-ADSS-2:1]	chr1:244393229-244393170	hs|1q44	ATTTTAAAAGACTCCACCCAGCCTCATCTCTTTCAAGGAGTTTGTTCCCCACTAACTGGG
A_22_P00000867	AGRN	375790	NM_198576	-9.10844	11.0238	-3.80975	10.3273	12.732	9.54479	11.3372	9.40746	9217.31	795.189	2044.9	657.084	P	P	P	P	0	NM_198576	NM_198576	Hs.273330	agrin	ENST00000461111	NP1152870	GO:0001523(retinoid metabolic process)|GO:0002162(dystroglycan binding)|GO:0005200(structural constituent of cytoskeleton)|GO:0005509(calcium ion binding)|GO:0005515(protein binding)|GO:0005576(extracellular region)|GO:0005605(basal lamina)|GO:0005615(extracellular space)|GO:0005737(cytoplasm)|GO:0005796(Golgi lumen)|GO:0005886(plasma membrane)|GO:0005975(carbohydrate metabolic process)|GO:000602…	Homo sapiens agrin (AGRN), mRNA [NM_198576]	chr1:991432-991491	hs|1p36.33	CGTGTTACTAACTCTAGTATGTTTCTGTGTCAATCGCTGTGAAATAAAGTCTGAAAACTT
A_22_P00000933			XM_005252244	2.23887	6.2812	4.17099	6.40175	5.72666	6.88943	5.45392	7.51431	57.214	137.493	34.9142	182.161	P	P	P	P	0	ENST00000448674	XM_005252244			ENST00000448674	THC2577864		Q7Z591_HUMAN (Q7Z591) AT-hook transcription factor, partial (10%) [THC2577864]	chr9:117159105-117159046	hs|9q32	AGGTGGGAATGATCTGGAGACCAGGAGTAAGAAGACCTGAGTTTAGATCCCCAGCCTGGA
A_22_P00000976	LOC101929946	101929946	XR_424109	-12.4291	6.90593	-18.9899	7.13537	8.959	5.32334	9.56825	5.32109	590.872	47.3625	603.197	39.4785	P	P	P	P	0	XR_424109	XR_424109		uncharacterized LOC101929946		THC2637822		PREDICTED: Homo sapiens uncharacterized LOC101929946 (LOC101929946), transcript variant X1, ncRNA [XR_424109]	chr10:31596982-31596923	hs|10p11.22	CAAAACAGTTATCCCTATTCCTACCCCCAACTGAGTTATTCAATAAAGCCTGCCTTGTTG
A_22_P00000994				2.42633	7.76944	8.01469	7.99039	7.15632	8.43509	6.62889	9.63153	158.597	384.475	79.3281	767.091	P	P	P	P	0	ENST00000602933				ENST00000602933			cytochrome P450, family 4, subfamily F, polypeptide 26, pseudogene [Source:HGNC Symbol;Acc:HGNC:39948] [ENST00000602933]	chr9:33604342-33604401	hs|9p13.3	AGCTGGTCTGGCCCTGGACGTGCCTTCAGGTGCTGGTTATGCTTTATGACCTGTGTTGTG
A_22_P00001001	lnc-AL353698.1-1			-5.80221	7.47391	-1.27575	8.19072	8.84906	6.31245	8.36828	8.01693	546.098	91.718	259.644	259.283	P	P	P	P	0	lnc-AL353698.1-1:1			lnc-AL353698.1-1:1		THC2714876		Q14754_HUMAN (Q14754) ORFII, partial (4%) [THC2714876]	chrX:56231420-56231479	hs|Xp11.21	AATCGAGCTGCAAAATGACCTACAGATATTACAGTTTTATTCTTGGAAAATGGAGGTTGT
A_22_P00001004				4.5787	6.31321	4.68386	6.54149	5.31042	7.50536	5.52179	7.74949	42.6791	206.625	36.5846	214.993	P	P	P	P	0	ENST00000452795				ENST00000452795				chr1:16847218-16847277	hs|1p36.13	TATTCTCAGGGCCCACCGGGCAGGACCACTGAGCAAGGCCTTGGAAAACCAGAGAGATTA
A_22_P00001149	PCED1B-AS1	100233209		23.2435	10.9436	26.8179	9.91969	8.90704	13.4458	7.82692	12.572	569.847	10742.6	178.907	5674.43	P	P	P	P	0	ENST00000547851	AK092995	Hs.657722	PCED1B antisense RNA 1	ENST00000547851	THC2546754		PCED1B antisense RNA 1 [Source:HGNC Symbol;Acc:HGNC:44166] [ENST00000547851]	chr12:47600353-47600294	hs|12q13.11	AGGAGGCAGGAGGTGGAGCAAAACACACCAAGCCTGGTGCCAATCATTGACAATATTATG
A_22_P00001150	PCED1B-AS1	100233209	NR_026544	8.72433	10.8428	9.25666	10.3147	9.39224	12.5173	8.83358	12.0441	812.796	5747.5	358.237	3999.14	P	P	P	P	0	NR_026544	NR_026544	Hs.657722	PCED1B antisense RNA 1	ENST00000552975	THC2550345		Homo sapiens PCED1B antisense RNA 1 (PCED1B-AS1), long non-coding RNA [NR_026544]	chr12:47610028-47609969	hs|12q13.11	CTTGCTGGTGTGGTATGTTCACGGCTGAAAAGATGGTCAGAAGGGGAAAGGAGGAAGTGA
A_22_P00001151	PCED1B-AS1	100233209	NR_026544	5.01372	8.54983	6.10946	7.73591	7.46561	9.79149	6.53978	9.15082	198.14	939.251	74.4298	555.889	P	P	P	P	0	NR_026544	NR_026544	Hs.657722	PCED1B antisense RNA 1	ENST00000552975	THC2550345		Homo sapiens PCED1B antisense RNA 1 (PCED1B-AS1), long non-coding RNA [NR_026544]	chr12:47610226-47610167	hs|12q13.11	GGAAGCGGAAGACTAATGACCGAAGCTTCAAGACTTTGACATGTGTGAAAACATGAAATG
A_22_P00001388	LOC101927100	101927100	NR_109875	-6.3449	7.43598	-3.05717	7.61024	8.88728	6.22168	8.45891	6.84671	562.236	86.7859	275.871	113.981	P	P	P	P	0	NR_109875	NR_109875		uncharacterized LOC101927100		THC2775681		Homo sapiens uncharacterized LOC101927100 (LOC101927100), transcript variant 2, long non-coding RNA [NR_109875]	chr5:114938776-114938835	hs|5q22.3	TTACTGAACATCGGATGAGACCATGGATAGTAAATTGGGAGTGAAGGTCCATACCTGGGT
A_22_P00001600	LOC101559451	101559451	NR_103482	-3.71245	5.69804	-5.05321	5.22733	6.72225	4.82988	6.52496	4.18776	115.161	33.4554	73.669	19.1791	P	P	P	P	0	NR_103482	NR_103482		uncharacterized LOC101559451				Homo sapiens uncharacterized LOC101559451 (LOC101559451), long non-coding RNA [NR_103482]	chr17:4608757-4608816	hs|17p13.2	CCCCAGTAGCGTGTATACTTTCCTAATATTAGTCTATGCACAAGCACATAAATGAATATT
A_22_P00001695				1.00469	7.53395	-4.61916	6.95481	7.53058	7.53733	8.14568	5.93804	207.393	210.952	224.559	60.3173	P	P	P	P	0	ENST00000580085				ENST00000580085	THC2536889		ALU6_HUMAN (P39193) Alu subfamily SP sequence contamination warning entry, partial (22%) [THC2536889]	chr17:29119725-29119784	hs|17q11.2	CCATTAACAGGGTATCATGATCAGTCCCACAAATTACAAAAGATTTTAGTATATTCCTGC
A_22_P00001744	CENPN	55839	NM_001100624	-9.26039	9.1531	-5.08083	8.5453	10.8984	7.68731	9.7979	7.45284	2450.99	233.071	710.129	174.893	P	P	P	P	0	NM_001100624	NM_001100624	Hs.726537	centromere protein N			GO:0000278(mitotic cell cycle)|GO:0000777(condensed chromosome kinetochore)|GO:0005634(nucleus)|GO:0005654(nucleoplasm)|GO:0005829(cytosol)|GO:0006334(nucleosome assembly)|GO:0007059(chromosome segregation)|GO:0007067(mitosis)|GO:0034080(CenH3-containing nucleosome assembly at centromere)	Homo sapiens centromere protein N (CENPN), transcript variant 2, mRNA [NM_001100624]	chr16:81065028-81065087	hs|16q23.2	AGCTGAATCTGTCTCCCAAATTGCAATTCCTAAGACCTCAATAAAAACACCTTGTCTTGC
A_22_P00001848	PSMD6-AS2	100507062	NR_038286	5.34557	7.88745	1.92783	7.79747	6.77043	9.18877	7.33835	8.28532	119.234	632.873	126.839	311.046	P	P	P	P	0	NR_038286	NR_038286	Hs.593613	PSMD6 antisense RNA 2		THC2535207		Homo sapiens PSMD6 antisense RNA 2 (PSMD6-AS2), long non-coding RNA [NR_038286]	chr3:63997659-63997718	hs|3p14.1	ATTTCACAGACTAGAATTGAGAAATGGAACAAAACCTTGGGATACCAGCCTTCCATTTTG
A_22_P00001957	SRP54-AS1	100506157	XR_424491	-4.33025	8.49952	-2.16615	8.07429	9.62225	7.5078	8.65108	7.53595	961.423	206.886	316.552	184.811	P	P	P	P	0	XR_424491	XR_424491	Hs.172577	SRP54 antisense RNA 1 (head to head)		THC2543594		PREDICTED: Homo sapiens uncharacterized LOC100506157 (LOC100506157), transcript variant X4, ncRNA [XR_424491]	chr14:35438435-35438376	hs|14q13.2	AAGGAAAAATGAGCAGAAACTACTGTATGATGTGCAGCTCACACCAGACAGCAACTTTAG
A_22_P00002126	DGUOK-AS1	100874048	NR_104030	-11.9624	6.90825	-10.4715	7.26304	8.92666	5.34622	9.15222	5.76382	577.017	48.1257	447.917	53.5878	P	P	P	P	0	NR_104030	NR_104030		DGUOK antisense RNA 1		THC2570920		Homo sapiens DGUOK antisense RNA 1 (DGUOK-AS1), transcript variant 2, long non-coding RNA [NR_104030]	chr2:74208322-74208263	hs|2p13.1	TGTGGTTCTTCAGGAAGTTAACACGTGGAACTAACACTGTTGGATGCTGCTGAACTCTCA
A_22_P00002220				1.5508	8.34861	6.42429	8.97795	8.0381	8.67112	7.7359	10.4194	296.022	447.706	167.739	1309.44	P	P	P	P	0	ENST00000568571				ENST00000568571	THC2501608			chr2:201691998-201692057	hs|2q33.1	CTTCTTGTCTGTACCCTTGAAATGGAATAAAATTTCATGAGACTCCTTGTTAATGTAGAG
A_22_P00002241				-2.2652	5.78406	-7.06667	7.06332	6.40387	5.22423	8.61329	5.79226	92.5861	44.2302	309.29	54.5124	P	P	P	P	0	ENST00000433460		Hs.638243		ENST00000433460			DB068425 TESTI4 Homo sapiens cDNA clone TESTI4010351 5', mRNA sequence [DB068425]	chr10:21659009-21658950	hs|10p12.31	AGTGAGTAAAGGGAAAATTTTCACTTCTTCCTATGGAAGCCTGTCACCCCCCAACTCCAT
A_22_P00002363	lnc-C12orf48-1			-12.2647	5.80031	-24.4486	6.6839	7.88384	4.26741	9.3763	4.76462	265.894	21.0195	526.717	27.045	P	P	P	P	0	lnc-C12orf48-1:1			lnc-C12orf48-1:1		THC2702980		NUP37_HUMAN (Q8NFH4) Nucleoporin Nup37 (p37), partial (16%) [THC2702980]	chr12:102468218-102468277	hs|12q23.2	CAACGGCTACAGAACCCATGAGGATGGGCTATAAAATATGTGAAGAATTAAAGAAGCACA
A_22_P00002441	LOC102723354	102723354	NR_110546	1.88009	7.62618	-4.49449	8.81098	7.18437	8.09517	9.9615	7.79334	161.566	307.21	796.347	222.109	P	P	P	P	0	NR_110546	NR_110546	Hs.569410	uncharacterized LOC102723354	ENST00000548104	THC2768708		Homo sapiens uncharacterized LOC102723354 (LOC102723354), long non-coding RNA [NR_110546]	chr14:105561977-105562036	hs|14q32.33	GCCTCCAGTCAAGCCCTTGTTTCCAGCTTTCTGTGCCCTAAATAAACTTCTGCTGGGATT
A_22_P00002525	LOC339192	339192	XR_424828	5.47718	8.95034	2.62931	8.73847	7.8073	10.2607	8.06891	9.4636	251.135	1278.36	212.094	687.028	P	P	P	P	0	XR_424828	XR_424828	Hs.560498	uncharacterized LOC339192		THC2528408		PREDICTED: Homo sapiens uncharacterized LOC339192 (LOC339192), transcript variant X2, ncRNA [XR_424828]	chr17:43297811-43297752	hs|17q21.31	AAGACTTTAAGCAAGAGACGGAGAGTTAACATCTAATCTGGAGGAAGACCCTGGAAGGAG
A_22_P00002593				-4.41936	5.22829	-3.58373	5.18014	6.40896	4.26513	6.18206	4.3406	92.8588	20.9676	57.7655	21.1934	P	P	P	P	0	ENST00000562076	GQ868703	Hs.606943		ENST00000562076				chr19:51289258-51289199	hs|19q13.33	AATGTGACCCTGGCCATGGCCTTGTTCACCATCCTGACCTCCATCTATTTCTTCAACAAG
A_22_P00002654	PIK3CD-AS2	101929074	NR_126367	-62.7878	7.23262	-97.8435	7.11522	10.8111	4.83864	11.152	4.53965	2296.71	33.6362	1788.75	23.7856	P	P	P	P	0	NR_126367	NR_126367	Hs.661762	PIK3CD antisense RNA 2		THC2579628		Homo sapiens PIK3CD antisense RNA 2 (PIK3CD-AS2), transcript variant 2, long non-coding RNA [NR_126367]	chr1:9747484-9747425	hs|1p36.22	AAGATGAGAAATCAGCCACCGGAAGTCACGCCGGACCTTGGACGGGCAGACAGAGGCTGG
A_22_P00003131	lnc-C9orf139-1			7.23605	6.42499	5.79157	6.0074	5.15409	8.00929	4.87258	7.40653	38.4544	290.113	23.4615	169.325	P	P	P	P	0	lnc-C9orf139-1:1			lnc-C9orf139-1:1		THC2657488		Q3W4E4_9ACTO (Q3W4E4) Lantibiotic dehydratase, N-terminal, partial (3%) [THC2657488]	chr9:139947709-139947768	hs|9q34.3	AATAAAGGGTTAAAGGGGCCGACCAGGAGGTCCCTGGGCCTGCTGGAGTGGAGATCCAGG
A_22_P00003276	lnc-CALML5-1			-5.02197	6.53209	-3.33268	6.23995	7.79914	5.47089	7.16842	5.43174	249.816	52.6402	113.695	42.5948	P	P	P	P	0	lnc-CALML5-1:1	DC396132	Hs.707955	lnc-CALML5-1:1				DC396132 TESTI2 Homo sapiens cDNA clone TESTI2015443 5', mRNA sequence [DC396132]	chr10:5567108-5567049	hs|10p15.1	AAACAGGGAGAAGGCCTCCTTGAATTCTGTGACCTGCTCCTCAGTCAGCTGGTCGGCCAT
A_22_P00003332	lnc-CAST-2			6.7108	5.88461	5.9773	6.14999	4.66948	7.41596	4.99402	7.57352	26.7595	194.721	25.1665	189.617	P	P	P	P	0	lnc-CAST-2:1			lnc-CAST-2:1		THC2501682		AF106037 adipocyte-derived leucine aminopeptidase {Homo sapiens} (exp=-1; wgp=0; cg=0), partial (6%) [THC2501682]	chr5:96121641-96121700	hs|5q15	GATCCATTCCACCTCTTCTGGGAGGATGAGCACATCTAGAGTAAATAAAATAAATCAAAG
A_22_P00003338	C5orf66	100996485	NM_001277348	-4.1807	5.68243	-3.75241	5.28606	6.80723	4.74348	6.32535	4.41753	122.363	31.4873	64.3614	22.1104	P	P	P	P	0	NM_001277348	NM_001277348	Hs.582537	chromosome 5 open reading frame 66	ENST00000513931	THC2477426		Homo sapiens chromosome 5 open reading frame 66 (C5orf66), mRNA [NM_001277348]	chr5:134509802-134509861	hs|5q31.1	ATAGTTCAGACAAGGCCTCTGTGCTGTGATGGAACCAGGTGACCCGCAGCCTCCGGGCCA
A_22_P00003463	LINC01405	100131138		-2.48523	6.0186	-4.11359	6.51414	6.71101	5.39763	7.61375	5.57335	114.579	50.0525	153.612	46.948	P	P	P	P	0	ENST00000547607			long intergenic non-protein coding RNA 1405	ENST00000547607			long intergenic non-protein coding RNA 1405 [Source:HGNC Symbol;Acc:HGNC:50688] [ENST00000547607]	chr12:111394391-111394450	hs|12q24.11	TAGCCCAGAACCAAGCTGTTCATAAAAGGTGTGCCTGCAAATAGGAAACTAGAGAGCATG
A_22_P00003466	MMP25-AS1	100507419	XR_424759	5.10471	7.67385	-2.01232	6.86367	6.58751	8.93934	7.38661	6.37775	105.471	532.734	131.271	82.475	P	P	P	P	0	XR_424759	XR_424759		MMP25 antisense RNA 1				PREDICTED: Homo sapiens uncharacterized LOC100507419 (RP11-473M20.7), transcript variant X3, ncRNA [XR_424759]	chr16:3107199-3107140	hs|16p13.3	TGCAGGCCATCGCGGTCATCCTGAGACAGGCGGTACTTGTCAGGGTCGCCCACCGGACCC
A_22_P00003470	lnc-CCDC68-2			-6.55967	7.70504	-3.4572	8.3049	9.1804	6.46678	9.24777	7.45817	697.511	101.747	479.759	175.712	P	P	P	P	0	lnc-CCDC68-2:1	AK130693	Hs.677028	lnc-CCDC68-2:1		THC2529545		Homo sapiens cDNA FLJ27183 fis, clone SYN02322. [AK130693]	chr18:52961578-52961519	hs|18q21.2	GGAGTCCGTAGTATTTATCGGGGGATACGACCTGGATAATTCATATAAGATATGAATTTC
A_22_P00003632	lnc-CD53-1			1.37101	6.37649	6.07489	8.36544	6.15293	6.60817	7.16464	9.7675	76.9199	112.716	113.519	836.44	P	P	P	P	0	lnc-CD53-1:1	AK124172	Hs.659047	lnc-CD53-1:1				Homo sapiens cDNA FLJ42178 fis, clone THYMU2030543. [AK124172]	chr1:111495401-111495460	hs|1p13.3	AATCGTCTGAACTACTTGGTACATGCAGCCTGAAACACTTAAAAGAACATTGAGTAAATA
A_22_P00003804	KCNQ1OT1	10984	NR_002728	-9.67911	5.97031	-5.60549	6.6566	7.82822	4.55335	8.01515	5.52831	255.408	26.8266	204.008	45.4772	P	P	P	P	0	NR_002728	NR_002728	Hs.741312	KCNQ1 opposite strand/antisense transcript 1 (non-protein coding)		THC2653014		Homo sapiens KCNQ1 opposite strand/antisense transcript 1 (non-protein coding) (KCNQ1OT1), long non-coding RNA [NR_002728]	chr11:2696763-2696704	hs|11p15.5	ATTCTGGAAGAAATGTGTATGGCATGTTGTGACTGCTATGTCTCATGAAATATTTACGTT
A_22_P00003894	lnc-CEP170-5			3.20335	8.07481	4.90494	7.69666	7.27858	8.95816	6.63456	8.92879	172.398	538.558	79.6222	483.278	P	P	P	P	0	lnc-CEP170-5:1			lnc-CEP170-5:1		THC2770348		Q86TS6_HUMAN (Q86TS6) Full-length cDNA 5-PRIME end of clone CS0CAP004YO05 of Thymus of Homo sapiens (human) (Fragment), partial (21%) [THC2770348]	chr1:243956743-243956684	hs|1q44	GTTTTCTAGAGCCTGCAGCATGTGTGGGTCAGTTGAAAATGTATAAAAATTTTGAGTTAC
A_22_P00003909	lnc-CERK-1			2.15421	9.29472	7.09945	8.87847	8.75761	9.86477	7.57648	10.4042	511.413	984.263	149.92	1294.67	P	P	P	P	0	lnc-CERK-1:1	BG327427	Hs.658853	lnc-CERK-1:1		THC2614104		602426408F1 NIH_MGC_14 Homo sapiens cDNA clone IMAGE:4564465 5', mRNA sequence [BG327427]	chr22:47158036-47157977	hs|22q13.31	GCTTGAAGGGAAGAATGGTTTGAGCACCGAGGACAAGAATTAATTCCCCAGGCCTGGGTT
A_22_P00003977	lnc-CHD9-1			5.9718	7.60551	3.79313	7.87348	6.4249	9.00306	6.9703	8.89369	94.1142	552.569	99.3253	471.667	P	P	P	P	0	lnc-CHD9-1:1			lnc-CHD9-1:1		THC2709209		ALU4_HUMAN (P39191) Alu subfamily SB2 sequence contamination warning entry, partial (4%) [THC2709209]	chr16:53483017-53483076	hs|16q12.2	GGTTTTGGAGTATATAAACCATTTTTACAGCGGCTACAAATTTTAGAATGTGTGACTGCT
A_22_P00004017	LOC389641	389641	NR_033928	-26.3706	7.90711	-4.15513	8.17451	10.6123	5.89148	9.26627	7.21138	1993.86	70.1344	486.227	148.066	P	P	P	P	0	NR_033928	NR_033928	Hs.591835	uncharacterized LOC389641		THC2680087		Homo sapiens uncharacterized LOC389641 (LOC389641), long non-coding RNA [NR_033928]	chr8:23083336-23083395	hs|8p21.3	TGTCACCTCAACTCCACCGTCCCTGGTGTCAGGCAAGCCCGAGGGACCCAATTCTGCCTT
A_22_P00004191	LOC101928617	101928617	XR_246017	5.9963	11.32	3.84718	11.7216	10.1015	12.6856	10.7899	12.7337	1370.56	6479.12	1398.91	6383.46	P	P	P	P	0	XR_246017	XR_246017	Hs.434392	uncharacterized LOC101928617		THC2493438		PREDICTED: Homo sapiens uncharacterized LOC101928617 (LOC101928617), transcript variant X2, ncRNA [XR_246017]	chr12:92540460-92540518	hs|12q21.33	AGAAGAGTGGAAACCTTACTGGATGCGGACAGGAGAGCCAGTTACTGAAAGCAGATATAA
A_22_P00004297	CNPY3	10695	XR_427823	4.52167	7.45936	1.77907	8.31498	6.44993	8.62678	7.9098	8.74092	96.0683	434.433	190.083	423.348	P	P	P	P	0	XR_427823	XR_427823	Hs.636926	canopy FGF signaling regulator 3		THC2549186	GO:0002224(toll-like receptor signaling pathway)|GO:0005102(receptor binding)|GO:0005788(endoplasmic reticulum lumen)|GO:0045087(innate immune response)	PREDICTED: Homo sapiens canopy FGF signaling regulator 3 (CNPY3), transcript variant X7, misc_RNA [XR_427823]	chr6:42911580-42911639	hs|6p21.1	TCAACTAGAACCACGAGGGCTGATGGACAGACCACAAGGCCAGTTTGTTCCAGTTCAATG
A_22_P00004333			XR_243725	-3.45808	6.85948	-10.5642	7.71792	7.81261	6.02263	9.60361	6.2025	252.221	76.2094	619.447	73.1432	P	P	P	P	0	ENST00000576313	XR_243725	Hs.735596		ENST00000576313			PREDICTED: Homo sapiens uncharacterized LOC101927471 (LOC101927471), transcript variant X2, ncRNA [XR_243725]	chr17:55156708-55156649	hs|17q22	ATTAACCAACTGCCACTGGAGGCAAATCCAGAGACCAAGGGAGCAGTTTATACAGAAACA
A_22_P00004421	lnc-COPZ2-1			-2.22322	6.80748	-4.21105	6.32379	7.40815	6.25551	7.44536	5.37118	190.043	88.5282	136.927	40.9183	P	P	P	P	0	lnc-COPZ2-1:2		Hs.667258	lnc-COPZ2-1:2		THC2569645		LNCipedia lincRNA (lnc-COPZ2-1), lincRNA [lnc-COPZ2-1:2]	chr17:46124630-46124571	hs|17q21.32	CTATAGGACAAAGAGGTGTCAACTCAACTGTGTCTTCTTAGAAGAGCCCATTATTTATAG
A_22_P00004432	lnc-CORO6-1			6.15724	8.09969	3.61794	7.56555	6.89398	9.51627	6.69462	8.54978	130.305	782.914	83.1944	371.803	P	P	P	P	0	lnc-CORO6-1:1	AF086010	Hs.659026	lnc-CORO6-1:1		THC2724787		Homo sapiens full length insert cDNA clone YW04H08. [AF086010]	chr17:27971911-27971852	hs|17q11.2	TACCTCAATCAGGATCTCAGCAAGAAACAGCAGACTCAGATTAGGATTATTTGAGGAGGG
A_22_P00004669				-1.6819	5.64815	-7.61067	5.88396	6.03563	5.28554	7.52737	4.59935	71.1342	46.06	145.32	24.4938	P	P	P	P	0	ENST00000556653				ENST00000556653				chr14:104343756-104343815	hs|14q32.33	GAGCTGCTTCCTTTGACTCCTGCTGTGTGTAGTTCTGCTGACAATGACCTGGACAGCTCT
A_22_P00004695	RECQL4	9401	NM_004260	-9.7824	8.923	-8.68929	8.30472	10.7185	7.42829	10.0095	6.89028	2142.74	196.084	823.196	117.538	P	P	P	P	0	NM_004260	NM_004260	Hs.31442	RecQ protein-like 4	ENST00000529424	THC2603418	GO:0000405(bubble DNA binding)|GO:0000733(DNA strand renaturation)|GO:0005524(ATP binding)|GO:0005634(nucleus)|GO:0005737(cytoplasm)|GO:0006260(DNA replication)|GO:0006281(DNA repair)|GO:0006310(DNA recombination)|GO:0007275(multicellular organismal development)|GO:0008270(zinc ion binding)|GO:0016020(membrane)|GO:0032508(DNA duplex unwinding)|GO:0043140(ATP-dependent 3'-5' DNA helicase activity)	Homo sapiens RecQ protein-like 4 (RECQL4), mRNA [NM_004260]	chr8:145736888-145736829	hs|8q24.3	AGAAAATACCTGCACCTGAGCTTCCATGCCCTGGTGGGCCTGGCCACGGAAGAGCTCCTG
A_22_P00004960				-6.92077	7.91845	-2.32812	7.88682	9.43594	6.64501	8.51993	7.30076	839.464	115.703	289.341	157.778	P	P	P	P	0	ENST00000424886		Hs.640984		ENST00000424886			heat shock 60kDa protein 1 (chaperonin) pseudogene 6 [Source:HGNC Symbol;Acc:HGNC:5267] [ENST00000424886]	chr3:36810317-36810258	hs|3p22.2	AATGCTTCGGTTCCCCACTGTCTTTAGATAAGACCATTGTCCAGGGTATTGGTTCCTCAT
A_22_P00005087	DGAT1	8694	NM_012079	4.69955	8.25972	3.50026	7.77161	7.21855	9.45107	6.92025	8.72771	165.602	750.931	96.2069	417.974	P	P	P	P	0	NM_012079	NM_012079	Hs.521954	diacylglycerol O-acyltransferase 1	ENST00000620428	THC2552980	GO:0003846(2-acylglycerol O-acyltransferase activity)|GO:0004144(diacylglycerol O-acyltransferase activity)|GO:0005515(protein binding)|GO:0005789(endoplasmic reticulum membrane)|GO:0006641(triglyceride metabolic process)|GO:0006644(phospholipid metabolic process)|GO:0016021(integral to membrane)|GO:0016746(transferase activity, transferring acyl groups)|GO:0019432(triglyceride biosynthetic proce…	Homo sapiens diacylglycerol O-acyltransferase 1 (DGAT1), mRNA [NM_012079]	chr8:145538312-145538253	hs|8q24.3	ATCTCTGTGGAGCGGGGAACGGGACAGTTGTGTAAAAATCCAAAATACAATTCTGACTAT
A_22_P00005132	LINC00944	387895	NR_033878	25.7223	6.41779	1.66724	8.46112	4.48945	9.1744	8.10042	8.83788	23.2214	625.378	216.45	451.672	P	P	P	P	0	NR_033878	NR_033878	Hs.534660	long intergenic non-protein coding RNA 944	ENST00000546117	THC2725890		Homo sapiens long intergenic non-protein coding RNA 944 (LINC00944), long non-coding RNA [NR_033878]	chr12:127216948-127216889	hs|12q24.32	CTGTGGAATGGAATGACTCTCCAGAGCTGCAGATTGAAGGCATATTTTCATCTGACTTTG
A_22_P00005133	LINC00944	387895		21.3573	7.12092	1.68508	8.76544	5.24715	9.66381	8.39711	9.14993	41.078	861.659	264.629	555.675	P	P	P	P	0	ENST00000542248			long intergenic non-protein coding RNA 944	ENST00000542248	THC2671543		long intergenic non-protein coding RNA 944 [Source:HGNC Symbol;Acc:HGNC:48640] [ENST00000542248]	chr12:127245553-127245494	hs|12q24.32	TGACTGAAGCACTGCAGACAAGATAAAGACAGCCTGATGCAGAGGAAGATTGAGGACTAA
A_22_P00005150	lnc-DHX38-5			-8.54305	7.45229	-12.2774	6.48793	9.15862	6.06387	8.54436	4.92643	686.57	78.3302	294.504	30.3324	P	P	P	P	0	lnc-DHX38-5:1	AK125142	Hs.461285	lnc-DHX38-5:1		THC2607541		Homo sapiens cDNA FLJ43152 fis, clone D3OST2003024. [AK125142]	chr16:72825317-72825376	hs|16q22.2	GTCAGAACTTGAGTAGCACTAAACATATACCTGTTGACTGACTGGCTCATATTGGGTGTT
A_22_P00005153	lnc-DHX57-2			1.35423	7.19454	-7.63284	6.18791	6.97912	7.4166	7.82533	4.89311	139.545	194.796	178.692	29.5201	P	P	P	P	0	lnc-DHX57-2:1			lnc-DHX57-2:1		THC2671955		ALU1_HUMAN (P39188) Alu subfamily J sequence contamination warning entry, partial (7%) [THC2671955]	chr2:39220661-39220602	hs|2p22.1	ACATACGTCTGTAGTTACCCAGTAGTCTTTGTTGTCTTTGGGCCATCTAAAGTATATTTG
A_22_P00005330	KANK1	23189	NM_001256877	11.1084	6.7703	1.91492	5.26274	5.25273	8.72631	4.81492	5.75221	41.1987	461.655	22.6917	53.0919	P	P	P	P	0	NM_001256877	NM_001256877	Hs.306764	KN motif and ankyrin repeat domains 1	ENST00000619269	THC2535085	GO:0005515(protein binding)|GO:0005634(nucleus)|GO:0005737(cytoplasm)|GO:0006351(transcription, DNA-dependent)|GO:0006355(regulation of transcription, DNA-dependent)|GO:0008013(beta-catenin binding)|GO:0010977(negative regulation of neuron projection development)|GO:0030177(positive regulation of Wnt receptor signaling pathway)|GO:0030336(negative regulation of cell migration)|GO:0030837(negative…	Homo sapiens KN motif and ankyrin repeat domains 1 (KANK1), transcript variant 4, mRNA [NM_001256877]	chr9:549472-549531	hs|9p24.3	GGGGTCCCGTTCATGTTAAGCAGTTTTCCTTCCTTCAAAATAAAAAACTAGCAGTCCTTA
A_22_P00005607	lnc-EFR3B-4			-198.097	8.63162	-123.973	9.78228	13.2522	5.62209	13.8588	6.90488	13240.2	58.435	12259.1	118.718	P	P	P	P	0	lnc-EFR3B-4:1	AA262526	Hs.598879	lnc-EFR3B-4:1		THC2536709		zs17b08.r1 NCI_CGAP_GCB1 Homo sapiens cDNA clone IMAGE:685431 5' similar to TR:G1256011 G1256011 DYSTROBREVIN-ALPHA. ;, mRNA sequence [AA262526]	chr2:25650374-25650433	hs|2p23.3	AAGAACTGAGCGTGGGCCACGGGCTCTTACCTTCAGCAACTTCATCAGCTCTTCCAGCTG
A_22_P00005658	RALY-AS1	101926888	NR_109885	-2.32194	5.47625	-4.32302	5.48982	6.11753	4.9022	6.64648	4.53444	75.0864	35.0834	80.3774	23.6764	P	P	P	P	0	NR_109885	NR_109885	Hs.405849	RALY antisense RNA 1	ENST00000440595	THC2633654		Homo sapiens RALY antisense RNA 1 (RALY-AS1), transcript variant 1, long non-coding RNA [NR_109885]	chr20:32580927-32580868	hs|20q11.22	GAGACGAGGCAGGAAGAAACTCCTGGTCCTTTCGCTTTTAAGGAACGTGCCACCTAGACA
A_22_P00005915	HOTAIRM1	100506311	NR_038367	11.0806	6.90766	3.58722	8.90137	5.38724	8.8572	8.0275	9.87037	44.951	504.731	205.744	895.853	P	P	P	P	0	NR_038367	NR_038367	Hs.445239	HOXA transcript antisense RNA, myeloid-specific 1		THC2548787		Homo sapiens HOXA transcript antisense RNA, myeloid-specific 1 (HOTAIRM1), transcript variant 2, long non-coding RNA [NR_038367]	chr7:27135853-27135912	hs|7p15.2	ATTTGGAGTGCTGGAGCGAAGAAGAGCAAAAGCTGCGTTCTGCGCGCGCCCGACTCCGCT
A_22_P00005933	LOC102723922	102723922	XR_425957	-1.85846	6.77588	-4.08827	7.87804	7.23766	6.34356	8.959	6.92751	167.918	93.6314	390.522	120.46	P	P	P	P	0	XR_425957	XR_425957		uncharacterized LOC102723922		THC2664316		PREDICTED: Homo sapiens uncharacterized LOC102723922 (LOC102723922), ncRNA [XR_425957]	chr6:285980-285921	hs|6p25.3	AACAACAACTAACATGAGGACAACTGCTGGGAAGAGGCTGAAGCAATTGCAGCATGATCA
A_22_P00005977	LY86-AS1	285780	NR_026970	-8.79509	6.09635	-9.48382	6.99538	7.8632	4.7265	8.80387	5.5584	261.199	31.1094	350.865	46.4204	P	P	P	P	0	NR_026970	NR_026970	Hs.655737	LY86 antisense RNA 1		THC2503159		Homo sapiens LY86 antisense RNA 1 (LY86-AS1), long non-coding RNA [NR_026970]	chr6:6369294-6369235	hs|6p25.1	AGATTTGGAGGGCATGGATCTTCTGACAGTAGGGGCCATTCTAGGATTTTTTGGTTGAAG
A_22_P00005979				-2.14288	6.72521	-4.83373	7.32365	7.29742	6.19787	8.54788	6.27475	175.021	85.5324	295.187	76.6201	P	P	P	P	0	ENST00000432823				ENST00000432823				chr6:6711176-6711117	hs|6p25.1	ACTGATCAGAGATCCCACCGTGAGTCCAGCTCCTGGTCCCATGCTCTGGATATATCGGTC
A_22_P00006018				3.55332	10.5273	6.59235	10.7303	9.65233	11.4815	9.45576	12.1766	984.84	2877.4	554.553	4364.89	P	P	P	P	0	ENST00000565797	BC067908	Hs.143408		ENST00000565797	THC2606403		Homo sapiens cDNA clone IMAGE:30332316. [BC067908]	chr19:1874971-1874912	hs|19p13.3	CATCTATGTTACGTTGATCATTGTTACCACTGACAGTCGTTTCGAGATTGGAAAATATGT
A_22_P00006034			XR_245975	6.42546	7.88308	9.89732	6.04256	6.65457	9.33837	4.6112	7.91824	110.07	701.437	19.9754	241.756	P	P	P	M	0	ENST00000552063	XR_245975			ENST00000552063	THC2667963		PREDICTED: Homo sapiens uncharacterized LOC101927116 (LOC101927116), transcript variant X1, ncRNA [XR_245975]	chr12:47651263-47651322	hs|12q13.11	GAGCGTTTCTGATCCAGCTCCCCGTTTTTAATAAGGAACTCTTCAACAAGAAATAAACTC
A_22_P00006145	lnc-FAM18A-1			-5.37982	6.55629	-3.56766	5.91514	7.88148	5.45392	6.90336	5.06838	265.282	51.9904	95.1245	33.3406	P	P	P	P	0	lnc-FAM18A-1:1	BC021142	Hs.729864	lnc-FAM18A-1:1		THC2614840		Homo sapiens, clone IMAGE:4872114, mRNA. [BC021142]	chr16:11032802-11032743	hs|16p13.13	TCTTTACCACATCAACAGAAACACTTCCCCTTCCAAATGAAAACATTGGCATATTCTGAA
A_22_P00006212	lnc-FAM43A-8			-8.26594	6.26865	-2.50521	6.22892	7.97474	4.92756	6.92651	5.60158	282.979	35.7162	96.7022	47.904	P	P	P	P	0	lnc-FAM43A-8:2	AK091527	Hs.407087	lnc-FAM43A-8:2		THC2503254		LNCipedia lincRNA (lnc-FAM43A-8), lincRNA [lnc-FAM43A-8:2]	chr3:194218805-194218864	hs|3q29	AGAAAGAATTGCTCACTGGAAGGATCATAGGTGGCACTCATGTCTCACTGCCCCACTCAG
A_22_P00006233	lnc-FAM55B-1			-6.11978	7.02903	-3.29163	8.73286	8.4562	5.84272	9.63445	7.91565	405.858	67.5363	635.454	241.145	P	P	P	P	0	lnc-FAM55B-1:1			lnc-FAM55B-1:1				LNCipedia lincRNA (lnc-FAM55B-1), lincRNA [lnc-FAM55B-1:1]	chr11:115045985-115046044	hs|11q23.3	AGGAATGAAAGTTTCACACAGATTCGAGTTGGAAATCCCAGCATGACAAATATCTGTAAT
A_22_P00006335	lnc-FANCI-1			-8.04595	8.00956	-23.5026	8.97435	9.6537	6.64544	11.5362	6.98142	985.516	115.726	2338.74	125.063	P	P	P	P	0	lnc-FANCI-1:1	BC031940	Hs.369935	lnc-FANCI-1:1		THC2606156		Homo sapiens cDNA clone IMAGE:4838568. [BC031940]	chr15:89879255-89879314	hs|15q26.1	CAGCATTGAGCCCTGGTCCCTTCTATTTAAATATGAAATATTTTGCATACACTTTTCTAG
A_22_P00006360	lnc-FAS-1		XM_006717819	-4.38844	6.10837	-3.09193	5.85722	7.26769	5.13399	6.72781	5.0993	171.094	41.6428	84.8887	33.8794	P	P	P	P	0	lnc-FAS-1:1	XM_006717819	Hs.667309	lnc-FAS-1:1		THC2605665		PREDICTED: Homo sapiens Fas cell surface death receptor (FAS), transcript variant X1, mRNA [XM_006717819]	chr10:90776607-90776666	hs|10q23.31	GTCTTCTGACCTCTGATTAGATCAGACACTTTTTAGATATTGAATCATCAGTTTCTGTAC
A_22_P00006547	lnc-FKBP2-1			-6.3171	6.91766	-8.65025	6.02178	8.37391	5.71465	7.77603	4.66329	381.72	62.2371	172.423	25.4911	P	P	P	P	0	lnc-FKBP2-1:2			lnc-FKBP2-1:2		THC2694638		Q2AC61_9BURK (Q2AC61) HrpW, partial (3%) [THC2716184]	chr11:64015464-64015523	hs|11q13.1	TCTGCTGGTGCTACCAGGCTTGAACAGTCTTCAAATCCACTGCTATTAGGCAAATTACCT
A_22_P00006901	SCARNA10	692148	NR_004387	10.618	10.634	23.4349	10.057	9.0655	12.4739	8.03584	12.5864	639.914	5540.04	207.004	5738.09	P	P	P	M	0	NR_004387	NR_004387		small Cajal body-specific RNA 10		THC2764250		Homo sapiens small Cajal body-specific RNA 10 (SCARNA10), guide RNA [NR_004387]	chr12:6619554-6619613	hs|12p13.31	TAATAGGGGTGATTCTTCCAGTTGCTGGAGAGAAATTGTGGTAACTGGAGTGAGAGAGTA
A_22_P00007020	ZNF337-AS1	102724826	NR_126465	-1.24488	6.70978	-4.92063	6.68514	6.86964	6.55364	7.93265	5.63381	127.954	108.224	193.287	48.9139	P	P	P	P	0	NR_126465	NR_126465	Hs.633621	ZNF337 antisense RNA 1		THC2502091		Homo sapiens ZNF337 antisense RNA 1 (ZNF337-AS1), transcript variant 1, long non-coding RNA [NR_126465]	chr20:25657624-25657683	hs|20p11.1	ATGTGCAAGTCCAAGATTCTTGGGCCGCAGGACATGTTCTGCATATATTCCTGGAGAATA
A_22_P00007174	LOC101929440	101929440	XR_243332	4.22572	5.38948	1.91493	5.39623	4.44923	6.52843	4.94789	5.88518	22.687	106.25	24.5632	58.0443	P	P	P	P	0	XR_243332	XR_243332	Hs.738231	uncharacterized LOC101929440		THC2736957		PREDICTED: Homo sapiens uncharacterized LOC101929440 (LOC101929440), ncRNA [XR_243332]	chr16:1462185-1462244	hs|16p13.3	CTGACTTGTATTTTCCCTGTTTTCCCATTTTGCATACTTCAGAATAAAGACATCTGTTCA
A_22_P00007282	lnc-GPR19-1			4.33948	6.96962	3.11251	6.15662	5.99083	8.10834	5.39182	7.0299	69.0529	310.173	33.4219	129.294	P	P	P	P	0	lnc-GPR19-1:1	AL049239	Hs.207162	lnc-GPR19-1:1		THC2767828		Homo sapiens mRNA; cDNA DKFZp564B023 (from clone DKFZp564B023). [AL049239]	chr12:12876932-12876873	hs|12p13.1	TTACAGATGAGGGAGCAACACTTGATGGCCTTCTCGTCCCGAGGCACCAGCCAGCCCGAC
A_22_P00007635	FAM13A-AS1	285512	NR_002806	31.3797	9.0097	9.4005	9.50445	6.86047	11.8322	8.02455	11.2573	127.098	3650.18	205.189	2338.53	P	P	P	P	0	NR_002806	NR_002806	Hs.744957	FAM13A antisense RNA 1		THC2475293		Homo sapiens FAM13A antisense RNA 1 (FAM13A-AS1), long non-coding RNA [NR_002806]	chr4:89649775-89649834	hs|4q22.1	TCAGCCATAGGAGTGCGGTCTTCCTTCTGGACATTTCTAATGCAAATAAAGGAAAAAGGG
A_22_P00007717	PSMB8-AS1	100507463	NR_037173	4.41647	8.87721	2.47024	9.27476	7.87019	10.0131	8.64534	9.94999	262.74	1086.56	315.304	945.845	P	P	P	P	0	NR_037173	NR_037173	Hs.731555	PSMB8 antisense RNA 1 (head to head)	ENST00000412095	THC2531032		Homo sapiens PSMB8 antisense RNA 1 (head to head) (PSMB8-AS1), transcript variant 1, long non-coding RNA [NR_037173]	chr6:32813210-32813269	hs|6p21.32	ACGAGGAGCTTGGAAAGGAGGTAACACACTCAAGGCAAATTTCAAGTAACTCATCCTGGA
A_22_P00007883	HSD17B11	51170	NM_016245	5.04408	9.76308	7.45594	10.0814	8.66532	10.9999	8.73586	11.6342	478.281	2121.35	335.763	3030.54	P	P	P	P	0	NM_016245	NM_016245	Hs.594923	hydroxysteroid (17-beta) dehydrogenase 11	ENST00000502576	THC2730137	GO:0004303(estradiol 17-beta-dehydrogenase activity)|GO:0005576(extracellular region)|GO:0005737(cytoplasm)|GO:0005811(lipid particle)|GO:0006694(steroid biosynthetic process)|GO:0006710(androgen catabolic process)|GO:0016229(steroid dehydrogenase activity)|GO:0055114(oxidation-reduction process)	Homo sapiens hydroxysteroid (17-beta) dehydrogenase 11 (HSD17B11), mRNA [NM_016245]	chr4:88261713-88261654	hs|4q22.1	GCATGGGATTCTGACTGAGCAGAAGATGATTTTTATTCCATCTTCTATAGCTTTTTTAAC
A_22_P00007956				-16.1448	7.13229	-6.33425	7.72373	9.41565	5.40266	9.16926	6.50609	828.617	50.2898	453.033	90.0104	P	P	P	P	0	ENST00000423967		Hs.528165		ENST00000423967	THC2707429		CR741364 NCI_CGAP_GCB1 Homo sapiens cDNA clone IMAGp971I1355 ; IMAGE:824994 5', mRNA sequence [CR741364]	chr21:45626644-45626585	hs|21q22.3	ACAGCCAGGAGACTGATTTTGTATCCAGAAGTTTCTGTTTCACAATCACTAAACTACTCA
A_22_P00007997				6.07614	8.30693	5.01552	6.54108	7.1067	9.70986	5.4805	7.8069	153.213	891.339	35.5044	223.948	P	P	P	P	0	ENST00000605240				ENST00000605240	THC2750114			chr11:333580-333639	hs|11p15.5	CTGGTGTATTTAAAGTCTGTGTTGATGGGTGCATATATTTTTAACGTTTCCCTATTGTGA
A_22_P00008282	lnc-ISCU-1			-5.73804	7.21385	-3.21401	7.71662	8.58339	6.06283	8.60463	6.92025	445.146	78.2743	307.762	120.015	P	P	P	P	0	lnc-ISCU-1:2		Hs.574082	lnc-ISCU-1:2				TCBAP1E4443 Pediatric pre-B cell acute lymphoblastic leukemia Baylor-HGSC project=TCBA Homo sapiens cDNA clone TCBAP4443, mRNA sequence [BE246772]	chr12:109030172-109030231	hs|12q24.11	AATGAAGCCCAAGAAAAATACTCCAAGTTGCCTTCCAAGATTGAAGCAATGATATCTGAG
A_22_P00008392	lnc-JMJD7-PLA2G4B-2			5.6678	6.6863	4.77729	6.19106	5.551	8.05379	5.16491	7.4211	50.403	298.166	28.3352	171.043	P	P	P	P	0	lnc-JMJD7-PLA2G4B-2:1			lnc-JMJD7-PLA2G4B-2:1				LNCipedia lincRNA (lnc-JMJD7-PLA2G4B-2), lincRNA [lnc-JMJD7-PLA2G4B-2:1]	chr15:42190647-42190706	hs|15q15.1	AAATCAGTTTGCCTGGGCATCTGTAAACCTTTGGGCAAGTGAATTCCCTCTTCTCTCTCA
A_22_P00008499	lnc-KCNE4-1			1.06203	5.91406	7.91849	7.28002	5.87081	5.95763	5.93884	8.92407	63.4381	72.8596	48.8665	481.154	P	P	P	P	0	lnc-KCNE4-1:1	AK097081	Hs.661297	lnc-KCNE4-1:1		THC2502755		Homo sapiens cDNA FLJ39762 fis, clone SPLEN1000156. [AK097081]	chr2:223763901-223763960	hs|2q36.1	AGCTGAGGCCTTTTAAAACTAGATTGGAAACCTAGAAGCTGTGAAAGAAAAATTGACAGA
A_22_P00008601	KDM4C	23081	NM_001146696	-38.3081	6.81058	-50.2964	7.66914	9.93046	4.67088	10.9995	5.34712	1208.61	29.7452	1612.9	40.188	P	P	P	P	0	NM_001146696	NM_001146696	Hs.709425	lysine (K)-specific demethylase 4C	ENST00000452643	THC2545803	GO:0000790(nuclear chromatin)|GO:0005654(nucleoplasm)|GO:0006325(chromatin organization)|GO:0006351(transcription, DNA-dependent)|GO:0006357(regulation of transcription from RNA polymerase II promoter)|GO:0008270(zinc ion binding)|GO:0008284(positive regulation of cell proliferation)|GO:0019899(enzyme binding)|GO:0032454(histone demethylase activity (H3-K9 specific))|GO:0033169(histone H3-K9 deme…	Homo sapiens lysine (K)-specific demethylase 4C (KDM4C), transcript variant 4, mRNA [NM_001146696]	chr9:6720906-6720965	hs|9p24.1	TGGAGTGTTCTGCATTCATGTGGAAGAGGCTAAAGGATGTTTGATGAAGCACTATGGGCT
A_22_P00008647				-4.93076	5.22813	-2.54377	5.44624	6.50421	4.2024	6.16121	4.81424	99.6707	19.895	56.8298	27.8796	P	P	P	P	0	ENST00000558783	AY358648	Hs.81892		ENST00000558783	THC2659272		ens	chr15:64665956-64665897	hs|15q22.31	CCACCCATCCTCCAGCACACTGAGCAGCAAGCTGGACACACGGCACACTGATCCAAATGG
A_22_P00008922				4.71603	7.20997	2.26267	8.60633	6.17747	8.41505	8.03744	9.21547	78.3629	379.038	207.323	578.956	P	P	P	P	0	ENST00000435469				ENST00000435469	THC2559218		long intergenic non-protein coding RNA 674 [Source:HGNC Symbol;Acc:HGNC:44355] [ENST00000435469]	chr17:66111561-66111620	hs|17q24.2	CACTGTAGCTCTCTACTGAAATGTTTTAAGGATCATTGTAATTCTGCTTTCCCTAATCTT
A_22_P00009085	LOC100507006	100507006	NR_120420	-6.10447	9.36816	-4.02542	10.3433	10.7635	8.15368	11.3965	9.3874	2219.7	318.762	2130.86	647.275	P	P	P	P	0	NR_120420	NR_120420		uncharacterized LOC100507006		THC2699723		Homo sapiens uncharacterized LOC100507006 (LOC100507006), long non-coding RNA [NR_120420]	chr2:64478412-64478471	hs|2p14	TTCCTTTGATTGGTGGATTTCAGAAATAGGCCATCAGCGGAATTCATTATATTCAGCTAA
A_22_P00009092	LOC101927902	101927902	XR_242326	3.54811	7.78409	10.5883	7.16611	6.92398	8.75103	5.66331	9.0677	133.036	469.025	40.2528	530.626	P	P	P	P	0	ENST00000415513	XR_242326	Hs.561671	uncharacterized LOC101927902	ENST00000415513	THC2703001		PREDICTED: Homo sapiens uncharacterized LOC101927902 (LOC101927902), ncRNA [XR_242326]	chr7:104581976-104582035	hs|7q22.3	AGAACTTTCCCAATCCTGTGCAATGCCTGAGTGGTACATTGTATTCTATGAGAATGGCGC
A_22_P00009100	HORMAD2-AS1	101929664	NR_110541	1.50833	6.78	-4.25295	7.54271	6.49	7.08295	8.65888	6.57042	98.6537	155.83	317.901	93.865	P	P	P	M	0	NR_110541	NR_110541	Hs.679526	HORMAD2 antisense RNA 1		THC2643721		Homo sapiens HORMAD2 antisense RNA 1 (HORMAD2-AS1), long non-coding RNA [NR_110541]	chr22:30476176-30476117	hs|22q12.2	GCCACCTATACAACGACAGCCTGCTCCGGGGCTTCCTGAGGAGGTGCCTGCCCCGCCGAG
A_22_P00009101	lnc-LIFR-1			13.9627	7.34369	5.65928	7.66142	5.68419	9.48769	6.51246	9.01308	55.3254	770.887	73.0094	510.962	P	P	P	M	0	lnc-LIFR-1:1			lnc-LIFR-1:1		THC2725108		LNCipedia lincRNA (lnc-LIFR-1), lincRNA [lnc-LIFR-1:1]	chr5:38468400-38468341	hs|5p13.1	ACGGGACCCACCAGCTTAAATGCCGGCAGCCCTGGGACTTCTGGCCTCACAATGGTTGAG
A_22_P00009113	THAP9-AS1	100499177	NR_034077	2.20739	7.15206	6.30948	7.04466	6.60367	7.74601	5.84012	8.49764	106.482	243.681	45.8217	359.341	P	P	P	P	0	NR_034077	NR_034077	Hs.728916	THAP9 antisense RNA 1	ENST00000507051	THC2568462		Homo sapiens THAP9 antisense RNA 1 (THAP9-AS1), transcript variant 3, long non-coding RNA [NR_034077]	chr4:83821587-83821528	hs|4q21.22	TGCGAAGCAGAGAGGCAGGACCAAAATTGAGGCGAATCCAGGAACCTGCCAATGGGTCTC
A_22_P00009205	LOC100506457	100506457	NR_110198	-10.1931	6.78531	-59.886	7.92695	8.6637	5.31419	11.4109	5.50673	477.406	47.0457	2150.04	44.7626	P	P	P	P	0	NR_110198	NR_110198	Hs.197824	uncharacterized LOC100506457	ENST00000450916	THC2716774		Homo sapiens uncharacterized LOC100506457 (LOC100506457), transcript variant 3, long non-coding RNA [NR_110198]	chr2:12147908-12147967	hs|2p25.1	TGAAGCTGGAGAGGCCTGTGTTGGAAACTGTGCTCTGTCCCATGCCAGTTCCCTGACCTT
A_22_P00009218	lnc-LPPR5.1-1			2.1912	8.15513	4.61927	8.88149	7.60887	8.7406	7.84599	10.0537	219.325	466.358	181.23	1018.29	P	P	P	P	0	lnc-LPPR5.1-1:1			lnc-LPPR5.1-1:1				LNCipedia lincRNA (lnc-LPPR5.1-1), lincRNA [lnc-LPPR5.1-1:1]	chr1:97885622-97885563	hs|1p21.3	CTGCCACTCCCAGTGTCCTCTACTGTCCCTTGTGGTTTTCCTGCACAAGGCTATATCTTT
A_22_P00009237				-3.03915	6.7121	-8.30681	6.05202	7.56166	5.95799	7.76887	4.71458	212.15	72.8705	171.596	26.1643	P	P	P	P	0	ENST00000451149				ENST00000451149	THC2688196			chr1:113589523-113589582	hs|1p13.2	CATTAAAACATCAAGACCTAGGTAACGCACCACTGAAATTTCATAATATGGAGGATATGT
A_22_P00009238	lnc-LRIG2-3			-5.74677	6.7521	-4.22745	6.246	8.13029	5.60754	7.37187	5.29208	316.386	57.8528	129.85	38.7805	P	P	P	P	0	lnc-LRIG2-3:1	BC030759	Hs.550817	lnc-LRIG2-3:1		THC2725534		Homo sapiens cDNA clone IMAGE:4798168. [BC030759]	chr1:113517789-113517848	hs|1p13.2	TTCGATGCAGAGCTCCAACCGAACTAGCAAAGAACATTTCCTCAAAGAAACGGAGTATTT
A_22_P00009378				-16.0374	7.47145	-42.4516	8.62223	9.73662	5.73325	11.7401	6.33237	1051.52	62.9305	2700.69	79.6629	P	P	P	P	0	ENST00000522975	BG531614	Hs.637330		ENST00000522975			602561749F1 NIH_MGC_61 Homo sapiens cDNA clone IMAGE:4699308 5', mRNA sequence [BG531614]	chr5:157602485-157602544	hs|5q33.3	ACACGTCTCAGCCCTGGTCTTTGGCCTTGACTTACACCAGATCAGTGGGAAAAAGAAACA
A_22_P00009484	lnc-MAGEB1-1			-2.20045	5.20117	5.25986	6.74322	5.80109	4.66329	5.65121	8.04624	60.3303	29.571	39.962	264.742	P	P	P	P	0	lnc-MAGEB1-1:1			lnc-MAGEB1-1:1				LNCipedia lincRNA (lnc-MAGEB1-1), lincRNA [lnc-MAGEB1-1:1]	chrX:30689902-30689961	hs|Xp21.2	TGTTTGCCTGTCACTGGGCTCAAGGAATTACAAAGTATAAAGAGTTACAGTAGCAATTCC
A_22_P00009537	LINC00173	100287569	NR_027346	-2.3476	7.23692	-6.05032	7.43263	7.87865	6.64746	8.84371	6.2467	264.664	115.876	360.034	75.1921	P	P	P	P	0	NR_027346	NR_027346	Hs.441601	long intergenic non-protein coding RNA 173	ENST00000470091	THC2665867		Homo sapiens long intergenic non-protein coding RNA 173 (LINC00173), transcript variant 2, long non-coding RNA [NR_027346]	chr12:116974257-116974316	hs|12q24.22	TGGAGACTCCTATTCACCCTTCAGATCAATATCCCCCAAATAAACTCCCAGTCACTCTGG
A_22_P00009722	MCTP2	55784	NM_018349	4.29418	9.98344	34.8081	7.74763	8.98744	11.0898	5.59916	10.7205	606.736	2246.83	38.6114	1602.31	P	P	P	P	0	NM_018349	NM_018349	Hs.33368	multiple C2 domains, transmembrane 2	ENST00000357742	THC2605761	GO:0005509(calcium ion binding)|GO:0005544(calcium-dependent phospholipid binding)|GO:0016020(membrane)|GO:0016021(integral to membrane)|GO:0019722(calcium-mediated signaling)	Homo sapiens multiple C2 domains, transmembrane 2 (MCTP2), transcript variant 1, mRNA [NM_018349]	chr15:95027097-95027156	hs|15q26.2	CAAAACCTGCCTCTCATTTATGTATTAGGAATCTTGTGACAACGGAACAGTTGAAAAATT
A_22_P00009741	lnc-MDH1B-2			3.1757	5.74736	5.45232	6.17534	4.97395	6.64102	5.07193	7.5188	33.6805	115.377	26.5236	182.814	P	M	P	M	0	lnc-MDH1B-2:1			lnc-MDH1B-2:1				LNCipedia lincRNA (lnc-MDH1B-2), lincRNA [lnc-MDH1B-2:1]	chr2:207986395-207986336	hs|2q33.3	AAAGTGGAAAGACTCCTATTGGGAATTCACTCAGGGAGGCACCAGGCATTGTTAGAAAAG
A_22_P00009777				4.30089	7.64761	-1.86518	8.19256	6.66735	8.77199	8.65455	7.75524	110.84	475.79	317.189	215.675	P	P	P	P	0	ENST00000551940	DB065886	Hs.609493		ENST00000551940	THC2747390		DB065886 TESTI4 Homo sapiens cDNA clone TESTI4007070 5', mRNA sequence [DB065886]	chr12:116077510-116077451	hs|12q24.21	TCCCTGGTCCTCTCACAGTGGCTGTGGTCTCAGCCTGAGATAAAAGGCCAGAAGCAGGAA
A_22_P00009816	LOC101927632	101927632	XR_242320	2.69151	5.76315	4.79075	6.708	5.09303	6.52145	5.67241	7.93265	36.7783	105.801	40.4533	243.942	P	P	P	P	0	XR_242320	XR_242320		uncharacterized LOC101927632		THC2568517		PREDICTED: Homo sapiens uncharacterized LOC101927632 (LOC101927632), transcript variant X1, ncRNA [XR_242320]	chr7:100036068-100036125	hs|7q22.1	AGGAAGATCTCAATGGTGGAACACTAGAGGCTTTCCTGCTAAAGTTAAGAACAAGCAAGT
A_22_P00009864				2.38813	6.37623	6.05288	6.11473	5.77913	7.03501	4.95234	7.54996	59.2806	151.201	24.5928	186.703	P	P	P	P	0	ENST00000584867	BU568811	Hs.127144		ENST00000584867	THC2786653			chr18:1906618-1906559	hs|18p11.32	AACAGCTCACCTGCCTGGCTTGTTGGAGCAACAAGAAACTTTAAGAGCAATCCTCCATTT
A_22_P00009924	TAF1A-AS1	100506161	NR_110614	-1.5919	6.53871	-5.87794	6.63675	6.88268	6.21194	8.03627	5.48096	129.182	86.337	207.129	44.0522	P	P	P	P	0	NR_110614	NR_110614	Hs.553851	TAF1A antisense RNA 1				Homo sapiens TAF1A antisense RNA 1 (TAF1A-AS1), transcript variant 1, long non-coding RNA [NR_110614]	chr1:222765583-222765642	hs|1q41	AGTATGAAAGACCACATGGAAAGAGAGGCCACATGGAACCAACAGTCAGCATCTTGGTTT
A_22_P00010103				-1.54506	7.84779	-12.5323	7.25207	8.1679	7.54024	9.30167	5.65409	326.105	211.232	498.488	49.5514	P	P	P	P	0	ENST00000413311				ENST00000413311	THC2718388			chr2:216804093-216804034	hs|2q35	TTCATTGTAACACGCCACCTGGTCACAAGATTATGGGGAAATAAATATATCGTCTTCACT
A_22_P00010168	LOC100507291	100507291	NR_121609	-2.92275	5.9129	-6.14181	6.35126	6.73696	5.18964	7.79415	5.17549	116.523	43.3528	174.5	35.6678	P	P	P	P	0	NR_121609	NR_121609	Hs.97661	uncharacterized LOC100507291		THC2539585		Homo sapiens uncharacterized LOC100507291 (LOC100507291), transcript variant 2, long non-coding RNA [NR_121609]	chr3:139141897-139141956	hs|3q23	AAGTATAAAAGACCATAAAAGACCATCTAGGGACTTCAGAACCCAAATAATGACACAATG
A_22_P00010275	lnc-MTMR9-1			-1.05912	6.65923	-6.67831	6.06615	6.7008	6.61793	7.58861	4.84913	113.618	113.448	151.117	28.5613	P	P	P	P	0	lnc-MTMR9-1:1			lnc-MTMR9-1:1		THC2566319		ALU4_HUMAN (P39191) Alu subfamily SB2 sequence contamination warning entry, partial (13%) [THC2566319]	chr8:10982238-10982297	hs|8p23.1	TGAGTAAAAGACGGCTCCATTATCTCCAGGGCATGAGGAAAATACAGGGCACTTTTTAAA
A_22_P00010386	MYL6B	140465	NM_001199629	-9.57578	10.6731	-11.8568	11.1783	12.4265	9.16715	13.1035	9.5359	7446.97	621.753	7116.74	723.982	P	P	P	P	0	NM_001199629	NM_001199629	Hs.632731	myosin, light chain 6B, alkali, smooth muscle and non-muscle	ENST00000548571	THC2489190	GO:0003774(motor activity)|GO:0005509(calcium ion binding)|GO:0005515(protein binding)|GO:0005829(cytosol)|GO:0005859(muscle myosin complex)|GO:0006936(muscle contraction)|GO:0007519(skeletal muscle tissue development)|GO:0008152(metabolic process)|GO:0008307(structural constituent of muscle)|GO:0016459(myosin complex)|GO:0016461(unconventional myosin complex)|GO:0030049(muscle filament sliding)|…	Homo sapiens myosin, light chain 6B, alkali, smooth muscle and non-muscle (MYL6B), transcript variant 1, mRNA [NM_001199629]	chr12:56551270-56551329	hs|12q13.2	AGGAGGTGGAGACCGTTCTGGCAGGACACGAGGACAGCAACGGCTGCATCAACTACGAGG
A_22_P00010460	lnc-NADSYN1-1			2.54205	8.22664	4.13868	8.06708	7.58112	8.92712	7.1073	9.15647	215.549	528.794	109.029	558.444	P	P	P	P	0	lnc-NADSYN1-1:1		Hs.673822	lnc-NADSYN1-1:1		THC2702357		AGENCOURT_7594107 NIH_MGC_70 Homo sapiens cDNA clone IMAGE:6021606 5', mRNA sequence [BQ233862]	chr11:71159777-71159836	hs|11q13.4	GTTTCCCCCTCGGCAAATGGGGCTTCAGCGGCTCGCGACGCACATTGATGGAGCGTATGT
A_22_P00010729	LYST	1130	NR_102436	5.3294	5.58797	14.0075	6.18482	4.50985	6.92382	4.56722	8.37535	23.606	140.716	19.525	330.23	P	P	P	P	0	NR_102436	NR_102436	Hs.658838	lysosomal trafficking regulator		THC2546257	GO:0002446(neutrophil mediated immunity)|GO:0002456(T cell mediated immunity)|GO:0005515(protein binding)|GO:0005543(phospholipid binding)|GO:0005829(cytosol)|GO:0006644(phospholipid metabolic process)|GO:0007017(microtubule-based process)|GO:0007040(lysosome organization)|GO:0007596(blood coagulation)|GO:0012505(endomembrane system)|GO:0015630(microtubule cytoskeleton)|GO:0019898(extrinsic to me…	Homo sapiens lysosomal trafficking regulator (LYST), transcript variant 2, non-coding RNA [NR_102436]	chr1:235990765-235990706	hs|1q42.3	ATGAATAGGAGCACTTCTTGAGTACTCTGGGGTGATTTAAGCCCTTTCCCACCAACTGTA
A_22_P00011169				10.6307	6.52269	4.79564	5.99548	5.03678	8.44695	4.97034	7.23206	35.2259	387.221	24.8244	150.109	P	P	P	P	0	ENST00000585275				ENST00000585275	THC2637348		Q7M4S3_HUMAN (Q7M4S3) 50K integrin-associated protein (Fragments), partial (19%) [THC2637348]	chr17:8241100-8241159	hs|17p13.1	CAGAAGGCATGACACCTCTAGGACCCATTCTCATCCTACATCCTCCTCTTTCTGGTGCTG
A_22_P00011332	lnc-OTOA-1		XM_006721049	3.95153	8.93316	4.1754	9.74512	7.99677	9.97918	8.76854	10.8305	287.826	1060.46	343.287	1728.58	P	P	P	P	0	lnc-OTOA-1:1	XM_006721049	Hs.709488	lnc-OTOA-1:1		THC2748784		PREDICTED: Homo sapiens methyltransferase like 9 (METTL9), transcript variant X1, mRNA [XM_006721049]	chr16:21638658-21638717	hs|16p12.2	TTAGGTAATTGTTTTGGTAAATGGCTTGAAGTTGAACCACAGCAGTTTTGCTATTTGGAA
A_22_P00011370	P2RX7	5027		1.46713	10.6048	41.6301	7.03376	10.3319	10.8849	4.84074	10.2203	1619.87	1964.7	23.0421	1145.78	P	P	P	M	0	ENST00000328963	AF086044	Hs.439682	purinergic receptor P2X, ligand gated ion channel, 7	ENST00000328963	THC2522962	GO:0000187(activation of MAPK activity)|GO:0000287(magnesium ion binding)|GO:0000902(cell morphogenesis)|GO:0001530(lipopolysaccharide binding)|GO:0001614(purinergic nucleotide receptor activity)|GO:0001845(phagolysosome assembly)|GO:0001916(positive regulation of T cell mediated cytotoxicity)|GO:0002028(regulation of sodium ion transport)|GO:0004931(extracellular ATP-gated cation channel activit…	purinergic receptor P2X, ligand-gated ion channel, 7 [Source:HGNC Symbol;Acc:HGNC:8537] [ENST00000328963]	chr12:121625756-121625815	hs|12q24.31	AACCCTTCCTGATTTTAGCCTGGCAATGTAAGTGTCCTTAATGTGACTGTTTTGATAATT
A_22_P00011727				3.9253	5.71476	6.35317	6.42812	4.81287	6.78567	5.23129	7.89876	29.8618	128.03	29.8114	238.489	P	P	P	P	0	ENST00000448204				ENST00000448204				chr2:64559218-64559159	hs|2p14	TGCCCTTTACTCTGCGGAGCCCAGCTTCCTACTGCAGTAAACTCTCACATGGCCAAGAAG
A_22_P00011812	lnc-PHACTR4-2			-8.48894	5.75909	-2.6704	5.49435	7.50495	4.41937	6.24838	4.83132	203.422	23.9075	60.6602	28.2481	P	P	P	P	0	lnc-PHACTR4-2:2			lnc-PHACTR4-2:2		THC2518956		ALU1_HUMAN (P39188) Alu subfamily J sequence contamination warning entry, partial (7%) [THC2518956]	chr1:28834723-28834782	hs|1p35.3	TTCTGTAATGGAAATAGGATTGAAGAGACTTTTATTCTAGTTGGTCAGGATTTACCTCTG
A_22_P00011910	IDH1-AS1	100507475	NR_046452	-4.80544	6.83593	-4.98488	6.84601	8.06141	5.79674	8.10217	5.78461	301.12	65.4924	216.69	54.3055	P	P	P	P	0	NR_046452	NR_046452	Hs.668038	IDH1 antisense RNA 1		THC2579173		Homo sapiens IDH1 antisense RNA 1 (IDH1-AS1), long non-coding RNA [NR_046452]	chr2:209120795-209120854	hs|2q34	CGGTGGATTGAAAAAAGAATTTTAGTCTCCTCCAGAGATTATATTTTGTGTGTTCATTGC
A_22_P00011922	lnc-PITPNC1-1			5.84857	6.93164	3.04803	7.64881	5.77371	8.32179	6.88701	8.49489	59.0882	355.841	94.1038	358.713	P	P	P	P	0	lnc-PITPNC1-1:1			lnc-PITPNC1-1:1				LNCipedia lincRNA (lnc-PITPNC1-1), lincRNA [lnc-PITPNC1-1:1]	chr17:65241843-65241902	hs|17q24.2	CGGGAACTGGGAGGACGCCGTGTCCCCGAGTCCACCAGCGTCGAAGCACGATTTAAAAAA
A_22_P00011998	ITGA9-AS1	101928153	NR_110531	-5.29109	6.92382	-1.32653	5.92354	8.22913	5.82556	6.13087	5.72322	341.666	66.8964	55.7244	52.0792	P	P	P	P	0	NR_110531	NR_110531		ITGA9 antisense RNA 1				Homo sapiens ITGA9 antisense RNA 1 (ITGA9-AS1), transcript variant 1, long non-coding RNA [NR_110531]	chr3:37795479-37795420	hs|3p22.2	GTGGACACAGCCTGCCTCCCATAAGCTGTCTGGCTCACTCATTTTATTCCTGGAAATCAG
A_22_P00012038	MTURN	222166	NM_152793	5.55401	7.63122	12.3695	7.51026	6.49402	8.96755	5.91195	9.54067	98.8742	541.998	48.0155	726.364	P	P	P	P	0	NM_152793	NM_152793	Hs.200100	maturin, neural progenitor differentiation regulator homolog (Xenopus)	ENST00000324489	THC2620619	GO:0007275(multicellular organismal development)	Homo sapiens maturin, neural progenitor differentiation regulator homolog (Xenopus) (MTURN), mRNA [NM_152793]	chr7:30197152-30197211	hs|7p14.3	CAGCCAGCAGTAAATCTGGGGGCTCCCCTGAGAAGGAGAGTGAGCCCCACAGTAACCTAG
A_22_P00012047	lnc-PLEKHG6-1			8.06101	7.17533	9.79991	6.18664	5.82608	8.83704	4.75558	8.04835	61.2729	498.161	21.7499	265.277	P	P	P	P	0	lnc-PLEKHG6-1:1	AA577485	Hs.732532	lnc-PLEKHG6-1:1				nm91g12.s1 NCI_CGAP_Co9 Homo sapiens cDNA clone IMAGE:1075654 3' similar to gb:M63121 TUMOR NECROSIS FACTOR RECEPTOR 1 PRECURSOR (HUMAN);, mRNA sequence [AA577485]	chr12:6438042-6438101	hs|12p13.31	CTTGTCCAGGCAGAGGGCACAGGAGTGCCAAGTTTCTATTAGTGTAACATGATTGATTTA
A_22_P00012332	LOC101928812	101928812		-2.68192	5.58915	-5.26389	6.44789	6.3459	4.92263	7.75631	5.36019	89.1371	35.5756	170.362	40.5724	P	P	P	P	0	ENST00000524410			uncharacterized LOC101928812	ENST00000524410	THC2639118			chr11:45387604-45387663	hs|11p11.2	TCCTCAGTGCTGCCACACGTTTGCCCTGGGTCCTTGAGCAAATTGGCTCTTTTCTGTGGC
A_22_P00012456	LINC00176	284739	NR_027687	-5.40697	7.02495	1.54031	5.82171	8.34707	5.91225	5.51843	6.14165	374.176	71.1175	36.5067	70.249	P	P	P	P	0	NR_027687	NR_027687	Hs.97840	long intergenic non-protein coding RNA 176	ENST00000431158	NP1167793		Homo sapiens long intergenic non-protein coding RNA 176 (LINC00176), transcript variant 2, long non-coding RNA [NR_027687]	chr20:62669496-62669555	hs|20q13.33	ACTAGACCCGGGAGCTCGGGACGGCGGGGACGGCCTCGGGCCTCCTGTGGCGCCCAGAAG
A_22_P00012501	PAX8-AS1	654433	NR_015377	-1.45824	6.64376	-5.69993	6.62589	6.92144	6.37721	7.99926	5.48831	132.795	95.5464	201.771	44.2457	P	P	P	P	0	NR_015377	NR_015377	Hs.656660	PAX8 antisense RNA 1		THC2517951		Homo sapiens PAX8 antisense RNA 1 (PAX8-AS1), transcript variant 1, long non-coding RNA [NR_015377]	chr2:114017010-114017069	hs|2q13	TCAAGTTCTTCCCGCAGACACCTGGCTCCTTGAGGGGAGGTGCAGCTTTCATCTGACCAT
A_22_P00012561	LOC100506476	100506476	NR_109995	-1.37377	7.08932	-7.47331	7.93222	7.32209	6.86395	9.51469	6.61294	178.102	135.248	577.008	96.4742	P	P	P	P	0	NR_109995	NR_109995	Hs.287299	uncharacterized LOC100506476		THC2640786		Homo sapiens uncharacterized LOC100506476 (LOC100506476), long non-coding RNA [NR_109995]	chr14:74269680-74269739	hs|14q24.3	ATTCCAGAGCAGCTTTGGGTTCCTGTCAAGACCTGCTTTGAGAAGGAGGTGGCTGTGGGG
A_22_P00012736	ATP2A1-AS1	100289092	NR_046287	-6.45359	8.33736	-7.47961	8.25875	9.79021	7.1001	9.83681	6.93385	1089.3	157.178	729.849	120.933	P	P	P	P	0	NR_046287	NR_046287	Hs.666631	ATP2A1 antisense RNA 1		THC2633562		Homo sapiens ATP2A1 antisense RNA 1 (ATP2A1-AS1), transcript variant 1, long non-coding RNA [NR_046287]	chr16:28890337-28890278	hs|16p11.2	GAATCAGGCCACCTTGAGGTTCATCAAGTTCATCCCATTAAAACCTCCCAAAACTCTGGA
A_22_P00012840	MEF2C-AS1	101929423	NR_109940	-3.53465	5.40514	-5.41941	5.60825	6.39212	4.57055	6.95829	4.52015	91.9203	27.1857	98.6754	23.4333	P	P	P	P	0	NR_109940	NR_109940	Hs.130138	MEF2C antisense RNA 1		THC2773804		Homo sapiens MEF2C antisense RNA 1 (MEF2C-AS1), transcript variant 2, long non-coding RNA [NR_109940]	chr5:88185235-88185294	hs|5q14.3	AGCTGAAGGGGCGGGGGTTCCTTCCTTGGAGTGTTTCTAGAGCTCGGAGGCTGCTGGTAG
A_22_P00012842	lnc-RASA1-7			-4.47288	5.96175	-4.19398	7.00428	7.13949	4.97829	8.11437	6.04605	156.808	37.2099	218.891	65.3167	P	P	P	P	0	lnc-RASA1-7:7			lnc-RASA1-7:7		THC2693066		ALU1_HUMAN (P39188) Alu subfamily J sequence contamination warning entry, partial (13%) [THC2693066]	chr5:88390787-88390846	hs|5q14.3	CATCTGGAGGCCTGATTTATTGGAGATTGCAAATGTACAGTGTAACATAGCTGTGGAGAG
A_22_P00012859	LINC01317	104355287	NR_126403	-1.07982	6.59964	-4.31612	8.08646	6.65526	6.54448	9.20984	7.1001	110.115	107.607	466.484	136.067	P	P	P	P	0	NR_126403	NR_126403	Hs.636582	long intergenic non-protein coding RNA 1317	ENST00000442026			Homo sapiens long intergenic non-protein coding RNA 1317 (LINC01317), long non-coding RNA [NR_126403]	chr2:34080761-34080820	hs|2p22.3	ACATCTAGAAGACCCTCACCTTATGCTTATGCTGGCCCCTTGATCTTGGCCTCCAGAAAT
A_22_P00012869				4.3638	6.84236	1.35893	5.11511	5.86161	7.9872	4.89866	5.34113	62.9625	285.562	23.8648	40.0384	P	P	P	P	0	ENST00000562504	AF088044	Hs.586513		ENST00000562504	THC2657253		Homo sapiens full length insert cDNA clone ZD58F01. [AF088044]	chr1:206677637-206677696	hs|1q32.1	GAAAAAAGTCAATGGGTCTGAGCCAAGAGGATCTACTAACAAGGGGAAAGATCTCCCAGT
A_22_P00012883	lnc-RBM11-2			-4.44243	7.46622	-4.37076	7.33143	8.61898	6.46763	8.47218	6.34429	459.744	101.81	278.912	80.3408	P	P	P	P	0	lnc-RBM11-2:3	BC048201	Hs.558872	lnc-RBM11-2:3		THC2534276		Homo sapiens, clone IMAGE:3660074, mRNA. [BC048201]	chr21:15456387-15456446	hs|21q11.2	TTTGCTGCCATCTAACTCCGCTGACCGGCCCACCGTTCCTCCACTGTTCGCTGGTTGACC
A_22_P00012923	LOC102724601	102724601	NR_121197	-5.85829	7.70407	-4.23515	8.18901	9.08414	6.53367	9.29615	7.21374	647.282	106.619	496.219	148.376	P	P	P	M	0	NR_121197	NR_121197	Hs.737097	uncharacterized LOC102724601	ENST00000454467	THC2787465		Homo sapiens uncharacterized LOC102724601 (LOC102724601), long non-coding RNA [NR_121197]	chr1:174124824-174124765	hs|1q25.1	AAAGAGGCACTGGCTACTGGAGGAAGGGAGAAATCACCGAGAGAGCGAAAGATGTAACAG
A_22_P00012934	lnc-RCL1-1			-1.93348	6.40482	-5.66047	5.31077	6.89805	5.94685	6.70646	4.20554	130.593	72.4179	83.7084	19.2918	P	P	P	P	0	lnc-RCL1-1:1	AK021739	Hs.649976	lnc-RCL1-1:1				Homo sapiens cDNA FLJ11677 fis, clone HEMBA1004778. [AK021739]	chr9:4885425-4885484	hs|9p24.1	GTTCCCATTTGCCAGAGCTCATTTATTGTCCTGAAGGTCTGTGAAAAGATGACAAAGTCG
A_22_P00013104	lnc-RIMS3-2			-4.82243	5.78858	-14.2072	5.8868	7.03366	4.7639	8.1045	4.27595	145.314	31.9357	217.101	20.3222	P	P	P	P	0	lnc-RIMS3-2:1			lnc-RIMS3-2:1				LNCipedia lincRNA (lnc-RIMS3-2), lincRNA [lnc-RIMS3-2:1]	chr1:40981511-40981452	hs|1p34.2	CACTCATCCCTGAGCCTTGGTCCTGGACTGAATGTGGTTAGAGGTTGTGGAAATAAAAAA
A_22_P00013165	RNF125	54941	NM_017831	12.6975	8.5713	30.9415	8.05648	6.93192	10.5984	5.95256	10.904	133.925	1607.14	49.4291	1822.59	P	P	P	P	0	NM_017831	NM_017831	Hs.633703	ring finger protein 125, E3 ubiquitin protein ligase	ENST00000580863	THC2666944	GO:0004842(ubiquitin-protein ligase activity)|GO:0008270(zinc ion binding)|GO:0016567(protein ubiquitination)|GO:0016874(ligase activity)|GO:0032480(negative regulation of type I interferon production)|GO:0045087(innate immune response)	Homo sapiens ring finger protein 125, E3 ubiquitin protein ligase (RNF125), mRNA [NM_017831]	chr18:29625631-29625690	hs|18q12.1	AACTGTATGAAGACAGCTTGCTGGATCATTGTATTACTCATCACAGATCGGAACGGAGGC
A_22_P00013299	lnc-RP11-1105G2.3.1-4			3.95167	5.38	4.35132	5.77746	4.47932	6.46178	4.8133	6.93475	23.1264	101.411	22.6626	121.02	P	P	P	P	0	lnc-RP11-1105G2.3.1-4:1	AL832705	Hs.737548	lnc-RP11-1105G2.3.1-4:1		NP1162865		Homo sapiens mRNA; cDNA DKFZp313B1235 (from clone DKFZp313B1235). [AL832705]	chr12:94185766-94185707	hs|12q22	AACAAAAAGTTAAGTGAAAAAATTCAACCAGTCTGGGCCACCATACAGCCTTGTCTGGAA
A_22_P00013489	lnc-RP11-33N16.1.1-2			-5.86747	6.5449	-2.41001	6.38139	7.94456	5.39182	7.04738	5.77834	277.507	49.8368	104.826	53.9847	P	P	P	P	0	lnc-RP11-33N16.1.1-2:1			lnc-RP11-33N16.1.1-2:1				LNCipedia lincRNA (lnc-RP11-33N16.1.1-2), lincRNA [lnc-RP11-33N16.1.1-2:1]	chr14:89822856-89822915	hs|14q32.11	ACAATTGTAACCCTGTAAAGCTGATGAGATATTAAAACAAGACAAAAACTGAAAACGAAA
A_22_P00013494				-11.9433	7.2597	-20.3622	8.60428	9.26596	5.68784	11.0486	6.70074	741.568	61.1545	1663.08	102.308	P	P	P	P	0	ENST00000519032	DB028566	Hs.583772		ENST00000519032			DB028566 TESTI2 Homo sapiens cDNA clone TESTI2011495 5', mRNA sequence [DB028566]	chr8:47843029-47842970	hs|8q11.1	AAGAGCCACAGCCTCACTGAGCCCTGGAGCCCAGTTCAGAGCAGAGTTGCAGCTGCAGAG
A_22_P00013498	lnc-RP11-362K2.2.1-1			-2.1794	5.19368	-5.20089	5.82476	5.78596	4.66203	7.13434	4.75558	59.5901	29.5523	111.129	26.9103	P	P	P	P	0	lnc-RP11-362K2.2.1-1:1			lnc-RP11-362K2.2.1-1:1				LNCipedia lincRNA (lnc-RP11-362K2.2.1-1), lincRNA [lnc-RP11-362K2.2.1-1:1]	chr12:59315194-59315253	hs|12q14.1	AAGATGTTGAAACTAATGGAGACCGCAGAGATCATGTGCTAAGGGGCCTTCCTCCTCTGG
A_22_P00013508	LOC102725057	102725057	XR_424658	-14.8648	5.94445	-7.50571	6.29088	8.20207	4.30824	7.91071	5.00272	334.91	21.8105	190.324	31.97	P	P	P	P	0	XR_424658	XR_424658	Hs.667183	uncharacterized LOC102725057		THC2606507		PREDICTED: Homo sapiens uncharacterized LOC102725057 (LOC102725057), ncRNA [XR_424658]	chr15:83782428-83782369	hs|15q25.2	ATGCAGAGTGGCCCCAACCCACAGACCTGTGAGCAAGAAAAATAAATGTTTGTTGCTGTA
A_22_P00013583	LOC102723692	102723692	XR_429671	-17.3209	8.43939	3.73559	6.55815	10.7437	6.62929	5.67603	7.57736	2180.71	114.385	40.5959	190.107	P	P	P	P	0	XR_429671	XR_429671		uncharacterized LOC102723692		THC2622086		PREDICTED: Homo sapiens uncharacterized LOC102723692 (LOC102723692), ncRNA [XR_429671]	chr16:17232289-17232348	hs|16p12.3	ACTTGCAGCCCAGCTTGCGATTCCAGTTGGTGATGCGCAGGTTGTTGTCCACCATGGTGT
A_22_P00013803				-1.07629	5.53817	-4.15184	6.51471	5.59146	5.48539	7.62202	5.56827	51.713	53.1099	154.496	46.762	P	P	P	P	0	ENST00000608290				ENST00000608290	THC2648906		Q4S2P7_TETNG (Q4S2P7) Chromosome 17 SCAF14760, whole genome shotgun sequence, partial (3%) [THC2648906]	chr22:46411270-46411329	hs|22q13.31	GCTGAAACCTGCTGTGAGTGAAAAATGAGAAGCTGTTGTTTTAATTTTACTTTCTCTGAT
A_22_P00013817	lnc-RPA2-1			-1.24554	6.28261	-7.54414	6.12697	6.443	6.12622	7.75566	4.84031	95.5523	81.756	170.279	28.4052	P	P	P	P	0	lnc-RPA2-1:1			lnc-RPA2-1:1				LNCipedia lincRNA (lnc-RPA2-1), lincRNA [lnc-RPA2-1:1]	chr1:28357220-28357161	hs|1p35.3	CGCTTCTAATTCATGCTAGCGATGTCAGTATTCCTCAGTCTCTTAAAATAAGTTATTTCA
A_22_P00013884				-5.05904	6.94314	-2.08459	6.68889	8.21037	5.8715	7.23973	6.17996	337.17	69.0834	119.184	72.0743	P	P	P	P	0	ENST00000572349				ENST00000572349	THC2695816			chr17:45000237-45000178	hs|17q21.32	AGAGCAAAGTTGAAGGCGAGCCGCTATCATCTGCTGTTCTCTGCCGCAGAGAGGACTGGA
A_22_P00013946	lnc-RSL1D1-2			1.0742	4.54992	6.13358	5.68188	4.49858	4.60185	4.52221	7.13894	23.3668	27.8784	19.0472	139.921	P	P	P	P	0	lnc-RSL1D1-2:1	AF447869	Hs.689812	lnc-RSL1D1-2:1				Homo sapiens FP1523 mRNA, complete cds. [AF447869]	chr16:11975104-11975045	hs|16p13.13	CCTCCTGAATCTCAGTGGAACAGAGCTAGAATAGTTTAAAAGACATAGAGGCAGCTGGTG
A_22_P00014047	SAA3P	6290	NR_026576	-4.31749	5.41309	-1.89397	4.88954	6.57005	4.45986	5.37191	4.45049	104.231	24.8904	32.9063	22.3878	P	P	P	P	0	NR_026576		Hs.454496	serum amyloid A3 pseudogene	ENST00000534768	NP1072305		Homo sapiens serum amyloid A3 pseudogene (SAA3P), non-coding RNA [NR_026576]	chr11:18137673-18137614	hs|11p15.1	AAACAGAATGTGTATTATCCTTGGTTGTGTTTCCTTGGCCCTGCAGCAGGATGAAGCTCT
A_22_P00014065	LINC01429	101927678	NR_110016	-4.79545	7.83905	-10.5791	8.27447	9.05103	6.78936	10.1492	6.74604	633.902	128.328	907.278	106.221	P	P	P	P	0	NR_110016		Hs.683840	long intergenic non-protein coding RNA 1429	ENST00000438154	THC2633484		Homo sapiens long intergenic non-protein coding RNA 1429 (LINC01429), long non-coding RNA [NR_110016]	chr20:50459283-50459224	hs|20q13.2	AACATCTTTTGAAGAGCTCAGACCCTGGACCCCTGATCTTAATGAGCTTTGCAGCCTTCA
A_22_P00014089	SARM1	23098		5.28868	5.60023	1.32699	5.23131	4.52621	6.92911	5.03121	5.43936	23.9087	141.19	25.7749	42.8571	P	P	P	P	0	ENST00000585482	AK026824	Hs.612921	sterile alpha and TIR motif containing 1	ENST00000585482		GO:0002224(toll-like receptor signaling pathway)|GO:0002756(MyD88-independent toll-like receptor signaling pathway)|GO:0005737(cytoplasm)|GO:0005739(mitochondrion)|GO:0005829(cytosol)|GO:0005874(microtubule)|GO:0009749(response to glucose stimulus)|GO:0030054(cell junction)|GO:0030424(axon)|GO:0030425(dendrite)|GO:0031315(extrinsic to mitochondrial outer membrane)|GO:0034138(toll-like receptor 3 …	sterile alpha and TIR motif containing 1 [Source:HGNC Symbol;Acc:HGNC:17074] [ENST00000585482]	chr17:26730639-26730698	hs|17q11.2	CAGACAAGCAGTTGAGTTAAGAAATCTGTGATTATTGTATTGTTGACTATACACAGCACA
A_22_P00014096	lnc-SASS6-2			-1.23467	5.67715	-4.79963	5.50766	5.83125	5.52712	6.75414	4.49122	61.4957	54.7422	86.1484	22.9858	P	P	P	P	0	lnc-SASS6-2:1	BC048339	Hs.534953	lnc-SASS6-2:1		THC2559399		Homo sapiens cDNA clone IMAGE:5211580, partial cds. [BC048339]	chr1:100434923-100434864	hs|1p21.2	TTACCTTTTAAAAGTGTTCCAGTAGCTGTGTTGGAAACCCTCTAACCACGGCAGCCCATT
A_22_P00014120	lnc-SCAP-1			-2.19357	7.20594	-4.4848	6.55506	7.79483	6.66155	7.72637	5.56132	248.833	117.324	166.605	46.4827	P	P	P	P	0	lnc-SCAP-1:1	BC036224	Hs.613098	lnc-SCAP-1:1		THC2685070		Homo sapiens cDNA clone IMAGE:5272313. [BC036224]	chr3:47420734-47420675	hs|3p21.31	AGTCAAGGGCCTAGCTTCATTCCAGTTGGAGTTAGAGCAGAAGAAAATGAAATTACATGA
A_22_P00014383	ANKRD44-IT1	101927547	NR_046837	5.59201	5.60119	2.23827	5.99829	4.49549	6.97885	5.44519	6.60758	23.3477	145.255	34.7364	96.1508	P	P	P	P	0	NR_046837	NR_046837	Hs.687027	ANKRD44 intronic transcript 1 (non-protein coding)		THC2676360		Homo sapiens ANKRD44 intronic transcript 1 (non-protein coding) (ANKRD44-IT1), long non-coding RNA [NR_046837]	chr2:198115641-198115582	hs|2q33.1	AACTAACTTACCATCCTTTAACTAACTTACCACCCAAAATGAATTCTGTAGCCTTTGTCA
A_22_P00014426	lnc-SGSH-1			5.01601	6.43081	1.16271	7.49635	5.37191	7.69845	7.38839	7.60588	44.4335	234.927	131.421	194.71	P	P	P	M	0	lnc-SGSH-1:1	AL833696	Hs.550529	lnc-SGSH-1:1		THC2492847		LNCipedia lincRNA (lnc-SGSH-1), lincRNA [lnc-SGSH-1:1]	chr17:78177691-78177632	hs|17q25.3	GCCTCACCTTGCGGGTCACGGTGCACTGCTGAGTCATGTCCTGGATGAGGGCTATGAGCT
A_22_P00014730	lnc-SLC2A4RG-1			5.62401	5.50645	2.89775	5.22121	4.39982	6.89142	4.50985	6.04478	21.8796	137.563	18.9457	65.17	P	P	P	P	0	lnc-SLC2A4RG-1:2			lnc-SLC2A4RG-1:2		THC2780915		Q9VRI3_DROME (Q9VRI3) CG10918-PA, partial (8%) [THC2780915]	chr20:62376960-62377019	hs|20q13.33	ATCTGAAGGCACAGCACCGCAGTGGTGGCCTGTGCCAGAGGAGGGGGTGAAGGATGGAAT
A_22_P00014812				2.89345	11.2775	7.20664	10.6425	10.5371	12.0699	9.31281	12.1621	1880.11	4280.63	503.065	4327.3	P	P	P	P	0	ENST00000443037				ENST00000443037	THC2769926		SOX9 antisense RNA 1 [Source:HGNC Symbol;Acc:HGNC:49321] [ENST00000443037]	chr17:70106835-70106776	hs|17q24.3	TAATTCCATCACTAATACACATTCCTTGCTGCTGCTTCCTGCTTTCGCTTTTGAAGTGCC
A_22_P00014901	LOC100506023	100506023	NR_037845	4.73994	7.54246	3.3854	7.63848	6.50308	8.74795	6.8093	8.56863	99.5961	468.199	89.3766	376.199	P	P	P	P	0	NR_037845		Hs.731284	uncharacterized LOC100506023		THC2664184		Homo sapiens uncharacterized LOC100506023 (LOC100506023), long non-coding RNA [NR_037845]	chr1:173445830-173445771	hs|1q25.1	TGTCAGAGGAAGTGGCTTTCTTATTGCAGCAAAAATTCCCGTACCAATGTCAGTGCTAGG
A_22_P00014914	SLCO5A1	81796		-32.7065	6.64278	-66.6219	7.2587	9.61896	4.58745	10.8943	4.83637	957.45	27.6336	1502.21	28.3519	P	P	P	P	0	ENST00000260126	AK022971	Hs.152460	solute carrier organic anion transporter family, member 5A1	ENST00000260126	THC2661715	GO:0005215(transporter activity)|GO:0005886(plasma membrane)|GO:0006810(transport)|GO:0016021(integral to membrane)	solute carrier organic anion transporter family, member 5A1 [Source:HGNC Symbol;Acc:HGNC:19046] [ENST00000260126]	chr8:70579397-70579338	hs|8q13.3	CGTGTGTTTAATGAAATCTGTTGTCGATGTACTAATCTTGGTTTACAGCATCTTGAATAC
A_22_P00015002				-1.17442	5.02932	-10.6617	7.13347	5.14663	4.91468	9.04209	5.62772	38.3102	35.3272	414.217	48.7535	P	P	P	P	0	ENST00000607952				ENST00000607952	THC2769118		Q742L2_MYCPA (Q742L2) SerC, partial (7%) [THC2769118]	chr10:112255936-112255877	hs|10q25.2	AAACTGCTTGGGGTAAAGAAAACAAAAAACGCAACCCCCCCAGCATGGTGCGTACTGGAG
A_22_P00015063	lnc-SNRPD3-2			-2.93336	6.35119	-6.0398	6.78405	7.17473	5.62218	8.20422	5.60972	160.518	58.4352	233.357	48.233	P	P	P	P	0	lnc-SNRPD3-2:1			lnc-SNRPD3-2:1				LNCipedia lincRNA (lnc-SNRPD3-2), lincRNA [lnc-SNRPD3-2:1]	chr22:24914294-24914353	hs|22q11.23	AAAGTGATGAAAGCCTGTGAGCAAGAAAAAGACGTGTTCAGGCTGTGGTCAGAACTCTTG
A_22_P00015282	NBPF1	55672	NM_017940	5.72637	6.2424	3.37025	5.9549	5.10924	7.62686	5.14263	6.89548	37.2455	224.257	27.8441	117.953	P	P	P	P	0	NM_017940	NM_017940	Hs.467587	neuroblastoma breakpoint family, member 1	ENST00000599069	THC2492098	GO:0005737(cytoplasm)	Homo sapiens neuroblastoma breakpoint family, member 1 (NBPF1), mRNA [NM_017940]	chr1:16939892-16939833	hs|1p36.13	CGCGGCTGCCGGCTGCCCTGTGAATGGGAAGTTACGCGAAGTCCACCCAGCGTTTCTGAG
A_22_P00015308	LAT	27040	NM_014387	24.1891	9.63192	31.0102	8.76561	7.60415	12.2004	6.63162	11.5863	218.906	4685.98	79.4578	2928.8	P	P	P	P	0	NM_014387	NM_014387	Hs.632179	linker for activation of T cells	ENST00000562701	THC2544896	GO:0001772(immunological synapse)|GO:0002260(lymphocyte homeostasis)|GO:0005070(SH3/SH2 adaptor activity)|GO:0005515(protein binding)|GO:0005886(plasma membrane)|GO:0005911(cell-cell junction)|GO:0006954(inflammatory response)|GO:0006955(immune response)|GO:0007229(integrin-mediated signaling pathway)|GO:0007265(Ras protein signal transduction)|GO:0007596(blood coagulation)|GO:0008180(signalosome…	Homo sapiens linker for activation of T cells (LAT), transcript variant 1, mRNA [NM_014387]	chr16:29001101-29001160	hs|16p11.2	GCCGGGAGTATGTGAATGTGTCCCAGGAACTGCATCCTGGAGCGGCTAAGACTGAGCCTG
A_22_P00015329	lnc-SPPL3.1-3			-3.02524	7.66627	-6.43897	6.93628	8.50627	6.90922	8.4086	5.72177	419.999	139.508	266.635	52.0008	P	P	P	P	0	lnc-SPPL3.1-3:1			lnc-SPPL3.1-3:1				LNCipedia lincRNA (lnc-SPPL3.1-3), lincRNA [lnc-SPPL3.1-3:1]	chr12:121137208-121137149	hs|12q24.31	AAGAAGTTTCACCCTGACTGTCCTTGTTTTCAGTCAGCTGGGCTCAGTGGGATCTAAAAA
A_22_P00015402	KMT2E-AS1	100216545	NR_024586	6.81917	6.94142	7.58743	5.90004	5.69341	8.46301	4.61662	7.54024	55.7578	391.198	20.0322	185.505	P	P	P	P	0	NR_024586	NR_024586	Hs.631150	KMT2E antisense RNA 1 (head to head)				Homo sapiens KMT2E antisense RNA 1 (head to head) (KMT2E-AS1), long non-coding RNA [NR_024586]	chr7:104653444-104653385	hs|7q22.3	ACCCAAGCAGTGGCGAAGGGAATCGCAAGGCTCTTCCCTGACCATTTTCTACTGTCCCTG
A_22_P00015497	TRG-AS1	100506776	NR_040085	7.29518	10.7816	7.50855	9.84572	9.44299	12.3099	8.49827	11.4068	843.591	5042.23	285.041	2595.4	P	P	P	P	0	NR_040085	NR_040085	Hs.173034	T cell receptor gamma locus antisense RNA 1		THC2557408		Homo sapiens T cell receptor gamma locus antisense RNA 1 (TRG-AS1), long non-coding RNA [NR_040085]	chr7:38381341-38381400	hs|7p14.1	GTTCTTTATTAAAAGGACTGAGGATCATGTGTGTTGGTGGGCCTTGGACTCTGCTCTAAG
A_22_P00015662	SBF2-AS1	283104	NR_036485	-8.57011	6.16444	-3.37019	5.67793	7.9059	4.80658	6.62159	4.86876	270.161	32.9305	79.0614	28.9265	P	P	P	P	0	NR_036485	NR_036485	Hs.734067	SBF2 antisense RNA 1		THC2619571		Homo sapiens SBF2 antisense RNA 1 (SBF2-AS1), long non-coding RNA [NR_036485]	chr11:9829833-9829892	hs|11p15.4	TTACCTGGACAGCAAATTTGTTCACTAACCATTCCAGGATGGCCAATAAAATTAATTTTG
A_22_P00015773	LOC100996579	100996579	NR_110163	-3.75583	6.37285	-5.99408	7.3835	7.39851	5.48937	8.78741	6.20388	188.814	53.2936	347.372	73.1884	P	P	P	P	0	NR_110163	NR_110163	Hs.660929	uncharacterized LOC100996579	ENST00000436506	THC2621990		Homo sapiens uncharacterized LOC100996579 (LOC100996579), transcript variant 1, long non-coding RNA [NR_110163]	chr2:162103767-162103826	hs|2q24.2	TACTCTGTTGCCCTATTATAGTCCTGCGATAGTTCTGGCTAGGATTAGGTTGACGGTCTA
A_22_P00015795	lnc-TARDBP-2			-3.84547	5.52895	-6.85351	6.45711	6.58525	4.64209	7.99311	5.21627	105.294	29.0295	200.857	36.6853	P	P	P	P	0	lnc-TARDBP-2:1	BE669601	Hs.634965	lnc-TARDBP-2:1		THC2550501		7e15h01.x1 NCI_CGAP_Lu24 Homo sapiens cDNA clone IMAGE:3282577 3' similar to gb:L01457 AUTOANTIGEN PM-SCL (HUMAN);, mRNA sequence [BE669601]	chr1:11162049-11162108	hs|1p36.22	AGGCAGCTCAAGAGATAGATTCACTCTCCTGAAATTAGAGATGGGATGCCCTTAATACAA
A_22_P00015940	ENTPD1-AS1	728558	NR_038444	1.5166	7.50448	4.05297	6.65616	7.21007	7.81091	5.72279	7.74177	164.523	253.965	41.9115	213.453	P	P	P	P	0	NR_038444	NR_038444	Hs.538374	ENTPD1 antisense RNA 1		THC2592457		Homo sapiens ENTPD1 antisense RNA 1 (ENTPD1-AS1), long non-coding RNA [NR_038444]	chr10:97849798-97849739	hs|10q24.1	GCCGCGCTTCCCGTTAACTTGCCGCTAAGTTTTTCTAGAAAAGTCGCCCTTCTTGCCAGG
A_22_P00016058	LOC100506047	100506047	XR_109976	5.41988	6.39362	3.5763	6.55668	5.28968	7.72794	5.70158	7.54004	42.1289	240.34	41.303	185.45	P	P	P	M	0	ENST00000434020	XR_109976	Hs.127112	uncharacterized LOC100506047	ENST00000434020	THC2622442		PREDICTED: Homo sapiens uncharacterized LOC100506047 (LOC100506047), ncRNA [XR_109976]	chr2:43325024-43324965	hs|2p21	AGAAGGGCCCCCGAGAGCTGGCACAGTGCATGTGTTTCCTCTCCAGACTTCTACAAACCT
A_22_P00016134				4.26221	8.23335	3.23198	7.92883	7.25371	9.34531	7.12765	8.82006	169.69	704.647	110.592	446.005	P	P	P	P	0	ENST00000478301				ENST00000478301	THC2547750		ZBTB20 antisense RNA 2 [Source:HGNC Symbol;Acc:HGNC:42421] [ENST00000478301]	chr3:114406377-114406436	hs|3q13.31	CAGGGCCCTTAACAATCCATAGGGAGATTTACTTGCTTAAGGAAAATAAATAGGTAAATA
A_22_P00016138	lnc-TIMM13-1			-3.3095	7.08085	-4.06018	7.80853	7.99658	6.26997	8.88445	6.8629	287.783	89.5967	368.837	115.195	P	P	P	P	0	lnc-TIMM13-1:1	AK130337	Hs.688346	lnc-TIMM13-1:1		NP1157525		Homo sapiens cDNA FLJ26827 fis, clone PRS06777. [AK130337]	chr19:2610818-2610759	hs|19p13.3	TGGTTCAAACCTCTTCTGAAACCTGTCAGCATCTTGCAACAATAAAAGAGGGTCTCTTGT
A_22_P00016228	lnc-TM9SF2-2			5.48923	8.661	4.51189	9.30619	7.51937	9.97597	8.28258	10.4563	205.702	1057.92	244.625	1340.93	P	P	P	P	0	lnc-TM9SF2-2:1			lnc-TM9SF2-2:1				LNCipedia lincRNA (lnc-TM9SF2-2), lincRNA [lnc-TM9SF2-2:1]	chr13:99971132-99971191	hs|13q32.3	GTTTGTGCTTTCAAGGTAATTTTGATGAAAGTTTTAGCTGGGCTTGTCAGTGTTGTTTTT
A_22_P00016230	CATIP-AS1	101928513	NR_110573	4.41904	7.28953	1.21298	9.06901	6.29604	8.43978	8.9308	9.20935	85.7775	385.545	381.947	576.588	P	P	P	P	0	NR_110573	NR_110573	Hs.512386	CATIP antisense RNA 1		THC2648769		Homo sapiens CATIP antisense RNA 1 (CATIP-AS1), long non-coding RNA [NR_110573]	chr2:219231709-219231650	hs|2q35	CCAGACCGCCTGCTATGGACTGAATTGTCTCTCTAACCCCCAGTGTGGTGGTATTTGGAG
A_22_P00016235	SNORD57	26792	NR_002738	4.91999	11.65	5.4528	11.8336	10.5572	12.8559	10.6732	13.1202	1909.49	7279.92	1297.32	8285.12	P	P	P	P	0	NR_002738	NR_002738		small nucleolar RNA, C/D box 57	ENST00000471023	THC2535333		Homo sapiens small nucleolar RNA, C/D box 57 (SNORD57), small nucleolar RNA [NR_002738]	chr20:2637597-2637656	hs|20p13	ACTGTCTGAGCCTGACCTTGTAGAATGGAGGCAAAAAAACTGATTTAATGAGCCTGATCC
A_22_P00016248	lnc-TMCO3-1			-3.62056	8.93227	-4.23856	8.91642	9.90846	8.05225	10.0189	7.93528	1192.27	297.682	827.9	244.397	P	P	P	P	0	lnc-TMCO3-1:1			lnc-TMCO3-1:1		THC2722837		LNCipedia lincRNA (lnc-TMCO3-1), lincRNA [lnc-TMCO3-1:1]	chr13:114130232-114130291	hs|13q34	GCCCCACCGCCTACTGGAGCCGTCCTTCACCGTGCCTCTAGCTGGATGTAATCAGGAACT
A_22_P00016430				-8.94072	8.93752	-11.3698	9.57067	10.6563	7.49594	11.4836	7.97642	2056.32	205.215	2245.03	251.683	P	P	P	P	0	ENST00000554254				ENST00000554254	THC2667238		HIF1A antisense RNA 2 [Source:HGNC Symbol;Acc:HGNC:43015] [ENST00000554254]	chr14:62217662-62217603	hs|14q23.2	TTCAATAGTACACGGAGATCGGGTGTCTGGGCAGCGTCTTGGAAAAACTATCCACTACAG
A_22_P00016450	lnc-TMEM63A-1			9.7529	10.4335	3.70595	10.9172	8.91912	12.2049	10.0131	11.9029	574.91	4699.63	824.875	3635.57	P	P	P	P	0	lnc-TMEM63A-1:1			lnc-TMEM63A-1:1		THC2541010		BC019442 transmembrane protein 63a {Mus musculus} (exp=-1; wgp=0; cg=0), partial (16%) [THC2541010]	chr1:226028816-226028757	hs|1q42.12	GGCATCTGGAGTGTTGGGGCCATGTTGGTGATATGGACGTACTTCACTTGTGAAAATTCT
A_22_P00016479	lnc-TMEM86A-2			-6.78508	7.85935	-5.36554	8.12531	9.36097	6.59861	9.42705	7.00332	792.343	111.861	543.694	127.127	P	P	P	P	0	lnc-TMEM86A-2:5	AL137366	Hs.585529	lnc-TMEM86A-2:5		THC2554657		Homo sapiens mRNA; cDNA DKFZp434F1626 (from clone DKFZp434F1626). [AL137366]	chr11:18625381-18625440	hs|11p15.1	CCAGCTGTACAGTTCCTGTTGTTGGTTTCACATAAAGTAATTGCACATTATTTTGTCATA
A_22_P00016518	PLAC4	191585	NM_182832	-1.70316	8.02222	-4.89585	8.76734	8.41552	7.64731	9.98767	7.69612	393.346	226.703	811.747	207.532	P	P	P	P	0	NM_182832	NM_182832	Hs.472492	placenta-specific 4		THC2464722		Homo sapiens placenta-specific 4 (PLAC4), mRNA [NM_182832]	chr21:42551409-42551350	hs|21q22.2	GACACCTCACTCTGCACCCTGGACACCCTCACTCACCCTGGACACGTTCACTCACCCTGA
A_22_P00016533	LOC101926967	101926967	XR_243706	6.01317	8.4383	2.24977	9.68764	7.24288	9.83101	9.12039	10.2902	168.596	962.363	438.303	1198.92	P	P	P	P	0	XR_243706	XR_243706		uncharacterized LOC101926967				PREDICTED: Homo sapiens uncharacterized LOC101926967 (LOC101926967), transcript variant X2, ncRNA [XR_243706]	chr17:42301019-42301075	hs|17q21.31	CCAAGGGGCTTTTCGGTAAAGTGCTTTGGAATAAAACAGGATGAACATGAATCATAAGAA
A_22_P00016664	lnc-TPCN2-5			-5.32952	5.71258	-1.93853	5.47344	7.04571	4.6317	5.97171	5.01675	146.893	28.7086	49.9744	32.2363	P	P	P	P	0	lnc-TPCN2-5:1	AK124882	Hs.131851	lnc-TPCN2-5:1		THC2608424		DA379985 BRTHA2 Homo sapiens cDNA clone BRTHA2013018 5', mRNA sequence [DA379985]	chr11:68927132-68927191	hs|11q13.3	TATCAGCCAGAGGCCAGCAGAACTCTATGGTCACTCCCCCGTGTCACGGACAATTTGCCA
A_22_P00016692				10.4735	7.45703	5.96264	8.79819	5.95276	9.34143	7.60398	10.1799	67.1872	703.252	152.361	1118.02	P	P	P	M	0	ENST00000564772	AK093872	Hs.167167		ENST00000564772	THC2557975		Homo sapiens cDNA FLJ36553 fis, clone TRACH2008478. [AK093872]	chr22:26918358-26918299	hs|22q12.1	GCAGCATGCATCATTCATTCTGATTCCTTAATTTGCCATATGTGAAAACATGGTAATCTA
A_22_P00016700				-3.46539	6.9678	-6.15022	6.31814	7.92174	6.12873	7.7629	5.14226	273.088	81.8672	171.102	34.8867	P	P	P	P	0	ENST00000423222	BC071808	Hs.550012		ENST00000423222	THC2728346		long intergenic non-protein coding RNA 467 [Source:HGNC Symbol;Acc:HGNC:28227] [ENST00000423222]	chr1:211608578-211608637	hs|1q32.3	GTGACATTTCTGAAATGTACCAGCAGAGGATACAGGGATTTTTGTTTGTTTTTCATTTTC
A_22_P00016779	lnc-TRIM41-3			-1.33288	7.32505	-4.27553	7.94572	7.53525	7.12071	9.0626	6.96649	208.011	159.345	419.65	123.733	P	P	P	P	0	lnc-TRIM41-3:2			lnc-TRIM41-3:2				LNCipedia lincRNA (lnc-TRIM41-3), lincRNA [lnc-TRIM41-3:2]	chr5:180619080-180619139	hs|5q35.3	AGCACGTTTTGCGTCTTGCTGTGCGTGAGGAAGCGGGGATCCAGGTCAAGGCTATGGAAA
A_22_P00016850	LOC283710	283710	NM_001243538	-38.3364	7.05968	-33.9888	7.00079	10.1641	4.90344	9.99201	4.90503	1432.32	35.1239	813.799	29.8662	P	P	P	P	0	NM_001243538	NM_001243538	Hs.591097	uncharacterized LOC283710	ENST00000558109	THC2678273		Homo sapiens uncharacterized LOC283710 (LOC283710), mRNA [NM_001243538]	chr15:31515512-31515453	hs|15q13.3	TGACAACAGCAGACGACAGGCCGCACTGATCCCACCTGGCTTACAGGTGCTGTCACACAG
A_22_P00016861	LRRC75A-AS1	125144	NR_045024	-2.35896	11.3928	-4.92331	11.7282	12.0286	10.7905	12.9343	10.6346	5551.91	1848.33	6361.94	1512.92	P	P	P	P	0	NR_045024	NR_045024	Hs.368934	LRRC75A antisense RNA 1	ENST00000483588	THC2516223	GO:0005739(mitochondrion)	Homo sapiens LRRC75A antisense RNA 1 (LRRC75A-AS1), transcript variant 27, long non-coding RNA [NR_045024]	chr17:16342669-16342728	hs|17p11.2	CGAAGGCCGGGACCCGGTTCCCCGGCCCACAGTGGGGGTGTGCAAACCCGAGAGAACTGG
A_22_P00016935	TSPAN33	340348	NM_178562	-6.1413	9.96817	-3.0969	10.9782	11.3631	8.74452	11.8238	10.193	3424.8	467.413	2866.72	1127.57	P	P	P	P	0	NM_178562	NM_178562	Hs.27267	tetraspanin 33	ENST00000498745	THC2676024	GO:0005886(plasma membrane)|GO:0009986(cell surface)|GO:0016021(integral to membrane)|GO:0019899(enzyme binding)|GO:0051604(protein maturation)|GO:0090002(establishment of protein localization in plasma membrane)|GO:0097197(tetraspanin-enriched microdomain)	Homo sapiens tetraspanin 33 (TSPAN33), mRNA [NM_178562]	chr7:128808088-128808147	hs|7q32.1	ATACTTAGATCCTAACGTGCCAGTGAGACCTGGCTGTGGAGAGTAGCACTGGCAGCCCTG
A_22_P00017166	LINC01397	104355139	NR_126382	5.83317	6.15371	2.16885	5.92047	5.01169	7.55597	5.38828	6.50521	34.4797	213.497	33.3394	89.9534	P	P	P	P	0	NR_126382		Hs.628193	long intergenic non-protein coding RNA 1397		THC2634494		Homo sapiens long intergenic non-protein coding RNA 1397 (LINC01397), long non-coding RNA [NR_126382]	chr1:110651490-110651549	hs|1p13.3	AATCCTGTCCATCTGATGGTTTGTCCACCACTGAGTCCTCCCCTCTAGAGGCTGGGAGTG
A_22_P00017203	lnc-UCK1-1			6.13044	5.92313	1.99181	6.53359	4.75784	7.37383	6.05543	7.04951	28.619	189.375	52.9296	130.722	P	P	P	P	0	lnc-UCK1-1:1			lnc-UCK1-1:1		THC2669894		LNCipedia lincRNA (lnc-UCK1-1), lincRNA [lnc-UCK1-1:1]	chr9:134392005-134391946	hs|9q34.13	GCATCGGTTCCCTGTGAAAACATCTGTGACTTTATGTACGAATAAAACTTATGTAACTTT
A_22_P00017211	lnc-UEVLD-2			2.20412	6.37298	4.07999	6.83448	5.82833	6.96854	5.89505	7.92361	61.3671	144.491	47.4136	242.568	P	P	P	P	0	lnc-UEVLD-2:1			lnc-UEVLD-2:1				LNCipedia lincRNA (lnc-UEVLD-2), lincRNA [lnc-UEVLD-2:1]	chr11:18530090-18530031	hs|11p15.1	ACTCTAGTGCCCAAGAGTAGAGTATCTTGCTTAAGTTTGAAATACGAAATATTTGGCCGG
A_22_P00017385	lnc-VAMP1-1			-2.40572	6.67338	-5.11302	6.18225	7.33659	6.07012	7.4704	5.11623	180.229	78.7707	139.352	34.297	P	P	P	P	0	lnc-VAMP1-1:7	CU680245	Hs.655224	lnc-VAMP1-1:7		THC2533132		LNCipedia lincRNA (lnc-VAMP1-1), lincRNA [lnc-VAMP1-1:7]	chr12:6560121-6560062	hs|12p13.31	AACATTCCAGAGAAGATCACAAGGATGCGAATAAAATCGGAGCTGCACAGGGATCTTTGG
A_22_P00017580	lnc-WDR67-2			2.71132	8.2342	7.16464	9.84478	7.54608	8.98507	8.52628	11.3672	209.63	547.007	290.828	2528.31	P	P	P	P	0	lnc-WDR67-2:1			lnc-WDR67-2:1		THC2600088		LNCipedia lincRNA (lnc-WDR67-2), lincRNA [lnc-WDR67-2:1]	chr8:123821401-123821460	hs|8q24.13	TGTCTGCAGTGGCTGGAGAAGGACAAACCTGAAGACACTAGAAAGAGGAGTTGGGTCCAG
A_22_P00017735	lnc-XXbac-B461K10.4.1-2			-2.78942	5.79651	-8.49894	5.75974	6.58354	5.10357	7.50665	4.41937	105.151	40.9202	143.288	22.1385	P	P	P	P	0	lnc-XXbac-B461K10.4.1-2:1	AK000085	Hs.610959	lnc-XXbac-B461K10.4.1-2:1				Homo sapiens cDNA FLJ20078 fis, clone COL02974. [AK000085]	chr22:18560357-18560298	hs|22q11.21	AATTGATTCACACTTTCTCCGCGTTGCCTCCGGAGTTTGCTGTAGGGTAATGAATATTGC
A_22_P00017772	lnc-YWHAZ-1			1.01628	5.31878	4.27637	5.47648	5.30714	5.33044	4.5277	6.62409	42.5937	47.6305	19.1047	97.2648	P	P	P	P	0	lnc-YWHAZ-1:1	AF086429	Hs.58429	lnc-YWHAZ-1:1		THC2637805		Homo sapiens full length insert cDNA clone ZD79H01. [AF086429]	chr8:101925579-101925520	hs|8q22.3	GGGCCTTTAAAGCAAAACACTAACCATGAAGAGTTTTACTTTTCCCAGGAAATGAAATAT
A_22_P00017827	lnc-ZC3H12D-2			-13.4505	7.58692	-13.529	8.97452	9.68992	5.94033	11.0481	7.29012	1012.91	72.2069	1662.8	156.545	P	P	P	P	0	lnc-ZC3H12D-2:1	BG211832	Hs.659484	lnc-ZC3H12D-2:1		THC2691069		RST31404 Athersys RAGE Library Homo sapiens cDNA, mRNA sequence [BG211832]	chr6:149348895-149348836	hs|6q25.1	AGAGAGAGGGATGGAAATTGTGACCAGAGAGTTGGAGTTGGGACCCCTGTCTTGATCACT
A_22_P00017841	MATN1-AS1	100129196	NR_034182	2.3373	7.43665	5.11605	7.43288	6.8494	8.07424	6.34805	8.70308	126.04	303.322	65.2849	410.193	P	P	P	P	0	NR_034182	NR_034182	Hs.659751	MATN1 antisense RNA 1		THC2477814		Homo sapiens MATN1 antisense RNA 1 (MATN1-AS1), long non-coding RNA [NR_034182]	chr1:31198839-31198898	hs|1p35.2	CAGGCGCCTTCTCTGTGTCACTTCTCCGCTCATTAGCAGAGCTGCAGAAATACACTACAG
A_22_P00017851	lnc-ZCCHC7-3			-2.8285	6.82527	-8.43282	7.81532	7.61637	6.11634	9.50322	6.42721	220.213	81.2242	572.31	85.3228	P	P	P	P	0	lnc-ZCCHC7-3:1	BM918748	Hs.571620	lnc-ZCCHC7-3:1		THC2655536		AGENCOURT_6635167 NIH_MGC_120 Homo sapiens cDNA clone IMAGE:5747798 5', mRNA sequence [BM918748]	chr9:37002782-37002841	hs|9p13.2	AGAAAGACGGGCGGTCAGGGCCGCAGAGGGCTGAGGGCGGCGGACCGGCTGTCACCGCAC
A_22_P00017888	lnc-ZFAT-3			-4.17592	7.56023	-1.24436	7.8182	8.66126	6.59916	7.97749	7.66209	475.639	111.925	198.866	201.769	P	P	P	P	0	lnc-ZFAT-3:1			lnc-ZFAT-3:1		THC2741836		LNCipedia lincRNA (lnc-ZFAT-3), lincRNA [lnc-ZFAT-3:1]	chr8:136468780-136468721	hs|8q24.23	CTCAAGTCCCGGCCTCAATGTCACCTTCCCTGGACAGCCTCTCAGGACCTCCCTGGCAAA
A_22_P00017995	LOC153684	153684	NR_015447	5.98419	8.92514	2.18955	9.31863	7.72739	10.3085	8.77045	9.90108	237.714	1319.82	343.722	914.584	P	P	P	P	0	NR_015447	NR_015447	Hs.259625	uncharacterized LOC153684		NP1460170		Homo sapiens uncharacterized LOC153684 (LOC153684), long non-coding RNA [NR_015447]	chr5:43044929-43044988	hs|5p12	CCTTGATCTGTGAAATGGATCACTGACGCTTTCTCTGTCTTTCCGGAAATGCAAAACAGG
A_22_P00017996	lnc-ZNF131-2			9.94373	8.04093	9.09502	8.00055	6.55297	9.86675	6.56497	9.75005	102.993	985.294	75.8508	824.478	P	P	P	M	0	lnc-ZNF131-2:2			lnc-ZNF131-2:2		THC2534181		ALU2_HUMAN (P39189) Alu subfamily SB sequence contamination warning entry, partial (11%) [THC2534181]	chr5:43018615-43018674	hs|5p12	TGCCTGTATTTTCTCGGTGCCTACAGCGCCCAGGTCGCCGATCTGAGGGCTTCGGAGTAC
A_22_P00017997	lnc-ZNF131-3			6.23302	6.67375	4.08161	6.87775	5.48307	8.123	5.93761	7.96675	48.0305	312.692	48.7847	249.923	P	P	P	P	0	lnc-ZNF131-3:1			lnc-ZNF131-3:1				LNCipedia lincRNA (lnc-ZNF131-3), lincRNA [lnc-ZNF131-3:1]	chr5:42995277-42995336	hs|5p12	ATTTCCCGGACACAGATGGTTTTTGGCCCCTGAAGAACTCTTTAATCCCTGCGTTTTGTA
A_22_P00018073	lnc-ZNF33A-2			5.07646	7.54453	1.75233	7.72771	6.4631	8.80692	7.33366	8.14293	96.8264	489.882	126.588	282.478	P	P	P	P	0	lnc-ZNF33A-2:1			lnc-ZNF33A-2:1				LNCipedia lincRNA (lnc-ZNF33A-2), lincRNA [lnc-ZNF33A-2:1]	chr10:38147401-38147460	hs|10p11.1	CTGTTAGACACAAGCCAAGAGAAGGAAAGGTGTGCTTGAATTCATTCACGATCATGCATG
A_22_P00018310	lnc-ZNF843-2			-1.73612	6.4265	-4.19847	6.14016	6.83674	6.04088	7.2617	5.19184	124.778	77.293	121.075	36.0295	P	P	P	P	0	lnc-ZNF843-2:1	AK125571	Hs.729588	lnc-ZNF843-2:1		THC2524453		Homo sapiens cDNA FLJ43583 fis, clone SKNMC2006173. [AK125571]	chr16:31468351-31468292	hs|16p11.2	TGTGTGAGCCCTTCAAAAGTCCTCTCAGCACGTGAGAACTATCATTATGGATGATGCTAG
A_22_P00018544	lnc-TBC1D12-1			-9.08113	6.50387	-5.99587	6.10489	8.28718	5.10431	7.53209	4.94812	358.458	40.9259	145.866	30.8632	P	P	P	P	0	lnc-TBC1D12-1:1			lnc-TBC1D12-1:1		THC2562510		RABX5_HUMAN (Q9UJ41) Rab5 GDP/GTP exchange factor (Rabaptin 5-associated exchange factor for Rab5) (Rabex-5), partial (4%) [THC2562510]	chr10:96370936-96370995	hs|10q23.33	GTAGCTAAGGCCTGGCTGTAGCAGTTATAAACTGTTCTGCAAGTGCGGGAAGTAATAGTT
A_22_P00018556	lnc-AAAS-1			-4.52534	6.31015	-3.69747	6.75922	7.49245	5.31442	7.76799	5.88145	201.925	47.0486	171.364	57.8758	P	P	P	P	0	lnc-AAAS-1:1			lnc-AAAS-1:1		THC2661571		ALU6_HUMAN (P39193) Alu subfamily SP sequence contamination warning entry, partial (24%) [THC2661571]	chr12:53694072-53694013	hs|12q13.13	TAAATAAATGGTATCTGAGAACCTACCTCTGGTGATGGTCATATCGGTGTCTCCGAGGGT
A_22_P00018893	lnc-C2CD2-1			-1.60288	8.12969	-4.78763	7.58891	8.47715	7.79648	8.80218	6.54287	411.95	251.783	350.421	92.2346	P	P	P	P	0	lnc-C2CD2-1:1			lnc-C2CD2-1:1				LNCipedia lincRNA (lnc-C2CD2-1), lincRNA [lnc-C2CD2-1:1]	chr21:43294965-43294906	hs|21q22.3	TTTATTTGCCTGAGATGCACCATCTGTTACTGGCTCCGTTTGACCGATCTCCTTGTTCAT
A_22_P00018911	lnc-TRAPPC8-2			4.19254	7.1277	2.1892	6.84964	6.16839	8.23621	6.30771	7.43812	77.8436	335.793	63.672	172.864	P	P	P	P	0	lnc-TRAPPC8-2:1			lnc-TRAPPC8-2:1		THC2687512		ALU8_HUMAN (P39195) Alu subfamily SX sequence contamination warning entry, partial (4%) [THC2687512]	chr18:29671458-29671399	hs|18q12.1	GAGAAATGCCGTAGAAGCATGGACGTGGCTTTTCACCAAGGTTATTCACTAATTTAAGTG
A_22_P00019045	MIR181A2HG	100379345	NR_038975	1.27086	6.46447	-4.37106	7.09035	6.29388	6.63969	8.23373	6.10574	85.6373	115.202	237.488	68.4768	P	P	P	P	0	NR_038975	NR_038975	Hs.660412	MIR181A2 host gene (non-protein coding)		THC2507127		Homo sapiens MIR181A2 host gene (non-protein coding) (MIR181A2HG), long non-coding RNA [NR_038975]	chr9:127460842-127460901	hs|9q33.3	ACTTTGTGATCTCATAACCTGTCAAGGGGCCTGGCATGGAGTAGATAATAAATGTTTTTT
A_22_P00019165	FOXN3	1112	XM_006720352	4.97109	6.21969	2.91193	6.54046	5.16957	7.48313	5.81475	7.35673	38.8449	203.751	45.0281	163.576	P	P	P	P	0	ENST00000553904	XM_006720352	Hs.434286	forkhead box N3	ENST00000553904	THC2756742	GO:0003700(sequence-specific DNA binding transcription factor activity)|GO:0005515(protein binding)|GO:0005634(nucleus)|GO:0006351(transcription, DNA-dependent)|GO:0007095(mitotic cell cycle G2/M transition DNA damage checkpoint)|GO:0008022(protein C-terminus binding)|GO:0043565(sequence-specific DNA binding)|GO:0045892(negative regulation of transcription, DNA-dependent)	forkhead box N3 [Source:HGNC Symbol;Acc:HGNC:1928] [ENST00000553904]	chr14:89952972-89952913	hs|14q32.11	CTGTCTTTTCTGTGACGGGAGCAATGCTGACCTCGGTTTCCTGGACCCATTCCGACTCAG
A_22_P00020127	TRG-AS1	100506776	NR_040085	5.92963	10.098	3.69131	8.82875	8.8953	11.4632	7.93681	9.82094	565.776	2842.51	193.774	869.005	P	P	P	P	0	NR_040085	NR_040085	Hs.173034	T cell receptor gamma locus antisense RNA 1		THC2494276		Homo sapiens T cell receptor gamma locus antisense RNA 1 (TRG-AS1), long non-coding RNA [NR_040085]	chr7:38417929-38417988	hs|7p14.1	TGAATTACCTTTCATGTCCTCTAAACATACCAACAAGGAGGCTGGAGTTAGGACTTATGT
A_22_P00020160				-13.3358	6.28635	-5.60705	6.81814	8.42681	4.68958	8.17425	5.68701	397.291	30.2159	228.541	50.7812	P	P	P	P	0	ENST00000564048	AK123174	Hs.436627		ENST00000564048	THC2622485		Homo sapiens cDNA FLJ41179 fis, clone BRACE2043036. [AK123174]	chr16:49372845-49372904	hs|16q12.1	ACCATCATTAGCAGTGTGCTTGTCCTCTGCTGCTTCCAAAAAGAATAAACTTCAAATGAC
A_22_P00020359	CTTNBP2NL	55917	XM_006710769	-3.68767	6.96204	-5.90983	7.22164	7.96675	6.08404	8.61603	6.05291	281.488	79.4286	309.629	65.6959	P	P	P	P	0	ENST00000607039	XM_006710769	Hs.744100	CTTNBP2 N-terminal like	ENST00000607039	THC2544483	GO:0005515(protein binding)|GO:0005737(cytoplasm)|GO:0006470(protein dephosphorylation)|GO:0015629(actin cytoskeleton)|GO:0032410(negative regulation of transporter activity)|GO:0034763(negative regulation of transmembrane transport)|GO:0051721(protein phosphatase 2A binding)	CTTNBP2 N-terminal like [Source:HGNC Symbol;Acc:HGNC:25330] [ENST00000607039]	chr1:113005884-113005943	hs|1p13.2	GAAAATCAGCTTGACCAAAGTCACAGCTCCTTCCCTGGACAGCTCATATATTAATACAAA
A_22_P00020486	lnc-RARRES2-3			-11.4726	6.66896	-1.26336	5.39701	8.65737	5.13724	5.56827	5.23101	474.159	41.7759	37.7063	37.035	P	P	P	P	0	lnc-RARRES2-3:1			lnc-RARRES2-3:1				LNCipedia lincRNA (lnc-RARRES2-3), lincRNA [lnc-RARRES2-3:1]	chr7:150080948-150080889	hs|7q36.1	GCACAGCTCTCACAGCCTCAGCGCCCCAGGTCGGGCAGTCAGAAGCAGACCATGCCACAG
A_22_P00020547	lnc-ATF7IP2-1			-4.18745	5.47445	-2.60602	5.04797	6.6041	4.53803	5.78596	4.40411	106.577	26.5029	44.0256	21.9402	P	P	P	P	0	lnc-ATF7IP2-1:1			lnc-ATF7IP2-1:1		THC2782668		Q7Z4B3_HUMAN (Q7Z4B3) MSTP160, partial (63%) [THC2782668]	chr16:10625867-10625926	hs|16p13.13	TGTGGGGGTTGCATTCACCTCCCCATCTCCACATGACGATACCCCAGCATTTACGAGGCA
A_22_P00020938	lnc-DHX34-2			-3.69225	6.66885	-7.38641	6.23959	7.67734	5.79284	7.84659	4.96171	229.866	65.2701	181.287	31.1814	P	P	P	P	0	lnc-DHX34-2:1	AK057858	Hs.657320	lnc-DHX34-2:1		THC2526481		Homo sapiens cDNA FLJ25129 fis, clone CBR06594. [AK057858]	chr19:47999580-47999639	hs|19q13.32	GGAAGAACTGGGCTACCTTTGTTGTACTATCTCTTGCAAGATTTTAAATTTGGGAAAGGC
A_22_P00021051	DPYS	1807		-12.0175	6.1398	-30.407	6.97389	8.18993	4.60286	9.85926	4.93293	331.312	27.9003	742.969	30.4552	P	P	P	P	0	ENST00000521601			dihydropyrimidinase	ENST00000521601	THC2776233	GO:0002058(uracil binding)|GO:0002059(thymine binding)|GO:0004157(dihydropyrimidinase activity)|GO:0005829(cytosol)|GO:0006206(pyrimidine base metabolic process)|GO:0006208(pyrimidine base catabolic process)|GO:0006210(thymine catabolic process)|GO:0006212(uracil catabolic process)|GO:0008270(zinc ion binding)|GO:0016597(amino acid binding)|GO:0019482(beta-alanine metabolic process)|GO:0044281(sm…	dihydropyrimidinase [Source:HGNC Symbol;Acc:HGNC:3013] [ENST00000521601]	chr8:105342626-105342567	hs|8q22.3	AGTGGCTGTTCCACATGTCAGCCCTGGACCCACTGTCTTGGGAGAAGATGATCCAAGGAC
A_22_P00021090	lnc-MDH1B-2			1.62875	5.76397	5.37529	5.81227	5.42282	6.12658	4.72436	7.1507	46.0473	81.7631	21.3522	141.471	P	P	P	P	0	lnc-MDH1B-2:1			lnc-MDH1B-2:1				LNCipedia lincRNA (lnc-MDH1B-2), lincRNA [lnc-MDH1B-2:1]	chr2:207985667-207985608	hs|2q33.3	ATGAGAATCAGAAGTATTTATTTGGAATTGGTGTGAATTGGAGCACATGGGGAACTGAAA
A_22_P00021161	lnc-MYBBP1A-2			33.0175	6.53383	13.2835	5.94965	4.4813	9.52646	4.36956	8.10112	23.142	787.067	17.3743	274.32	P	P	P	P	0	lnc-MYBBP1A-2:1	AK093870	Hs.511912	lnc-MYBBP1A-2:1		THC2495774		Homo sapiens cDNA FLJ36551 fis, clone TRACH2008127. [AK093870]	chr17:4383734-4383675	hs|17p13.2	ATGTTAATCTCCCTGAGCCTAAAAGTGGACAATCCCATGAATAAAACATTTGCCAATGCC
A_22_P00021231	LOC101928346	101928346	XR_247876	4.11342	7.17002	1.17598	7.05587	6.22206	8.2624	6.93991	7.17377	81.1736	342.518	97.6287	143.77	P	P	P	P	0	ENST00000541574	XR_247876	Hs.619454	uncharacterized LOC101928346	ENST00000541574			PREDICTED: Homo sapiens uncharacterized LOC101928346 (LOC101928346), ncRNA [XR_247876]	chr12:122031350-122031409	hs|12q24.31	TCCCCCTGATGCGGCTGAGATGTTCTGAAATGAAGACGTTGGCTCTCATCCCCAGCCTGA
A_22_P00021464	lnc-C12orf48-1			-10.0886	6.17735	-27.7528	6.79004	8.06573	4.73108	9.59809	4.80352	301.72	31.2524	616.117	27.6972	P	P	P	P	0	lnc-C12orf48-1:1			lnc-C12orf48-1:1		THC2702980		NUP37_HUMAN (Q8NFH4) Nucleoporin Nup37 (p37), partial (16%) [THC2702980]	chr12:102468449-102468508	hs|12q23.2	CAGTCCAGACTCCATTTTTGCAGTCTACACCAACCAAACAAGCAAAATTAATGTATTTAA
A_22_P00021928	lnc-MTRNR2L3-1			-1.09291	7.32249	6.26466	8.1603	7.38686	7.25869	6.94334	9.59057	187.149	175.137	97.9296	748.33	P	P	P	P	0	lnc-MTRNR2L3-1:1	AK096426	Hs.638423	lnc-MTRNR2L3-1:1		THC2488289		Homo sapiens cDNA FLJ39107 fis, clone NTONG2005062. [AK096426]	chr20:55959444-55959385	hs|20q13.31	TGGGATTCATAAGAGGAGGAAGAAACCTATCATGCTGACGGGTAGTGAAGAAGAGAAATG
A_22_P00021971	lnc-EIF4E3-1			32.0438	7.13463	16.1964	7.13215	5.0593	10.0613	5.40085	9.41845	35.8559	1121.39	33.6017	663.156	P	P	P	P	0	lnc-EIF4E3-1:1	AK022253	Hs.655773	lnc-EIF4E3-1:1		THC2691091		Homo sapiens cDNA FLJ12191 fis, clone MAMMA1000843. [AK022253]	chr3:71619541-71619482	hs|3p13	CCCTTGGATTGGGGAGAGTCTTACAATGAATAACTCAGAAAAAAGTTTTCAAAATAATCC
A_22_P00022135	FAM110A	83541	NM_001289145	5.23966	8.67421	4.21082	8.81347	7.56136	9.95084	7.83722	9.91132	212.135	1042.78	180.203	921.025	P	P	P	P	0	NM_001289145	NM_001289145	Hs.574822	family with sequence similarity 110, member A	ENST00000304189	THC2548840	GO:0000922(spindle pole)|GO:0005515(protein binding)|GO:0005737(cytoplasm)|GO:0005815(microtubule organizing center)	Homo sapiens family with sequence similarity 110, member A (FAM110A), transcript variant 4, mRNA [NM_001289145]	chr20:826320-826379	hs|20p13	AGCAGCTGAAGGCTAGGCGCCACTGGGCCTGGAATTCGCCACAGGACGGATCTTACAGAG
A_22_P00022348				-5.62478	5.86387	-1.47688	5.28763	7.24066	4.74887	5.57638	5.01383	168.26	31.5951	37.8781	32.1948	P	P	P	P	0	ENST00000436492				ENST00000436492				chr6:169123534-169123593	hs|6q27	TGCCCTGGGTCCCTTGGAATAAGCTTGATTTAATTATCAAATTACATGGAAAGAAATAAG
A_22_P00022395	RNF24	11237		1.53967	9.07039	6.19977	8.39404	8.76442	9.38704	7.18048	9.81269	514.274	724.463	114.637	864.455	P	P	P	P	0	ENST00000336095	BX647619	Hs.547576	ring finger protein 24	ENST00000336095	THC2497799	GO:0000139(Golgi membrane)|GO:0008270(zinc ion binding)|GO:0016021(integral to membrane)	ring finger protein 24 [Source:HGNC Symbol;Acc:HGNC:13779] [ENST00000336095]	chr20:3908164-3908105	hs|20p13	ATGCTGAACCTCAGGTTTCATAGACGTCTTTGTACACTAAAAATTCTGCAGCAGAATATT
A_22_P00022412	RNF125	54941	NM_017831	13.564	8.42135	37.2167	7.42013	6.74797	10.5097	5.25648	10.4744	117.422	1516.41	30.3872	1357.61	P	P	P	P	0	NM_017831	NM_017831	Hs.633703	ring finger protein 125, E3 ubiquitin protein ligase	ENST00000580863	THC2666944	GO:0004842(ubiquitin-protein ligase activity)|GO:0008270(zinc ion binding)|GO:0016567(protein ubiquitination)|GO:0016874(ligase activity)|GO:0032480(negative regulation of type I interferon production)|GO:0045087(innate immune response)	Homo sapiens ring finger protein 125, E3 ubiquitin protein ligase (RNF125), mRNA [NM_017831]	chr18:29622177-29622236	hs|18q12.1	TTGTCAGAAGTACATAGATAAGTATGGACCACTACAAGAACTTGAGGAGACAGCAGCAAG
A_22_P00022881	LOC101926963	101926963	NR_110054	-4.54734	6.51561	-2.58635	6.46677	7.69908	5.51406	7.18845	5.81754	233.123	54.2425	115.041	55.3463	P	P	P	P	0	NR_110054	NR_110054	Hs.521338	uncharacterized LOC101926963				Homo sapiens uncharacterized LOC101926963 (LOC101926963), transcript variant 1, long non-coding RNA [NR_110054]	chr7:642836-642895	hs|7p22.3	AGAGGGAGAAGCATTCCACAGGGGAGGAAAGGCCTCAGTGGGGACCTATGGAGCTCCCAG
A_22_P00022896	LOC101927596	101927596	XR_241378	20.0309	8.38837	2.20113	8.73471	6.50045	10.8246	8.18411	9.32236	99.3747	1886.53	230.021	620.07	P	P	P	P	0	XR_241378	XR_241378		uncharacterized LOC101927596		THC2668267		PREDICTED: Homo sapiens uncharacterized LOC101927596 (LOC101927596), transcript variant X1, ncRNA [XR_241378]	chr2:198063882-198063941	hs|2q33.1	GCCTTCACAGTTTAGGTTTTGGTAAGAAGAAAGCTTATCTTCATGTCATGAGAAAGAAAA
A_22_P00023347	lnc-C12orf49-2			5.61418	8.6925	5.35668	8.63336	7.5366	10.0257	7.50717	9.9285	208.163	1096.17	143.434	931.394	P	P	P	P	0	lnc-C12orf49-2:1			lnc-C12orf49-2:1		THC2724097		ALU1_HUMAN (P39188) Alu subfamily J sequence contamination warning entry, partial (10%) [THC2724097]	chr12:116619069-116619010	hs|12q24.21	TTAGATTTCGAGGGGACTGTTTTCTGTTTAAGAAGTAACTCATTTTGCCGGGTGCGGTGG
A_22_P00023374	INAFM2	100505573	NM_001301268	6.83678	9.56484	5.6396	10.5241	8.27817	11.0515	9.35005	11.8456	356.066	2189.43	515.856	3497.01	P	P	P	P	0	NM_001301268		Hs.530791	InaF-motif containing 2		THC2601518	GO:0016021(integral to membrane)	Homo sapiens InaF-motif containing 2 (INAFM2), mRNA [NM_001301268]	chr15:40618784-40618843	hs|15q15.1	GCTGTGAACATGACCAGAGACATTATTTATAATTCAGCCATTTAAGATATACCTGTACTC
A_22_P00023378	TSPAN33	340348	NM_178562	-17.3782	9.48525	-5.35904	9.7529	11.7659	7.64668	11.0388	8.6168	4633.96	226.625	1654.38	387.432	P	P	P	P	0	NM_178562	NM_178562	Hs.27267	tetraspanin 33	ENST00000498745	THC2697051	GO:0005886(plasma membrane)|GO:0009986(cell surface)|GO:0016021(integral to membrane)|GO:0019899(enzyme binding)|GO:0051604(protein maturation)|GO:0090002(establishment of protein localization in plasma membrane)|GO:0097197(tetraspanin-enriched microdomain)	Homo sapiens tetraspanin 33 (TSPAN33), mRNA [NM_178562]	chr7:128809471-128809530	hs|7q32.1	CCAGTGTTTAGCTCCCAACTAGTAACAGACGGAAAGAAAAAATAAAATTATCCAGAATCT
A_22_P00023477	lnc-AC018816.3.1-4			-11.2369	5.87923	-6.20678	5.49688	7.87784	4.38767	6.96935	4.33551	264.523	23.1344	99.2469	21.1353	P	P	P	P	0	lnc-AC018816.3.1-4:1			lnc-AC018816.3.1-4:1				LNCipedia lincRNA (lnc-AC018816.3.1-4), lincRNA [lnc-AC018816.3.1-4:1]	chr3:5198700-5198641	hs|3p26.1	CAAAACCTAGAATGTCGCAGTACTCGAAGTATCCAAAACAACTGAAAAATGAAGAAGAAT
A_22_P00023495	NDUFV2-AS1	101927275	NR_110771	3.84244	8.31949	4.09719	8.76209	7.40496	9.34698	7.80363	9.83826	189.698	705.398	176.029	879.016	P	P	P	P	0	NR_110771	NR_110771		NDUFV2 antisense RNA 1		THC2687230		Homo sapiens NDUFV2 antisense RNA 1 (NDUFV2-AS1), transcript variant 1, long non-coding RNA [NR_110771]	chr18:9121322-9121263	hs|18p11.22	ATTCTGCACATCTCCCTACACCTTAGTGACGGTTAAATAAATAATTATTAAGCTTCTGGA
A_22_P00023552	LOC101929021	101929021	XR_246125	-4.12481	7.40468	-9.38146	8.29216	8.49707	6.45274	10.0629	6.83304	417.425	100.757	855.003	112.84	P	P	P	P	0	XR_246125	XR_246125		uncharacterized LOC101929021				PREDICTED: Homo sapiens uncharacterized LOC101929021 (LOC101929021), transcript variant X1, ncRNA [XR_246125]	chr10:71336835-71336894	hs|10q22.1	CGAAAAGAAAGCCCCACCTGTCTCCAGTGTTTGCTAAAATAATAATAAATAGATTTCGTT
A_22_P00023990	lnc-PLXND1-1			1.52742	6.99813	-4.06113	6.31163	6.69925	7.31034	7.40302	5.38114	113.444	180.98	132.75	41.183	P	P	P	P	0	lnc-PLXND1-1:1	AK026915	Hs.677407	lnc-PLXND1-1:1		THC2563546		Homo sapiens cDNA: FLJ23262 fis, clone COL05922. [AK026915]	chr3:129465409-129465350	hs|3q22.1	CTTGGCTCATTATCACCAAGTTTACTTGCAGGATCAAATTTAGAACCATGGTTTGTAATA
A_22_P00024240	lnc-FPGS-1			6.44289	7.71229	-1.21939	7.66068	6.48464	9.17235	7.8051	7.51894	98.1695	624.89	176.308	182.829	P	P	P	P	0	lnc-FPGS-1:1	AK057719	Hs.732940	lnc-FPGS-1:1				Homo sapiens cDNA FLJ33157 fis, clone UTERU2000393. [AK057719]	chr9:130584622-130584681	hs|9q34.11	AGACAGCGAAGAGGTTGAGGTGTTCTCGTAAATCAGTGGTGAAAATTCAAATCATCTTTG
A_22_P00024323	lnc-C5orf42-3			-4.0067	7.29211	-3.04681	7.38601	8.36173	6.35932	8.23325	6.62595	378.47	94.5321	237.476	97.4077	P	P	P	P	0	lnc-C5orf42-3:3			lnc-C5orf42-3:3		THC2695175		LNCipedia lincRNA (lnc-C5orf42-3), lincRNA [lnc-C5orf42-3:3]	chr5:36666410-36666351	hs|5p13.2	GGCAAACTTACAAGGAAAGCAAGGATGAGTGCTAATATGTACCATATTCATGTGAATATA
A_22_P00024329	MGC16275	85001	NR_026914	4.71094	5.80128	1.93392	6.26795	4.79002	7.02603	5.81021	6.76174	29.3439	150.169	44.9093	107.263	P	P	P	P	0	NR_026914	NR_026914	Hs.706954	uncharacterized protein MGC16275		THC2534884		Homo sapiens uncharacterized protein MGC16275 (MGC16275), long non-coding RNA [NR_026914]	chr17:72206444-72206385	hs|17q25.1	AAACAGGCTGAAAACAGATGGCCTCATTTGCCGACTGAGATCATGCTCAAGATTAGGGAT
A_22_P00024423				-2.8976	5.57195	-8.12418	6.22513	6.39198	4.85712	7.91702	4.8948	91.904	34.1125	191.157	29.5744	P	P	P	P	0	ENST00000581626	AL711312	Hs.574475		ENST00000581626			DKFZp686P1879_r1 686 (synonym: hlcc3) Homo sapiens cDNA clone DKFZp686P1879 5', mRNA sequence [AL711312]	chr18:75336368-75336427	hs|18q23	TACACACTGAAGCCTCACCATTGTGCTCCCGTCAAAGCCCTGGTTTCCTCCATGGGAGCT
A_22_P00024564	LOC102724094	102724094	NR_120519	-1.55507	9.31979	-5.26283	9.76697	9.64373	9.00674	11.0381	8.64224	978.116	553.919	1654	393.726	P	P	P	P	0	NR_120519	NR_120519		uncharacterized LOC102724094		THC2549675		Homo sapiens uncharacterized LOC102724094 (LOC102724094), transcript variant 1, long non-coding RNA [NR_120519]	chr7:100658538-100658479	hs|7q22.1	TGAGACCCAGACGCTCCATCTCAGCTTCCCCATGTGGTGCTGTGCTCTGTGGTGGCCAAG
A_22_P00024826	lnc-CHP2.1-1			4.05625	6.02995	-1.2077	6.79844	5.10389	7.12404	6.93593	6.66367	37.1027	159.809	97.4527	99.7271	P	P	P	P	0	lnc-CHP2.1-1:1	AK128348	Hs.667890	lnc-CHP2.1-1:1		THC2486117		Homo sapiens cDNA FLJ46490 fis, clone THYMU3027540. [AK128348]	chr16:23888409-23888468	hs|16p12.2	CTAATGACTGTTTCCTTCAGGACACCAGAGATGGGGTGAATAACTCTGTAAAAGATGCAA
A_22_P00025136	lnc-TIGIT-1			4.54514	8.0483	5.50821	6.72584	7.0299	9.21422	5.60673	8.06832	144.912	644.116	38.8439	268.319	P	P	P	P	0	lnc-TIGIT-1:2	AK092902	Hs.724900	lnc-TIGIT-1:2		THC2508183		Homo sapiens cDNA FLJ35583 fis, clone SPLEN2006701. [AK092902]	chr3:113954940-113954999	hs|3q13.31	TTTATCTCTGGAAGGAATTCTTCAATGCCAAGTGAGGATGAGCTGCAGGTCACAGCTTTC
A_22_P00025545	CECR7	100130418	NR_015352	-11.2844	5.98945	-3.99491	6.99801	7.98748	4.49122	8.06805	6.06989	285.823	25.5557	212.03	66.4412	P	P	P	P	0	NR_015352	NR_015352	Hs.660640	cat eye syndrome chromosome region, candidate 7 (non-protein coding)	ENST00000441006	THC2492170		Homo sapiens cat eye syndrome chromosome region, candidate 7 (non-protein coding) (CECR7), long non-coding RNA [NR_015352]	chr22:17539623-17539682	hs|22q11.1	CACTGAGTTTTTCCTCCATTGTTGTAAAACATGTGTTTTGCTCTTGTGTGTAAAATGACT
A_22_P00025678	lnc-PRMT8-2			32.0132	8.39293	4.39317	8.99833	6.25714	11.2577	7.99381	10.1291	83.5353	2505.57	200.943	1075.36	P	P	P	P	0	lnc-PRMT8-2:1	BX096603	Hs.564504	lnc-PRMT8-2:1		THC2643991		BX096603 Soares_testis_NHT Homo sapiens cDNA clone IMAGp998H151782, mRNA sequence [BX096603]	chr12:4019432-4019491	hs|12p13.32	ATTACGCTTCACTGGGCCCTGGAGGATATTGTCTTATACAGTCCACTGGGTTTTGGATAT
A_22_P00025914			XM_005264677	-8.42136	8.03172	-15.7965	7.8887	9.71449	6.64044	10.1268	6.14525	1034.61	115.306	894.202	70.4549	P	P	P	P	0	ENST00000561559	XM_005264677	Hs.187018		ENST00000561559	THC2607546		PREDICTED: Homo sapiens uncharacterized LOC101927402 (LOC101927402), mRNA [XM_005264677]	chr2:64749738-64749679	hs|2p14	GTGCCCTAATGCTCATGACATTTTATTACAAAGGGAAAGTATTTGAGTGTTTTTAAGGTG
A_23_P100001	FAM174B	400451	NM_207446	-35.9512	8.45853	-10.9146	6.93923	11.4284	6.26043	8.8743	5.42611	3601.09	88.8979	366.803	42.3788	P	P	P	P	0	NM_207446	NM_207446	Hs.27373	family with sequence similarity 174, member B	ENST00000327355	THC2462674	GO:0016021(integral to membrane)	Homo sapiens family with sequence similarity 174, member B (FAM174B), mRNA [NM_207446]	chr15:93160848-93160789	hs|15q26.1	ATCTCATGGAAAAGCTGGATTCCTCTGCCTTACGCAGAAACACCCGGGCTCCATCTGCCA
A_23_P100127	CASC5	57082	NM_170589	-25.8852	7.87308	-6.6081	7.98643	10.5625	5.86845	9.46387	6.73964	1916.57	68.9352	557.342	105.743	P	P	P	P	0	NM_170589	NM_170589	Hs.181855	cancer susceptibility candidate 5	ENST00000527044	THC2474180	GO:0000278(mitotic cell cycle)|GO:0000777(condensed chromosome kinetochore)|GO:0001669(acrosomal vesicle)|GO:0001675(acrosome assembly)|GO:0005515(protein binding)|GO:0005634(nucleus)|GO:0005654(nucleoplasm)|GO:0005737(cytoplasm)|GO:0005829(cytosol)|GO:0006334(nucleosome assembly)|GO:0007067(mitosis)|GO:0008608(attachment of spindle microtubules to kinetochore)|GO:0010923(negative regulation of p…	Homo sapiens cancer susceptibility candidate 5 (CASC5), transcript variant 1, mRNA [NM_170589]	chr15:40917525-40917584	hs|15q15.1	CGGTCTCTAGCAAAGATTCAGGCATTGGATCTGTTGCAGGTAAACTGAACCTAAGTCCTT
A_23_P100203	HSBP1	3281	NM_001537	3.33353	9.44335	4.48821	9.31414	8.61468	10.3517	8.29383	10.46	457.342	1361.8	246.475	1345.25	P	P	P	P	0	NM_001537	NM_001537	Hs.250899	heat shock factor binding protein 1	ENST00000433866	THC2465419	GO:0000122(negative regulation of transcription from RNA polymerase II promoter)|GO:0003714(transcription corepressor activity)|GO:0005634(nucleus)|GO:0005654(nucleoplasm)|GO:0005856(cytoskeleton)|GO:0006936(muscle contraction)|GO:0034605(cellular response to heat)|GO:0035987(endodermal cell differentiation)|GO:1900034(regulation of cellular response to heat)	Homo sapiens heat shock factor binding protein 1 (HSBP1), mRNA [NM_001537]	chr16:83846244-83846303	hs|16q23.3	ACAAATTACATGGGGAACATAAAGGAGTGAGATCCTTCTGTGATAAAATGAATTCACCAC
A_23_P100420	ZCCHC14	23174	NM_015144	5.95196	8.05697	4.6343	8.07145	6.87238	9.44575	7.04072	9.25307	128.307	748.618	104.181	593.32	P	P	P	P	0	NM_015144	NM_015144	Hs.156231	zinc finger, CCHC domain containing 14	ENST00000568020	THC2462853	GO:0003676(nucleic acid binding)|GO:0008270(zinc ion binding)|GO:0035091(phosphatidylinositol binding)	Homo sapiens zinc finger, CCHC domain containing 14 (ZCCHC14), mRNA [NM_015144]	chr16:87440191-87440132	hs|16q24.2	GCTTTGGTACTGAAACTGGACACCTTGTGTACTCGATACCTTCACAGCTTCTATTGGACA
A_23_P100499	ROGDI	79641	NM_024589	5.1761	7.55022	6.29821	7.43344	6.45686	8.82873	6.22357	8.87851	96.5894	495.88	59.5572	467.277	P	P	P	P	0	NM_024589	NM_024589	Hs.459795	rogdi homolog (Drosophila)	ENST00000585653	NP1204611	GO:0005622(intracellular)|GO:0005635(nuclear envelope)|GO:0008284(positive regulation of cell proliferation)|GO:0030097(hemopoiesis)	Homo sapiens rogdi homolog (Drosophila) (ROGDI), transcript variant 1, mRNA [NM_024589]	chr16:4850504-4849729	hs|16p13.3	CAGCAGATCCAGGATGCCAGAAACCATGTGAGCCAAGCCATTTACCTGCTTACCAGCCGG
A_23_P100632	HN1	51155	NM_001002033	-4.64812	14.8906	-2.91749	14.7033	16.0401	13.8235	15.4959	13.9512	86945.8	13672	41845.4	14460.3	MP	MP	P	MP	0	NM_001002033	NM_001002033	Hs.532803	hematological and neurological expressed 1	ENST00000481647	THC2547480	GO:0005634(nucleus)|GO:0032502(developmental process)	Homo sapiens hematological and neurological expressed 1 (HN1), transcript variant 3, mRNA [NM_001002033]	chr17:73132162-73132103	hs|17q25.1	TTCCTCCATGCTTGTGAACTGCACAACTTGAGCCTGACTGTACATCTCTTGGATTTGTTT
A_23_P100704	MAPK7	5598	NM_139033	1.97874	10.1481	4.06747	10.3531	9.66773	10.6523	9.39036	11.4145	995.586	1671.98	530.61	2608.19	P	P	P	P	0	NM_139033	NM_139033	Hs.150136	mitogen-activated protein kinase 7	ENST00000570306	THC2486785	GO:0002224(toll-like receptor signaling pathway)|GO:0002755(MyD88-dependent toll-like receptor signaling pathway)|GO:0002756(MyD88-independent toll-like receptor signaling pathway)|GO:0004707(MAP kinase activity)|GO:0005515(protein binding)|GO:0005524(ATP binding)|GO:0005634(nucleus)|GO:0005654(nucleoplasm)|GO:0005737(cytoplasm)|GO:0005829(cytosol)|GO:0007049(cell cycle)|GO:0007165(signal transdu…	Homo sapiens mitogen-activated protein kinase 7 (MAPK7), transcript variant 1, mRNA [NM_139033]	chr17:19286634-19286693	hs|17p11.2	GTGAGGCTCGGCTTGGATTATTCTGCAGGTTCATCTCAGACCCACCTTTCAGCCTTAAGC
A_23_P10077	PNPLA2	57104	NM_020376	4.25495	9.35656	6.45267	9.67049	8.37012	10.4593	8.41862	11.1085	380.736	1467.06	268.129	2107.54	P	P	P	M	0	NM_020376	NM_020376	Hs.654697	patatin-like phospholipase domain containing 2	ENST00000529255	THC2466068	GO:0004806(triglyceride lipase activity)|GO:0005789(endoplasmic reticulum membrane)|GO:0005811(lipid particle)|GO:0005829(cytosol)|GO:0005886(plasma membrane)|GO:0006644(phospholipid metabolic process)|GO:0010891(negative regulation of sequestering of triglyceride)|GO:0010898(positive regulation of triglyceride catabolic process)|GO:0016021(integral to membrane)|GO:0019433(triglyceride catabolic …	Homo sapiens patatin-like phospholipase domain containing 2 (PNPLA2), mRNA [NM_020376]	chr11:824896-824955	hs|11p15.5	CGCCTCCATTACCACTGCGCAGTGAGATGAGGGGACTCACAGTTGCCAAGAGGGGTCTTT
A_23_P100963	SPNS3	201305	NM_182538	4.95607	9.24919	15.4326	7.65371	8.16638	10.4756	5.93021	9.87811	325.649	1481.74	48.5781	900.704	P	P	P	P	0	NM_182538	NM_182538	Hs.657543	spinster homolog 3 (Drosophila)	ENST00000355530	THC2602852	GO:0003376(sphingosine-1-phosphate signaling pathway)|GO:0005765(lysosomal membrane)|GO:0006869(lipid transport)|GO:0016021(integral to membrane)|GO:0031982(vesicle)|GO:0040011(locomotion)|GO:0046624(sphingolipid transporter activity)|GO:0055085(transmembrane transport)	Homo sapiens spinster homolog 3 (Drosophila) (SPNS3), mRNA [NM_182538]	chr17:4391247-4391306	hs|17p13.2	TGCCTCGGTTCCTCTTTGGCTGTCCTCGGGGACTCCGGCTGAGGCACATCTGCCACTTTT
A_23_P101392	TMEM38A	79041	NM_024074	-31.453	8.20082	-15.4113	9.49976	11.0574	6.08223	11.6754	7.72952	2754.5	79.332	2576.72	212.056	P	P	P	P	0	NM_024074	NM_024074	Hs.436068	transmembrane protein 38A	ENST00000187762	THC2474704	GO:0005267(potassium channel activity)|GO:0016021(integral to membrane)|GO:0031965(nuclear membrane)|GO:0033017(sarcoplasmic reticulum membrane)|GO:0070062(extracellular vesicular exosome)|GO:0071805(potassium ion transmembrane transport)	Homo sapiens transmembrane protein 38A (TMEM38A), mRNA [NM_024074]	chr19:16799430-16799489	hs|19p13.11	TTCACAGAATCCTGGCAGCAGCTCCAGTCAAGAATGTCACTGGTTGGCATGATATTCTTA
A_23_P1014	LINC00467	84791	NR_026761	-4.56553	9.42945	-4.84441	9.40706	10.5882	8.39747	10.6138	8.33751	1957.28	374.215	1245.68	321.589	P	P	P	P	0	NR_026761	NR_026761	Hs.523932	long intergenic non-protein coding RNA 467	ENST00000610948	THC2472955		Homo sapiens long intergenic non-protein coding RNA 467 (LINC00467), long non-coding RNA [NR_026761]	chr1:211605740-211605799	hs|1q32.3	CCAGCACTGTGAAGCCTACAAAAACATTGATGCGCTGGCTTGGGGATTTGAATTTGAACA
A_23_P101551	BCAT2	587	NM_001190	-2.88245	10.2685	-6.54507	10.6363	11.0605	9.53324	12.0775	9.36713	2760.24	790.399	3430.45	639.928	P	P	P	P	0	NM_001190	NM_001190	Hs.512670	branched chain amino-acid transaminase 2, mitochondrial	ENST00000316273	THC2495202	GO:0004084(branched-chain-amino-acid transaminase activity)|GO:0005739(mitochondrion)|GO:0005759(mitochondrial matrix)|GO:0006550(isoleucine catabolic process)|GO:0006551(leucine metabolic process)|GO:0006573(valine metabolic process)|GO:0009082(branched chain family amino acid biosynthetic process)|GO:0009083(branched chain family amino acid catabolic process)|GO:0010817(regulation of hormone le…	Homo sapiens branched chain amino-acid transaminase 2, mitochondrial (BCAT2), transcript variant a, mRNA [NM_001190]	chr19:49298622-49298563	hs|19q13.33	TCCCTACCAATGACTCACCTGAAGTGCAATACGAAATAAAAGGCCAGCGGGCGGCGTCTG
A_23_P101960	ZFP36L2	678	NM_006887	9.63661	12.2385	13.8974	12.569	10.7128	13.9814	10.8132	14.6099	2133.51	15364.9	1422.3	23385.7	P	P	P	MP	0	NM_006887	NM_006887	Hs.503093	ZFP36 ring finger protein-like 2	ENST00000282388	THC2485818	GO:0000288(nuclear-transcribed mRNA catabolic process, deadenylation-dependent decay)|GO:0003677(DNA binding)|GO:0003700(sequence-specific DNA binding transcription factor activity)|GO:0005634(nucleus)|GO:0005737(cytoplasm)|GO:0006355(regulation of transcription, DNA-dependent)|GO:0006402(mRNA catabolic process)|GO:0008283(cell proliferation)|GO:0017091(AU-rich element binding)|GO:0030097(hemopoi…	Homo sapiens ZFP36 ring finger protein-like 2 (ZFP36L2), mRNA [NM_006887]	chr2:43451215-43451156	hs|2p21	AGCAAAAAAGTCGAACTTTTTCTGTTGAACAAAATATTCACAACAGGGCAGTTGTGATAC
A_23_P102000	CXCR4	7852	NM_001008540	11.6955	14.2262	577.334	12.2939	12.5625	16.1103	8.53502	17.7083	8192.1	66615.7	292.359	192109	P	P	MP	P	0	NM_001008540	NM_001008540	Hs.593413	chemokine (C-X-C motif) receptor 4	ENST00000241393	THC2468169	GO:0000187(activation of MAPK activity)|GO:0001569(patterning of blood vessels)|GO:0001618(viral receptor activity)|GO:0001666(response to hypoxia)|GO:0001667(ameboidal cell migration)|GO:0001764(neuron migration)|GO:0002407(dendritic cell chemotaxis)|GO:0003779(actin binding)|GO:0004930(G-protein coupled receptor activity)|GO:0005515(protein binding)|GO:0005737(cytoplasm)|GO:0005764(lysosome)|GO…	Homo sapiens chemokine (C-X-C motif) receptor 4 (CXCR4), transcript variant 1, mRNA [NM_001008540]	chr2:136872012-136871953	hs|2q22.1	TGCTGGTTTTTCAGTTTTCAGGAGTGGGTTGATTTCAGCACCTACAGTGTACAGTCTTGT
A_23_P102117	WNT10A	80326	NM_025216	-10.822	8.43364	-21.1321	7.92234	10.3248	6.88889	10.423	6.02163	1611.02	137.458	1095.32	64.1857	P	P	P	P	0	NM_025216	NM_025216	Hs.121540	wingless-type MMTV integration site family, member 10A	ENST00000258411	THC2472056	GO:0001942(hair follicle development)|GO:0005109(frizzled binding)|GO:0005576(extracellular region)|GO:0005578(proteinaceous extracellular matrix)|GO:0005615(extracellular space)|GO:0010628(positive regulation of gene expression)|GO:0014033(neural crest cell differentiation)|GO:0016055(Wnt receptor signaling pathway)|GO:0030182(neuron differentiation)|GO:0031069(hair follicle morphogenesis)|GO:00…	Homo sapiens wingless-type MMTV integration site family, member 10A (WNT10A), mRNA [NM_025216]	chr2:219758393-219758452	hs|2q35	AAGAAATAGACATAACTGAGCTGAAGTAATTCCATAAAGGGCCCAGACAGCCTCCTCCAC
A_23_P102706	SNPH	9751	NM_014723	6.54808	7.42438	-1.00254	8.53879	6.19158	8.90265	8.54062	8.53695	79.2965	520.577	293.635	368.685	P	P	P	P	0	NM_014723	NM_014723	Hs.323833	syntaphilin	ENST00000614659	THC2464974	GO:0005737(cytoplasm)|GO:0005881(cytoplasmic microtubule)|GO:0007269(neurotransmitter secretion)|GO:0007420(brain development)|GO:0016021(integral to membrane)|GO:0016081(synaptic vesicle docking involved in exocytosis)|GO:0017075(syntaxin-1 binding)|GO:0030054(cell junction)|GO:0030182(neuron differentiation)|GO:0031966(mitochondrial membrane)|GO:0042734(presynaptic membrane)|GO:0043005(neuron p…	Homo sapiens syntaphilin (SNPH), mRNA [NM_014723]	chr20:1289612-1289671	hs|20p13	TAGATTTCTCCCAAGGGGATCACTTAGCTTCTCACTGACACACCCTTCCCAATTGCCACA
A_23_P103110	MAFF	23764	NM_012323	-1.34092	7.42352	20.6772	8.31188	7.63815	7.21493	6.40929	10.7793	223.905	169.858	68.0384	1669.09	P	P	P	P	0	NM_012323	NM_012323	Hs.517617	v-maf avian musculoaponeurotic fibrosarcoma oncogene homolog F	ENST00000538320	THC2466913	GO:0001701(in utero embryonic development)|GO:0003700(sequence-specific DNA binding transcription factor activity)|GO:0005654(nucleoplasm)|GO:0006355(regulation of transcription, DNA-dependent)|GO:0006366(transcription from RNA polymerase II promoter)|GO:0007567(parturition)|GO:0007596(blood coagulation)|GO:0035914(skeletal muscle cell differentiation)|GO:0043565(sequence-specific DNA binding)|GO…	Homo sapiens v-maf avian musculoaponeurotic fibrosarcoma oncogene homolog F (MAFF), transcript variant 1, mRNA [NM_012323]	chr22:38611984-38612043	hs|22q13.1	CTCCCTGGGAAAAGTGGCGTATGGCCCTGAGCTGGGCTTTATATTTTATATCTGCAAATA
A_23_P103361	LCK	3932	NM_005356	9.24568	12.448	8.70254	11.5429	10.9466	14.1554	10.0872	13.2087	2538.76	17317	867.609	8858.21	P	P	P	P	0	NM_005356	NM_005356	Hs.470627	LCK proto-oncogene, Src family tyrosine kinase	ENST00000469765	NP1180168	GO:0000242(pericentriolar material)|GO:0001772(immunological synapse)|GO:0001948(glycoprotein binding)|GO:0003823(antigen binding)|GO:0004713(protein tyrosine kinase activity)|GO:0004715(non-membrane spanning protein tyrosine kinase activity)|GO:0004722(protein serine/threonine phosphatase activity)|GO:0005515(protein binding)|GO:0005524(ATP binding)|GO:0005829(cytosol)|GO:0005886(plasma membrane…	Homo sapiens LCK proto-oncogene, Src family tyrosine kinase (LCK), transcript variant 2, mRNA [NM_005356]	chr1:32751432-32751491	hs|1p35.1	CCCACCCACATGTGACACATATGCACCTTGTGTCTGTACACGTGTCCTGTAGTTGCGTGG
A_23_P103601	MAN1C1	57134	NM_020379	12.9646	10.0291	14.4541	9.34551	8.34976	12.0463	7.61535	11.4688	374.624	4210.65	153.815	2709.75	P	P	P	P	0	NM_020379	NM_020379	Hs.197043	mannosidase, alpha, class 1C, member 1	ENST00000263979	NP1210903	GO:0000139(Golgi membrane)|GO:0004571(mannosyl-oligosaccharide 1,2-alpha-mannosidase activity)|GO:0005509(calcium ion binding)|GO:0006487(protein N-linked glycosylation)|GO:0018279(protein N-linked glycosylation via asparagine)|GO:0030173(integral to Golgi membrane)|GO:0043687(post-translational protein modification)|GO:0044267(cellular protein metabolic process)|GO:0070062(extracellular vesicula…	Homo sapiens mannosidase, alpha, class 1C, member 1 (MAN1C1), transcript variant 1, mRNA [NM_020379]	chr1:26110835-26110894	hs|1p36.11	GGGGTTTCCCTTTGGGCCTCAGTGTTACAAATTACTAGTGCTATTTTCATTATTATTGTA
A_23_P103775	LRRC8C	84230	NM_032270	5.86531	7.97088	3.14732	8.76129	6.79628	9.34849	7.97318	9.6273	121.46	706.373	198.413	764.719	P	P	P	P	0	NM_032270	NM_032270	Hs.412836	leucine rich repeat containing 8 family, member C	ENST00000370454	THC2474475	GO:0005515(protein binding)|GO:0005789(endoplasmic reticulum membrane)|GO:0005886(plasma membrane)|GO:0006811(ion transport)|GO:0016020(membrane)|GO:0016021(integral to membrane)|GO:0045444(fat cell differentiation)	Homo sapiens leucine rich repeat containing 8 family, member C (LRRC8C), mRNA [NM_032270]	chr1:90180324-90180383	hs|1p22.2	AAACTCTGAAGATTGGAAAAAACAGCCTATCTGTACTTTCACCGAAAATTGGAAATTTGC
A_23_P103932	FGR	2268	NM_001042747	31.5711	13.3251	1.91126	15.4221	11.0655	16.046	14.9619	15.8964	2770.36	63988.8	27147.9	54876.5	P	P	P	P	0	NM_001042747	NM_001042747	Hs.1422	FGR proto-oncogene, Src family tyrosine kinase	ENST00000374004	THC2462697	GO:0001784(phosphotyrosine binding)|GO:0002768(immune response-regulating cell surface receptor signaling pathway)|GO:0004713(protein tyrosine kinase activity)|GO:0004715(non-membrane spanning protein tyrosine kinase activity)|GO:0005515(protein binding)|GO:0005524(ATP binding)|GO:0005743(mitochondrial inner membrane)|GO:0005758(mitochondrial intermembrane space)|GO:0005829(cytosol)|GO:0005856(cy…	Homo sapiens FGR proto-oncogene, Src family tyrosine kinase (FGR), transcript variant 2, mRNA [NM_001042747]	chr1:27938897-27938838	hs|1p36.11	TTGCAGAGCACTTCCCACCTCTCTGAATAGTGTGTATGTGTTGGTTTATTGATTCTGTAA
A_23_P104046	BPNT1	10380	NM_006085	-3.07403	10.5718	-9.12534	10.2035	11.4128	9.7927	11.9223	8.73247	3554.3	939.648	3074.93	419.555	P	P	P	P	0	NM_006085	NM_006085	Hs.406134	3'(2'), 5'-bisphosphate nucleotidase 1	ENST00000469520	NP414856	GO:0000287(magnesium ion binding)|GO:0004441(inositol-1,4-bisphosphate 1-phosphatase activity)|GO:0005829(cytosol)|GO:0006139(nucleobase-containing compound metabolic process)|GO:0006805(xenobiotic metabolic process)|GO:0007399(nervous system development)|GO:0008441(3'(2'),5'-bisphosphate nucleotidase activity)|GO:0016311(dephosphorylation)|GO:0044281(small molecule metabolic process)|GO:0046854(…	Homo sapiens 3'(2'), 5'-bisphosphate nucleotidase 1 (BPNT1), transcript variant 1, mRNA [NM_006085]	chr1:220233109-220233050	hs|1q41	GCCTCTGCTTATGTATTTGCAAGTCCTGGTTGTAAGAAGTGGGATACTTGTGCTCCAGAA
A_23_P104199	ITGB1	3688	NM_133376	10.4954	8.35859	8.2353	9.21198	6.83304	10.2247	7.81578	10.8576	124.396	1246.73	177.711	1760.42	P	P	P	P	0	NM_133376	NM_133376	Hs.643813	integrin, beta 1 (fibronectin receptor, beta polypeptide, antigen CD29 includes MDF2, MSK12)	ENST00000494395	THC2580179	GO:0000082(G1/S transition of mitotic cell cycle)|GO:0001618(viral receptor activity)|GO:0001669(acrosomal vesicle)|GO:0001701(in utero embryonic development)|GO:0001708(cell fate specification)|GO:0001726(ruffle)|GO:0001894(tissue homeostasis)|GO:0001948(glycoprotein binding)|GO:0001968(fibronectin binding)|GO:0002020(protease binding)|GO:0002042(cell migration involved in sprouting angiogenesis…	Homo sapiens integrin, beta 1 (fibronectin receptor, beta polypeptide, antigen CD29 includes MDF2, MSK12) (ITGB1), transcript variant 1E, mRNA [NM_133376]	chr10:33200566-33200507	hs|10p11.22	TGCAACCCCAACTACACTGGCAGTGCATGTGACTGTTCTTTGGATACTAGTACTTGTGAA
A_23_P104563	CPT1A	1374	NM_001031847	-1.03411	8.95977	4.36305	8.96589	8.984	8.93561	7.96598	10.0913	605.026	531.522	197.264	1046.83	P	P	P	P	0	NM_001031847	NM_001031847	Hs.503043	carnitine palmitoyltransferase 1A (liver)	ENST00000539743	THC2464485	GO:0001676(long-chain fatty acid metabolic process)|GO:0004095(carnitine O-palmitoyltransferase activity)|GO:0005739(mitochondrion)|GO:0005741(mitochondrial outer membrane)|GO:0005743(mitochondrial inner membrane)|GO:0006006(glucose metabolic process)|GO:0006635(fatty acid beta-oxidation)|GO:0006641(triglyceride metabolic process)|GO:0006853(carnitine shuttle)|GO:0007623(circadian rhythm)|GO:0009…	Homo sapiens carnitine palmitoyltransferase 1A (liver) (CPT1A), transcript variant 2, mRNA [NM_001031847]	chr11:68527122-68527063	hs|11q13.3	ATGACGGCTATGGTGTGTCGTACATCCTTGTGGGAGAGAACCTCATCAATTTCCACATTT
A_23_P104651	CDCA5	113130	NM_080668	-61.4616	9.38618	-34.0949	8.91004	12.8159	6.8743	11.8123	6.72084	9756.43	136.172	2836.3	104.002	P	P	P	P	0	NM_080668	NM_080668	Hs.434886	cell division cycle associated 5	ENST00000275517	THC2465959	GO:0000082(G1/S transition of mitotic cell cycle)|GO:0000278(mitotic cell cycle)|GO:0000775(chromosome, centromeric region)|GO:0000790(nuclear chromatin)|GO:0003682(chromatin binding)|GO:0005515(protein binding)|GO:0005634(nucleus)|GO:0005654(nucleoplasm)|GO:0005694(chromosome)|GO:0005737(cytoplasm)|GO:0005829(cytosol)|GO:0005886(plasma membrane)|GO:0006302(double-strand break repair)|GO:0007064(…	Homo sapiens cell division cycle associated 5 (CDCA5), mRNA [NM_080668]	chr11:64845055-64844996	hs|11q13.1	TCACCAGATGATGCAGAGTTGAGATCATCATTGCAAAGTTCTCTGTTCCTGAGGAACTAA
A_23_P104804	ZBTB16	7704	NM_006006	22.4703	7.68524	13.2049	7.55944	5.76145	10.2514	5.92376	9.64677	58.5222	1269.67	48.3901	774.64	P	P	P	P	0	NM_006006	NM_006006	Hs.591945	zinc finger and BTB domain containing 16	ENST00000539918	THC2470831	GO:0000122(negative regulation of transcription from RNA polymerase II promoter)|GO:0000980(RNA polymerase II distal enhancer sequence-specific DNA binding)|GO:0001206(RNA polymerase II distal enhancer sequence-specific DNA binding transcription factor activity involved in negative regulation of transcription)|GO:0001823(mesonephros development)|GO:0003677(DNA binding)|GO:0003690(double-stranded …	Homo sapiens zinc finger and BTB domain containing 16 (ZBTB16), transcript variant 1, mRNA [NM_006006]	chr11:114117992-114118051	hs|11q23.2	GCATCCACACGGGTGAGAAACCCTACGAGTGCAATGGCTGTGGCAAGAAGTTCAGCCTCA
A_23_P104876	SPA17	53340	NM_017425	-6.84775	6.92291	-2.54801	6.92141	8.44846	5.67283	7.6289	6.27954	403.337	60.685	155.391	76.8723	P	P	P	P	0	NM_017425	NM_017425	Hs.286233	sperm autoantigenic protein 17	ENST00000524614	THC2471715	GO:0003351(epithelial cilium movement)|GO:0005516(calmodulin binding)|GO:0005737(cytoplasm)|GO:0007283(spermatogenesis)|GO:0007338(single fertilization)|GO:0007339(binding of sperm to zona pellucida)|GO:0016020(membrane)|GO:0031514(motile cilium)|GO:0072372(primary cilium)	Homo sapiens sperm autoantigenic protein 17 (SPA17), mRNA [NM_017425]	chr11:124561634-124564213	hs|11q24.2	TCTCAGATATCTGGGAAGGAGGAAGAGACATCAGTCACCATCTTAGACTCTTCTGAGGAA
A_23_P105012	HRASLS2	54979	NM_017878	-2.97145	8.94373	4.34383	6.73308	9.76375	8.19259	5.75645	7.87542	1068.5	327.068	43.051	233.874	P	P	P	P	0	NM_017878	NM_017878	Hs.272805	HRAS-like suppressor 2	ENST00000255695	THC2481921	GO:0005737(cytoplasm)|GO:0016021(integral to membrane)|GO:0016042(lipid catabolic process)|GO:0016746(transferase activity, transferring acyl groups)|GO:0016787(hydrolase activity)	Homo sapiens HRAS-like suppressor 2 (HRASLS2), mRNA [NM_017878]	chr11:63320383-63320324	hs|11q12.3	GCCAGCAGGAGTGGAGTTTGGTTTACTGATTTTACTGTTTTGTGTTCATGAATCTTTATT
A_23_P105307	DGKA	1606	NM_201444	7.5714	10.4865	3.44476	10.2459	9.12737	12.0479	9.39248	11.1769	670.157	4214.19	531.665	2211.54	P	P	P	P	0	NM_201444	NM_201444	Hs.524488	diacylglycerol kinase, alpha 80kDa	ENST00000550957	THC2764478	GO:0003951(NAD+ kinase activity)|GO:0004143(diacylglycerol kinase activity)|GO:0005509(calcium ion binding)|GO:0005524(ATP binding)|GO:0005543(phospholipid binding)|GO:0005829(cytosol)|GO:0005886(plasma membrane)|GO:0007205(protein kinase C-activating G-protein coupled receptor signaling pathway)|GO:0007596(blood coagulation)|GO:0016020(membrane)|GO:0016310(phosphorylation)|GO:0030168(platelet ac…	Homo sapiens diacylglycerol kinase, alpha 80kDa (DGKA), transcript variant 1, mRNA [NM_201444]	chr12:56346854-56346913	hs|12q13.2	GGCTGGAGGGTGCAATTGAGATGGGCCAAATCTATACCAAGCTCAAGAATGCTGGACGTC
A_23_P105747	APPL2	55198	NM_018171	3.5679	7.0806	4.47753	7.46847	6.22226	8.05734	6.46499	8.6277	81.1997	299.175	70.5701	389.52	P	P	P	P	0	NM_018171	NM_018171	Hs.506603	adaptor protein, phosphotyrosine interaction, PH domain and leucine zipper containing 2	ENST00000547790	THC2676804	GO:0005515(protein binding)|GO:0005634(nucleus)|GO:0005737(cytoplasm)|GO:0007049(cell cycle)|GO:0007165(signal transduction)|GO:0008283(cell proliferation)|GO:0010008(endosome membrane)|GO:0016581(NuRD complex)|GO:0031901(early endosome membrane)|GO:0070062(extracellular vesicular exosome)	Homo sapiens adaptor protein, phosphotyrosine interaction, PH domain and leucine zipper containing 2 (APPL2), transcript variant 1, mRNA [NM_018171]	chr12:105568002-105567943	hs|12q23.3	GATTTCCGAAGGCTGACAATCGTTTGTGGAATGTAATCTTGATGCCTTGATACTGAGACT
A_23_P10591	METRNL	284207	NM_001004431	28.1178	10.4673	161.841	10.7395	8.33376	13.1472	7.67977	15.0182	371.133	8829.35	161.476	30005	P	P	P	P	0	NM_001004431	NM_001004431	Hs.378821	meteorin, glial cell differentiation regulator-like	ENST00000320095	THC2775842	GO:0003674(molecular_function)|GO:0005179(hormone activity)|GO:0005615(extracellular space)|GO:0009409(response to cold)|GO:0014850(response to muscle activity)|GO:0045444(fat cell differentiation)|GO:0050728(negative regulation of inflammatory response)|GO:0050873(brown fat cell differentiation)|GO:0070062(extracellular vesicular exosome)|GO:0090336(positive regulation of brown fat cell differen…	Homo sapiens meteorin, glial cell differentiation regulator-like (METRNL), mRNA [NM_001004431]	chr17:81052490-81052549	hs|17q25.3	AGCTTCCAGCCAAGGATGCCCTGGCCGATTGGAAATGCTGTAAAATGCAAACTAAGTTAT
A_23_P105957	ACTN1	87	NM_001102	6.74312	9.82279	4.57855	10.7557	8.54209	11.2955	9.71406	11.909	432.041	2572.69	670.384	3649.36	P	P	P	P	0	NM_001102	NM_001102	Hs.509765	actinin, alpha 1	ENST00000438964	THC2518567	GO:0001725(stress fiber)|GO:0001726(ruffle)|GO:0002576(platelet degranulation)|GO:0003725(double-stranded RNA binding)|GO:0005178(integrin binding)|GO:0005509(calcium ion binding)|GO:0005515(protein binding)|GO:0005576(extracellular region)|GO:0005615(extracellular space)|GO:0005634(nucleus)|GO:0005737(cytoplasm)|GO:0005829(cytosol)|GO:0005886(plasma membrane)|GO:0005916(fascia adherens)|GO:00059…	Homo sapiens actinin, alpha 1 (ACTN1), transcript variant 2, mRNA [NM_001102]	chr14:69343826-69341703	hs|14q24.1	TTCCTTCAAGATCCTGGCTGGGGACAAGAACTACATTACCATGGACGAGCTGCGCCGCGA
A_23_P106158	L2HGDH	79944	NM_024884	-2.45108	6.89473	-4.98724	6.679	7.5717	6.27829	7.93796	5.61971	214.022	89.9406	193.877	48.5799	P	P	P	P	0	NM_024884	NM_024884	Hs.256034	L-2-hydroxyglutarate dehydrogenase	ENST00000261699	NP335790	GO:0005739(mitochondrion)|GO:0005743(mitochondrial inner membrane)|GO:0006103(2-oxoglutarate metabolic process)|GO:0016021(integral to membrane)|GO:0031305(integral to mitochondrial inner membrane)|GO:0044237(cellular metabolic process)|GO:0044267(cellular protein metabolic process)|GO:0044281(small molecule metabolic process)|GO:0047545(2-hydroxyglutarate dehydrogenase activity)|GO:0055114(oxida…	Homo sapiens L-2-hydroxyglutarate dehydrogenase (L2HGDH), mRNA [NM_024884]	chr14:50734549-50734490	hs|14q21.3	CAGTTCTTGCCTTTAAACGAGAGGGTTACAGACCCTTTGACTTCAGTGCCACAGATGTTA
A_23_P106194	FOS	2353	NM_005252	397.414	9.25703	526.909	10.3533	5.89702	14.5315	6.77656	15.818	64.5111	22324.3	87.5192	52141.3	P	P	P	P	0	NM_005252	NM_005252	Hs.25647	FBJ murine osteosarcoma viral oncogene homolog	ENST00000303562	THC2544585	GO:0000979(RNA polymerase II core promoter sequence-specific DNA binding)|GO:0001661(conditioned taste aversion)|GO:0002224(toll-like receptor signaling pathway)|GO:0002755(MyD88-dependent toll-like receptor signaling pathway)|GO:0002756(MyD88-independent toll-like receptor signaling pathway)|GO:0003690(double-stranded DNA binding)|GO:0003700(sequence-specific DNA binding transcription factor act…	Homo sapiens FBJ murine osteosarcoma viral oncogene homolog (FOS), mRNA [NM_005252]	chr14:75748214-75748273	hs|14q24.3	AGAGGGTTCCTGTAGACCTAGGGAGGACCTTATCTGTGCGTGAAACACACCAGGCTGTGG
A_23_P106204	GSTZ1	2954	NM_145870	-3.90124	9.12755	-4.59198	9.12832	10.1622	8.19825	10.2939	8.09474	1429.85	327.773	1001.37	273.268	P	P	P	P	0	NM_145870	NM_145870	Hs.655292	glutathione S-transferase zeta 1	ENST00000361389	THC2511960	GO:0004364(glutathione transferase activity)|GO:0004602(glutathione peroxidase activity)|GO:0005515(protein binding)|GO:0005739(mitochondrion)|GO:0005829(cytosol)|GO:0006559(L-phenylalanine catabolic process)|GO:0006572(tyrosine catabolic process)|GO:0006749(glutathione metabolic process)|GO:0006805(xenobiotic metabolic process)|GO:0016034(maleylacetoacetate isomerase activity)|GO:0034641(cellula…	Homo sapiens glutathione S-transferase zeta 1 (GSTZ1), transcript variant 1, mRNA [NM_145870]	chr14:77797434-77797493	hs|14q24.3	TACCCTACCATCAGCTCCATCAACAAGAGGCTGCTGGTCTTGGAGGCCTTCCAGGTGTCT
A_23_P106389	SEMA7A	8482	NM_003612	-27.626	7.79143	-41.0976	9.52267	10.5449	5.75694	12.5732	7.21225	1892.8	63.7945	4915.21	148.219	P	P	P	P	0	NM_003612	NM_003612	Hs.24640	semaphorin 7A, GPI membrane anchor (John Milton Hagen blood group)	ENST00000542748	THC2466311	GO:0001649(osteoblast differentiation)|GO:0001934(positive regulation of protein phosphorylation)|GO:0004872(receptor activity)|GO:0005178(integrin binding)|GO:0005515(protein binding)|GO:0005886(plasma membrane)|GO:0006954(inflammatory response)|GO:0006955(immune response)|GO:0007229(integrin-mediated signaling pathway)|GO:0007411(axon guidance)|GO:0009897(external side of plasma membrane)|GO:00…	Homo sapiens semaphorin 7A, GPI membrane anchor (John Milton Hagen blood group) (SEMA7A), transcript variant 1, mRNA [NM_003612]	chr15:74702424-74702365	hs|15q24.1	GCCTTGCATGTTTATTGAAGGATGTTTGCTTTCCGGACGGAAGGACGGAAAAAGCTCTAT
A_23_P106433	RCCD1	91433	NM_033544	-4.88429	9.80813	-1.92593	9.03744	11.0187	8.73055	9.52257	8.57702	2672.25	463.283	581.223	378.23	P	P	P	P	0	NM_033544	NM_033544	Hs.655895	RCC1 domain containing 1	ENST00000557266	THC2493980	GO:0005737(cytoplasm)|GO:0005886(plasma membrane)	Homo sapiens RCC1 domain containing 1 (RCCD1), transcript variant 1, mRNA [NM_033544]	chr15:91505419-91505478	hs|15q26.1	TTGCTTTTGAGTGTTAGATAAATGGAATCCTGTGTATGTGCTTTTGTGTCGTTTTTGTCA
A_23_P106661	CMTM1	113540	NM_052999	3.88508	7.1092	10.3983	6.20283	6.19732	8.15526	4.73957	8.11785	79.6736	319.108	21.5211	277.029	P	P	P	P	0	NM_052999	NM_052999	Hs.698621	CKLF-like MARVEL transmembrane domain containing 1	ENST00000479381	NP813866	GO:0005125(cytokine activity)|GO:0005615(extracellular space)|GO:0006935(chemotaxis)|GO:0016021(integral to membrane)	Homo sapiens CKLF-like MARVEL transmembrane domain containing 1 (CMTM1), transcript variant 17, mRNA [NM_052999]	chr16:66612972-66613031	hs|16q21	TCGCATGCTGTCACCCATTCCAGCCTAAATGTGACCATAAAATTAGGGCTGCTGCTTTTA
A_23_P106675	PLCG2	5336	NM_002661	-3.62269	11.941	-7.0898	12.5129	12.9056	11.0486	14.0053	11.1796	10371.3	2187.64	13593	2214.36	P	P	P	P	0	NM_002661	NM_002661	Hs.413111	phospholipase C, gamma 2 (phosphatidylinositol-specific)	ENST00000564138	THC2464263	GO:0002316(follicular B cell differentiation)|GO:0004435(phosphatidylinositol phospholipase C activity)|GO:0004629(phospholipase C activity)|GO:0004871(signal transducer activity)|GO:0005515(protein binding)|GO:0005829(cytosol)|GO:0005886(plasma membrane)|GO:0006661(phosphatidylinositol biosynthetic process)|GO:0007596(blood coagulation)|GO:0009395(phospholipid catabolic process)|GO:0010468(regul…	Homo sapiens phospholipase C, gamma 2 (phosphatidylinositol-specific) (PLCG2), mRNA [NM_002661]	chr16:81991575-81991634	hs|16q23.3	GAGTCAGCAACAGCAAGTTTTACTCATAGAAGCTGGGGTATGTGTGTAAGGGTATTGTGT
A_23_P106773	SULT1A2	6799	NM_177528	6.94131	10.0534	5.94632	11.2921	8.75249	11.5477	10.0791	12.6511	509.374	3025.71	863.281	5994.82	P	P	P	P	0	NM_177528	NM_177528	Hs.546304	sulfotransferase family, cytosolic, 1A, phenol-preferring, member 2	ENST00000395630	THC2495029	GO:0004062(aryl sulfotransferase activity)|GO:0005829(cytosol)|GO:0006584(catecholamine metabolic process)|GO:0006805(xenobiotic metabolic process)|GO:0008146(sulfotransferase activity)|GO:0008202(steroid metabolic process)|GO:0009309(amine biosynthetic process)|GO:0018958(phenol-containing compound metabolic process)|GO:0044281(small molecule metabolic process)|GO:0047894(flavonol 3-sulfotransfe…	Homo sapiens sulfotransferase family, cytosolic, 1A, phenol-preferring, member 2 (SULT1A2), transcript variant 2, mRNA [NM_177528]	chr16:28603326-28603267	hs|16p11.2	AGAGGGAGTGTGCGAATCAAGCCTGACCAAGAGGCTCCAGAATAAAGTATGATTTGTGTT
A_23_P106835	BBS2	583	NM_031885	4.74588	9.18777	2.95252	8.96362	8.13285	10.3795	8.21661	9.77856	317.081	1390.74	235.063	841.607	P	MP	MP	MP	0	NM_031885	NM_031885	Hs.333738	Bardet-Biedl syndrome 2	ENST00000562813	THC2584789	GO:0001103(RNA polymerase II repressing transcription factor binding)|GO:0005515(protein binding)|GO:0005829(cytosol)|GO:0006996(organelle organization)|GO:0007288(sperm axoneme assembly)|GO:0007601(visual perception)|GO:0008104(protein localization)|GO:0010629(negative regulation of gene expression)|GO:0014824(artery smooth muscle contraction)|GO:0021756(striatum development)|GO:0021766(hippocam…	Homo sapiens Bardet-Biedl syndrome 2 (BBS2), mRNA [NM_031885]	chr16:56518692-56518633	hs|16q12.2	TGGGGACAGCTTCTTCCTAGGTGAGGAAAATACAGGTCATGAAGTTCCTGGCAAAGATTT
A_23_P107421	TK1	7083	NM_003258	-25.1623	12.4621	-23.6324	11.7999	15.004	10.3508	14.2998	9.73708	44063.6	1359.68	16925.2	816.606	P	P	P	P	0	NM_003258	NM_003258	Hs.515122	thymidine kinase 1, soluble	ENST00000301634	THC2490776	GO:0001889(liver development)|GO:0004797(thymidine kinase activity)|GO:0005524(ATP binding)|GO:0005829(cytosol)|GO:0006139(nucleobase-containing compound metabolic process)|GO:0006206(pyrimidine base metabolic process)|GO:0008270(zinc ion binding)|GO:0009157(deoxyribonucleoside monophosphate biosynthetic process)|GO:0009165(nucleotide biosynthetic process)|GO:0009636(response to toxin)|GO:0014856…	Homo sapiens thymidine kinase 1, soluble (TK1), mRNA [NM_003258]	chr17:76170252-76170193	hs|17q25.3	AGGGGCTTATCTCTTCAAGTGTGGAGAGGGCAGGGTCCACGCCTCTGCTGTAGCTTATGA
A_23_P10743	PDE6B	5158	NM_000283	4.62956	6.23668	-1.59758	7.53014	5.22846	7.43933	7.87566	7.19977	40.488	197.264	185.479	147.022	P	P	P	P	0	NM_000283	NM_000283	Hs.654544	phosphodiesterase 6B, cGMP-specific, rod, beta	ENST00000496514	THC2740163	GO:0005886(plasma membrane)|GO:0007601(visual perception)|GO:0007603(phototransduction, visible light)|GO:0016056(rhodopsin mediated signaling pathway)|GO:0022400(regulation of rhodopsin mediated signaling pathway)|GO:0046037(GMP metabolic process)|GO:0046872(metal ion binding)|GO:0047555(3',5'-cyclic-GMP phosphodiesterase activity)|GO:0051480(cytosolic calcium ion homeostasis)|GO:0060041(retina …	Homo sapiens phosphodiesterase 6B, cGMP-specific, rod, beta (PDE6B), transcript variant 1, mRNA [NM_000283]	chr4:663873-663932	hs|4p16.3	TCTTCAACCTGCTGTATCCTGTGAGCACTGGTCCCATGGGGACCCTATGGCTCCCTCAAT
A_23_P107513	CEP76	79959	NM_024899	-3.05301	7.94881	-4.4676	7.10024	8.7946	7.18437	8.26162	6.10212	524.733	165.974	241.31	68.2794	P	P	P	P	0	NM_024899	NM_024899	Hs.236940	centrosomal protein 76kDa	ENST00000423709	THC2607581	GO:0000086(G2/M transition of mitotic cell cycle)|GO:0000278(mitotic cell cycle)|GO:0005515(protein binding)|GO:0005813(centrosome)|GO:0005814(centriole)|GO:0005829(cytosol)|GO:0006996(organelle organization)|GO:0043234(protein complex)|GO:0046599(regulation of centriole replication)	Homo sapiens centrosomal protein 76kDa (CEP76), transcript variant 1, mRNA [NM_024899]	chr18:12674543-12673452	hs|18p11.21	ATGTCTTCGATCTCCTTTCTGTGAAGAAATAATCTGTTGCCGTGGAGACCAAGTGCGACT
A_23_P108501	EPHA4	2043	NM_004438	-1.35479	9.12162	22.4615	6.70902	9.34328	8.90521	4.82988	9.31927	783.987	521.316	22.9219	619.092	P	P	P	P	0	NM_004438	NM_004438	Hs.371218	EPH receptor A4	ENST00000424339	THC2466360	GO:0004672(protein kinase activity)|GO:0005004(GPI-linked ephrin receptor activity)|GO:0005005(transmembrane-ephrin receptor activity)|GO:0005515(protein binding)|GO:0005524(ATP binding)|GO:0005737(cytoplasm)|GO:0005741(mitochondrial outer membrane)|GO:0005783(endoplasmic reticulum)|GO:0005794(Golgi apparatus)|GO:0005886(plasma membrane)|GO:0005887(integral to plasma membrane)|GO:0007155(cell adh…	Homo sapiens EPH receptor A4 (EPHA4), mRNA [NM_004438]	chr2:222290776-222290717	hs|2q36.1	AGATGCACGGCAGAATGGTTCCCGTCTGAGCCAGTACTGAATAAACTCAAAACTCTTGAA
A_23_P108751	FHL2	2274	NM_001039492	-3.53174	9.10372	-7.6937	8.69428	10.0593	8.23892	10.2898	7.34615	1327.66	336.321	998.403	162.506	P	P	P	P	0	NM_001039492	NM_001039492	Hs.443687	four and a half LIM domains 2	ENST00000358129	NP1180779	GO:0000122(negative regulation of transcription from RNA polymerase II promoter)|GO:0001649(osteoblast differentiation)|GO:0003713(transcription coactivator activity)|GO:0005515(protein binding)|GO:0005634(nucleus)|GO:0005654(nucleoplasm)|GO:0005925(focal adhesion)|GO:0006351(transcription, DNA-dependent)|GO:0008134(transcription factor binding)|GO:0008270(zinc ion binding)|GO:0009725(response to…	Homo sapiens four and a half LIM domains 2 (FHL2), transcript variant 5, mRNA [NM_001039492]	chr2:105977361-105977302	hs|2q12.1	TTTACAGCTCTGTAACCTCCCGTTGCGTCAAGTCTAAACCAAGATTATGTGACTTGCAAT
A_23_P108835	YPEL5	51646	NM_016061	4.35899	11.8482	3.76178	13.1473	10.8337	12.9577	12.2263	14.1377	2333.28	7769.01	3816.35	16345.5	P	P	P	P	0	NM_016061	NM_016061	Hs.515890	yippee-like 5 (Drosophila)	ENST00000379520	THC2470088		Homo sapiens yippee-like 5 (Drosophila) (YPEL5), transcript variant 4, mRNA [NM_016061]	chr2:30383128-30383187	hs|2p23.1	AAAGTGACTTCTGAGTACAGTTAAGTTCCTCCTATTTGCCACTGGGCTGTTGGTTAGAAG
A_23_P108948	MREG	55686	NM_018000	-5.5918	8.77628	-9.91538	8.82741	10.1053	7.62202	10.636	7.32634	1373.93	223.629	1262.81	160.592	P	P	P	P	0	NM_018000	NM_018000	Hs.620391	melanoregulin	ENST00000620139	NP488475	GO:0016324(apical plasma membrane)|GO:0030318(melanocyte differentiation)|GO:0032402(melanosome transport)|GO:0042470(melanosome)|GO:0043234(protein complex)	Homo sapiens melanoregulin (MREG), mRNA [NM_018000]	chr2:216808159-216808100	hs|2q35	TCATGCAGACTTGCACATATGCAGGGAGTATTGCACTGAAGATCTTTGCTGGACCTTCTT
A_23_P109143	PRNP	5621	NM_000311	4.00146	11.2251	6.95448	11.511	10.2694	12.2699	10.1968	12.9947	1551.1	4924.82	938.821	7602.9	P	P	P	P	0	NM_000311	NM_000311	Hs.472010	prion protein	ENST00000379440	THC2465162	GO:0001933(negative regulation of protein phosphorylation)|GO:0005507(copper ion binding)|GO:0005515(protein binding)|GO:0005634(nucleus)|GO:0005737(cytoplasm)|GO:0005741(mitochondrial outer membrane)|GO:0005783(endoplasmic reticulum)|GO:0005794(Golgi apparatus)|GO:0005886(plasma membrane)|GO:0006878(cellular copper ion homeostasis)|GO:0006979(response to oxidative stress)|GO:0007050(cell cycle a…	Homo sapiens prion protein (PRNP), transcript variant 1, mRNA [NM_000311]	chr20:4681923-4681982	hs|20p13	TATATATTGCATAGGACAGACTTAGGAGTTTTGTTTAGAGCAGTTAACATCTGAAGTGTC
A_23_P109488	PIK3IP1	113791	NM_052880	33.8155	7.3847	8.48028	8.7052	5.26944	10.3491	7.29867	10.3828	41.634	1358.35	123.808	1275.73	P	P	P	P	0	NM_052880	NM_052880	Hs.26670	phosphoinositide-3-kinase interacting protein 1	ENST00000402249	THC2511528	GO:0005886(plasma membrane)|GO:0014067(negative regulation of phosphatidylinositol 3-kinase cascade)|GO:0016021(integral to membrane)|GO:0043553(negative regulation of phosphatidylinositol 3-kinase activity)|GO:0070062(extracellular vesicular exosome)	Homo sapiens phosphoinositide-3-kinase interacting protein 1 (PIK3IP1), transcript variant 1, mRNA [NM_052880]	chr22:31685561-31685502	hs|22q12.2	AGCTGTGCAGCCAGTGATTGGGATCAGCCAGCGGGTGCGGATGAACTCCAAGGAGAAAAA
A_23_P109881	ITIH4	3700	NM_002218	5.58408	9.75265	1.20649	11.1705	8.59059	11.0719	11.0359	11.3067	447.419	2220.7	1651.85	2421.55	P	P	P	P	0	NM_002218	NM_002218	Hs.709406	inter-alpha-trypsin inhibitor heavy chain family, member 4	ENST00000464000	NP1161208	GO:0004866(endopeptidase inhibitor activity)|GO:0004867(serine-type endopeptidase inhibitor activity)|GO:0005515(protein binding)|GO:0005576(extracellular region)|GO:0005737(cytoplasm)|GO:0005886(plasma membrane)|GO:0006953(acute-phase response)|GO:0010951(negative regulation of endopeptidase activity)|GO:0030212(hyaluronan metabolic process)|GO:0034097(response to cytokine stimulus)|GO:0070062(e…	Homo sapiens inter-alpha-trypsin inhibitor heavy chain family, member 4 (ITIH4), transcript variant 1, mRNA [NM_002218]	chr3:52847378-52847319	hs|3p21.1	GCCGCTTCTGGGGCCTGGACCACCATGGGGAGGAAGAGTCCCACTCATTACAAATAAAGA
A_23_P110184	MSMO1	6307	NM_006745	-6.14543	6.50702	-6.74301	6.13521	7.94729	5.32777	7.66447	4.91108	278.068	47.5256	159.876	30.0266	P	P	P	P	0	NM_006745	NM_006745	Hs.105269	methylsterol monooxygenase 1	ENST00000393766	THC2469190	GO:0000254(C-4 methylsterol oxidase activity)|GO:0005506(iron ion binding)|GO:0005783(endoplasmic reticulum)|GO:0005789(endoplasmic reticulum membrane)|GO:0005886(plasma membrane)|GO:0006631(fatty acid metabolic process)|GO:0006633(fatty acid biosynthetic process)|GO:0006695(cholesterol biosynthetic process)|GO:0008202(steroid metabolic process)|GO:0016021(integral to membrane)|GO:0044281(small m…	Homo sapiens methylsterol monooxygenase 1 (MSMO1), transcript variant 1, mRNA [NM_006745]	chr4:166263190-166263249	hs|4q32.3	GTCTTCTGGCTACTAAGTGATAAAAAGAACATTAACAACCTTTAATTACCTTCCTAGTGG
A_23_P110196	HERC5	51191	NM_016323	-4.41319	9.75902	-1.18483	8.67658	10.8885	8.74669	8.79978	8.55511	2431.13	467.781	349.935	372.797	P	P	P	P	0	NM_016323	NM_016323	Hs.26663	HECT and RLD domain containing E3 ubiquitin protein ligase 5	ENST00000502913	THC2472533	GO:0000079(regulation of cyclin-dependent protein kinase activity)|GO:0004842(ubiquitin-protein ligase activity)|GO:0005515(protein binding)|GO:0005634(nucleus)|GO:0005737(cytoplasm)|GO:0005829(cytosol)|GO:0016874(ligase activity)|GO:0019221(cytokine-mediated signaling pathway)|GO:0032020(ISG15-protein conjugation)|GO:0032480(negative regulation of type I interferon production)|GO:0042296(ISG15 l…	Homo sapiens HECT and RLD domain containing E3 ubiquitin protein ligase 5 (HERC5), mRNA [NM_016323]	chr4:89426889-89426948	hs|4q22.1	TGTCCTGAAAGTTGGAATGAAAGAGACCCTATAAGAGCACTGACATGTTTCAGTGTCCTC
A_23_P110212	ACSL1	2180	NM_001995	-1.57076	9.20268	4.36916	10.2126	9.53417	8.88271	9.20421	11.3316	900.306	513.571	464.162	2464.79	P	P	P	P	0	NM_001995	NM_001995	Hs.406678	acyl-CoA synthetase long-chain family member 1	ENST00000281455	THC2512715	GO:0001676(long-chain fatty acid metabolic process)|GO:0004467(long-chain fatty acid-CoA ligase activity)|GO:0005524(ATP binding)|GO:0005739(mitochondrion)|GO:0005741(mitochondrial outer membrane)|GO:0005778(peroxisomal membrane)|GO:0005789(endoplasmic reticulum membrane)|GO:0005886(plasma membrane)|GO:0007584(response to nutrient)|GO:0008610(lipid biosynthetic process)|GO:0014070(response to org…	Homo sapiens acyl-CoA synthetase long-chain family member 1 (ACSL1), transcript variant 1, mRNA [NM_001995]	chr4:185676745-185676732	hs|4q35.1	ACTCGGTTCTCCAGGCCTGATTCCCCGACTCCATCCTTTTTCAGGGTTATTTAAAAATCT
A_23_P110288	GSTCD	79807	NM_024751	-4.18003	6.50187	-2.3363	5.64933	7.61498	5.55147	6.29451	5.07029	219.936	55.7481	63.0606	33.3769	P	P	P	M	0	NM_024751	NM_024751	Hs.161429	glutathione S-transferase, C-terminal domain containing	ENST00000484843	THC2474171	GO:0003674(molecular_function)|GO:0005515(protein binding)|GO:0008150(biological_process)|GO:0070062(extracellular vesicular exosome)	Homo sapiens glutathione S-transferase, C-terminal domain containing (GSTCD), transcript variant 2, mRNA [NM_024751]	chr4:106744140-106744199	hs|4q24	AAGCAGCAACAGTTGAACAACCTTGTCTATGTGGTAACAAATCAGGCCAAACCTGGTGAC
A_23_P11032	SLC9A7	84679	NM_032591	-6.95667	9.15285	-4.48451	9.93837	10.6584	7.85998	11.0796	8.91468	2058.9	262.542	1700.88	478.516	P	P	P	P	0	NM_032591	NM_032591	Hs.91389	solute carrier family 9, subfamily A (NHE7, cation proton antiporter 7), member 7	ENST00000491894	THC2477523	GO:0000139(Golgi membrane)|GO:0005515(protein binding)|GO:0005802(trans-Golgi network)|GO:0006811(ion transport)|GO:0006885(regulation of pH)|GO:0015385(sodium:hydrogen antiporter activity)|GO:0015386(potassium:hydrogen antiporter activity)|GO:0016021(integral to membrane)|GO:0035725(sodium ion transmembrane transport)|GO:0042803(protein homodimerization activity)|GO:0055038(recycling endosome me…	Homo sapiens solute carrier family 9, subfamily A (NHE7, cation proton antiporter 7), member 7 (SLC9A7), transcript variant 2, mRNA [NM_032591]	chrX:46466588-46466529	hs|Xp11.23	CGACCTGACATTGACCTACGGGGACAGCACAGTGACTGCAAATGGCTCCTCAAGTTCGCA
A_23_P110473	NAIP	4671	NM_004536	10.8145	9.47424	24.0768	8.67504	7.9112	11.3461	6.67863	11.2682	271.296	2650.84	82.2686	2359.49	P	P	P	P	0	NM_004536	NM_004536	Hs.654500	NLR family, apoptosis inhibitory protein	ENST00000517649	THC2464586	GO:0004842(ubiquitin-protein ligase activity)|GO:0005515(protein binding)|GO:0005524(ATP binding)|GO:0005634(nucleus)|GO:0005737(cytoplasm)|GO:0005876(spindle microtubule)|GO:0006954(inflammatory response)|GO:0007399(nervous system development)|GO:0009966(regulation of signal transduction)|GO:0016323(basolateral plasma membrane)|GO:0016567(protein ubiquitination)|GO:0043027(cysteine-type endopept…	Homo sapiens NLR family, apoptosis inhibitory protein (NAIP), transcript variant 1, mRNA [NM_004536]	chr5:70264650-70264591	hs|5q13.2	ACCACTTATATTGCTAGCTACATTAAGAATTTCTGAATATGTTACTGAGCTTGCTTGTGG
A_23_P11070	GPR174	84636	NM_032553	4.01434	7.96471	11.0381	6.949	7.02498	9.03014	5.42943	8.89385	144.443	564.516	34.2876	471.675	P	P	P	P	0	NM_032553	NM_032553	Hs.326713	G protein-coupled receptor 174	ENST00000276077	THC2486154	GO:0004930(G-protein coupled receptor activity)|GO:0005886(plasma membrane)|GO:0007186(G-protein coupled receptor signaling pathway)|GO:0016021(integral to membrane)	Homo sapiens G protein-coupled receptor 174 (GPR174), mRNA [NM_032553]	chrX:78427045-78427104	hs|Xq21.1	CAGTCCGTTGTTATGATGACCATTGGCGAGTTGATTGGGTTTGTAACTCCGCTTCTGATT
A_23_P110712	DUSP1	1843	NM_004417	101.768	10.2312	172.773	11.1731	7.42628	14.0954	8.05861	15.4913	192.435	16631.5	210.674	42009.7	P	MP	P	MP	0	NM_004417	NM_004417	Hs.171695	dual specificity phosphatase 1	ENST00000239223	THC2528308	GO:0000188(inactivation of MAPK activity)|GO:0001706(endoderm formation)|GO:0004726(non-membrane spanning protein tyrosine phosphatase activity)|GO:0005515(protein binding)|GO:0005634(nucleus)|GO:0005737(cytoplasm)|GO:0006470(protein dephosphorylation)|GO:0006979(response to oxidative stress)|GO:0008138(protein tyrosine/serine/threonine phosphatase activity)|GO:0008330(protein tyrosine/threonine …	Homo sapiens dual specificity phosphatase 1 (DUSP1), mRNA [NM_004417]	chr5:172195355-172195296	hs|5q35.1	TGTCTACTCCTAGAAGAACCAAATACCTCAATTTTTGTTTTTGAGTACTGTACTATCCTG
A_23_P110791	CSF1R	1436	NM_005211	164.554	10.7956	1140.58	8.81981	7.72478	15.0872	5.0993	15.2548	237.155	32921.4	27.0383	35188.8	P	P	P	P	0	NM_005211	NM_005211	Hs.586219	colony stimulating factor 1 receptor	ENST00000286301	THC2466971	GO:0001934(positive regulation of protein phosphorylation)|GO:0005011(macrophage colony-stimulating factor receptor activity)|GO:0005524(ATP binding)|GO:0005886(plasma membrane)|GO:0005887(integral to plasma membrane)|GO:0006954(inflammatory response)|GO:0007165(signal transduction)|GO:0007169(transmembrane receptor protein tyrosine kinase signaling pathway)|GO:0007275(multicellular organismal de…	Homo sapiens colony stimulating factor 1 receptor (CSF1R), transcript variant 1, mRNA [NM_005211]	chr5:149432920-149432861	hs|5q32	ATCCTAACTAACAGTCACGCCGTGGGATGTCTCTGTCCACATTAAACTAACAGCATTAAT
A_23_P110802	CENPH	64946	NM_022909	-7.04484	8.73113	-4.03788	8.26582	10.2523	7.43569	9.33371	7.32011	1531.46	196.878	509.283	159.857	P	P	P	P	0	NM_022909	NM_022909	Hs.631967	centromere protein H	ENST00000283006	THC2470392	GO:0000278(mitotic cell cycle)|GO:0000776(kinetochore)|GO:0000777(condensed chromosome kinetochore)|GO:0005515(protein binding)|GO:0005634(nucleus)|GO:0005654(nucleoplasm)|GO:0005829(cytosol)|GO:0006334(nucleosome assembly)|GO:0034080(CenH3-containing nucleosome assembly at centromere)|GO:0043515(kinetochore binding)|GO:0051382(kinetochore assembly)|GO:0051383(kinetochore organization)	Homo sapiens centromere protein H (CENPH), mRNA [NM_022909]	chr5:68505649-68505708	hs|5q13.2	TTTACATTTCTGGCAATCTCAACTCTTATTTGGAATACTTCTGTGCATTTGTCTGTCCAC
A_23_P111228	COQ3	51805	NM_017421	-4.37399	7.82069	-3.37589	6.33685	8.95727	6.82832	7.27497	5.5197	590.442	132.355	121.986	45.168	P	P	P	P	0	NM_017421	NM_017421	Hs.713623	coenzyme Q3 methyltransferase	ENST00000369242	THC2464612	GO:0004395(hexaprenyldihydroxybenzoate methyltransferase activity)|GO:0005739(mitochondrion)|GO:0005759(mitochondrial matrix)|GO:0006071(glycerol metabolic process)|GO:0006744(ubiquinone biosynthetic process)|GO:0008171(O-methyltransferase activity)|GO:0008425(2-polyprenyl-6-methoxy-1,4-benzoquinone methyltransferase activity)|GO:0008689(3-demethylubiquinone-9 3-O-methyltransferase activity)|GO:0…	Homo sapiens coenzyme Q3 methyltransferase (COQ3), mRNA [NM_017421]	chr6:99823868-99819457	hs|6q16.2	AACATGTGATTGATCTAGAAACATTTTTACAGTGCTGCTGTCAAGTGTTAAAACCCGGTG
A_23_P111701	GNG11	2791	NM_004126	14.625	10.3856	21.3652	11.3338	8.62921	12.4996	9.33837	13.7556	464.607	5669.94	510.868	12664.1	P	P	MP	P	0	NM_004126	NM_004126	Hs.83381	guanine nucleotide binding protein (G protein), gamma 11	ENST00000248564	THC2462830	GO:0003924(GTPase activity)|GO:0004871(signal transducer activity)|GO:0005834(heterotrimeric G-protein complex)|GO:0005886(plasma membrane)|GO:0006112(energy reserve metabolic process)|GO:0007165(signal transduction)|GO:0007186(G-protein coupled receptor signaling pathway)|GO:0044281(small molecule metabolic process)|GO:0071377(cellular response to glucagon stimulus)	Homo sapiens guanine nucleotide binding protein (G protein), gamma 11 (GNG11), mRNA [NM_004126]	chr7:93555764-93555823	hs|7q21.3	CTTGAGCATGACACTTCTTTCAGTATATTGCTTGATGCTTCAAATAAAGTTTTGTCTTGG
A_23_P111804	PARP12	64761	NM_022750	2.37321	11.4043	9.49556	9.86262	10.7979	12.0448	8.37175	11.619	2275.05	4207.15	260.217	2991.19	P	P	P	P	0	NM_022750	NM_022750	Hs.12646	poly (ADP-ribose) polymerase family, member 12	ENST00000488726	THC2462153	GO:0003950(NAD+ ADP-ribosyltransferase activity)|GO:0005634(nucleus)|GO:0008152(metabolic process)|GO:0046872(metal ion binding)	Homo sapiens poly (ADP-ribose) polymerase family, member 12 (PARP12), transcript variant 1, mRNA [NM_022750]	chr7:139724005-139723946	hs|7q34	TGATTCGGTTTCTCAGAGTCTCATGGCATCATAGTTTTTCCAGAATGACACAGTAGCCAC
A_23_P111811	ING3	54556	NM_019071	1.23985	10.8476	5.10559	10.2962	10.6936	11.0038	9.18707	11.5391	2106.66	2126.19	458.057	2833.62	P	P	P	MP	0	NM_019071	NM_019071	Hs.489811	inhibitor of growth family, member 3	ENST00000427726	THC2463778	GO:0000812(Swr1 complex)|GO:0004402(histone acetyltransferase activity)|GO:0005634(nucleus)|GO:0005654(nucleoplasm)|GO:0005730(nucleolus)|GO:0005737(cytoplasm)|GO:0006325(chromatin organization)|GO:0006351(transcription, DNA-dependent)|GO:0006355(regulation of transcription, DNA-dependent)|GO:0008270(zinc ion binding)|GO:0032777(Piccolo NuA4 histone acetyltransferase complex)|GO:0035064(methylate…	Homo sapiens inhibitor of growth family, member 3 (ING3), transcript variant 1, mRNA [NM_019071]	chr7:120615261-120615320	hs|7q31.31	TCAACAGGTATATTCTGCTGCATGTACTGTACTCCAGAGCTGTTATGTAACACTGTATAT
A_23_P112241	DNAJB5	25822	NM_012266	-3.71782	9.26716	-7.80459	9.33361	10.2627	8.36821	10.9327	7.9684	1540.87	367.757	1539.32	250.112	P	P	P	P	0	NM_012266	NM_012266	Hs.237506	DnaJ (Hsp40) homolog, subfamily B, member 5	ENST00000541010	THC2462300	GO:0000122(negative regulation of transcription from RNA polymerase II promoter)|GO:0005515(protein binding)|GO:0005634(nucleus)|GO:0005829(cytosol)|GO:0006457(protein folding)|GO:0006986(response to unfolded protein)|GO:0051082(unfolded protein binding)|GO:0051087(chaperone binding)	Homo sapiens DnaJ (Hsp40) homolog, subfamily B, member 5 (DNAJB5), transcript variant 3, mRNA [NM_012266]	chr9:34998281-34998340	hs|9p13.3	GCTGGGGGAAGACTGCTTCAGCCAGATCCTGGGGTGGGGTCTTTAGGTTTTCTCACTTTG
A_23_P112289	TMOD1	7111	NM_003275	-19.6545	7.70135	-29.9252	7.54683	10.1438	5.847	10.3867	5.48341	1410.99	67.7506	1066.71	44.1264	P	P	P	P	0	NM_003275	NM_003275	Hs.404289	tropomodulin 1	ENST00000395211	THC2632497	GO:0005523(tropomyosin binding)|GO:0005829(cytosol)|GO:0005865(striated muscle thin filament)|GO:0006936(muscle contraction)|GO:0007015(actin filament organization)|GO:0008180(signalosome)|GO:0008344(adult locomotory behavior)|GO:0016020(membrane)|GO:0030049(muscle filament sliding)|GO:0030239(myofibril assembly)|GO:0030863(cortical cytoskeleton)|GO:0051015(actin filament binding)|GO:0051694(poin…	Homo sapiens tropomodulin 1 (TMOD1), transcript variant 1, mRNA [NM_003275]	chr9:100362821-100362880	hs|9q22.33	GGGCAAATGGCTTATGTGAGGTAAGACACTAGAGGGATAAATTTCCAGATCAACATGGCT
A_23_P112311	TRIM32	22954	NM_012210	-1.78195	8.08651	-5.64554	7.70254	8.51397	7.68051	9.05163	6.55452	422.871	232.158	416.911	92.9254	P	P	P	P	0	NM_012210	NM_012210	Hs.591910	tripartite motif containing 32	ENST00000450136	THC2463385	GO:0000209(protein polyubiquitination)|GO:0003713(transcription coactivator activity)|GO:0003723(RNA binding)|GO:0004842(ubiquitin-protein ligase activity)|GO:0005515(protein binding)|GO:0005634(nucleus)|GO:0005737(cytoplasm)|GO:0005829(cytosol)|GO:0005863(striated muscle myosin thick filament)|GO:0008270(zinc ion binding)|GO:0009411(response to UV)|GO:0016567(protein ubiquitination)|GO:0016874(l…	Homo sapiens tripartite motif containing 32 (TRIM32), transcript variant 1, mRNA [NM_012210]	chr9:119462472-119462531	hs|9q33.1	AGACATCATATTCCCGTAACATTATGTCTCAGTCTGATCGTCTTTACCAGTATGAAAGTC
A_23_P112341	RMI1	80010	NM_024945	-2.76479	9.98731	-4.10367	8.98747	10.7478	9.28063	10.0635	8.02654	2192.6	673.711	855.36	261.126	P	P	P	MP	0	NM_024945	NM_024945	Hs.726327	RecQ mediated genome instability 1	ENST00000325875	THC2462880	GO:0002023(reduction of food intake in response to dietary excess)|GO:0005515(protein binding)|GO:0005634(nucleus)|GO:0005654(nucleoplasm)|GO:0006260(DNA replication)|GO:0009749(response to glucose stimulus)|GO:0035264(multicellular organism growth)|GO:0042593(glucose homeostasis)	Homo sapiens RecQ mediated genome instability 1 (RMI1), mRNA [NM_024945]	chr9:86618846-86618905	hs|9q21.32	AAAGAGGGACTGTTTACCATTCTTCCACTGTGCTGTTATAAAGTTGTATTTGAAAGGTAA
A_23_P112482	AQP3	360	NM_004925	10.4516	7.72754	4.94997	8.14591	6.21796	9.60361	7.0735	9.38092	80.9069	828.612	106.605	644.913	P	P	P	P	0	NM_004925	NM_004925	Hs.234642	aquaporin 3 (Gill blood group)	ENST00000494313	THC2604824	GO:0002684(positive regulation of immune system process)|GO:0003091(renal water homeostasis)|GO:0005215(transporter activity)|GO:0005737(cytoplasm)|GO:0005886(plasma membrane)|GO:0005887(integral to plasma membrane)|GO:0005911(cell-cell junction)|GO:0006810(transport)|GO:0006833(water transport)|GO:0007588(excretion)|GO:0009992(cellular water homeostasis)|GO:0015204(urea transmembrane transporter…	Homo sapiens aquaporin 3 (Gill blood group) (AQP3), mRNA [NM_004925]	chr9:33441824-33441765	hs|9p13.3	AATTTGGGTCAATACATCCTTTTGTCTCCCAAGGGAAGAGAATGGGCAGCAGGTATGTGT
A_23_P112774	PTP4A3	11156	NM_032611	-2.59926	8.84731	-10.1643	9.58649	9.56315	8.18505	11.4041	8.05861	918.736	325.503	2141.21	266.676	P	P	P	P	0	NM_032611	NM_032611	Hs.744870	protein tyrosine phosphatase type IVA, member 3	ENST00000520105	THC2463792	GO:0004727(prenylated protein tyrosine phosphatase activity)|GO:0005769(early endosome)|GO:0005886(plasma membrane)|GO:0035335(peptidyl-tyrosine dephosphorylation)|GO:0043542(endothelial cell migration)	Homo sapiens protein tyrosine phosphatase type IVA, member 3 (PTP4A3), transcript variant 1, mRNA [NM_032611]	chr8:142441433-142441492	hs|8q24.3	TCCCACACCAGCCAGGCTGGTCTCCTCTAGCCTGTTTGTTGTGGGGTGGGGGTATATTTT
A_23_P113283	ZMAT3	64393	NM_022470	-3.36417	8.39457	-6.52356	8.62116	9.31519	7.56494	10.0795	7.37383	768.7	215.149	863.455	165.656	P	P	P	P	0	NM_022470	NM_022470	Hs.371609	zinc finger, matrin-type 3	ENST00000432729	THC2472596	GO:0005515(protein binding)|GO:0005730(nucleolus)|GO:0006915(apoptotic process)|GO:0006974(response to DNA damage stimulus)|GO:0008270(zinc ion binding)|GO:0015031(protein transport)|GO:0040008(regulation of growth)|GO:0043065(positive regulation of apoptotic process)	Homo sapiens zinc finger, matrin-type 3 (ZMAT3), transcript variant 1, mRNA [NM_022470]	chr3:178742220-178742161	hs|3q26.32	ATTGAATTCTTTTTAGATCTAAGTAAAAATAGGTCAGCAGAGATTTCAGTTTCCCAGGGC
A_23_P113825	NACC2	138151	NM_144653	4.42521	9.30773	56.2784	8.30414	8.29649	10.4422	5.89109	11.7056	360.33	1450.3	47.2175	3177.61	P	P	P	P	0	NM_144653	NM_144653	Hs.112895	NACC family member 2, BEN and BTB (POZ) domain containing	ENST00000277554	THC2472845	GO:0000790(nuclear chromatin)|GO:0000978(RNA polymerase II core promoter proximal region sequence-specific DNA binding)|GO:0001076(RNA polymerase II transcription factor binding transcription factor activity)|GO:0001078(RNA polymerase II core promoter proximal region sequence-specific DNA binding transcription factor activity involved in negative regulation of transcription)|GO:0004407(histone de…	Homo sapiens NACC family member 2, BEN and BTB (POZ) domain containing (NACC2), mRNA [NM_144653]	chr9:138903283-138903224	hs|9q34.3	GCCACTTACCTACTGAACTGCTACTGTTGCCTGAGAAAAATGTGATTTTTATTCTGCTTG
A_23_P114232	PRDX4	10549	NM_006406	-5.78926	13.078	-2.97846	12.1563	14.4059	11.8725	12.969	11.3944	29430.3	3755.69	6534.68	2574.79	P	P	P	P	0	NM_006406	NM_006406	Hs.83383	peroxiredoxin 4	ENST00000379341	THC2468870	GO:0005515(protein binding)|GO:0005615(extracellular space)|GO:0005634(nucleus)|GO:0005739(mitochondrion)|GO:0005790(smooth endoplasmic reticulum)|GO:0005829(cytosol)|GO:0007252(I-kappaB phosphorylation)|GO:0007283(spermatogenesis)|GO:0008379(thioredoxin peroxidase activity)|GO:0008584(male gonad development)|GO:0019471(4-hydroxyproline metabolic process)|GO:0022417(protein maturation by protein …	Homo sapiens peroxiredoxin 4 (PRDX4), mRNA [NM_006406]	chrX:23700566-23700625	hs|Xp22.11	ATCTTCCTGTGGGTAGATCAGTGGATGAGACACTACGTTTGGTTCAAGCATTCCAGTACA
A_23_P114299	CXCR3	2833	NM_001504	7.32194	10.9282	8.36057	9.46173	9.58603	12.4583	8.05312	11.1167	936.79	5492.55	209.829	2119.86	P	P	P	P	0	NM_001504	NM_001504	Hs.198252	chemokine (C-X-C motif) receptor 3	ENST00000373691	THC2477006	GO:0001525(angiogenesis)|GO:0001937(negative regulation of endothelial cell proliferation)|GO:0002685(regulation of leukocyte migration)|GO:0004872(receptor activity)|GO:0004950(chemokine receptor activity)|GO:0005737(cytoplasm)|GO:0005886(plasma membrane)|GO:0005887(integral to plasma membrane)|GO:0006915(apoptotic process)|GO:0006928(cellular component movement)|GO:0006935(chemotaxis)|GO:000695…	Homo sapiens chemokine (C-X-C motif) receptor 3 (CXCR3), transcript variant 1, mRNA [NM_001504]	chrX:70835866-70835807	hs|Xq13.1	GTGACTGTGGCCATGGTCCCCAAGACCTCTATATTTGCTCTTTTATTTTTATGTCTAAAA
A_23_P114466	TBL1Y	90665	NM_033284	1.04829	8.71797	4.91096	8.05767	8.68402	8.75206	6.99104	9.28704	484.448	469.318	100.933	606.618	P	P	P	P	0	NM_033284	NM_033284	Hs.664560	transducin (beta)-like 1, Y-linked	ENST00000624573	NP447325	GO:0000118(histone deacetylase complex)|GO:0003714(transcription corepressor activity)|GO:0006351(transcription, DNA-dependent)|GO:0006357(regulation of transcription from RNA polymerase II promoter)|GO:0016575(histone deacetylation)	Homo sapiens transducin (beta)-like 1, Y-linked (TBL1Y), transcript variant 1, mRNA [NM_033284]	chrY:6955393-6955452	hs|Yp11.2	TACAGTGTAGCTTTCAGCCCCGATGGAAAGTACTTGGCTAGTGGATCCTTTGACAAGTAT
A_23_P114774	PMVK	10654	NM_006556	-2.69084	11.7304	-5.30174	11.7299	12.4661	11.0381	12.9947	10.5882	7703.69	2171.33	6643.12	1468.7	P	P	P	P	0	NM_006556	NM_006556	Hs.30954	phosphomevalonate kinase	ENST00000368467	THC2512583	GO:0004631(phosphomevalonate kinase activity)|GO:0005524(ATP binding)|GO:0005777(peroxisome)|GO:0005829(cytosol)|GO:0006695(cholesterol biosynthetic process)|GO:0016020(membrane)|GO:0016126(sterol biosynthetic process)|GO:0016310(phosphorylation)|GO:0019287(isopentenyl diphosphate biosynthetic process, mevalonate pathway)|GO:0044281(small molecule metabolic process)|GO:0070062(extracellular vesic…	Homo sapiens phosphomevalonate kinase (PMVK), mRNA [NM_006556]	chr1:154897457-154897398	hs|1q21.3	CAGGAAACCTCTGGAGACCTCATTTTCTCCATGGGGAAGACAGCCATGCTCTTCAGGAGG
A_23_P114903	HSPA6	3310	NM_002155	35.2088	7.34246	15.091	8.56793	5.20996	10.3478	6.83096	10.7466	40.0173	1355.48	90.5606	1629.67	P	P	P	P	0	NM_002155	NM_002155	Hs.654614	heat shock 70kDa protein 6 (HSP70B')	ENST00000309758	THC2462924	GO:0005524(ATP binding)|GO:0005737(cytoplasm)|GO:0005814(centriole)|GO:0005829(cytosol)|GO:0006200(ATP catabolic process)|GO:0006986(response to unfolded protein)|GO:0008180(signalosome)|GO:0019899(enzyme binding)|GO:0031072(heat shock protein binding)|GO:0034605(cellular response to heat)|GO:0042026(protein refolding)|GO:0042623(ATPase activity, coupled)|GO:0051082(unfolded protein binding)|GO:0…	Homo sapiens heat shock 70kDa protein 6 (HSP70B') (HSPA6), mRNA [NM_002155]	chr1:161577785-161577844	hs|1q23.3	CAAAATGCAAGACAAGTGTCGGGAAGTCCTTGCCTGGCTGGAGCACAACCAGCTGGCAGA
A_23_P114947	RGS2	5997	NM_002923	26.7993	11.7471	273.476	11.5105	9.61212	14.3562	8.15381	16.2491	953.41	19680.1	225.544	69710.2	P	P	P	P	0	NM_002923	NM_002923	Hs.78944	regulator of G-protein signaling 2	ENST00000235382	THC2468539	GO:0005096(GTPase activator activity)|GO:0005515(protein binding)|GO:0005516(calmodulin binding)|GO:0005730(nucleolus)|GO:0005737(cytoplasm)|GO:0005739(mitochondrion)|GO:0005829(cytosol)|GO:0005886(plasma membrane)|GO:0006417(regulation of translation)|GO:0007049(cell cycle)|GO:0007283(spermatogenesis)|GO:0008277(regulation of G-protein coupled receptor protein signaling pathway)|GO:0009898(inter…	Homo sapiens regulator of G-protein signaling 2 (RGS2), mRNA [NM_002923]	chr1:192781051-192781110	hs|1q31.2	TAGATCTGGGATTATGTGGCCTTAGGTAGCTGGTTGTACATCTTTCCCTAAATCGATCCA
A_23_P11543	FUCA1	2517	NM_000147	1.18621	10.1076	-6.45958	11.3628	9.98519	10.2316	12.788	10.0965	1257.6	1254.15	5692.4	1051.43	P	P	P	P	0	NM_000147	NM_000147	Hs.370858	fucosidase, alpha-L- 1, tissue	ENST00000374479	THC2518697	GO:0004560(alpha-L-fucosidase activity)|GO:0005737(cytoplasm)|GO:0005764(lysosome)|GO:0006004(fucose metabolic process)|GO:0006027(glycosaminoglycan catabolic process)|GO:0016139(glycoside catabolic process)|GO:0042806(fucose binding)|GO:0070062(extracellular vesicular exosome)	Homo sapiens fucosidase, alpha-L- 1, tissue (FUCA1), mRNA [NM_000147]	chr1:24171909-24171850	hs|1p36.11	TTCTCTGATAACCTACTTGCTTACTCAATGCCTTTAAGCCAAGTCACCCTGTTGCCTATG
A_23_P115482	UBE2T	29089	NM_014176	-18.7584	11.0735	-15.7574	9.80679	13.3883	9.15884	11.9954	8.01747	14621.9	618.206	3252.96	259.402	P	P	P	P	0	NM_014176	NM_014176	Hs.5199	ubiquitin-conjugating enzyme E2T	ENST00000367274	THC2613200	GO:0003682(chromatin binding)|GO:0004842(ubiquitin-protein ligase activity)|GO:0005524(ATP binding)|GO:0005634(nucleus)|GO:0005654(nucleoplasm)|GO:0005737(cytoplasm)|GO:0006281(DNA repair)|GO:0006513(protein monoubiquitination)|GO:0006974(response to DNA damage stimulus)|GO:0016874(ligase activity)|GO:0019787(small conjugating protein ligase activity)|GO:0031625(ubiquitin protein ligase binding)|…	Homo sapiens ubiquitin-conjugating enzyme E2T (UBE2T), mRNA [NM_014176]	chr1:202300965-202300906	hs|1q32.1	TAGGGGACTTGTCCTGGTTCATCTTAGTTAATGTGTTCTTTGCCAAGGTGATCTAAGTTG
A_23_P115492	VASH2	79805	NM_024749	-23.8146	8.21651	-50.8968	7.95188	10.8157	6.24194	11.2768	5.6073	2304.83	87.9041	1958.17	48.124	P	P	P	P	0	NM_024749	NM_024749	Hs.96885	vasohibin 2	ENST00000366965	THC2482158	GO:0001938(positive regulation of endothelial cell proliferation)|GO:0005737(cytoplasm)|GO:0045766(positive regulation of angiogenesis)	Homo sapiens vasohibin 2 (VASH2), transcript variant 1, mRNA [NM_024749]	chr1:213163328-213163387	hs|1q32.3	AGTCAACAGATGTTATTTCAGTCTCAGTGCATCTCCTCTGGCTTTCTTTGACTGAAGGTG
A_23_P116037	TM7SF2	7108	NM_003273	-2.65553	8.92288	-10.3621	9.11036	9.65515	8.24615	10.9518	7.57855	986.546	338.405	1555.98	190.189	P	P	P	P	0	NM_003273	NM_003273	Hs.31130	transmembrane 7 superfamily member 2	ENST00000527851	NP650669	GO:0005783(endoplasmic reticulum)|GO:0005789(endoplasmic reticulum membrane)|GO:0005887(integral to plasma membrane)|GO:0006695(cholesterol biosynthetic process)|GO:0043235(receptor complex)|GO:0044281(small molecule metabolic process)|GO:0050613(delta14-sterol reductase activity)|GO:0055114(oxidation-reduction process)	Homo sapiens transmembrane 7 superfamily member 2 (TM7SF2), transcript variant 1, mRNA [NM_003273]	chr11:64880991-64881050	hs|11q13.1	ACGAGAGCTCAACCCTCGTATCTGTTTCTTCGACTTCAAATATTTCTGTGAACTGCGACC
A_23_P116264	NRGN	4900	NM_006176	83.2442	9.84158	262.535	9.86561	7.15591	13.5352	6.63433	14.6707	158.57	11386.4	79.6213	24430.9	P	P	P	P	0	NM_006176	NM_006176	Hs.524116	neurogranin (protein kinase C substrate, RC3)	ENST00000412681	THC2461561	GO:0005516(calmodulin binding)|GO:0005622(intracellular)|GO:0007165(signal transduction)|GO:0007399(nervous system development)|GO:0035556(intracellular signal transduction)	Homo sapiens neurogranin (protein kinase C substrate, RC3) (NRGN), transcript variant 1, mRNA [NM_006176]	chr11:124616792-124616851	hs|11q24.2	GTTGTTTTGGTTTCGGACGACCCTTGCTCTGACCGGAAGAGAAGTCCCTATCCCACACCT
A_23_P116387	INCENP	3619	NM_001040694	-7.21579	8.51882	-3.75773	8.17197	10.0629	7.2117	9.1825	7.27264	1330.79	169.56	456.43	154.464	MP	P	MP	MP	0	NM_001040694	NM_001040694	Hs.142179	inner centromere protein antigens 135/155kDa	ENST00000278849	THC2640910	GO:0000278(mitotic cell cycle)|GO:0000775(chromosome, centromeric region)|GO:0000776(kinetochore)|GO:0000777(condensed chromosome kinetochore)|GO:0000800(lateral element)|GO:0000801(central element)|GO:0000910(cytokinesis)|GO:0005515(protein binding)|GO:0005721(centromeric heterochromatin)|GO:0005819(spindle)|GO:0005829(cytosol)|GO:0005874(microtubule)|GO:0007059(chromosome segregation)|GO:000706…	Homo sapiens inner centromere protein antigens 135/155kDa (INCENP), transcript variant 1, mRNA [NM_001040694]	chr11:61919742-61919801	hs|11q12.3	TTTAGTCTTTGGCATTTTAGCGTTTGGGAGGTAGATTAATAAAGTATATTCCTTCAAGCC
A_23_P116614	ME3	10873	NM_001014811	12.2948	6.96048	3.5812	8.23472	5.38198	9.00195	7.36576	9.2062	44.7988	552.47	129.322	575.447	P	P	P	P	0	NM_001014811	NM_001014811	Hs.199743	malic enzyme 3, NADP(+)-dependent, mitochondrial	ENST00000543262	THC2614244	GO:0004470(malic enzyme activity)|GO:0004471(malate dehydrogenase (decarboxylating) activity)|GO:0004473(malate dehydrogenase (oxaloacetate-decarboxylating) (NADP+) activity)|GO:0005739(mitochondrion)|GO:0005759(mitochondrial matrix)|GO:0006090(pyruvate metabolic process)|GO:0006108(malate metabolic process)|GO:0008948(oxaloacetate decarboxylase activity)|GO:0009060(aerobic respiration)|GO:004687…	Homo sapiens malic enzyme 3, NADP(+)-dependent, mitochondrial (ME3), transcript variant 2, mRNA [NM_001014811]	chr11:86152353-86152294	hs|11q14.2	CCCAAGGAAGCCATGAATGTTCAGACGGTCTGAGGCAGTCTCAGAGGCTAGTATGGGGCT
A_23_P116743	LINC01089	338799	NR_002809	4.04736	12.2549	1.34144	12.2266	11.2879	13.3049	12.0166	12.4403	3236.33	9772.75	3299.8	5219.72	P	P	P	P	0	NR_002809	NR_002809	Hs.524804	long intergenic non-protein coding RNA 1089	ENST00000429892	THC2500579		Homo sapiens long intergenic non-protein coding RNA 1089 (LINC01089), long non-coding RNA [NR_002809]	chr12:122233266-122233207	hs|12q24.31	TTCCAACCTCCATTGCACTGCTTCCCCTAAGACTGTGACCTCCTGGAAGGCTGGAGCACA
A_23_P116942	LAG3	3902	NM_002286	2.23107	11.4691	156.49	7.32777	10.9049	12.0626	4.53928	11.8292	2460.41	4253.9	19.196	3457.68	P	P	P	P	0	NM_002286	NM_002286	Hs.409523	lymphocyte-activation gene 3	ENST00000203629	THC2475230	GO:0003823(antigen binding)|GO:0004888(transmembrane signaling receptor activity)|GO:0007166(cell surface receptor signaling pathway)|GO:0009897(external side of plasma membrane)|GO:0016021(integral to membrane)|GO:0042289(MHC class II protein binding)|GO:0045085(negative regulation of interleukin-2 biosynthetic process)|GO:0045954(positive regulation of natural killer cell mediated cytotoxicity)…	Homo sapiens lymphocyte-activation gene 3 (LAG3), mRNA [NM_002286]	chr12:6887081-6887462	hs|12p13.31	AAGACAGTGGCGACCAAGACGATTTTCTGCCTTAGAGCAAGGGATTCACCCTCCGCAGGC
A_23_P117082	HEBP1	50865	NM_015987	5.86837	10.0603	85.7142	7.97345	8.86448	11.4174	5.38489	11.8064	551.984	2773.02	33.2297	3405.55	P	P	P	P	0	NM_015987	NM_015987	Hs.642618	heme binding protein 1	ENST00000014930	THC2749761	GO:0005576(extracellular region)|GO:0005739(mitochondrion)|GO:0005829(cytosol)|GO:0007623(circadian rhythm)|GO:0020037(heme binding)|GO:0070062(extracellular vesicular exosome)	Homo sapiens heme binding protein 1 (HEBP1), mRNA [NM_015987]	chr12:13127906-13127847	hs|12p13.1	AAGGGGGAAAATGTGATTTGTGCCTGATCTTTCATCTGTGATTCTTATAAGAGCTTTGTC
A_23_P11729	ZBTB7B	51043	NM_001252406	1.29058	8.69849	4.5118	8.66061	8.51643	8.88445	7.64169	9.8154	423.843	514.079	157.05	865.694	P	P	P	P	0	NM_001252406	NM_001252406	Hs.729279	zinc finger and BTB domain containing 7B	ENST00000417934	THC2472538	GO:0003677(DNA binding)|GO:0005634(nucleus)|GO:0005654(nucleoplasm)|GO:0006355(regulation of transcription, DNA-dependent)|GO:0006366(transcription from RNA polymerase II promoter)|GO:0007275(multicellular organismal development)|GO:0007398(ectoderm development)|GO:0030154(cell differentiation)|GO:0046872(metal ion binding)	Homo sapiens zinc finger and BTB domain containing 7B (ZBTB7B), transcript variant 3, mRNA [NM_001252406]	chr1:154989305-154989364	hs|1q21.3	TTCCAATTCCAAGCTAAGAAGGTATTGGGGCAGAGGCTCCCCAAATTGGGGTGATCCCCC
A_23_P117494	MTHFD1	4522	NM_005956	-5.58	12.2968	-3.4819	11.7512	13.5993	11.119	12.6856	10.8857	17152.3	2298.05	5299.1	1797.53	P	P	P	P	0	NM_005956	NM_005956	Hs.652308	methylenetetrahydrofolate dehydrogenase (NADP+ dependent) 1, methenyltetrahydrofolate cyclohydrolase, formyltetrahydrofolate synthetase	ENST00000556284	THC2541068	GO:0000105(histidine biosynthetic process)|GO:0004329(formate-tetrahydrofolate ligase activity)|GO:0004477(methenyltetrahydrofolate cyclohydrolase activity)|GO:0004486(methylenetetrahydrofolate dehydrogenase [NAD(P)+] activity)|GO:0004488(methylenetetrahydrofolate dehydrogenase (NADP+) activity)|GO:0005524(ATP binding)|GO:0005739(mitochondrion)|GO:0005829(cytosol)|GO:0006164(purine nucleotide bio…	Homo sapiens methylenetetrahydrofolate dehydrogenase (NADP+ dependent) 1, methenyltetrahydrofolate cyclohydrolase, formyltetrahydrofolate synthetase (MTHFD1), mRNA [NM_005956]	chr14:64926496-64926555	hs|14q23.3	AAGCTACTTTGAAAGTCTGGCCAGTGTCTATTCAGGCCCACTGGGAGTTAGGAAGTATAA
A_23_P117602	GZMB	3002	NM_004131	7.54298	14.924	3293.62	8.61969	13.5374	16.4526	4.57055	16.256	16405.3	88015.2	19.5758	69763.7	P	P	P	P	0	NM_004131	NM_004131	Hs.1051	granzyme B (granzyme 2, cytotoxic T-lymphocyte-associated serine esterase 1)	ENST00000382542	NP1073088	GO:0001772(immunological synapse)|GO:0004252(serine-type endopeptidase activity)|GO:0005515(protein binding)|GO:0005634(nucleus)|GO:0005737(cytoplasm)|GO:0005829(cytosol)|GO:0006508(proteolysis)|GO:0006915(apoptotic process)|GO:0006955(immune response)|GO:0007219(Notch signaling pathway)|GO:0008236(serine-type peptidase activity)|GO:0008626(induction of apoptosis by granzyme)|GO:0016020(membrane)…	Homo sapiens granzyme B (granzyme 2, cytotoxic T-lymphocyte-associated serine esterase 1) (GZMB), mRNA [NM_004131]	chr14:25100295-25100236	hs|14q12	AACCATGAAACGCTACTAACTACAGGAAGCAAACTAAGCCCCCGCTGTAATGAAACACCT
A_23_P117852	KIAA0101	9768	NM_014736	-36.9425	10.4622	-45.6641	9.74052	13.3849	8.17772	12.8795	7.36655	14593.3	323.804	6089.42	164.763	MP	MP	MP	MP	0	NM_014736	NM_014736	Hs.81892	KIAA0101	ENST00000300035	THC2611322	GO:0003682(chromatin binding)|GO:0005515(protein binding)|GO:0005634(nucleus)|GO:0005737(cytoplasm)|GO:0006260(DNA replication)|GO:0006974(response to DNA damage stimulus)|GO:0009411(response to UV)|GO:0019985(translesion synthesis)|GO:0048471(perinuclear region of cytoplasm)|GO:0051297(centrosome organization)|GO:0051726(regulation of cell cycle)	Homo sapiens KIAA0101 (KIAA0101), transcript variant 1, mRNA [NM_014736]	chr15:64657906-64657847	hs|15q22.31	TACTGCTGCCATTTTTATTGGTGTTTGATTATTGGAATGGTGCCATATTGTCACTCCTTC
A_23_P117933	GCSH	2653	NM_004483	-5.84018	11.068	-7.62303	10.4739	12.414	9.86796	12.041	9.11067	7376.91	986.135	3359.77	543.084	P	P	P	P	0	NM_004483	NM_004483	Hs.546256	glycine cleavage system protein H (aminomethyl carrier)	ENST00000564386	THC2463161	GO:0004047(aminomethyltransferase activity)|GO:0005739(mitochondrion)|GO:0005960(glycine cleavage complex)|GO:0006546(glycine catabolic process)|GO:0019464(glycine decarboxylation via glycine cleavage system)|GO:0019899(enzyme binding)|GO:0032259(methylation)	Homo sapiens glycine cleavage system protein H (aminomethyl carrier) (GCSH), transcript variant 1, mRNA [NM_004483]	chr16:81116042-81115983	hs|16q23.2	GTCAGATGAGGAACACCACTATCTTAATTTTGCGATACACTGCATTTGCTGGTGCTATTT
A_23_P118	EXTL2	2135	NM_001439	-4.00927	5.85287	-3.26551	5.85648	6.93963	4.93629	6.77202	5.06471	134.739	36.0382	87.1757	33.2998	P	P	P	P	0	NM_001439	NM_001439	Hs.357637	exostosin-like glycosyltransferase 2	ENST00000370114	THC2607313	GO:0001888(glucuronyl-galactosyl-proteoglycan 4-alpha-N-acetylglucosaminyltransferase activity)|GO:0005783(endoplasmic reticulum)|GO:0005789(endoplasmic reticulum membrane)|GO:0006024(glycosaminoglycan biosynthetic process)|GO:0006044(N-acetylglucosamine metabolic process)|GO:0015012(heparan sulfate proteoglycan biosynthetic process)|GO:0016021(integral to membrane)|GO:0019276(UDP-N-acetylgalacto…	Homo sapiens exostosin-like glycosyltransferase 2 (EXTL2), transcript variant 1, mRNA [NM_001439]	chr1:101338624-101338565	hs|1p21.2	GTTAAAACCCTTTGTATCAAAAGATCTTTATTGGTAGAGCACTGGTTATCTTCTGGATAC
A_23_P118061	CKLF	51192	NM_181641	3.99014	11.3985	14.4389	10.3269	10.4439	12.4403	8.57901	12.4309	1755.58	5429.63	302.349	5182.32	P	P	P	P	0	NM_181641	NM_181641	Hs.15159	chemokine-like factor	ENST00000526149	THC2483477	GO:0005576(extracellular region)|GO:0005615(extracellular space)|GO:0008009(chemokine activity)|GO:0008283(cell proliferation)|GO:0016020(membrane)|GO:0016021(integral to membrane)|GO:0030593(neutrophil chemotaxis)|GO:0032940(secretion by cell)|GO:0048246(macrophage chemotaxis)|GO:0048247(lymphocyte chemotaxis)	Homo sapiens chemokine-like factor (CKLF), transcript variant 4, mRNA [NM_181641]	chr16:66592129-66592188	hs|16q21	GCACAAGCCCCTGAACCATATATTGTTATCACTGGATTTGAAGTCACCGTTATCTTATTT
A_23_P118246	GINS2	51659	NM_016095	-30.6676	9.34793	-42.2303	8.03115	12.1379	7.19926	11.173	5.77279	6006.87	167.688	1814.72	53.8183	P	P	P	MP	0	NM_016095	NM_016095	Hs.433180	GINS complex subunit 2 (Psf2 homolog)	ENST00000253462	THC2467056	GO:0000278(mitotic cell cycle)|GO:0005515(protein binding)|GO:0005654(nucleoplasm)|GO:0006271(DNA strand elongation involved in DNA replication)	Homo sapiens GINS complex subunit 2 (Psf2 homolog) (GINS2), mRNA [NM_016095]	chr16:85711713-85711654	hs|16q24.1	TGTGTGATGGTGCAAGGAATGGATTCAGGATGTTGTTGGAGAAACAAGTTTGTGATTAGT
A_23_P118392	RASD1	51655	NM_016084	4.71188	7.77843	8.03923	7.87103	6.74024	8.97654	6.50981	9.51687	116.688	544.002	72.8037	715.088	P	P	MP	MP	0	NM_016084	NM_016084	Hs.25829	RAS, dexamethasone-induced 1	ENST00000225688	THC2466358	GO:0003924(GTPase activity)|GO:0005525(GTP binding)|GO:0005634(nucleus)|GO:0005886(plasma membrane)|GO:0006184(GTP catabolic process)|GO:0007165(signal transduction)|GO:0007186(G-protein coupled receptor signaling pathway)|GO:0007263(nitric oxide mediated signal transduction)|GO:0007264(small GTPase mediated signal transduction)|GO:0045892(negative regulation of transcription, DNA-dependent)|GO:0…	Homo sapiens RAS, dexamethasone-induced 1 (RASD1), transcript variant 1, mRNA [NM_016084]	chr17:17397846-17397787	hs|17p11.2	CTTACCCAGGTGTTTATACTGTGTGTGTGTGAGGTCTTTAAAGTTATTGCTTTATTTGGT
A_23_P118427	MAP2K3	5606	NM_145109	2.52099	9.22081	4.38128	9.5118	8.5779	9.91189	8.50563	10.637	443.087	1013.92	286.596	1514.4	P	P	P	P	0	NM_145109	NM_145109	Hs.514012	mitogen-activated protein kinase kinase 3	ENST00000613338	THC2784975	GO:0000187(activation of MAPK activity)|GO:0002224(toll-like receptor signaling pathway)|GO:0002755(MyD88-dependent toll-like receptor signaling pathway)|GO:0002756(MyD88-independent toll-like receptor signaling pathway)|GO:0004702(receptor signaling protein serine/threonine kinase activity)|GO:0004708(MAP kinase kinase activity)|GO:0004713(protein tyrosine kinase activity)|GO:0005515(protein bin…	Homo sapiens mitogen-activated protein kinase kinase 3 (MAP2K3), transcript variant B, mRNA [NM_145109]	chr17:21217988-21218047	hs|17p11.2	TATCCCGGCTTTGGTGCGGGGTACACAAGAGGGGATGAGTTGTGTGAATACCCCAAGACT
A_23_P11862	C1orf112	55732	NM_018186	-6.26466	9.77442	-3.95448	9.2402	11.1873	8.54002	10.285	8.30152	3020.22	410.43	994.118	314.156	P	P	P	P	0	NM_018186	NM_018186	Hs.443551	chromosome 1 open reading frame 112	ENST00000413811	NP1459063		Homo sapiens chromosome 1 open reading frame 112 (C1orf112), mRNA [NM_018186]	chr1:169822110-169822169	hs|1q24.2	CATACATACTCTAGGGTGAAACTTATCACTAGGCAGAACTGGGTTTGATGCTTTGTCAAC
A_23_P118815	BIRC5	332	NM_001012271	-45.9424	10.5297	-52.5619	9.44613	13.6465	8.12478	12.727	7.01103	17772.8	312.905	5447.1	127.724	P	P	P	MP	0	NM_001012271	NM_001012271	Hs.744872	baculoviral IAP repeat containing 5	ENST00000301633	THC2464956	GO:0000086(G2/M transition of mitotic cell cycle)|GO:0000228(nuclear chromosome)|GO:0000278(mitotic cell cycle)|GO:0000775(chromosome, centromeric region)|GO:0000777(condensed chromosome kinetochore)|GO:0000910(cytokinesis)|GO:0004842(ubiquitin-protein ligase activity)|GO:0004869(cysteine-type endopeptidase inhibitor activity)|GO:0005515(protein binding)|GO:0005634(nucleus)|GO:0005737(cytoplasm)|…	Homo sapiens baculoviral IAP repeat containing 5 (BIRC5), transcript variant 3, mRNA [NM_001012271]	chr17:76220720-76220779	hs|17q25.3	CTGGAAACCTCTGGAGGTCATCTCGGCTGTTCCTGAGAAATAAAAAGCCTGTCATTTCAA
A_23_P119042	NKG7	4818	NM_005601	64.2117	13.6331	723.717	10.7194	10.9574	16.9622	6.97487	16.4741	2557.67	121084	99.5957	83503.9	P	P	P	P	0	NM_005601	NM_005601	Hs.10306	natural killer cell granule protein 7	ENST00000221978	THC2608014	GO:0005887(integral to plasma membrane)	Homo sapiens natural killer cell granule protein 7 (NKG7), mRNA [NM_005601]	chr19:51875005-51874946	hs|19q13.41	GTTTTGAGCGTTGTATTCCAAAGGCCTCATCTGGAGCCTCGGGAAAGTCTGGTCCCACAT
A_23_P119196	KLF2	10365	NM_016270	20.3935	13.3807	10.5363	14.0107	11.3813	15.7314	12.4146	15.8119	3477.86	51949.4	4390.55	51885.2	P	P	P	P	0	NM_016270	NM_016270	Hs.744182	Kruppel-like factor 2	ENST00000248071	THC2467900	GO:0000902(cell morphogenesis)|GO:0001701(in utero embryonic development)|GO:0003700(sequence-specific DNA binding transcription factor activity)|GO:0005515(protein binding)|GO:0005634(nucleus)|GO:0006351(transcription, DNA-dependent)|GO:0032715(negative regulation of interleukin-6 production)|GO:0035264(multicellular organism growth)|GO:0036003(positive regulation of transcription from RNA polym…	Homo sapiens Kruppel-like factor 2 (KLF2), mRNA [NM_016270]	chr19:16438246-16438305	hs|19p13.11	GAGACAGGTGGGCATTTTTGGGCTACCTGGTTCGTTTTTATAAGATTTTGCTGGGTTGGT
A_23_P119254	ASF1B	55723	NM_018154	-11.3544	9.71215	-15.6858	9.27987	11.6216	8.11642	11.4756	7.50425	4165.69	311.405	2237.68	180.986	P	P	P	P	0	NM_018154	NM_018154	Hs.26516	anti-silencing function 1B histone chaperone	ENST00000263382	THC2468162	GO:0000790(nuclear chromatin)|GO:0005515(protein binding)|GO:0005654(nucleoplasm)|GO:0006335(DNA replication-dependent nucleosome assembly)|GO:0006336(DNA replication-independent nucleosome assembly)|GO:0006351(transcription, DNA-dependent)|GO:0006355(regulation of transcription, DNA-dependent)|GO:0007275(multicellular organismal development)|GO:0007283(spermatogenesis)|GO:0016568(chromatin modif…	Homo sapiens anti-silencing function 1B histone chaperone (ASF1B), mRNA [NM_018154]	chr19:14230697-14230638	hs|19p13.12	AGGAACCATGTTGCCTTTCCTGTCAATCACAGCCACCTTCCTGTTATCTCCTAAATGGAT
A_23_P119337	ATF5	22809	NM_012068	-7.63849	9.14605	-28.0779	10.307	10.7295	7.79625	12.9897	8.17835	2156.58	251.73	6611.97	288.729	P	P	P	P	0	NM_012068	NM_012068	Hs.9754	activating transcription factor 5	ENST00000423777	THC2579396	GO:0000977(RNA polymerase II regulatory region sequence-specific DNA binding)|GO:0001228(RNA polymerase II transcription regulatory region sequence-specific DNA binding transcription factor activity involved in positive regulation of transcription)|GO:0003714(transcription corepressor activity)|GO:0005515(protein binding)|GO:0005654(nucleoplasm)|GO:0005667(transcription factor complex)|GO:0005737…	Homo sapiens activating transcription factor 5 (ATF5), transcript variant 1, mRNA [NM_012068]	chr19:50436754-50436813	hs|19q13.33	ACAGAGAAGCAGCTGGGAGCTTGGAAACCTGGTCTCTTGAATTTCAAACCTGGTTTCTTA
A_23_P119362	EMP3	2014	NM_001425	3.38229	13.8588	7.39957	13.3422	13.0076	14.7656	11.9764	14.8638	11183.9	26365.2	3193.35	27477.7	P	P	P	P	0	NM_001425	NM_001425	Hs.9999	epithelial membrane protein 3	ENST00000597057	THC2785727	GO:0005515(protein binding)|GO:0005886(plasma membrane)|GO:0008219(cell death)|GO:0008285(negative regulation of cell proliferation)|GO:0016021(integral to membrane)|GO:0016049(cell growth)|GO:0032060(bleb assembly)	Homo sapiens epithelial membrane protein 3 (EMP3), mRNA [NM_001425]	chr19:48832675-48832734	hs|19q13.33	TGTTCATGTTCCAGCTCTACACCATGCGACGAGGAGGTCTCTTCTATGCCACCGGCCTCT
A_23_P119478	EBI3	10148	NM_005755	-503.508	8.27609	-268.437	10.0355	13.9026	4.92669	14.8502	6.78179	21403.9	35.6873	25272.5	108.624	P	P	P	P	0	NM_005755	NM_005755	Hs.501452	Epstein-Barr virus induced 3	ENST00000221847	THC2737205	GO:0004896(cytokine receptor activity)|GO:0005125(cytokine activity)|GO:0005515(protein binding)|GO:0005615(extracellular space)|GO:0005886(plasma membrane)|GO:0006959(humoral immune response)|GO:0019221(cytokine-mediated signaling pathway)|GO:0042088(T-helper 1 type immune response)|GO:0045078(positive regulation of interferon-gamma biosynthetic process)|GO:0045523(interleukin-27 receptor bindin…	Homo sapiens Epstein-Barr virus induced 3 (EBI3), mRNA [NM_005755]	chr19:4237260-4237319	hs|19p13.3	TCTAGCTGAGAAATGGAGATGTACTACTCTCTCCTTTACCTTTACCTTTACCACAGTGCA
A_23_P119835	NLRC4	58484	NM_021209	47.5825	7.35275	20.8017	7.70924	5.07675	10.6491	5.82477	10.2034	36.2608	1668.5	45.2755	1133.97	P	P	P	P	0	NM_021209	NM_021209	Hs.574741	NLR family, CARD domain containing 4	ENST00000404025	NP365495	GO:0000287(magnesium ion binding)|GO:0002218(activation of innate immune response)|GO:0004842(ubiquitin-protein ligase activity)|GO:0004869(cysteine-type endopeptidase inhibitor activity)|GO:0005515(protein binding)|GO:0005524(ATP binding)|GO:0005622(intracellular)|GO:0005634(nucleus)|GO:0005737(cytoplasm)|GO:0005829(cytosol)|GO:0005876(spindle microtubule)|GO:0006919(activation of cysteine-type …	Homo sapiens NLR family, CARD domain containing 4 (NLRC4), transcript variant 1, mRNA [NM_021209]	chr2:32449762-32449703	hs|2p22.3	ATGGATGGCTTGCCTTCATGGGTGTATTTGAGAATCTTAAGCAATTAGTGTTTTTTGACT
A_23_P119916	WNT6	7475	NM_006522	-3.61225	7.00712	-17.0921	7.80844	7.99455	6.14165	10.1201	6.02483	287.403	82.5606	890.521	64.3367	P	P	P	P	0	NM_006522	NM_006522	Hs.29764	wingless-type MMTV integration site family, member 6	ENST00000233948	THC2471878	GO:0001658(branching involved in ureteric bud morphogenesis)|GO:0005109(frizzled binding)|GO:0005576(extracellular region)|GO:0005578(proteinaceous extracellular matrix)|GO:0005615(extracellular space)|GO:0005788(endoplasmic reticulum lumen)|GO:0005796(Golgi lumen)|GO:0005886(plasma membrane)|GO:0009798(axis specification)|GO:0009986(cell surface)|GO:0010628(positive regulation of gene expression…	Homo sapiens wingless-type MMTV integration site family, member 6 (WNT6), mRNA [NM_006522]	chr2:219738852-219738911	hs|2q35	TGGAAAAAAGCCAGTCTAAAGGCCTCTGGATACTGGGCTCCCCAGAACTGCTGGCCACAG
A_23_P120227	LBH	81606	NM_030915	13.0632	10.9649	5.21873	10.8422	9.26674	12.9742	9.71571	12.0994	741.676	7877.12	670.853	4149.49	P	P	P	P	0	NM_030915	NM_030915	Hs.567598	limb bud and heart development	ENST00000395323	THC2738167	GO:0005634(nucleus)|GO:0005737(cytoplasm)|GO:0006351(transcription, DNA-dependent)|GO:0007275(multicellular organismal development)|GO:0010468(regulation of gene expression)|GO:0030193(regulation of blood coagulation)|GO:0045893(positive regulation of transcription, DNA-dependent)	Homo sapiens limb bud and heart development (LBH), mRNA [NM_030915]	chr2:30482471-30482530	hs|2p23.1	CTTGTAAACTGCGTAACAAATCTACTTTGTGTATGTGTCTGTTTATGGGGGTGGTTTATT
A_23_P120316	MTHFD2	10797	NM_006636	-7.46237	11.4563	-3.57023	11.4323	12.9975	10.0978	12.3871	10.5511	11068.9	1145.38	4298.73	1434.23	P	P	P	P	0	NM_006636	NM_006636	Hs.469030	methylenetetrahydrofolate dehydrogenase (NADP+ dependent) 2, methenyltetrahydrofolate cyclohydrolase	ENST00000394053	THC2543784	GO:0000287(magnesium ion binding)|GO:0004329(formate-tetrahydrofolate ligase activity)|GO:0004477(methenyltetrahydrofolate cyclohydrolase activity)|GO:0004487(methylenetetrahydrofolate dehydrogenase (NAD+) activity)|GO:0004488(methylenetetrahydrofolate dehydrogenase (NADP+) activity)|GO:0005615(extracellular space)|GO:0005739(mitochondrion)|GO:0005829(cytosol)|GO:0006730(one-carbon metabolic proc…	Homo sapiens methylenetetrahydrofolate dehydrogenase (NADP+ dependent) 2, methenyltetrahydrofolate cyclohydrolase (MTHFD2), transcript variant 1, mRNA [NM_006636]	chr2:74441985-74442044	hs|2p13.1	AGGATTATTCCTTGCTATTAGTACTCATTTTATGTATGTTACCCTTCAGTAAGTTCTCCC
A_23_P120467	ZFP64	55734	NM_199427	-5.018	8.34205	-6.18714	8.09298	9.58636	7.25925	9.5137	6.88443	936.826	175.163	576.637	117.095	P	P	P	P	0	NM_199427	NM_199427	Hs.473082	ZFP64 zinc finger protein	ENST00000361387	THC2463634	GO:0003677(DNA binding)|GO:0005634(nucleus)|GO:0006351(transcription, DNA-dependent)|GO:0006355(regulation of transcription, DNA-dependent)|GO:0046872(metal ion binding)|GO:0048026(positive regulation of nuclear mRNA splicing, via spliceosome)	Homo sapiens ZFP64 zinc finger protein (ZFP64), transcript variant 4, mRNA [NM_199427]	chr20:50700673-50700614	hs|20q13.2	GTCTGGGGTTGCTGGAAAACTTCTATTTCATAACCTGGGTGATCGTTCTAAGAGTGTTTG
A_23_P120812	IGLL1	3543	NM_020070	5.96254	6.26872	1.42182	7.41524	5.1117	7.68762	7.16571	7.67345	37.2857	233.077	113.567	203.855	P	P	P	M	0	NM_020070	NM_020070	Hs.348935	immunoglobulin lambda-like polypeptide 1	ENST00000330377	THC2471192	GO:0006955(immune response)|GO:0016020(membrane)|GO:0070062(extracellular vesicular exosome)	Homo sapiens immunoglobulin lambda-like polypeptide 1 (IGLL1), transcript variant 1, mRNA [NM_020070]	chr22:23917222-23917163	hs|22q11.23	GGGGGTTTCAATCCAAGCATAACTCAGTGACGCATGTGTTTGGCAGCGGGACCCAGCTCA
A_23_P12082	CHI3L2	1117	NM_001025199	-14.2158	10.8808	-32.3671	11.2286	12.9627	9.13327	14.0136	8.99711	10741.5	606.375	13733.3	504.991	P	P	P	P	0	NM_001025199	NM_001025199	Hs.514840	chitinase 3-like 2	ENST00000369748	THC2639557	GO:0004568(chitinase activity)|GO:0005615(extracellular space)|GO:0005975(carbohydrate metabolic process)|GO:0006032(chitin catabolic process)|GO:0006955(immune response)|GO:0008061(chitin binding)|GO:0030246(carbohydrate binding)	Homo sapiens chitinase 3-like 2 (CHI3L2), transcript variant 3, mRNA [NM_001025199]	chr1:111784040-111784882	hs|1p13.3	ATGATGTGAAGAGTATGGAGACCAAGGTTCAGTTCTTAAAGAATTTAAACCTGGGAGGAG
A_23_P120822	UPB1	51733	NM_016327	-7.64496	6.82127	-22.8871	7.21468	8.44454	5.51004	9.81807	5.30161	402.475	54.0404	720.742	38.9662	P	P	P	M	0	NM_016327	NM_016327	Hs.731656	ureidopropionase, beta	ENST00000326010	THC2472636	GO:0003837(beta-ureidopropionase activity)|GO:0005829(cytosol)|GO:0006206(pyrimidine base metabolic process)|GO:0019483(beta-alanine biosynthetic process)|GO:0044281(small molecule metabolic process)|GO:0046135(pyrimidine nucleoside catabolic process)|GO:0046872(metal ion binding)|GO:0055086(nucleobase-containing small molecule metabolic process)|GO:0070062(extracellular vesicular exosome)	Homo sapiens ureidopropionase, beta (UPB1), mRNA [NM_016327]	chr22:24921819-24921878	hs|22q11.23	AAGTGTGGCAGGCTTAACATGTCCAGGTTCTCCCCAATAACATTGTCCAGGTTGGTTTTA
A_23_P120883	HMOX1	3162	NM_002133	10.8244	11.9609	3.65782	12.777	10.3656	13.8018	11.8757	13.7467	1660.13	13546.1	2969.46	12632.5	P	P	P	P	0	NM_002133	NM_002133	Hs.517581	heme oxygenase (decycling) 1	ENST00000216117	THC2468207	GO:0001525(angiogenesis)|GO:0001935(endothelial cell proliferation)|GO:0002246(wound healing involved in inflammatory response)|GO:0002686(negative regulation of leukocyte migration)|GO:0004392(heme oxygenase (decyclizing) activity)|GO:0004630(phospholipase D activity)|GO:0004871(signal transducer activity)|GO:0005615(extracellular space)|GO:0005634(nucleus)|GO:0005730(nucleolus)|GO:0005783(endop…	Homo sapiens heme oxygenase (decycling) 1 (HMOX1), mRNA [NM_002133]	chr22:35790122-35790181	hs|22q12.3	TGGGGAGGGAGGTGTTTAACGGCACTGTGGCCTTGGTCTAACTTTTGTGTGAAATAATAA
A_23_P121011	CSRNP1	64651	NM_033027	1.70453	8.70745	13.3088	10.0543	8.33126	9.10063	8.35903	12.0933	370.509	593.557	257.486	4137.6	P	P	P	P	0	NM_033027	NM_033027	Hs.370950	cysteine-serine-rich nuclear protein 1	ENST00000514182	THC2461302	GO:0001228(RNA polymerase II transcription regulatory region sequence-specific DNA binding transcription factor activity involved in positive regulation of transcription)|GO:0003674(molecular_function)|GO:0003700(sequence-specific DNA binding transcription factor activity)|GO:0005634(nucleus)|GO:0006351(transcription, DNA-dependent)|GO:0006915(apoptotic process)|GO:0009791(post-embryonic developm…	Homo sapiens cysteine-serine-rich nuclear protein 1 (CSRNP1), mRNA [NM_033027]	chr3:39184219-39184160	hs|3p22.2	GCGTGATGTTCCTTAGCCCAAAGACGGTGAGACAGGGCTGAAATCAGGTGGCTTCTGCCA
A_23_P121082	GBE1	2632	NM_000158	-9.53113	10.8652	-3.8865	10.4138	12.6126	9.35992	11.4389	9.48047	8433.23	712.031	2192.15	696.274	P	P	P	P	0	NM_000158	NM_000158	Hs.436062	glucan (1,4-alpha-), branching enzyme 1	ENST00000429644	THC2467923	GO:0003844(1,4-alpha-glucan branching enzyme activity)|GO:0004553(hydrolase activity, hydrolyzing O-glycosyl compounds)|GO:0005829(cytosol)|GO:0005975(carbohydrate metabolic process)|GO:0005977(glycogen metabolic process)|GO:0005978(glycogen biosynthetic process)|GO:0006006(glucose metabolic process)|GO:0006091(generation of precursor metabolites and energy)|GO:0009405(pathogenesis)|GO:0043169(ca…	Homo sapiens glucan (1,4-alpha-), branching enzyme 1 (GBE1), mRNA [NM_000158]	chr3:81538971-81538912	hs|3p12.2	TTGTCCACTAAGTATCTTGTTAAATGCCAGTATCTCAGTCTTTCTGAAGCCCTGAAATGG
A_23_P121222	RAD18	56852	NM_020165	-4.62963	8.24354	-6.08098	7.47754	9.42278	7.21188	8.89222	6.28792	833.595	169.57	370.6	77.2044	P	P	P	P	0	NM_020165	NM_020165	Hs.375684	RAD18 E3 ubiquitin protein ligase	ENST00000264926	THC2462576	GO:0000403(Y-form DNA binding)|GO:0000785(chromatin)|GO:0001741(XY body)|GO:0003684(damaged DNA binding)|GO:0005515(protein binding)|GO:0005634(nucleus)|GO:0005657(replication fork)|GO:0006281(DNA repair)|GO:0007283(spermatogenesis)|GO:0008270(zinc ion binding)|GO:0009411(response to UV)|GO:0016567(protein ubiquitination)|GO:0016874(ligase activity)|GO:0031593(polyubiquitin binding)|GO:0031625(ub…	Homo sapiens RAD18 E3 ubiquitin protein ligase (RAD18), mRNA [NM_020165]	chr3:8921693-8921634	hs|3p25.3	GAGCATGTCAAACAAAATAGGAGCTCACATGGATATATTTATGTCACTGAGTTGTCAGAA
A_23_P121253	TNFSF10	8743	NM_003810	1.20212	12.0627	10.5671	9.51189	11.9306	12.1962	7.96199	11.3635	5202.25	4661.92	196.936	2524.91	P	P	P	P	0	NM_003810	NM_003810	Hs.478275	tumor necrosis factor (ligand) superfamily, member 10	ENST00000241261	THC2507406	GO:0005102(receptor binding)|GO:0005125(cytokine activity)|GO:0005164(tumor necrosis factor receptor binding)|GO:0005515(protein binding)|GO:0005576(extracellular region)|GO:0005615(extracellular space)|GO:0005887(integral to plasma membrane)|GO:0006915(apoptotic process)|GO:0006919(activation of cysteine-type endopeptidase activity involved in apoptotic process)|GO:0006955(immune response)|GO:00…	Homo sapiens tumor necrosis factor (ligand) superfamily, member 10 (TNFSF10), transcript variant 1, mRNA [NM_003810]	chr3:172223925-172223866	hs|3q26.31	GCAACAATCCATCTCTCAAGTAGTGTATCACAGTAGTAGCCTCCAGGTTTCCTTAAGGGA
A_23_P121499	WFS1	7466	NM_006005	-5.95554	8.29673	-7.60329	7.93221	9.68309	7.10886	9.52937	6.60274	1008.03	158.17	584.755	95.9361	P	P	P	P	0	NM_006005	NM_006005	Hs.518602	Wolfram syndrome 1 (wolframin)	ENST00000503569	THC2603148	GO:0001822(kidney development)|GO:0003091(renal water homeostasis)|GO:0005215(transporter activity)|GO:0005516(calmodulin binding)|GO:0005783(endoplasmic reticulum)|GO:0005789(endoplasmic reticulum membrane)|GO:0006983(ER overload response)|GO:0006987(activation of signaling protein activity involved in unfolded protein response)|GO:0007601(visual perception)|GO:0007605(sensory perception of soun…	Homo sapiens Wolfram syndrome 1 (wolframin) (WFS1), transcript variant 1, mRNA [NM_006005]	chr4:6304435-6304494	hs|4p16.1	CTGACCTTTCTGAGTGACATGGGTGTGCCAGGCTAGACTAGGAGGTTCCGGTGTCTGGAA
A_23_P121533	SPON2	10417	NM_012445	170.129	11.8241	8.03297	13.513	8.68581	16.0963	12.0933	15.0993	484.925	66179.9	3474.46	31571.2	P	P	P	MP	0	NM_012445	NM_012445	Hs.635350	spondin 2, extracellular matrix protein	ENST00000617421	THC2601265	GO:0001530(lipopolysaccharide binding)|GO:0002448(mast cell mediated immunity)|GO:0003823(antigen binding)|GO:0005578(proteinaceous extracellular matrix)|GO:0005615(extracellular space)|GO:0007155(cell adhesion)|GO:0007411(axon guidance)|GO:0008228(opsonization)|GO:0032755(positive regulation of interleukin-6 production)|GO:0032760(positive regulation of tumor necrosis factor production)|GO:00431…	Homo sapiens spondin 2, extracellular matrix protein (SPON2), transcript variant 1, mRNA [NM_012445]	chr4:1160797-1160738	hs|4p16.3	GCGGTTTCGGAAGCGTCAGTGTTTCCATGTTATGGATCTCTCTGCGTTTGAATAAAGACT
A_23_P121676	CXXC4	80319	NM_025212	-14.0187	7.36173	-18.1225	7.67034	9.50877	5.69949	10.0398	5.86009	883.336	61.6368	841.108	57.086	P	P	P	P	0	NM_025212	NM_025212	Hs.12248	CXXC finger protein 4	ENST00000515509	THC2478979	GO:0003677(DNA binding)|GO:0005737(cytoplasm)|GO:0007352(zygotic specification of dorsal/ventral axis)|GO:0008270(zinc ion binding)|GO:0016023(cytoplasmic membrane-bounded vesicle)|GO:0016055(Wnt receptor signaling pathway)|GO:0030165(PDZ domain binding)|GO:0030178(negative regulation of Wnt receptor signaling pathway)|GO:0031410(cytoplasmic vesicle)	Homo sapiens CXXC finger protein 4 (CXXC4), mRNA [NM_025212]	chr4:105393495-105393436	hs|4q24	TCCGATGGTTCTTTTAAAGCAGTAGTATATCTTATTTTCAAGGCATTTGGAAATGAAGGG
A_23_P122007	C5orf30	90355	NM_033211	-6.04634	9.39971	-6.38171	8.97464	10.7869	8.19088	10.4106	7.7367	2258.05	326.79	1083.37	212.597	P	MP	P	P	0	NM_033211	NM_033211	Hs.482976	chromosome 5 open reading frame 30	ENST00000510890	THC2461293	GO:0005515(protein binding)|GO:0005737(cytoplasm)|GO:0015031(protein transport)|GO:0035869(ciliary transition zone)|GO:0060271(cilium morphogenesis)	Homo sapiens chromosome 5 open reading frame 30 (C5orf30), mRNA [NM_033211]	chr5:102613812-102613871	hs|5q21.1	ATCAGATTTCTCGTTGGGCTGGAAATGTTTCGCTGTTGTATATTTTAAAGTAAATTGCAC
A_23_P122197	CCNB1	891	NM_031966	-36.145	9.63098	-26.4584	9.13483	12.5605	7.38474	11.7983	7.07264	8178.47	190.696	2809.44	133.187	P	P	P	P	0	NM_031966	NM_031966	Hs.23960	cyclin B1	ENST00000256442	THC2521325	GO:0000079(regulation of cyclin-dependent protein kinase activity)|GO:0000082(G1/S transition of mitotic cell cycle)|GO:0000086(G2/M transition of mitotic cell cycle)|GO:0000278(mitotic cell cycle)|GO:0000922(spindle pole)|GO:0000942(condensed nuclear chromosome outer kinetochore)|GO:0001556(oocyte maturation)|GO:0001701(in utero embryonic development)|GO:0001933(negative regulation of protein ph…	Homo sapiens cyclin B1 (CCNB1), mRNA [NM_031966]	chr5:68471363-68473123	hs|5q13.2	GGACACCAACTCTACAACATTACCTGTCATATACTGAAGAATCTCTTCTTCCAGTTATGC
A_23_P122443	HIST1H1C	3006	NM_005319	-8.46679	14.2698	-1.67575	13.6296	15.8936	12.8118	14.0071	13.2623	77341.2	7079.69	13614.6	9203.09	P	P	P	P	0	NM_005319	NM_005319	Hs.7644	histone cluster 1, H1c	ENST00000343677	THC2467269	GO:0000786(nucleosome)|GO:0005515(protein binding)|GO:0005634(nucleus)|GO:0005719(nuclear euchromatin)|GO:0006334(nucleosome assembly)|GO:0016584(nucleosome positioning)|GO:0031490(chromatin DNA binding)	Homo sapiens histone cluster 1, H1c (HIST1H1C), mRNA [NM_005319]	chr6:26056109-26056050	hs|6p22.2	AGAAAGCTGCCAAAAGTGCTGCTAAGGCTGTGAAGCCCAAGGCCGCTAAGCCCAAGGTTG
A_23_P122464	ZSCAN9	7746	NM_006299	-1.94731	8.04344	-4.60432	7.88188	8.53853	7.57705	9.05997	6.85698	430.781	216.828	418.721	114.744	P	P	P	P	0	NM_006299	NM_006299	Hs.100921	zinc finger and SCAN domain containing 9	ENST00000252207	THC2464455	GO:0003677(DNA binding)|GO:0003700(sequence-specific DNA binding transcription factor activity)|GO:0005634(nucleus)|GO:0006351(transcription, DNA-dependent)|GO:0006355(regulation of transcription, DNA-dependent)|GO:0046872(metal ion binding)	Homo sapiens zinc finger and SCAN domain containing 9 (ZSCAN9), transcript variant 2, mRNA [NM_006299]	chr6:28200866-28200925	hs|6p22.1	TCACCAGTGCATTGAATGTGGGAAAAGCTTTAATCGACACTGCAACCTCATTCGCCATCA
A_23_P122563	PFDN6	10471	NM_014260	-3.56921	11.9245	-4.01196	11.1746	12.8776	11.042	12.2216	10.2173	10171.7	2176.26	3808.02	1144.19	MP	MP	MP	MP	0	NM_014260	NM_014260	Hs.446374	prefoldin subunit 6	ENST00000374610	THC2471838	GO:0005737(cytoplasm)|GO:0006457(protein folding)|GO:0016272(prefoldin complex)|GO:0044267(cellular protein metabolic process)|GO:0051082(unfolded protein binding)|GO:0051084('de novo' posttranslational protein folding)|GO:0051087(chaperone binding)|GO:0051131(chaperone-mediated protein complex assembly)	Homo sapiens prefoldin subunit 6 (PFDN6), transcript variant 2, mRNA [NM_014260]	chr6:33258190-33258514	hs|6p21.32	ACAGTAGGGAAGAGGCTGGACTATATCACAGCTGAAATTAAGCGATACGAATCCCAGCTT
A_23_P122724	VNN2	8875	NM_004665	3.18849	12.3058	5.97333	12.6561	11.4978	13.1707	11.4324	14.0109	3822.08	8916.56	2183.55	15059.4	P	P	P	P	0	NM_004665	NM_004665	Hs.293130	vanin 2	ENST00000392389	NP1195731	GO:0005886(plasma membrane)|GO:0006928(cellular component movement)|GO:0015939(pantothenate metabolic process)|GO:0017159(pantetheine hydrolase activity)|GO:0031225(anchored to membrane)	Homo sapiens vanin 2 (VNN2), transcript variant 1, mRNA [NM_004665]	chr6:133065225-133065166	hs|6q23.2	AAAGAGCCTGGGTGTTTGGGTCAGATAAATGAAGATCAAACTCCAGCTCCAGCCTCATTT
A_23_P122852	SMARCD3	6604	NM_003078	43.5089	8.38956	42.2654	9.08756	6.09836	11.5416	6.77968	12.1811	74.1854	3012.59	87.6449	4375.97	P	P	P	P	0	NM_003078	NM_003078	Hs.647067	SWI/SNF related, matrix associated, actin dependent regulator of chromatin, subfamily d, member 3	ENST00000356800	THC2518455	GO:0000790(nuclear chromatin)|GO:0002052(positive regulation of neuroblast proliferation)|GO:0003139(secondary heart field specification)|GO:0003219(cardiac right ventricle formation)|GO:0003407(neural retina development)|GO:0003713(transcription coactivator activity)|GO:0005102(receptor binding)|GO:0005515(protein binding)|GO:0005634(nucleus)|GO:0005654(nucleoplasm)|GO:0005737(cytoplasm)|GO:0006…	Homo sapiens SWI/SNF related, matrix associated, actin dependent regulator of chromatin, subfamily d, member 3 (SMARCD3), transcript variant 2, mRNA [NM_003078]	chr7:150936124-150936065	hs|7q36.1	GGGCTCCAGCATCACTCCTCTGCCACCTTGGGGTGTGGGGCTGGATTAAAAGTCATTCAT
A_23_P122906	AUTS2	26053	NM_015570	5.21315	10.3147	-4.34426	12.4694	9.19219	11.5743	13.5739	11.4548	702.892	3081.54	9907.68	2677.76	P	P	P	P	0	NM_015570	NM_015570	Hs.21631	autism susceptibility candidate 2	ENST00000611706	NP651821	GO:0003674(molecular_function)|GO:0005575(cellular_component)|GO:0008150(biological_process)	Homo sapiens autism susceptibility candidate 2 (AUTS2), transcript variant 1, mRNA [NM_015570]	chr7:70257414-70257473	hs|7q11.22	AGTTCCATTTGGTCTTCTAGTATATTAAAGTGCTATCTGACGTTGTTATCCTGTTTTTGC
A_23_P123086	PSMG3-AS1	114796	NR_027329	1.77461	7.67276	-4.61698	7.48316	7.27015	8.09765	8.66756	6.46061	171.458	308.079	319.799	87.3055	P	P	P	P	0	NR_027329	NR_027329	Hs.436146	PSMG3 antisense RNA 1 (head to head)	ENST00000457484	THC2500501		Homo sapiens PSMG3 antisense RNA 1 (head to head) (PSMG3-AS1), transcript variant 1, long non-coding RNA [NR_027329]	chr7:1628857-1628916	hs|7p22.3	GGCAGTCTGGTCTAGAGGGTCCATGATGGCTTTACTCACATGCCTGGCATCTTGACAGGG
A_23_P12392	PTPRC	5788	NR_052021	18.8004	8.65703	11.0951	9.41592	6.79562	11.0283	7.83867	11.3105	121.444	2157.7	180.299	2425.59	P	P	P	P	0	NR_052021	NR_052021	Hs.654514	protein tyrosine phosphatase, receptor type, C	ENST00000367364	THC2479594	GO:0001915(negative regulation of T cell mediated cytotoxicity)|GO:0001960(negative regulation of cytokine-mediated signaling pathway)|GO:0002244(hemopoietic progenitor cell differentiation)|GO:0002378(immunoglobulin biosynthetic process)|GO:0004725(protein tyrosine phosphatase activity)|GO:0005001(transmembrane receptor protein tyrosine phosphatase activity)|GO:0005515(protein binding)|GO:000588…	Homo sapiens protein tyrosine phosphatase, receptor type, C (PTPRC), transcript variant 4, non-coding RNA [NR_052021]	chr1:198662240-198662299	hs|1q31.3	GGTAATGCACAATTCCAACTAACGTACATTCAACAGATCATGAAATTGGGTTATTAAAAT
A_23_P124108	ITGAM	3684	NM_000632	121.74	8.73343	94.9732	8.46405	5.93143	12.8591	5.79434	12.3638	66.1883	7288.25	44.333	4951.32	P	P	P	P	0	NM_000632	NM_000632	Hs.172631	integrin, alpha M (complement component 3 receptor 3 subunit)	ENST00000544665	NP1472148	GO:0001846(opsonin binding)|GO:0001948(glycoprotein binding)|GO:0002224(toll-like receptor signaling pathway)|GO:0002523(leukocyte migration involved in inflammatory response)|GO:0005515(protein binding)|GO:0005634(nucleus)|GO:0005886(plasma membrane)|GO:0007155(cell adhesion)|GO:0007229(integrin-mediated signaling pathway)|GO:0007596(blood coagulation)|GO:0008201(heparin binding)|GO:0008305(inte…	Homo sapiens integrin, alpha M (complement component 3 receptor 3 subunit) (ITGAM), transcript variant 2, mRNA [NM_000632]	chr16:31343816-31343875	hs|16p11.2	GTCTCCCTTTCCAGATATTCAAGTCACCTCCTTAAAGGTAGTCAAGATTGTGTTTTGAGG
A_23_P124122	PXMP2	5827	NM_018663	-10.5348	10.3102	-13.4258	10.0331	12.1477	8.75066	12.08	8.33308	6047.24	468.925	3437.7	320.718	P	P	P	P	0	NM_018663	NM_018663	Hs.430299	peroxisomal membrane protein 2, 22kDa	ENST00000539093	THC2470599	GO:0005515(protein binding)|GO:0005737(cytoplasm)|GO:0005739(mitochondrion)|GO:0005778(peroxisomal membrane)|GO:0008150(biological_process)|GO:0016020(membrane)|GO:0016021(integral to membrane)|GO:0043234(protein complex)	Homo sapiens peroxisomal membrane protein 2, 22kDa (PXMP2), mRNA [NM_018663]	chr12:133281412-133281470	hs|12q24.33	AGAAACAGAAATCTCTGAATGTCAGAAACCCTGTCTTTTAAAAAGGCAGTCACTGCCTTC
A_23_P124642	RASGRP1	10125	NM_005739	3.66333	12.0582	6.42481	11.459	11.158	13.0311	10.1955	12.8791	2958.04	8134.7	938.09	7024.48	P	P	P	P	0	NM_005739	NM_005739	Hs.591127	RAS guanyl releasing protein 1 (calcium and DAG-regulated)	ENST00000539159	NP1473840	GO:0000139(Golgi membrane)|GO:0001816(cytokine production)|GO:0002437(inflammatory response to antigenic stimulus)|GO:0005085(guanyl-nucleotide exchange factor activity)|GO:0005509(calcium ion binding)|GO:0005789(endoplasmic reticulum membrane)|GO:0005829(cytosol)|GO:0005886(plasma membrane)|GO:0007165(signal transduction)|GO:0007265(Ras protein signal transduction)|GO:0007596(blood coagulation)|…	Homo sapiens RAS guanyl releasing protein 1 (calcium and DAG-regulated) (RASGRP1), transcript variant 1, mRNA [NM_005739]	chr15:38780497-38780438	hs|15q14	ATTAACAGCAGGGTCACTTCTCATTTTCTTTGCTGACTTACCTTTTTACTGACCGTTGTG
A_23_P125078	SLC26A11	284129	NM_173626	9.08558	11.0011	2.63356	11.6291	9.52391	12.7075	10.9516	12.3486	894.246	6578.7	1555.58	4901.36	P	P	P	P	0	NM_173626	NM_173626	Hs.4866	solute carrier family 26 (anion exchanger), member 11	ENST00000411502	THC2467767	GO:0005765(lysosomal membrane)|GO:0005783(endoplasmic reticulum)|GO:0005794(Golgi apparatus)|GO:0005886(plasma membrane)|GO:0008271(secondary active sulfate transmembrane transporter activity)|GO:0008272(sulfate transport)|GO:0008509(anion transmembrane transporter activity)|GO:0015301(anion:anion antiporter activity)|GO:0016021(integral to membrane)|GO:0070062(extracellular vesicular exosome)	Homo sapiens solute carrier family 26 (anion exchanger), member 11 (SLC26A11), transcript variant 2, mRNA [NM_173626]	chr17:78227156-78227215	hs|17q25.3	TACCTGTCCGTCAGTGTGTGGATGTATGTTTACAGTTCTACATAAATGGGATCATTTTAT
A_23_P12526	TP53BP2	7159	NM_005426	1.44489	9.29484	17.4811	7.97504	9.03315	9.56412	6.1739	10.3016	624.28	805.294	57.3879	1209.21	P	P	P	P	0	NM_005426	NM_005426	Hs.523968	tumor protein p53 binding protein 2	ENST00000391878	THC2485922	GO:0005070(SH3/SH2 adaptor activity)|GO:0005515(protein binding)|GO:0005634(nucleus)|GO:0005737(cytoplasm)|GO:0007049(cell cycle)|GO:0007165(signal transduction)|GO:0007417(central nervous system development)|GO:0007507(heart development)|GO:0009792(embryo development ending in birth or egg hatching)|GO:0009967(positive regulation of signal transduction)|GO:0010212(response to ionizing radiation)…	Homo sapiens tumor protein p53 binding protein 2 (TP53BP2), transcript variant 2, mRNA [NM_005426]	chr1:223968290-223968231	hs|1q41	GACAATCCTGTTTTCTACAAGAATCCTGTCTAGTAAATAGGATCATTTATTGGGCAGTTG
A_23_P125423	C1R	715	NM_001733	-2.4812	6.10091	-5.66362	6.82502	6.79155	5.4805	8.18956	5.68784	121.083	52.9688	230.79	50.8553	P	P	P	P	0	NM_001733	NM_001733	Hs.524224	complement component 1, r subcomponent	ENST00000540394	THC2498629	GO:0004252(serine-type endopeptidase activity)|GO:0005509(calcium ion binding)|GO:0005515(protein binding)|GO:0005576(extracellular region)|GO:0006508(proteolysis)|GO:0006955(immune response)|GO:0006956(complement activation)|GO:0006958(complement activation, classical pathway)|GO:0008236(serine-type peptidase activity)|GO:0045087(innate immune response)|GO:0070062(extracellular vesicular exosome…	Homo sapiens complement component 1, r subcomponent (C1R), mRNA [NM_001733]	chr12:7187626-7187567	hs|12p13.31	AGGATATAGTTATCAATCTCTAGTTGTCACTTTCCTCTTCCACTTTGATACCATTGGGTC
A_23_P125748	ZMAT1	84460	NM_001282400	11.7713	8.2104	2.24901	9.62669	6.62223	10.1794	9.05978	10.2291	107.793	1205.67	418.6	1154.24	P	P	P	P	0	NM_001282400	NM_001282400	Hs.496512	zinc finger, matrin-type 1	ENST00000488347	THC2626945	GO:0003677(DNA binding)|GO:0005634(nucleus)|GO:0008270(zinc ion binding)	Homo sapiens zinc finger, matrin-type 1 (ZMAT1), transcript variant 2, mRNA [NM_001282400]	chrX:101138913-101138854	hs|Xq22.1	CCAGTACCCTTGAGCCTTAATCAGCAAGAAAATAACTCTGGCTCATACAGTGTAGAATCT
A_23_P126103	CTH	1491	NM_001902	-25.3616	9.07775	-2.19383	8.81679	11.7049	7.04028	9.40171	8.26826	4428.74	151.451	534.878	307.734	P	P	P	P	0	NM_001902	NM_001902	Hs.19904	cystathionine gamma-lyase	ENST00000370938	THC2470813	GO:0000096(sulfur amino acid metabolic process)|GO:0000098(sulfur amino acid catabolic process)|GO:0004123(cystathionine gamma-lyase activity)|GO:0005515(protein binding)|GO:0005516(calmodulin binding)|GO:0005634(nucleus)|GO:0005654(nucleoplasm)|GO:0005737(cytoplasm)|GO:0005829(cytosol)|GO:0006534(cysteine metabolic process)|GO:0016846(carbon-sulfur lyase activity)|GO:0018272(protein-pyridoxal-5-…	Homo sapiens cystathionine gamma-lyase (CTH), transcript variant 1, mRNA [NM_001902]	chr1:70905041-70905100	hs|1p31.1	ATGTTTGCCTCTGAAGGAGGTGAGATTTGTGCTACTTTGGGAGATTATGTTCTTTTTTCA
A_23_P126388	SH3BGRL3	83442	NM_031286	4.5302	14.7099	4.46708	14.9406	13.6604	15.84	13.8999	16.0592	17897.9	55848.9	12584.2	60022.1	P	P	P	P	0	NM_031286	NM_031286	Hs.109051	SH3 domain binding glutamate-rich protein like 3	ENST00000319041	THC2562189	GO:0005100(Rho GTPase activator activity)|GO:0005634(nucleus)|GO:0005737(cytoplasm)|GO:0009055(electron carrier activity)|GO:0015035(protein disulfide oxidoreductase activity)|GO:0030027(lamellipodium)|GO:0030215(semaphorin receptor binding)|GO:0030834(regulation of actin filament depolymerization)|GO:0032321(positive regulation of Rho GTPase activity)|GO:0032956(regulation of actin cytoskeleton …	Homo sapiens SH3 domain binding glutamate-rich protein like 3 (SH3BGRL3), mRNA [NM_031286]	chr1:26607808-26607867	hs|1p36.11	CCTTACCCATTAGTCTCAGAAATTGTCTTAAGCAACAGCCCCAAATGCTGGCTGCCCCCA
A_23_P126593	S100A11	6282	NM_005620	8.08264	11.1066	9.52144	11.2018	9.70105	12.7159	9.69357	12.9448	1021.75	6619.8	661.326	7362.19	P	P	P	P	0	NM_005620	NM_005620	Hs.417004	S100 calcium binding protein A11	ENST00000271638	THC2562445	GO:0001726(ruffle)|GO:0005509(calcium ion binding)|GO:0005515(protein binding)|GO:0005615(extracellular space)|GO:0005634(nucleus)|GO:0005654(nucleoplasm)|GO:0005737(cytoplasm)|GO:0007165(signal transduction)|GO:0008156(negative regulation of DNA replication)|GO:0008285(negative regulation of cell proliferation)|GO:0042803(protein homodimerization activity)|GO:0044548(S100 protein binding)|GO:004…	Homo sapiens S100 calcium binding protein A11 (S100A11), mRNA [NM_005620]	chr1:152005278-152005219	hs|1q21.3	CTTGACCGCATGATGAAGAAACTGGACACCAACAGTGATGGTCAGCTAGATTTCTCAGAA
A_23_P12680	PSAP	5660	NM_001042465	7.53408	13.1888	9.12958	13.5196	11.8123	14.7258	12.0182	15.2087	4785.92	25699.1	3300.26	33571.3	P	P	P	P	0	NM_001042465	NM_001042465	Hs.523004	prosaposin	ENST00000394934	THC2557296	GO:0002576(platelet degranulation)|GO:0005515(protein binding)|GO:0005576(extracellular region)|GO:0005615(extracellular space)|GO:0005654(nucleoplasm)|GO:0005730(nucleolus)|GO:0005739(mitochondrion)|GO:0005765(lysosomal membrane)|GO:0005794(Golgi apparatus)|GO:0006665(sphingolipid metabolic process)|GO:0006687(glycosphingolipid metabolic process)|GO:0006869(lipid transport)|GO:0007596(blood coag…	Homo sapiens prosaposin (PSAP), transcript variant 2, mRNA [NM_001042465]	chr10:73577030-73576971	hs|10q22.1	CCCTAGCCCCTGGCAGACATAGCTGCTTCAGTGCCCCTTTTCTCTCTGCTAGATGGATGT
A_23_P126844	TNFRSF25	8718	NM_148965	417.677	8.84434	169.115	8.98284	5.50447	14.2107	6.01443	13.4163	48.8614	18017	51.3878	10203	P	P	P	P	0	NM_148965	NM_148965	Hs.462529	tumor necrosis factor receptor superfamily, member 25	ENST00000513135	NP1145497	GO:0004872(receptor activity)|GO:0005031(tumor necrosis factor-activated receptor activity)|GO:0005576(extracellular region)|GO:0005829(cytosol)|GO:0005886(plasma membrane)|GO:0005887(integral to plasma membrane)|GO:0006915(apoptotic process)|GO:0007165(signal transduction)|GO:0007166(cell surface receptor signaling pathway)|GO:0033209(tumor necrosis factor-mediated signaling pathway)|GO:0042981(…	Homo sapiens tumor necrosis factor receptor superfamily, member 25 (TNFRSF25), transcript variant 1, mRNA [NM_148965]	chr1:6521304-6521245	hs|1p36.31	CGAGAGGGGGTGAAGACATTTCTCAACTTCTCGGCCGGAGTTTGGCTGAGATCGCGGTAT
A_23_P126888	KIF21B	23046	NM_017596	5.14999	10.5585	14.1453	9.49835	9.44219	11.8068	7.77758	11.5998	843.316	3594.11	172.587	2961.62	P	P	P	P	0	NM_017596	NM_017596	Hs.169182	kinesin family member 21B	ENST00000332129	THC2463262	GO:0003777(microtubule motor activity)|GO:0005524(ATP binding)|GO:0005737(cytoplasm)|GO:0005871(kinesin complex)|GO:0005874(microtubule)|GO:0007018(microtubule-based movement)|GO:0008017(microtubule binding)|GO:0008152(metabolic process)|GO:0016887(ATPase activity)	Homo sapiens kinesin family member 21B (KIF21B), transcript variant 2, mRNA [NM_017596]	chr1:200939143-200939084	hs|1q32.1	TTCCCACTGTGTGTCCCGGACCTGTGGTATGTGTCCCTTTGCCATCCCAAACAGGCAACT
A_23_P127288	IL2RA	3559	NM_000417	-8.5006	8.0923	1.51047	6.9891	9.78202	6.69446	6.69793	7.29293	1083.96	120.032	83.3117	156.905	P	P	P	P	0	NM_000417	NM_000417	Hs.231367	interleukin 2 receptor, alpha	ENST00000379954	THC2489292	GO:0002437(inflammatory response to antigenic stimulus)|GO:0004911(interleukin-2 receptor activity)|GO:0005886(plasma membrane)|GO:0006915(apoptotic process)|GO:0006924(activation-induced cell death of T cells)|GO:0006954(inflammatory response)|GO:0006955(immune response)|GO:0007166(cell surface receptor signaling pathway)|GO:0007219(Notch signaling pathway)|GO:0008144(drug binding)|GO:0008283(ce…	Homo sapiens interleukin 2 receptor, alpha (IL2RA), mRNA [NM_000417]	chr10:6054565-6054506	hs|10p15.1	CTCCATCTTATTTTCATGTATATGTGTTCATTAAAGCATGAATGGTATGGAACTCTCTCC
A_23_P127385	MYBPC3	4607	NM_000256	5.36098	6.69041	3.92319	6.95901	5.58793	8.01042	6.0425	8.01453	51.62	290.341	52.504	258.678	P	P	P	P	0	NM_000256	NM_000256	Hs.524906	myosin binding protein C, cardiac	ENST00000256993	THC2783036	GO:0001671(ATPase activator activity)|GO:0002027(regulation of heart rate)|GO:0003007(heart morphogenesis)|GO:0003779(actin binding)|GO:0005829(cytosol)|GO:0005863(striated muscle myosin thick filament)|GO:0006942(regulation of striated muscle contraction)|GO:0007155(cell adhesion)|GO:0008307(structural constituent of muscle)|GO:0014705(C zone)|GO:0017022(myosin binding)|GO:0030017(sarcomere)|GO:…	Homo sapiens myosin binding protein C, cardiac (MYBPC3), mRNA [NM_000256]	chr11:47353223-47353164	hs|11p11.2	TGGGGAAACCCCTCCCTACTGTTGGATGTATGTGTGACAAGTGTGTCTCCTGTGCTGCGA
A_23_P127663	PRRG4	79056	NM_024081	-5.03362	6.08465	2.0945	5.46712	7.36113	5.02953	4.95977	6.02637	183.866	38.9139	24.6925	64.3561	P	P	P	P	0	NM_024081	NM_024081	Hs.471695	proline rich Gla (G-carboxyglutamic acid) 4 (transmembrane)	ENST00000257836	THC2477777	GO:0003674(molecular_function)|GO:0005509(calcium ion binding)|GO:0005576(extracellular region)|GO:0008150(biological_process)|GO:0016021(integral to membrane)	Homo sapiens proline rich Gla (G-carboxyglutamic acid) 4 (transmembrane) (PRRG4), mRNA [NM_024081]	chr11:32875016-32875075	hs|11p13	TGGGCACACAAAAGGATTTAGGGTATTTAAAAAATCTATGTCTCTCCCATCTCACTGACT
A_23_P12784	FRAT2	23401	NM_012083	5.60295	10.3281	4.04503	10.8102	9.15956	11.6457	9.84905	11.8652	686.98	3222.33	737.494	3546.8	P	P	P	P	0	NM_012083	NM_012083	Hs.140720	frequently rearranged in advanced T-cell lymphomas 2	ENST00000371019	THC2618275	GO:0003674(molecular_function)|GO:0005575(cellular_component)|GO:0005829(cytosol)|GO:0007275(multicellular organismal development)|GO:0008283(cell proliferation)|GO:0016055(Wnt receptor signaling pathway)|GO:0090263(positive regulation of canonical Wnt receptor signaling pathway)	Homo sapiens frequently rearranged in advanced T-cell lymphomas 2 (FRAT2), mRNA [NM_012083]	chr10:99092464-99092405	hs|10q24.1	CTGTATGAAACTTGACGGCGCTTTTGTAAGGTGCCACCCCCAAACTTTAAGGTAGCTAAA
A_23_P127948	ADM	133	NM_001124	-3.54236	10.3721	22.8845	9.01207	11.3245	9.49977	7.03253	11.5488	3327.66	775.584	103.521	2854.12	P	P	P	P	0	NM_001124	NM_001124	Hs.441047	adrenomedullin	ENST00000528655	THC2591417	GO:0001570(vasculogenesis)|GO:0001666(response to hypoxia)|GO:0001843(neural tube closure)|GO:0002026(regulation of the force of heart contraction)|GO:0002031(G-protein coupled receptor internalization)|GO:0005102(receptor binding)|GO:0005179(hormone activity)|GO:0005515(protein binding)|GO:0005576(extracellular region)|GO:0005615(extracellular space)|GO:0005737(cytoplasm)|GO:0006171(cAMP biosynt…	Homo sapiens adrenomedullin (ADM), mRNA [NM_001124]	chr11:10328780-10328839	hs|11p15.4	GTGTAAAGTTGTTCGCCGCGTGGAATGTGAGTGTGTTTGTGTGCATGAAAGAGAAAGACT
A_23_P128147	TUBA1B	10376	NM_006082	-4.60419	15.6272	-2.37601	15.1057	16.7675	14.5645	15.7429	14.4943	131786	22948.2	50371.5	21541.6	P	P	P	P	0	NM_006082	NM_006082	Hs.524390	tubulin, alpha 1b	ENST00000547765	THC2529286	GO:0000226(microtubule cytoskeleton organization)|GO:0003725(double-stranded RNA binding)|GO:0003924(GTPase activity)|GO:0005198(structural molecule activity)|GO:0005200(structural constituent of cytoskeleton)|GO:0005515(protein binding)|GO:0005525(GTP binding)|GO:0005874(microtubule)|GO:0005881(cytoplasmic microtubule)|GO:0006184(GTP catabolic process)|GO:0006457(protein folding)|GO:0007017(micr…	Homo sapiens tubulin, alpha 1b (TUBA1B), mRNA [NM_006082]	chr12:49521692-49521633	hs|12q13.12	GCTTCAGCTTAACTGACAGATGTTAAAGCTTTCTGGTTAGATTGTTTTCACTTGGTGATC
A_23_P12816	HELLS	3070	NM_018063	-15.4177	8.35476	-7.58487	8.10769	10.5579	6.61136	9.69994	6.77681	1910.82	113.015	664.229	108.343	P	P	P	P	0	NM_018063	NM_018063	Hs.655830	helicase, lymphoid-specific	ENST00000394036	NP1074106	GO:0000775(chromosome, centromeric region)|GO:0003677(DNA binding)|GO:0004386(helicase activity)|GO:0005515(protein binding)|GO:0005524(ATP binding)|GO:0005634(nucleus)|GO:0005721(centromeric heterochromatin)|GO:0006346(methylation-dependent chromatin silencing)|GO:0006351(transcription, DNA-dependent)|GO:0007067(mitosis)|GO:0007275(multicellular organismal development)|GO:0010216(maintenance of …	Homo sapiens helicase, lymphoid-specific (HELLS), transcript variant 1, mRNA [NM_018063]	chr10:96354481-96354540	hs|10q23.33	TAGATGTCATAGAATTGGTCAGACAAAGCCAGTTGTTGTTTATCGCCTTGTTACAGCAAA
A_23_P128215	SOCS2	8835	NM_003877	1.18386	9.69306	-10.5272	10.2233	9.57207	9.81558	12.0614	8.66532	925.413	953.207	3397.72	398.943	P	P	P	P	0	NM_003877	NM_003877	Hs.737206	suppressor of cytokine signaling 2	ENST00000549206	THC2495423	GO:0001558(regulation of cell growth)|GO:0004860(protein kinase inhibitor activity)|GO:0005070(SH3/SH2 adaptor activity)|GO:0005131(growth hormone receptor binding)|GO:0005159(insulin-like growth factor receptor binding)|GO:0005515(protein binding)|GO:0005737(cytoplasm)|GO:0005829(cytosol)|GO:0006469(negative regulation of protein kinase activity)|GO:0007259(JAK-STAT cascade)|GO:0007568(aging)|GO…	Homo sapiens suppressor of cytokine signaling 2 (SOCS2), transcript variant 1, mRNA [NM_003877]	chr12:93969799-93969858	hs|12q22	CCAAGTTGTCCTTGAATTGTCTAACCATGGACATAAACAGTTGTCTCCCTTCTACTGTGT
A_23_P128246	FICD	11153	NM_007076	-3.91702	8.93782	-6.75641	8.89384	9.9768	8.00704	10.3781	7.62185	1251.36	289.545	1060.02	197.128	P	P	P	P	0	NM_007076	NM_007076	Hs.661891	FIC domain containing	ENST00000552695	THC2473829	GO:0005524(ATP binding)|GO:0016021(integral to membrane)|GO:0018117(protein adenylylation)|GO:0034259(negative regulation of Rho GTPase activity)|GO:0070733(protein adenylyltransferase activity)	Homo sapiens FIC domain containing (FICD), mRNA [NM_007076]	chr12:108913068-108913127	hs|12q23.3	ACTACTACCACGTGTTGGAAGCTGCCAACGAGGGCGACGTGAGGCCTTTCATTCGCTTCA
A_23_P128613	KDELC1	79070	NM_024089	-6.71605	6.48903	-12.1383	6.617	8.00667	5.25906	8.6584	5.0569	289.479	45.2848	317.846	33.121	P	P	P	P	0	NM_024089	NM_024089	Hs.408629	KDEL (Lys-Asp-Glu-Leu) containing 1	ENST00000484943	THC2613498	GO:0005788(endoplasmic reticulum lumen)	Homo sapiens KDEL (Lys-Asp-Glu-Leu) containing 1 (KDELC1), mRNA [NM_024089]	chr13:103436747-103436688	hs|13q33.1	AATCTGTGTGATTGTTTGCAGTATGAAGACACATTTCTACTTATGCAGTATTCTCATGAC
A_23_P128663	SACS	26278	NM_014363	-1.97999	11.063	-4.21736	10.4692	11.5667	10.5812	11.5587	9.48235	4012.47	1589.95	2370.73	697.415	P	P	P	P	0	NM_014363	NM_014363	Hs.159492	sacsin molecular chaperone	ENST00000382292	NP843920	GO:0005634(nucleus)|GO:0005737(cytoplasm)|GO:0005739(mitochondrion)|GO:0006457(protein folding)|GO:0030424(axon)|GO:0030425(dendrite)|GO:0030544(Hsp70 protein binding)|GO:0051087(chaperone binding)|GO:0070628(proteasome binding)|GO:0070852(cell body fiber)|GO:0090084(negative regulation of inclusion body assembly)	Homo sapiens sacsin molecular chaperone (SACS), transcript variant 1, mRNA [NM_014363]	chr13:23903098-23903039	hs|13q12.12	TTTACTTTTATTGGGAATAAGGAATGTTTGCACCTCCACATTTTATTGCTTCTGGATGTG
A_23_P128974	BATF	10538	NM_006399	-2.15702	14.0908	-6.06224	13.3103	14.6563	13.5472	14.6735	12.0737	34462.8	11510.2	22189.3	4091.32	P	P	P	P	0	NM_006399	NM_006399	Hs.509964	basic leucine zipper transcription factor, ATF-like	ENST00000286639	THC2473916	GO:0001816(cytokine production)|GO:0002320(lymphoid progenitor cell differentiation)|GO:0003700(sequence-specific DNA binding transcription factor activity)|GO:0005515(protein binding)|GO:0005634(nucleus)|GO:0005737(cytoplasm)|GO:0006351(transcription, DNA-dependent)|GO:0006357(regulation of transcription from RNA polymerase II promoter)|GO:0006974(response to DNA damage stimulus)|GO:0030330(DNA …	Homo sapiens basic leucine zipper transcription factor, ATF-like (BATF), mRNA [NM_006399]	chr14:76013251-76013310	hs|14q24.3	TATTAAGAAAGATGCTCAAGTCCCATGGCACAGAGCAAGGCGGGCAGGGAACGGTTATTT
A_23_P129014	EFCAB11	90141	NM_145231	-11.8965	7.62014	-10.2615	7.41087	9.61293	6.04047	9.27839	5.91923	953.748	77.2876	491.05	59.3011	P	P	P	P	0	NM_145231	NM_145231	Hs.123232	EF-hand calcium binding domain 11	ENST00000553871	THC2474191	GO:0005509(calcium ion binding)	Homo sapiens EF-hand calcium binding domain 11 (EFCAB11), transcript variant 1, mRNA [NM_145231]	chr14:90263611-90263552	hs|14q32.11	GAACTATGGACAGAAGGAAGCCTAACTATTGTGAACTACTTTTGGTAACTCTGGGGAGAT
A_23_P129064	GATM	2628	NM_001482	-25.9177	8.98617	-16.2204	8.95925	11.6358	6.93991	11.1918	7.17206	4202.21	142.143	1838.57	143.571	P	P	P	P	0	NM_001482	NM_001482	Hs.75335	glycine amidinotransferase (L-arginine:glycine amidinotransferase)	ENST00000558362	THC2508813	GO:0005743(mitochondrial inner membrane)|GO:0005758(mitochondrial intermembrane space)|GO:0006600(creatine metabolic process)|GO:0006601(creatine biosynthetic process)|GO:0006979(response to oxidative stress)|GO:0007584(response to nutrient)|GO:0015068(glycine amidinotransferase activity)|GO:0016813(hydrolase activity, acting on carbon-nitrogen (but not peptide) bonds, in linear amidines)|GO:0034…	Homo sapiens glycine amidinotransferase (L-arginine:glycine amidinotransferase) (GATM), mRNA [NM_001482]	chr15:45653514-45653455	hs|15q21.1	AATATCTGATAGATACACTGCATCTTTGGTCATCTAAGATTTGTTTACAAATGTGCAAAT
A_23_P129075	WDR76	79968	NM_024908	-5.48022	6.72589	-4.75764	5.78908	8.06404	5.6098	7.02252	4.77228	301.433	57.9428	102.758	27.1632	P	P	P	P	0	NM_024908	NM_024908	Hs.250154	WD repeat domain 76	ENST00000478130	THC2479440		Homo sapiens WD repeat domain 76 (WDR76), transcript variant 1, mRNA [NM_024908]	chr15:44158615-44158674	hs|15q15.3	TGTTCAAATTGACCACTGTCTAAGGAGCCTAGTAATCGGCGTGCCTTAGTGTGTTTATGT
A_23_P129103	GOLGA2P7	388152	NR_027001	-2.71124	11.1544	-12.5753	11.5868	11.8971	10.4581	13.5561	9.90354	5089.31	1466.37	9760.05	916.647	P	P	P	P	0	NR_027001	NR_027001	Hs.405809	golgin A2 pseudogene 7	ENST00000316967	THC2476453		Homo sapiens golgin A2 pseudogene 7 (GOLGA2P7), non-coding RNA [NR_027001]	chr15:84868255-84868196	hs|15q25.2	TGGGACTGTGCGCTGGACTTGGAGCCCCTTGGAGTATGGCTTTTCACACGGGCTTCTATA
A_23_P12911	C11orf24	53838	NM_022338	-3.24144	11.4921	-7.53466	11.7453	12.3717	10.6751	13.2921	10.3786	7129.48	1699.47	8191.78	1271.74	P	P	P	P	0	NM_022338	NM_022338	Hs.303025	chromosome 11 open reading frame 24	ENST00000304271	THC2613960	GO:0005794(Golgi apparatus)|GO:0005886(plasma membrane)|GO:0016021(integral to membrane)	Homo sapiens chromosome 11 open reading frame 24 (C11orf24), transcript variant 1, mRNA [NM_022338]	chr11:68029070-68029011	hs|11q13.2	CTTTCCTTTTGCCTTTGAGACCAAACCAAGTGCTTCCAAATTCTTTTGGTGCAATTGAGG
A_23_P129157	NEIL1	79661	NM_024608	13.1382	8.318	3.2069	9.60932	6.6651	10.3808	8.80543	10.4866	110.765	1392.24	351.286	1372.95	P	P	P	P	0	NM_024608	NM_024608	Hs.512732	nei endonuclease VIII-like 1 (E. coli)	ENST00000567393	NP1155383	GO:0000737(DNA catabolic process, endonucleolytic)|GO:0003684(damaged DNA binding)|GO:0003906(DNA-(apurinic or apyrimidinic site) lyase activity)|GO:0005634(nucleus)|GO:0005654(nucleoplasm)|GO:0005694(chromosome)|GO:0005737(cytoplasm)|GO:0005815(microtubule organizing center)|GO:0006284(base-excision repair)|GO:0006289(nucleotide-excision repair)|GO:0006979(response to oxidative stress)|GO:000802…	Homo sapiens nei endonuclease VIII-like 1 (E. coli) (NEIL1), transcript variant 2, mRNA [NM_024608]	chr15:75647373-75647432	hs|15q24.2	TAGCAGGAGGCTCTCCTTGCTTGCACTCACCCTTTCTTATTGTCTTGCCCTGCATCTGGG
A_23_P129221	FAH	2184	NM_000137	-3.86148	10.4011	-4.74592	10.0254	11.4212	9.47204	11.2115	8.9648	3584.86	762.944	1864.31	494.721	P	P	P	P	0	NM_000137	NM_000137	Hs.73875	fumarylacetoacetate hydrolase (fumarylacetoacetase)	ENST00000561421	THC2467191	GO:0004334(fumarylacetoacetase activity)|GO:0005829(cytosol)|GO:0006527(arginine catabolic process)|GO:0006559(L-phenylalanine catabolic process)|GO:0006572(tyrosine catabolic process)|GO:0034641(cellular nitrogen compound metabolic process)|GO:0044281(small molecule metabolic process)|GO:0046872(metal ion binding)|GO:0070062(extracellular vesicular exosome)	Homo sapiens fumarylacetoacetate hydrolase (fumarylacetoacetase) (FAH), mRNA [NM_000137]	chr15:80467376-80469880	hs|15q25.1	TATCTGTGCCATGACGAGCCCTACACATTTGACATCAACCTCTCTGTTAACCTGAAAGGA
A_23_P129389	ZDHHC7	55625	NM_017740	3.56036	10.838	4.13182	11.2954	9.96065	11.7927	10.3183	12.3651	1236.8	3547.35	1021.8	4958.9	P	P	P	P	0	NM_017740	NM_017740	Hs.461610	zinc finger, DHHC-type containing 7	ENST00000313732	THC2461043	GO:0005634(nucleus)|GO:0005654(nucleoplasm)|GO:0005730(nucleolus)|GO:0005794(Golgi apparatus)|GO:0008270(zinc ion binding)|GO:0016021(integral to membrane)|GO:0016409(palmitoyltransferase activity)|GO:0018230(peptidyl-L-cysteine S-palmitoylation)|GO:0018345(protein palmitoylation)|GO:0019706(protein-cysteine S-palmitoleyltransferase activity)|GO:0043231(intracellular membrane-bounded organelle)	Homo sapiens zinc finger, DHHC-type containing 7 (ZDHHC7), transcript variant 2, mRNA [NM_017740]	chr16:85008687-85008628	hs|16q24.1	GCCTTGCCTTAAACTTGCCTGGTTTGTACATTTTTTGCCGGACGCATCAAGAAGCAATCT
A_23_P129433	SLC9A5	6553	NM_004594	-2.25451	7.64222	-9.66316	8.53859	8.25109	7.07828	10.3302	7.0577	347.259	155.129	1029.34	131.508	P	P	P	P	0	NM_004594	NM_004594	Hs.439650	solute carrier family 9, subfamily A (NHE5, cation proton antiporter 5), member 5	ENST00000564704	THC2602449	GO:0005886(plasma membrane)|GO:0006810(transport)|GO:0006811(ion transport)|GO:0006885(regulation of pH)|GO:0015385(sodium:hydrogen antiporter activity)|GO:0016021(integral to membrane)|GO:0035725(sodium ion transmembrane transport)|GO:0055085(transmembrane transport)	Homo sapiens solute carrier family 9, subfamily A (NHE5, cation proton antiporter 5), member 5 (SLC9A5), mRNA [NM_004594]	chr16:67306015-67306074	hs|16q22.1	CAGGTGACTTTCTAGGGATCAGCACCTGCCCTGTGTTTTGTACCTTGAACCTAAGATATA
A_23_P129458	SDR42E1	93517	NM_145168	-4.62422	7.27953	-8.8751	6.67271	8.46747	6.25826	8.43093	5.28116	409.003	88.759	270.486	38.3898	P	P	P	P	0	NM_145168	NM_145168	Hs.87779	short chain dehydrogenase/reductase family 42E, member 1	ENST00000328945	THC2601972	GO:0003854(3-beta-hydroxy-delta5-steroid dehydrogenase activity)|GO:0006694(steroid biosynthetic process)|GO:0016021(integral to membrane)|GO:0055114(oxidation-reduction process)	Homo sapiens short chain dehydrogenase/reductase family 42E, member 1 (SDR42E1), mRNA [NM_145168]	chr16:82031603-82031544	hs|16q23.3	CAGAAAGGATAGTATGGGAACATTACAAGGGGGATACATTACTGTGGAAAGTTCTGCTAG
A_23_P129556	IL4R	3566	NM_000418	4.14143	13.6099	4.96194	13.2416	12.6234	14.6735	12.1365	14.4474	8486.38	24592.9	3597.53	20688	P	P	P	P	0	NM_000418	NM_000418	Hs.513457	interleukin 4 receptor	ENST00000170630	THC2467328	GO:0002532(production of molecular mediator involved in inflammatory response)|GO:0004913(interleukin-4 receptor activity)|GO:0005057(receptor signaling protein activity)|GO:0005515(protein binding)|GO:0005615(extracellular space)|GO:0005887(integral to plasma membrane)|GO:0006955(immune response)|GO:0007165(signal transduction)|GO:0030728(ovulation)|GO:0035556(intracellular signal transduction)|…	Homo sapiens interleukin 4 receptor (IL4R), transcript variant 1, mRNA [NM_000418]	chr16:27375999-27376058	hs|16p12.1	GTCTGTGTGTTTTAGTTTCATCACCTGTTATCTGTGTTTGCTGAGGAGAGTGGAACAGAA
A_23_P129786	SREBF1	6720	NM_001005291	2.34846	12.008	4.36059	11.3195	11.408	12.6397	10.307	12.4315	3543	6320.42	1012.11	5184.65	P	P	P	P	0	NM_001005291	NM_001005291	Hs.592123	sterol regulatory element binding transcription factor 1	ENST00000395751	THC2470281	GO:0000122(negative regulation of transcription from RNA polymerase II promoter)|GO:0000139(Golgi membrane)|GO:0003062(regulation of heart rate by chemical signal)|GO:0003677(DNA binding)|GO:0003682(chromatin binding)|GO:0003700(sequence-specific DNA binding transcription factor activity)|GO:0005515(protein binding)|GO:0005634(nucleus)|GO:0005635(nuclear envelope)|GO:0005654(nucleoplasm)|GO:00057…	Homo sapiens sterol regulatory element binding transcription factor 1 (SREBF1), transcript variant 1, mRNA [NM_001005291]	chr17:17715478-17715419	hs|17p11.2	GGCTCCTGTGCTACTTTGCCTTTTGCAAACTTTATTTTCATAGATTGAGAAGTTTTGTAC
A_23_P130194	PYCR1	5831	NM_006907	-154.752	10.3113	-84.9118	9.57931	14.5708	7.297	13.3049	6.89697	32645.2	179.552	8247.25	118.059	P	P	P	P	0	NM_006907	NM_006907	Hs.163451	pyrroline-5-carboxylate reductase 1	ENST00000619204	THC2499322	GO:0004735(pyrroline-5-carboxylate reductase activity)|GO:0005515(protein binding)|GO:0005739(mitochondrion)|GO:0005759(mitochondrial matrix)|GO:0006561(proline biosynthetic process)|GO:0008652(cellular amino acid biosynthetic process)|GO:0034599(cellular response to oxidative stress)|GO:0034641(cellular nitrogen compound metabolic process)|GO:0042802(identical protein binding)|GO:0044281(small m…	Homo sapiens pyrroline-5-carboxylate reductase 1 (PYCR1), transcript variant 1, mRNA [NM_006907]	chr17:79890390-79890331	hs|17q25.3	CCCTGCCTGTGTGGGAGGGTGGTTACTGTGGGTGGAATAGTGGAGGCCTTCAACTGATTA
A_23_P130343	KCTD1	284252	NM_198991	-5.13859	8.78571	-4.42468	8.51653	10.0454	7.68401	9.65662	7.51105	1312.82	232.514	644.341	181.847	P	P	P	P	0	NM_198991	NM_198991	Hs.526630	potassium channel tetramerization domain containing 1	ENST00000580059	THC2629899	GO:0003714(transcription corepressor activity)|GO:0005634(nucleus)|GO:0006351(transcription, DNA-dependent)|GO:0008134(transcription factor binding)|GO:0045892(negative regulation of transcription, DNA-dependent)|GO:0051260(protein homooligomerization)	Homo sapiens potassium channel tetramerization domain containing 1 (KCTD1), transcript variant 2, mRNA [NM_198991]	chr18:24035570-24035511	hs|18q11.2	AGAGACCACACCTGTATTCATATGGGAACAATTGGAATAGTGATATCCTCAAGGTGTAAA
A_23_P130352	KCTD1	284252	NM_198991	-5.70494	5.90609	-3.18357	6.01222	7.2943	4.78209	6.90529	5.23465	174.512	32.32	95.2239	37.1058	P	P	P	P	0	NM_198991	NM_198991	Hs.526630	potassium channel tetramerization domain containing 1	ENST00000580638	THC2722589	GO:0003714(transcription corepressor activity)|GO:0005634(nucleus)|GO:0006351(transcription, DNA-dependent)|GO:0008134(transcription factor binding)|GO:0045892(negative regulation of transcription, DNA-dependent)|GO:0051260(protein homooligomerization)	Homo sapiens potassium channel tetramerization domain containing 1 (KCTD1), transcript variant 2, mRNA [NM_198991]	chr18:24056609-24056550	hs|18q11.2	TTGATGGTACAGAGCCCATTGTTTTGGACAGTCTCAAACAGCACTATTTCATTGACAGAG
A_23_P130735	SLC6A16	28968	NM_014037	4.53635	7.33092	4.31295	7.65156	6.32086	8.50239	6.66953	8.7782	87.373	400.589	81.728	433.199	P	P	P	P	0	NM_014037	NM_014037	Hs.130949	solute carrier family 6, member 16	ENST00000335875	THC2482985	GO:0005326(neurotransmitter transporter activity)|GO:0005328(neurotransmitter:sodium symporter activity)|GO:0005622(intracellular)|GO:0006836(neurotransmitter transport)|GO:0016021(integral to membrane)|GO:0055085(transmembrane transport)	Homo sapiens solute carrier family 6, member 16 (SLC6A16), mRNA [NM_014037]	chr19:49793142-49793083	hs|19q13.33	ACAACACATATACAATACTAGTGATGTCTACCAGTCCTGCTACTTCTGGGGTGCCTGTCT
A_23_P130787	QPCTL	54814	NM_017659	-4.35702	7.42654	-5.26083	7.62546	8.56371	6.44037	8.91658	6.52129	438.414	99.9133	377.607	90.8061	P	P	P	P	0	NM_017659	NM_017659	Hs.631556	glutaminyl-peptide cyclotransferase-like	ENST00000012049	THC2485671	GO:0000139(Golgi membrane)|GO:0005794(Golgi apparatus)|GO:0008270(zinc ion binding)|GO:0016020(membrane)|GO:0016021(integral to membrane)|GO:0016603(glutaminyl-peptide cyclotransferase activity)|GO:0017186(peptidyl-pyroglutamic acid biosynthetic process, using glutaminyl-peptide cyclotransferase)	Homo sapiens glutaminyl-peptide cyclotransferase-like (QPCTL), transcript variant 1, mRNA [NM_017659]	chr19:46206420-46206479	hs|19q13.32	TTGTCTCCTAATTGTGCTACAATTGGAAGACCTTCTTTCTTTTGATTGTCTCAAGCTGCC
A_23_P130836	GZMM	3004	NM_005317	60.3774	10.3799	33.4376	10.2856	7.83519	13.7511	8.06093	13.1243	256.296	13202.6	210.982	8307.91	P	P	P	P	0	NM_005317	NM_005317	Hs.465511	granzyme M (lymphocyte met-ase 1)	ENST00000264553	THC2477784	GO:0004252(serine-type endopeptidase activity)|GO:0005576(extracellular region)|GO:0006508(proteolysis)|GO:0006915(apoptotic process)|GO:0008236(serine-type peptidase activity)|GO:0016020(membrane)|GO:0019835(cytolysis)|GO:0045087(innate immune response)	Homo sapiens granzyme M (lymphocyte met-ase 1) (GZMM), transcript variant 1, mRNA [NM_005317]	chr19:549679-549738	hs|19p13.3	GAGTCCTGTCCTTCAGCTCCAGGGTCTGCACTGACATCTTCAAGCCTCCCGTGGCCACCG
A_23_P130974	KIAA1683	80726	NM_025249	14.2724	8.10306	1.12076	10.0023	6.40929	10.2444	9.9204	10.0849	92.9048	1263.94	776.744	1041.38	P	P	P	P	0	NM_025249	NM_025249	Hs.732366	KIAA1683	ENST00000599638	THC2473150	GO:0005634(nucleus)|GO:0005739(mitochondrion)	Homo sapiens KIAA1683 (KIAA1683), transcript variant 2, mRNA [NM_025249]	chr19:18367982-18367923	hs|19p13.11	GCTCCCTGCAGTGGGGACTTCGTGGGAGGCACTCATGGCTCTCTGGGTCTAATGAATAAA
A_23_P131024	ZBTB32	27033	NM_014383	-33.3036	10.5375	-8.16946	10.9531	13.3655	8.30792	12.5726	9.54232	14338.4	353.242	4914.81	727.275	P	P	P	P	0	NM_014383	NM_014383	Hs.99430	zinc finger and BTB domain containing 32	ENST00000392197	THC2760977	GO:0000122(negative regulation of transcription from RNA polymerase II promoter)|GO:0000228(nuclear chromosome)|GO:0001817(regulation of cytokine production)|GO:0003677(DNA binding)|GO:0003714(transcription corepressor activity)|GO:0005515(protein binding)|GO:0005634(nucleus)|GO:0005654(nucleoplasm)|GO:0006281(DNA repair)|GO:0006366(transcription from RNA polymerase II promoter)|GO:0008270(zinc i…	Homo sapiens zinc finger and BTB domain containing 32 (ZBTB32), mRNA [NM_014383]	chr19:36207866-36207925	hs|19q13.12	AGGAGCGAAGGTTAACAGTAGGGGAGATTGTCGATCTCATCACCATAATAAAGAGTTTCC
A_23_P131089	KANK3	256949	NM_198471	7.09645	6.29578	1.41644	6.01961	5.03897	7.86607	5.77371	6.27598	35.3158	263.693	43.6308	76.672	P	P	P	P	0	NM_198471	NM_198471	Hs.745036	KN motif and ankyrin repeat domains 3	ENST00000330915	THC2473199		Homo sapiens KN motif and ankyrin repeat domains 3 (KANK3), mRNA [NM_198471]	chr19:8387752-8387693	hs|19p13.2	GACAATGGAGAGAACCCCCAGGTTCAGTAAGCTGCCTCGTCTGGCTCACTACACCTAGCT
A_23_P131383	FANCL	55120	NM_018062	-5.52877	10.7998	-6.28066	10.309	12.1035	9.6365	11.7193	9.0684	5863.31	844.388	2663.39	531.114	P	P	P	P	0	NM_018062	NM_018062	Hs.631890	Fanconi anemia, complementation group L	ENST00000233741	THC2492588	GO:0004842(ubiquitin-protein ligase activity)|GO:0005635(nuclear envelope)|GO:0005654(nucleoplasm)|GO:0005737(cytoplasm)|GO:0006281(DNA repair)|GO:0006513(protein monoubiquitination)|GO:0006974(response to DNA damage stimulus)|GO:0007276(gamete generation)|GO:0008270(zinc ion binding)|GO:0016874(ligase activity)|GO:0031625(ubiquitin protein ligase binding)|GO:0042127(regulation of cell proliferat…	Homo sapiens Fanconi anemia, complementation group L (FANCL), transcript variant 2, mRNA [NM_018062]	chr2:58386536-58386477	hs|2p16.1	TCATTCAAAGGTTCTTGAGACTCTTGATATTTCTGTCTTCTCCTTGTGCTTTCCTATGGA
A_23_P131435	CD302	9936	NM_014880	7.94346	8.54734	55.2841	7.59999	7.1822	10.172	5.23809	11.0269	161.305	1199.41	29.9392	1991.08	P	P	P	P	0	NM_014880	NM_014880	Hs.130014	CD302 molecule	ENST00000505052	NP821287	GO:0005902(microvillus)|GO:0005938(cell cortex)|GO:0006909(phagocytosis)|GO:0016020(membrane)|GO:0016021(integral to membrane)|GO:0030175(filopodium)|GO:0030246(carbohydrate binding)	Homo sapiens CD302 molecule (CD302), transcript variant 1, mRNA [NM_014880]	chr2:160628550-160628491	hs|2q24.2	ATATCAGCATTGGTGATTGCTAGCACGGTAATTTTGACAGTTTTGGGAGCAATCATTTGG
A_23_P131449	C2orf81	388963	NM_001145054	1.93467	7.5457	-5.76962	8.05672	7.08466	8.03674	9.41954	6.89107	150.86	295.06	540.921	117.625	P	P	P	P	0	NM_001145054	NM_001145054	Hs.445377	chromosome 2 open reading frame 81	ENST00000290390	THC2649713		Homo sapiens chromosome 2 open reading frame 81 (C2orf81), mRNA [NM_001145054]	chr2:74641561-74641502	hs|2p13.1	GGTGTTGCTCAGCTCTGGTGTGCCTGAACAAGAGGACAAAGAAGGTAGCACCTTTCCTCC
A_23_P131825	TNNC2	7125	NM_003279	5.34826	7.20765	9.1212	8.84541	6.09889	8.51796	7.39339	10.5826	74.1975	404.669	131.814	1463.1	P	P	P	P	0	NM_003279	NM_003279	Hs.182421	troponin C type 2 (fast)	ENST00000372557	THC2757977	GO:0003009(skeletal muscle contraction)|GO:0003779(actin binding)|GO:0005509(calcium ion binding)|GO:0005829(cytosol)|GO:0005861(troponin complex)|GO:0006937(regulation of muscle contraction)|GO:0030049(muscle filament sliding)	Homo sapiens troponin C type 2 (fast) (TNNC2), mRNA [NM_003279]	chr20:44452639-44451969	hs|20q13.12	GACTTCGACGAGTTCCTGAAGATGATGGAGGACGTGCAGTAAGGAGTGGACAGTCGCCTC
A_23_P131846	SNAI1	6615	NM_005985	3.79713	6.40646	39.2693	7.81631	5.51589	7.4408	5.6049	10.9002	49.1903	197.531	38.776	1818.96	P	P	P	P	0	NM_005985	NM_005985	Hs.48029	snail family zinc finger 1	ENST00000244050	THC2463607	GO:0000122(negative regulation of transcription from RNA polymerase II promoter)|GO:0000977(RNA polymerase II regulatory region sequence-specific DNA binding)|GO:0001078(RNA polymerase II core promoter proximal region sequence-specific DNA binding transcription factor activity involved in negative regulation of transcription)|GO:0001649(osteoblast differentiation)|GO:0001707(mesoderm formation)|G…	Homo sapiens snail family zinc finger 1 (SNAI1), mRNA [NM_005985]	chr20:48605170-48605229	hs|20q13.13	AACAATGTCTGAAAAGGGACTGTGAGTAATGGCTGTCACTTGTCGGGGGCCCAAGTGGGG
A_23_P131866	AURKA	6790	NM_198433	-19.5698	8.20799	-11.985	7.93351	10.629	6.33843	9.92487	6.34171	2018.48	93.3169	778.046	80.1433	P	P	P	M	0	NM_198433	NM_198433	Hs.250822	aurora kinase A	ENST00000347343	THC2603262	GO:0000086(G2/M transition of mitotic cell cycle)|GO:0000278(mitotic cell cycle)|GO:0000780(condensed nuclear chromosome, centromeric region)|GO:0004672(protein kinase activity)|GO:0004674(protein serine/threonine kinase activity)|GO:0004712(protein serine/threonine/tyrosine kinase activity)|GO:0005515(protein binding)|GO:0005524(ATP binding)|GO:0005634(nucleus)|GO:0005813(centrosome)|GO:0005819(…	Homo sapiens aurora kinase A (AURKA), transcript variant 1, mRNA [NM_198433]	chr20:54945179-54945120	hs|20q13.2	CTGCCATATAACCTGACAGGAACATGCTACTGAAGTTTATTTTACCATTGACTGCTGCCC
A_23_P132121	SIK1	150094	NM_173354	1.96273	8.77943	5.48101	11.0061	8.30647	9.27933	9.84705	12.3015	363.59	672.625	736.275	4746.22	P	P	P	P	0	NM_173354	NM_173354	Hs.282113	salt-inducible kinase 1	ENST00000270162	THC2468197	GO:0000287(magnesium ion binding)|GO:0002028(regulation of sodium ion transport)|GO:0004674(protein serine/threonine kinase activity)|GO:0005515(protein binding)|GO:0005524(ATP binding)|GO:0005634(nucleus)|GO:0005737(cytoplasm)|GO:0006468(protein phosphorylation)|GO:0007049(cell cycle)|GO:0007346(regulation of mitotic cell cycle)|GO:0008140(cAMP response element binding protein binding)|GO:001083…	Homo sapiens salt-inducible kinase 1 (SIK1), mRNA [NM_173354]	chr21:44834819-44834760	hs|21q22.3	CCAACACAAAACTCCTTCCCCTTTTTAAAATGATTTCTGTTCTAATGCCATAGATCAAAG
A_23_P132159	USP18	11274	NM_017414	-5.7652	9.82188	-1.9537	8.06631	11.1665	8.63915	8.56387	7.59767	2975.6	438.273	298.679	193.206	P	P	P	P	0	NM_017414	NM_017414	Hs.38260	ubiquitin specific peptidase 18	ENST00000215794	THC2471774	GO:0004197(cysteine-type endopeptidase activity)|GO:0004843(ubiquitin-specific protease activity)|GO:0005515(protein binding)|GO:0005634(nucleus)|GO:0005829(cytosol)|GO:0016579(protein deubiquitination)|GO:0019221(cytokine-mediated signaling pathway)|GO:0019785(ISG15-specific protease activity)|GO:0043161(proteasomal ubiquitin-dependent protein catabolic process)|GO:0060337(type I interferon-medi…	Homo sapiens ubiquitin specific peptidase 18 (USP18), mRNA [NM_017414]	chr22:18659618-18659677	hs|22q11.21	CTGTCATTTTCCATTTCCGTTCCTGGATCTACGGAGTCTTCTAAGAGATTTTGCAATGAG
A_23_P132175	RTN4R	65078	NM_023004	13.6947	6.41862	2.33869	6.73202	4.8027	8.57825	6.14701	7.37271	29.6352	421.05	56.2787	165.556	P	P	P	P	0	NM_023004	NM_023004	Hs.30868	reticulon 4 receptor	ENST00000043402	THC2620422	GO:0004872(receptor activity)|GO:0005515(protein binding)|GO:0005783(endoplasmic reticulum)|GO:0005886(plasma membrane)|GO:0007409(axonogenesis)|GO:0009986(cell surface)|GO:0030426(growth cone)|GO:0031225(anchored to membrane)|GO:0048011(nerve growth factor receptor signaling pathway)|GO:0050770(regulation of axonogenesis)|GO:0050771(negative regulation of axonogenesis)|GO:0070062(extracellular v…	Homo sapiens reticulon 4 receptor (RTN4R), mRNA [NM_023004]	chr22:20229029-20228970	hs|22q11.21	CTCCCACCCAGATCGCGGTATATAGAGATATGCATTTTATTTTACTTGTGTAAAAATATC
A_23_P132226	TPST2	8459	NM_001008566	4.32779	11.8589	2.38061	11.6712	10.8491	12.9627	11.0623	12.3137	2362.61	7798.3	1679.6	4785.31	P	P	P	M	0	NM_001008566	NM_001008566	Hs.632768	tyrosylprotein sulfotransferase 2	ENST00000403880	THC2465898	GO:0000139(Golgi membrane)|GO:0005783(endoplasmic reticulum)|GO:0006478(peptidyl-tyrosine sulfation)|GO:0007342(fusion of sperm to egg plasma membrane)|GO:0008476(protein-tyrosine sulfotransferase activity)|GO:0016020(membrane)|GO:0016021(integral to membrane)|GO:0060468(prevention of polyspermy)|GO:0070062(extracellular vesicular exosome)	Homo sapiens tyrosylprotein sulfotransferase 2 (TPST2), transcript variant 1, mRNA [NM_001008566]	chr22:26922050-26921991	hs|22q12.1	GACACTCCAGGGTAGAGAATGAAGGGTATGGAAGTAGTCCGGCTTTTGAAACTTAGGTAT
A_23_P132793	MANF	7873	NM_006010	-4.81615	14.254	-3.20342	13.7291	15.433	13.1651	14.5946	12.915	58420.9	8897	20719.9	7211.93	P	P	P	P	0	NM_006010	NM_006010	Hs.436446	mesencephalic astrocyte-derived neurotrophic factor	ENST00000470900	THC2468566	GO:0002014(vasoconstriction of artery involved in ischemic response to lowering of systemic arterial blood pressure)|GO:0005615(extracellular space)|GO:0005634(nucleus)|GO:0005783(endoplasmic reticulum)|GO:0006986(response to unfolded protein)|GO:0008083(growth factor activity)|GO:0008150(biological_process)|GO:0048471(perinuclear region of cytoplasm)	Homo sapiens mesencephalic astrocyte-derived neurotrophic factor (MANF), mRNA [NM_006010]	chr3:51426687-51426746	hs|3p21.2	GGATTCCCTTCCTTCTGTTGCTGGTGTACTCTAGGACTTCAAAGTGTGTCTGGGATTTTT
A_23_P132874	CMSS1	84319	NM_032359	-4.59604	12.0442	-2.0987	11.304	13.1945	10.9942	11.8514	10.7819	12731.4	2111.64	2919.84	1672.13	P	P	P	P	0	NM_032359	NM_032359	Hs.581320	cms1 ribosomal small subunit homolog (yeast)	ENST00000421999	THC2466439		Homo sapiens cms1 ribosomal small subunit homolog (yeast) (CMSS1), transcript variant 1, mRNA [NM_032359]	chr3:99897343-99897402	hs|3q12.1	TGTGTCAACAGATGGATCACTGGAATGTGGGGATTCTGAAACAGAAATGAAACTGTCCTT
A_23_P133095	RAPGEF2	9693	NM_014247	-4.28312	11.3426	1.02187	11.3252	12.4403	10.3417	11.3096	11.3408	7515.52	1350.08	2002.17	2479.9	P	P	P	P	0	NM_014247	NM_014247	Hs.744884	Rap guanine nucleotide exchange factor (GEF) 2	ENST00000264431	THC2498164	GO:0000165(MAPK cascade)|GO:0001568(blood vessel development)|GO:0001764(neuron migration)|GO:0004871(signal transducer activity)|GO:0005088(Ras guanyl-nucleotide exchange factor activity)|GO:0005509(calcium ion binding)|GO:0005515(protein binding)|GO:0005737(cytoplasm)|GO:0005770(late endosome)|GO:0005829(cytosol)|GO:0005886(plasma membrane)|GO:0005887(integral to plasma membrane)|GO:0005911(cel…	Homo sapiens Rap guanine nucleotide exchange factor (GEF) 2 (RAPGEF2), mRNA [NM_014247]	chr4:160281049-160281108	hs|4q32.1	CTGCTAATCTCAGTTCGCTCTGTGATGTCAAGTGCAGAATGTACAATTAACTGGTGATTT
A_23_P133123	MND1	84057	NM_032117	-66.1671	7.66041	-42.4826	6.96477	11.2597	5.21166	10.1758	4.767	3181.46	43.8466	923.547	27.0874	P	P	P	P	0	NM_032117	NM_032117	Hs.294088	meiotic nuclear divisions 1 homolog (S. cerevisiae)	ENST00000622785	THC2474450	GO:0003677(DNA binding)|GO:0005634(nucleus)|GO:0006310(DNA recombination)|GO:0051321(meiotic cell cycle)	Homo sapiens meiotic nuclear divisions 1 homolog (S. cerevisiae) (MND1), transcript variant 1, mRNA [NM_032117]	chr4:154335985-154336044	hs|4q31.3	AGAAGACTTTGACTACATAGACTAAAATATTCCATGGTGGTGAAGGATGTACAAGCTTGT
A_23_P133648	FAM8A1	51439	NM_016255	2.81605	6.37643	5.24925	5.66639	5.67318	7.16685	4.59519	6.98731	54.8671	164.314	19.8531	125.477	P	P	P	P	0	NM_016255	NM_016255	Hs.95260	family with sequence similarity 8, member A1	ENST00000259963	THC2465886	GO:0016021(integral to membrane)	Homo sapiens family with sequence similarity 8, member A1 (FAM8A1), mRNA [NM_016255]	chr6:17611415-17611474	hs|6p22.3	ACTTCGCCCGAATTACAAAATGAGTGTTTTTAGATTCAAGTGACGGTAAAAGGATTTGTT
[truncated: 2,710 more rows]
